# Supplementary material
Source: PubMed Central journal article supplement (PMC3913098)

# Total Syntheses of the Monoterpene Indole Alkaloids

## (±)-Alstilobanine A and E, and (±)-Angustilodine

Yiqing Feng, Max M. Majireck and Steven M. Weinreb\*

*Department of Chemistry, The Pennsylvania State University, University Park,  
Pennsylvania 16802, United States*

### SUPPORTING INFORMATION - Table of Contents

|                                                |          |
|------------------------------------------------|----------|
| <sup>1</sup> H and <sup>13</sup> C NMR Spectra | S1-128 * |
| 2D NMR Spectra for <b>55</b>                   | S56-59   |
| NOESY Spectra for <b>60</b>                    | S67      |
| NOESY Spectra for <b>64</b>                    | S76      |
| 2D NMR Spectra for (±)- <b>3</b>               | S79-82   |
| 2D NMR Spectra for <b>66</b>                   | S87-90   |
| 2D NMR Spectra for <b>67</b>                   | S93-96   |
| HMBC Spectra for <b>70</b>                     | S102     |
| 2D NMR Spectra for <b>78</b>                   | S118-121 |

\*except the pages listed above for 2D spectrums

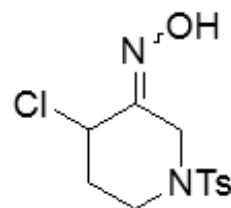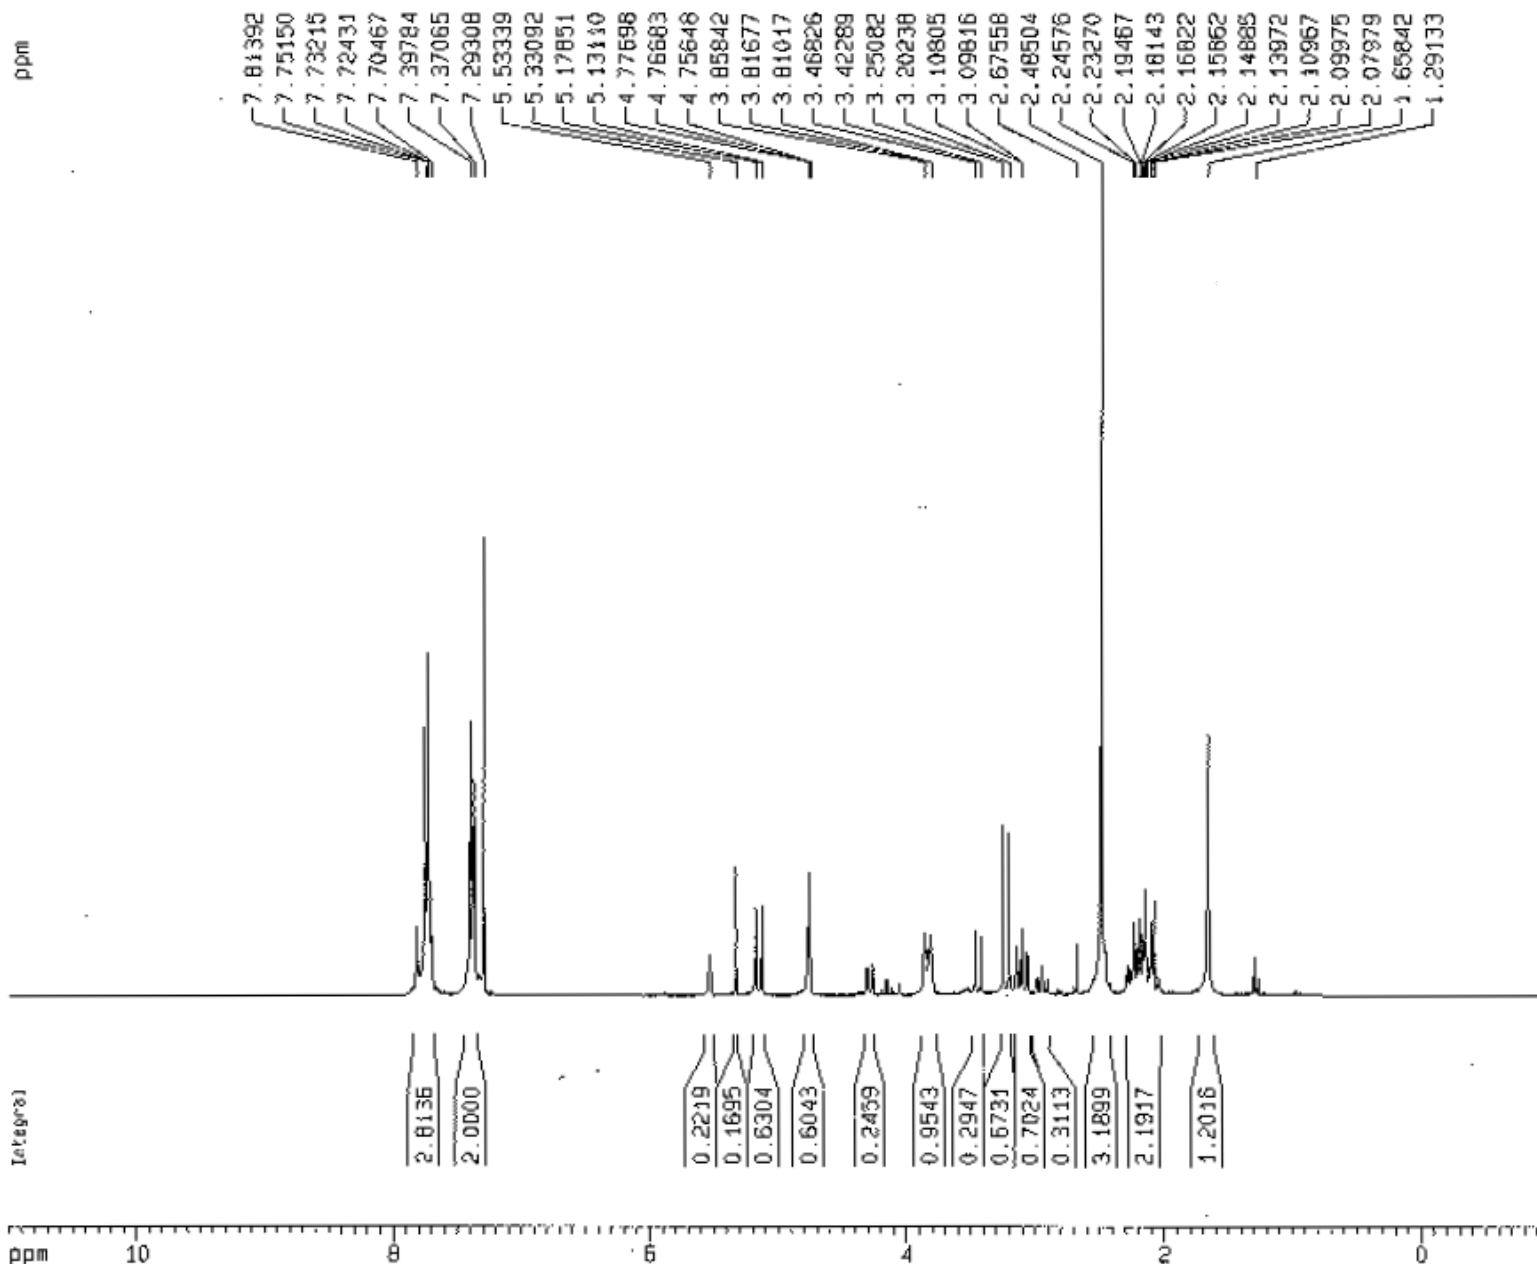

## Current Data Parameters

NAME 061610  
EXPNO 1  
PROCNO 1

## F2 - Acquisition Parameters

Date\_ 20100618  
Time 14.20  
INSTRUM spect  
PROBHD 5 mm GNP 1H/1  
PULPROG zg30  
TD 24690  
SOLVENT CDCl3  
NS 16  
DS 2  
SWH 6172.839 Hz  
FIDRES 0.250014 Hz  
AQ 1.9999400 sec  
RG 645.1  
DM 81.000 usec  
DE 6.00 usec  
TE 300.0 K  
D1 1.00000000 sec

## ----- CHANNEL f1 -----

MU1 1H  
P1 11.70 usec  
PL1 0.00 dB  
SF01 299.8718518 MHz

## F2 - Processing parameters

SI 32768  
SF 299.8700000 MHz  
WDW no  
SSB 0  
LB 0.00 Hz  
GB 0  
PC 1.00

## 1D NMR plot parameters

CX 20.00 cm  
FJP 11.000 ppm  
F1 3298.57 Hz  
F2P -1.000 ppm  
F2 -299.87 Hz  
PPMCM 0.60000 ppm/cm  
HZCM 179.92200 Hz/cm

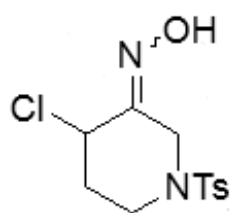

15

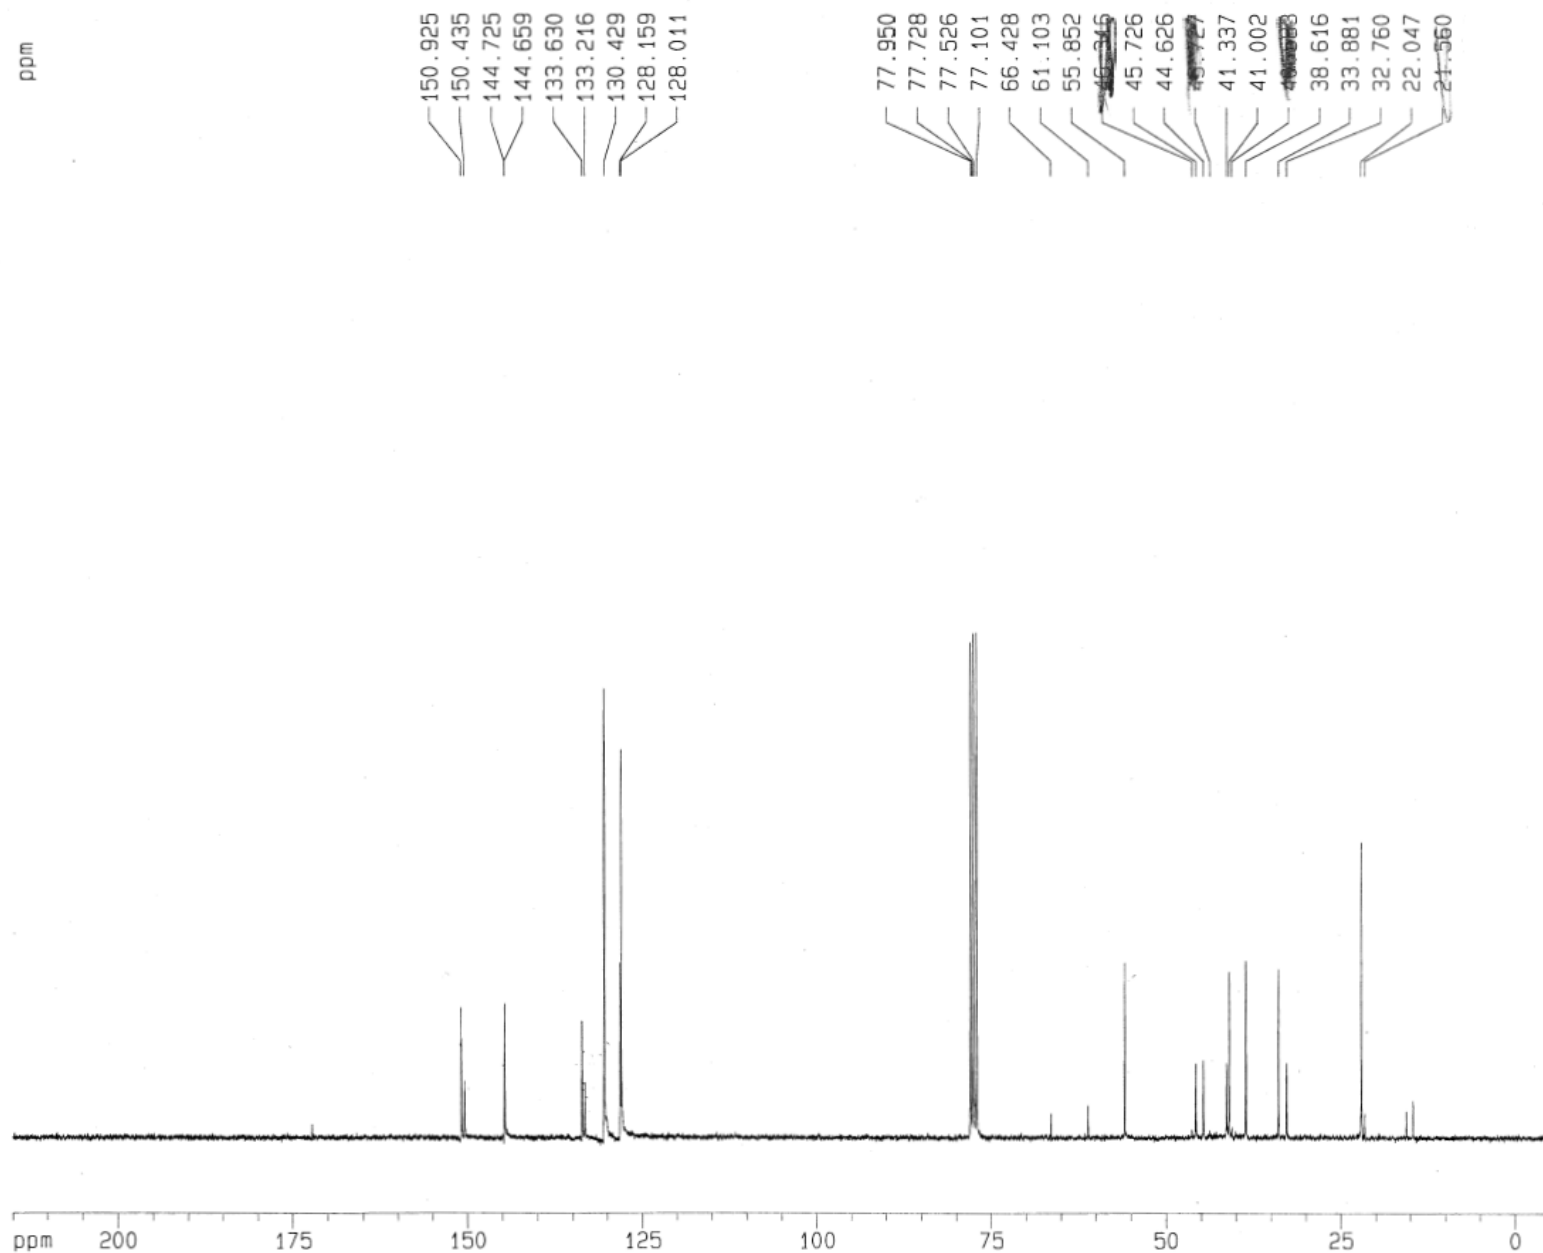

## Current Data Parameters

NAME 092613FJV-C10x  
EXPNO 2  
PROCNO 1

## F2 - Acquisition Parameters

Date\_ 20130926  
Time 17.33  
INSTRUM spect  
PROBHD 5 mm GNP 1H/1  
PULPROG zgpg30  
TD 65536  
SOLVENT CDCl3  
NS 1781  
DS 4  
SWH 18796.992 Hz  
FIDRES 0.286819 Hz  
AQ 1.7433076 sec  
RG 1024  
DW 26.600 usec  
DE 6.00 usec  
TE 300.0 K  
D1 2.0000000 sec  
D11 0.0300000 sec  
D12 0.0000200 sec

## ===== CHANNEL f1 =====

NUC1 13C  
P1 5.25 usec  
PL1 -6.00 dB  
SFO1 75.4106357 MHz

## ===== CHANNEL f2 =====

CPDPRG2 waltz16  
NUC2 1H  
PCPD2 115.00 usec  
PL2 0.00 dB  
PL12 19.70 dB  
PL13 19.70 dB  
SFO2 299.8711995 MHz

## F2 - Processing parameters

SI 32768  
SF 75.4023410 MHz  
WDW EM  
SSB 0  
LB 1.00 Hz  
GB 0  
PC 1.40

## 1D NMR plot parameters

CX 20.00 cm  
F1P 215.000 ppm  
F1 16211.50 Hz  
F2P -5.000 ppm  
F2 -377.01 Hz  
PPMCM 11.00000 ppm/cm  
HZCM 829.42578 Hz/cm

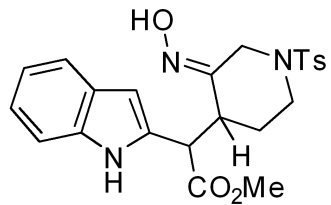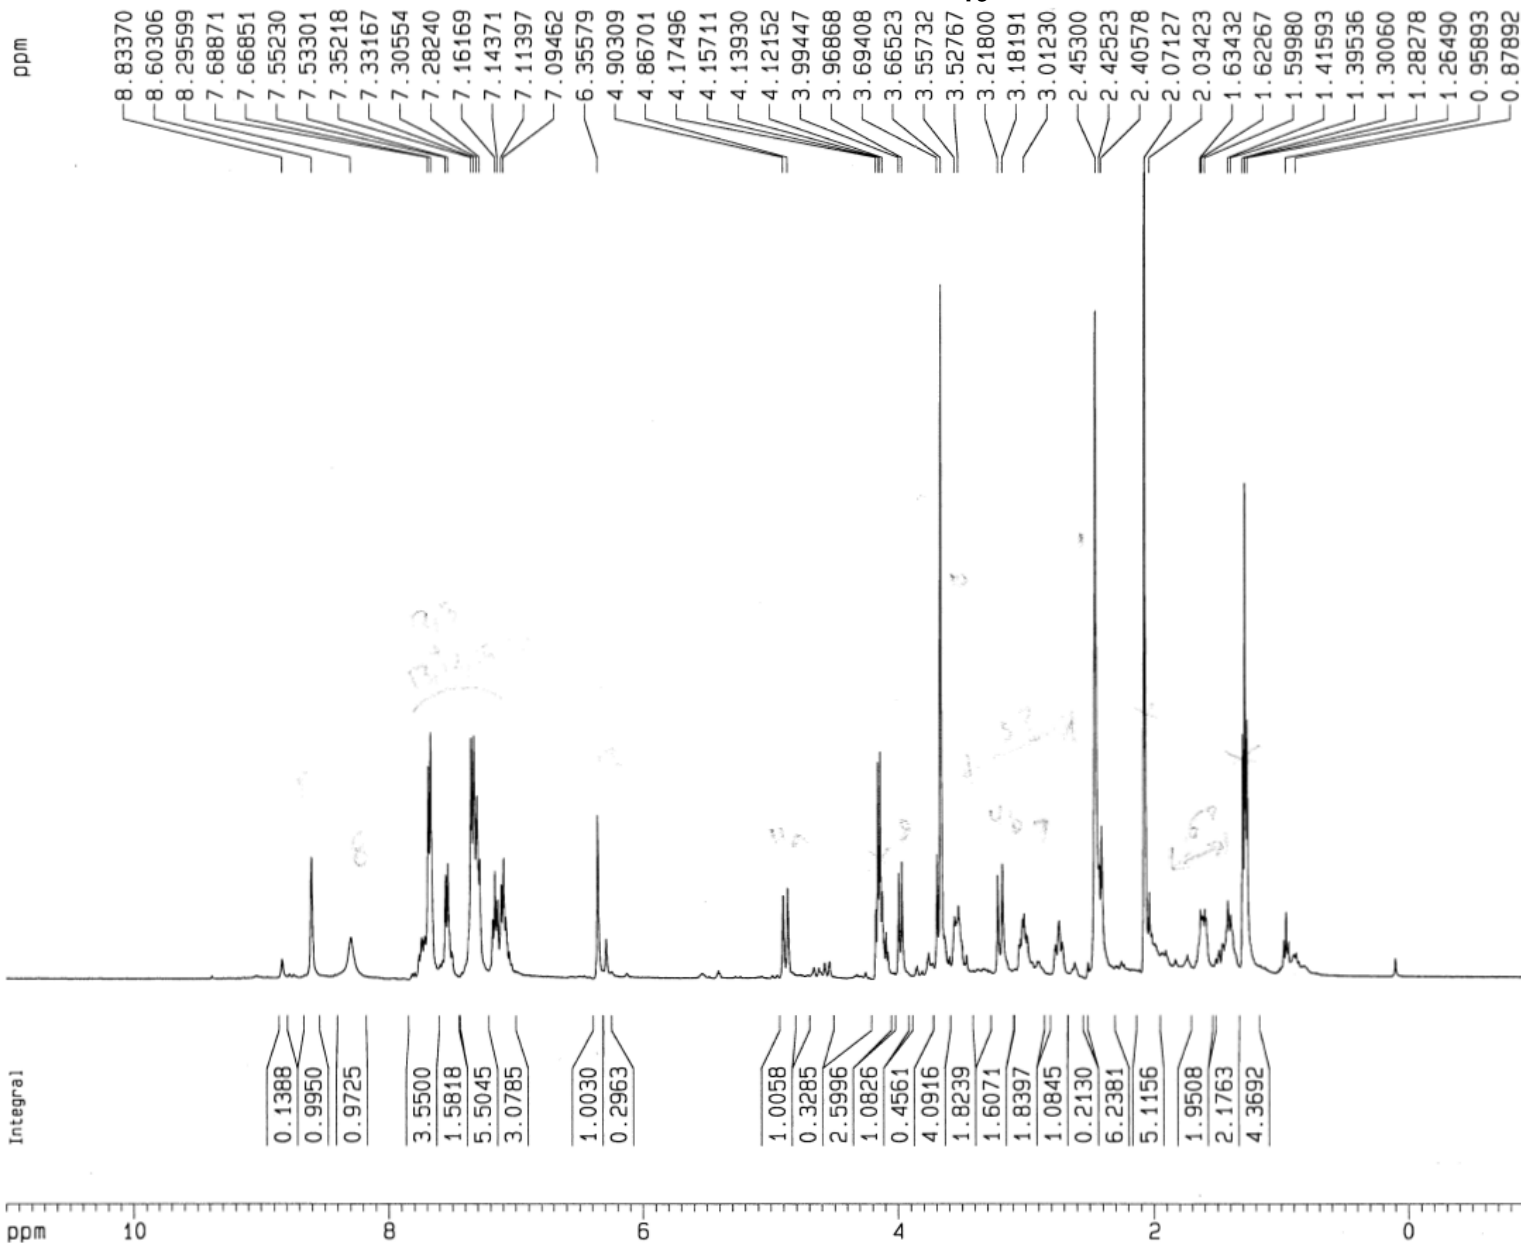

Current Data Parameters  
NAME mmm4053  
EXPNO 2  
PROCNO 1

F2 - Acquisition Parameters  
Date\_ 20090527  
Time 15.04  
INSTRUM spect  
PROBHD 5 mm BBI 1H-B  
PULPROG zg30  
TD 33110  
SOLVENT CDCl3  
NS 16  
DS 2  
SWH 8278.146 Hz  
FIDRES 0.250019 Hz  
AQ 1.9998940 sec  
RG 71.8  
DW 60.400 usec  
DE 6.00 usec  
TE 300.0 K  
D1 1.00000000 sec

===== CHANNEL f1 =====  
NUC1 1H  
P1 6.45 usec  
PL1 0.00 dB  
SF01 400.1324710 MHz

F2 - Processing parameters  
SI 32768  
SF 400.1300000 MHz  
WDW nc  
SSB 0  
LB 0.00 Hz  
GB 0  
PC 1.00

1D NMR plot parameters  
CX 20.00 cm  
F1P 11.000 ppm  
F1 4401.43 Hz  
F2P -1.000 ppm  
F2 -400.13 Hz  
PPMCM 0.60000 ppm/cm  
HZCM 240.07800 Hz/cm



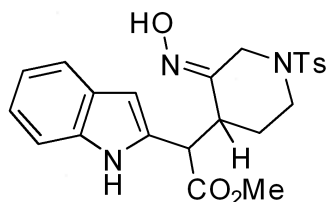

19

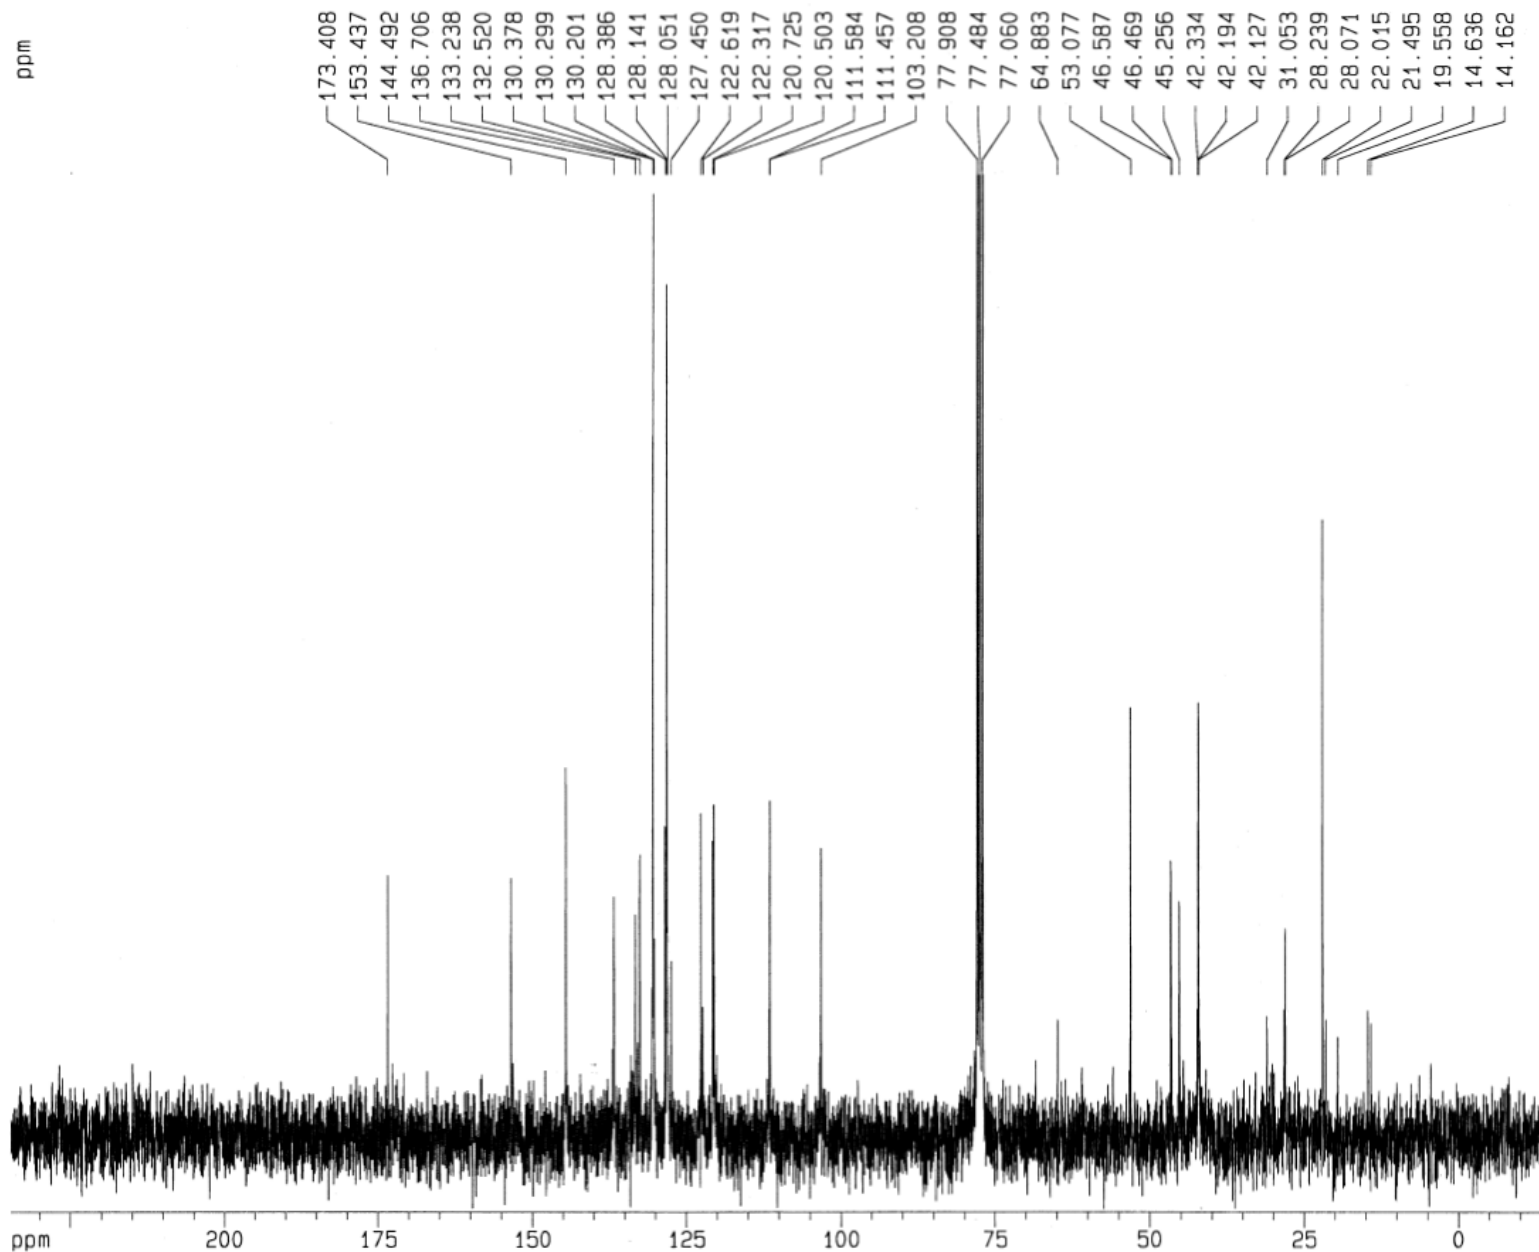

## Current Data Parameters

NAME mm5053 4053  
EXPNO 11  
PROCNO 1

## F2 - Acquisition Parameters

Date\_ 20090529  
Time 10.08  
INSTRUM spect  
PROBHD 5 mm GNP 1H/1  
PULPROG zgpg30  
TD 65536  
SOLVENT CDCl3  
NS 1024  
DS 4  
SWH 18796.992 Hz  
FIDRES 0.286819 Hz  
AQ 1.7433076 sec  
RG 4096  
DW 26.600 usec  
DE 6.00 usec  
TE 300.0 K  
D1 2.00000000 sec  
D11 0.03000000 sec  
D12 0.00002000 sec

## ===== CHANNEL f1 =====

NUC1 13C  
P1 5.40 usec  
PL1 -6.00 dB  
SF01 75.4106357 MHz

## ===== CHANNEL f2 =====

CPOPRG2 waltz16  
NUC2 1H  
PCPD2 115.00 usec  
PL2 0.00 dB  
PL12 20.00 dB  
PL13 20.00 dB  
SF02 299.8711995 MHz

## F2 - Processing parameters

SI 32768  
SF 75.4023410 MHz  
WDW EM  
SSB 0  
LB 1.00 Hz  
GB 0  
PC 1.40

## 1D NMR plot parameters

CX 20.00 cm  
F1P 234.651 ppm  
F1 17693.24 Hz  
F2P -14.638 ppm  
F2 -1103.75 Hz  
PPMCM 12.46446 ppm/cm  
HZCM 939.84955 Hz/cm

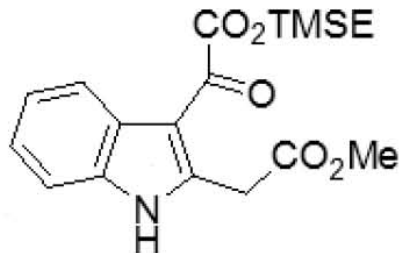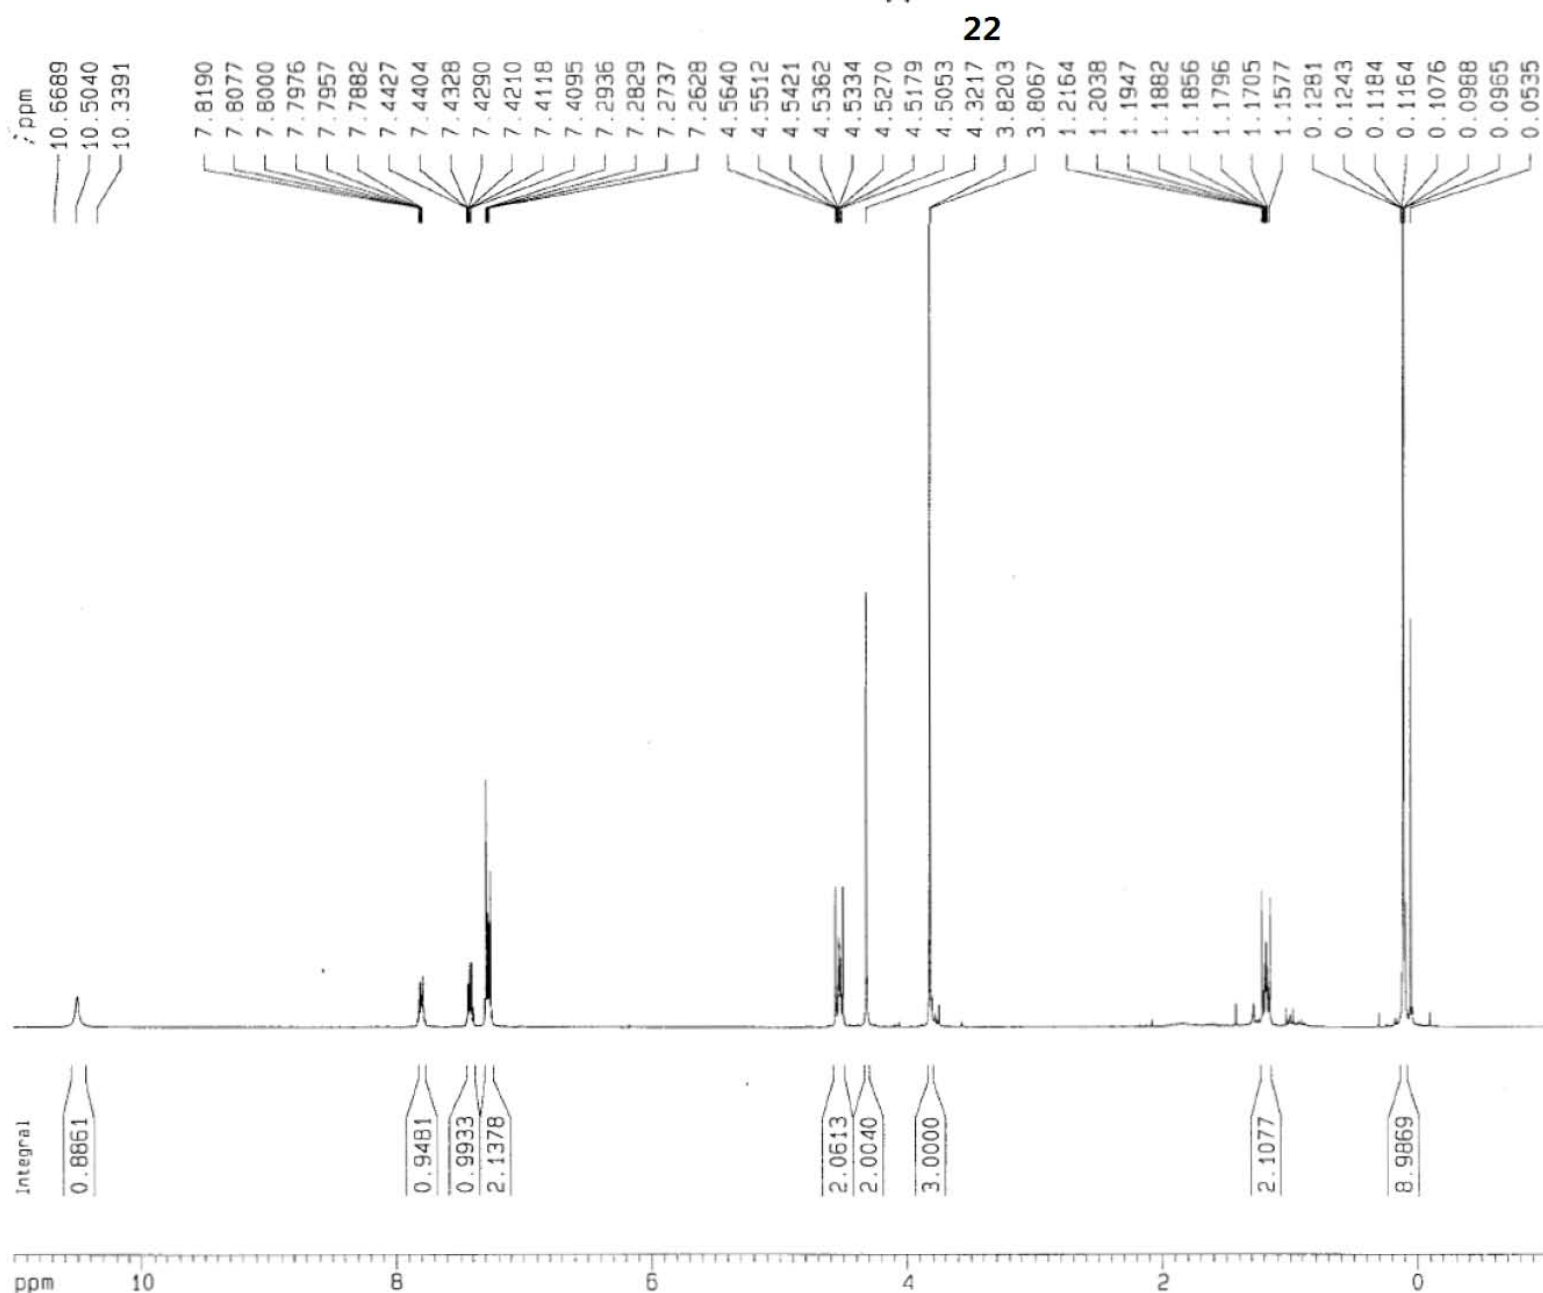

Current Data Parameters  
 NAME 093009mm4170  
 EXPNO 1  
 PROCNO 1

F2 - Acquisition Parameters  
 Date\_ 20090930  
 Time 16.33  
 INSTRUM spect  
 PROBHD 5 mm QNP 1H/1  
 PULPROG zg30  
 TO 24690  
 SOLVENT CDCl3  
 NS 16  
 DS 2  
 SWH 6172.839 Hz  
 FIDRES 0.250014 Hz  
 AQ 1.9999400 sec  
 RG 143.7  
 OW 81.000 usec  
 DE 6.00 usec  
 TE 300.0 K  
 D1 1.00000000 sec

----- CHANNEL f1 -----  
 NUC1 1H  
 P1 11.70 usec  
 PL1 0.00 dB  
 SFO1 299.8718518 MHz

F2 - Processing parameters  
 SI 32768  
 SF 299.8700000 MHz  
 WDW no  
 SSB 0  
 LB 0.00 Hz  
 GB 0  
 PC 1.00

1D NMR plot parameters  
 CX 20.00 cm  
 F1P 11.000 ppm  
 F1 3298.57 Hz  
 F2P -1.000 ppm  
 F2 -299.87 Hz  
 PPMCM 0.60000 ppm/cm  
 HZCM 179.92200 Hz/cm

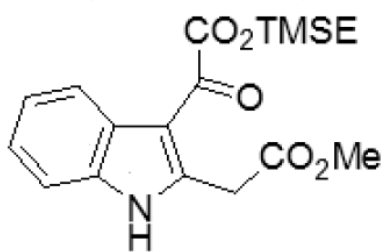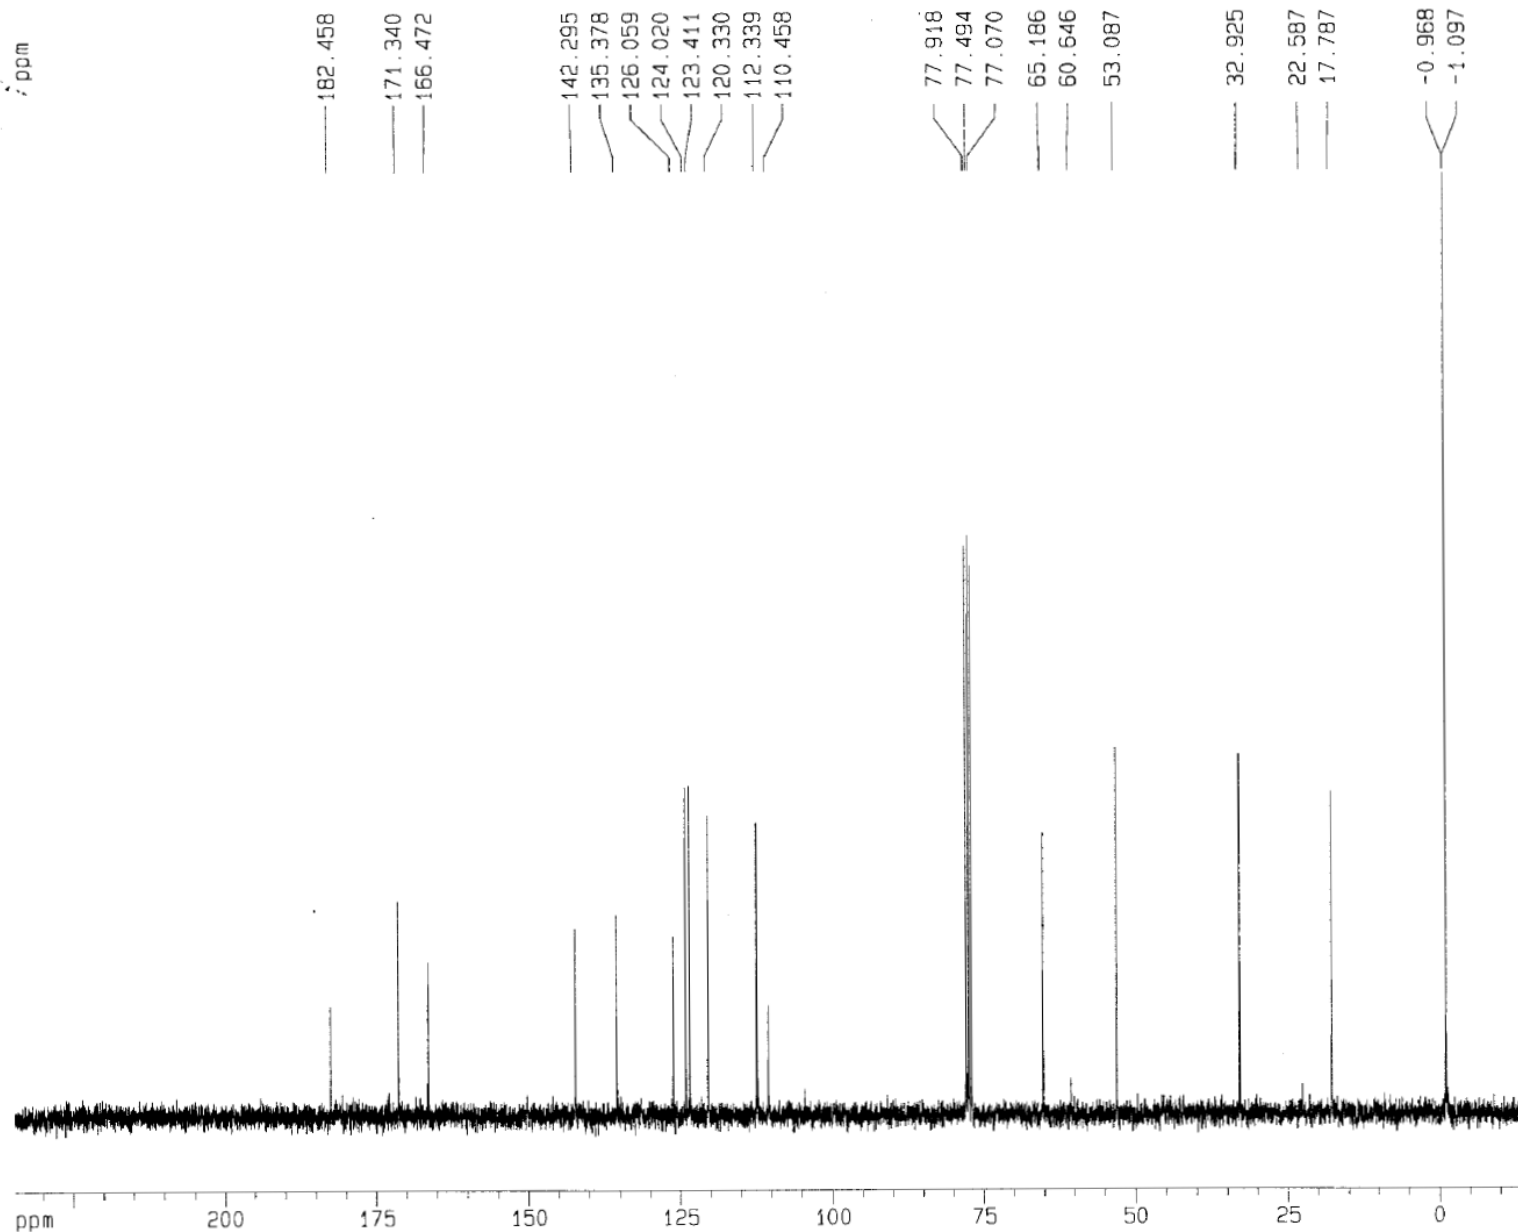

Current Data Parameters  
 NAME 093009mm4170  
 EXPNO 2  
 PROCNO 1

F2 - Acquisition Parameters  
 Date\_ 20090930  
 Time 16.44  
 INSTRUM spect  
 PROBHD 5 mm QNP 1H/1  
 PULPROG zgpg30  
 TD 32768  
 SOLVENT CDC13  
 NS 172  
 DS 4  
 SWH 18796.992 Hz  
 FIDRES 0.573639 Hz  
 AQ 0.8716788 sec  
 RG 2048  
 DW 26.600 usec  
 DE 6.00 usec  
 TE 300.0 K  
 D1 2.0000000 sec  
 D11 0.0300000 sec  
 D12 0.0000200 sec

===== CHANNEL f1 =====  
 NUC1 13C  
 P1 5.40 usec  
 PL1 -6.00 dB  
 SF01 75.4106357 MHz

===== CHANNEL f2 =====  
 CPOPRG2 waltz16  
 NUC2 1H  
 PCPD2 115.00 usec  
 PL2 0.00 dB  
 PL12 20.00 dB  
 PL13 20.00 dB  
 SF02 299.8711995 MHz

F2 - Processing parameters  
 SI 32768  
 SF 75.4023410 MHz  
 WDW EM  
 SSB 0  
 LB 1.00 Hz  
 GB 0  
 PC 1.40

1D NMR plot parameters  
 CX 20.00 cm  
 F1P 234.651 ppm  
 F1 17693.24 Hz  
 F2P -14.638 ppm  
 F2 -1103.75 Hz  
 PPMCM 12.46446 ppm/cm  
 HZCM 939.84955 Hz/cm

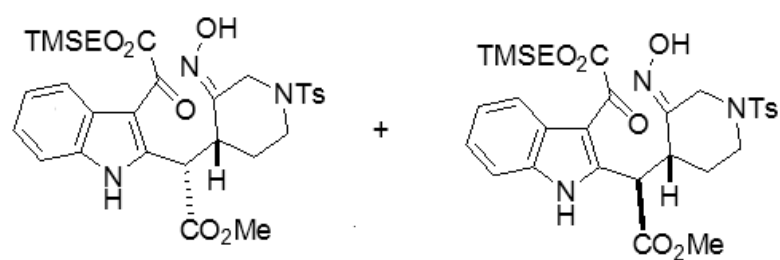

### Unseparated diastereomeric products of Nitroso Alkene Michael Addition

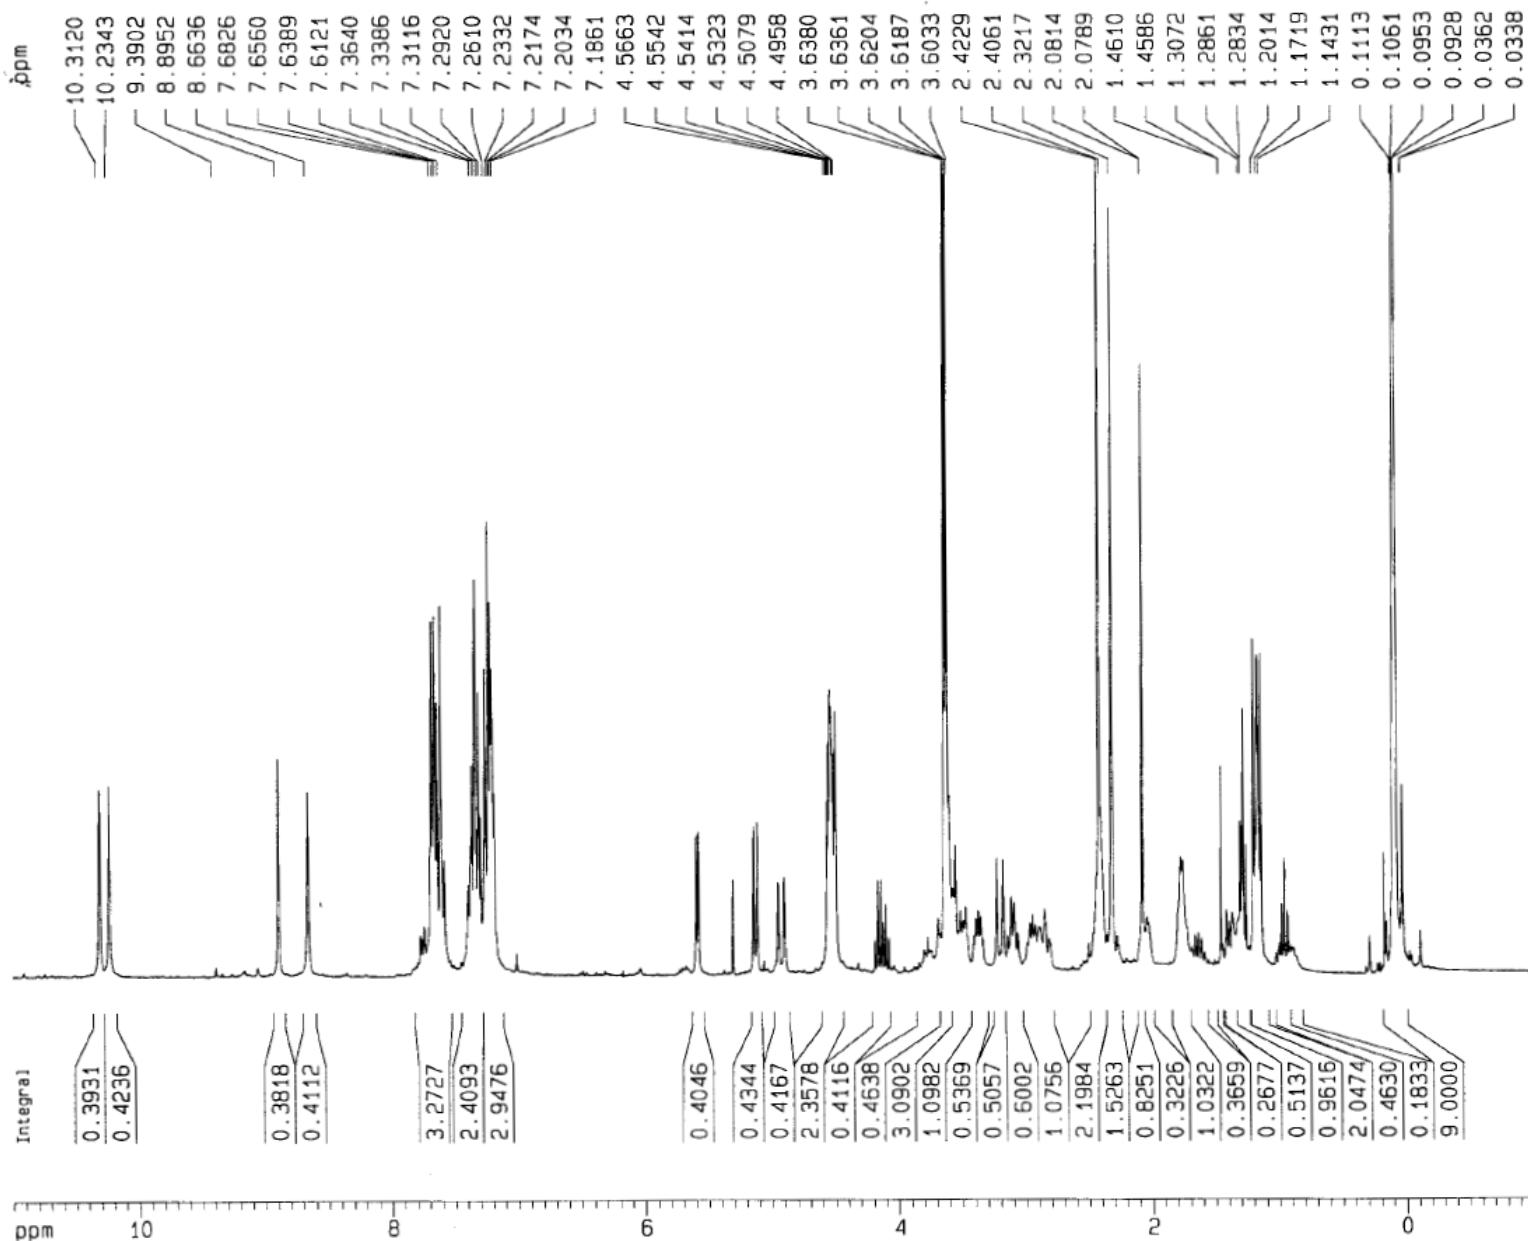

#### Current Data Parameters

NAME 012610mm4281  
EXPNO 1  
PROCNO 1

#### F2 - Acquisition Parameters

Date\_ 20100126  
Time 8.51  
INSTRUM spect  
PROBHD 5 mm GNP 1H/1  
PULPROG zg30  
TD 24690  
SOLVENT CDCl3  
NS 8  
DS 2  
SWH 6172.839 Hz  
FIDRES 0.250014 Hz  
AQ 1.9999400 sec  
RG 80.6  
DW 81.000 usec  
DE 6.00 usec  
TE 300.0 K  
D1 1.00000000 sec

#### ----- CHANNEL f1 -----

NUC1 1H  
P1 11.70 usec  
PL1 0.00 dB  
SFO1 299.8718518 MHz

#### F2 - Processing parameters

SI 32768  
SF 299.8700000 MHz  
WDW no  
SSB 0  
LB 0.00 Hz  
GB 0  
PC 1.00

#### 1D NMR plot parameters

CX 20.00 cm  
F1P 11.000 ppm  
F1 3298.57 Hz  
F2P -1.000 ppm  
F2 -299.87 Hz  
PPMCM 0.60000 ppm/cm  
HZCM 179.92200 Hz/cm

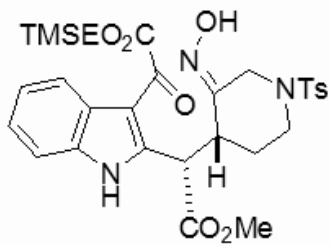

+

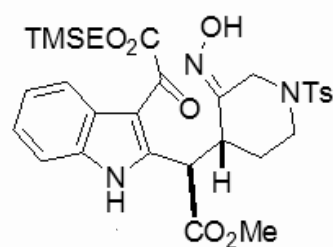

### Unseparated diastereomeric products of Nitroso Alkene Michael Addition

24a

24b

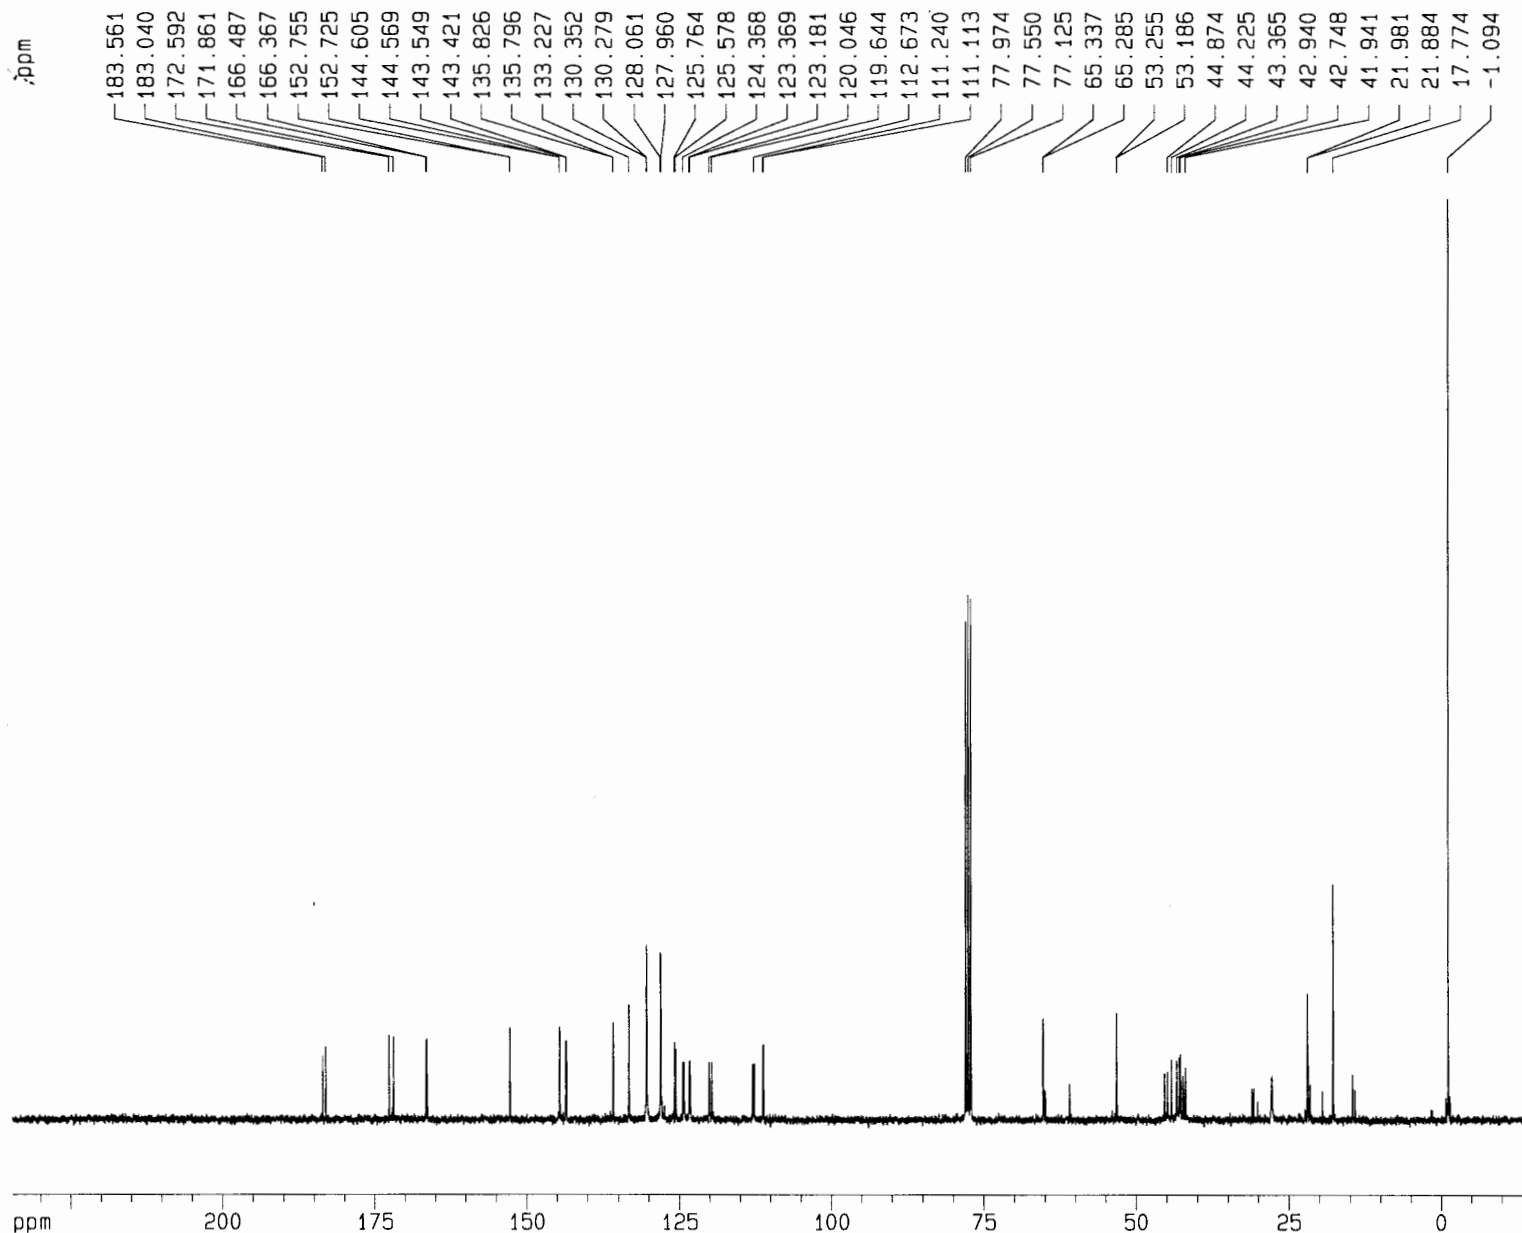

Current Data Parameters  
NAME 012610mm42B1  
EXPNO 2  
PROCNO 1

F2 - Acquisition Parameters  
Date\_ 20100126  
Time 9.40  
INSTRUM spect  
PROBHD 5 mm GNP 1H/1  
PULPROG zgpg30  
TD 32768  
SOLVENT CDCl3  
NS 1024  
DS 4  
SWH 18796.992 Hz  
FIDRES 0.573639 Hz  
AQ 0.8716788 sec  
RG 512  
DW 26.600 usec  
DE 6.00 usec  
TE 300.0 K  
D1 2.0000000 sec  
D11 0.0300000 sec  
D12 0.0002000 sec

===== CHANNEL f1 =====  
NUC1 13C  
P1 5.40 usec  
PL1 -6.00 dB  
SF01 75.4106357 MHz

===== CHANNEL f2 =====  
CPDPRG2 waltz16  
NUC2 1H  
PCPD2 115.00 usec  
PL2 0.00 dB  
PL12 20.00 dB  
PL13 20.00 dB  
SF02 299.8711995 MHz

F2 - Processing parameters  
SI 32768  
SF 75.4023410 MHz  
WDW EM  
SSB 0  
LB 1.00 Hz  
GB 0  
PC 1.40

1D NMR plot parameters  
CX 20.00 cm  
F1P 234.651 ppm  
F1 17693.24 Hz  
F2P -14.638 ppm  
F2 -1103.75 Hz  
PPMCM 12.46446 ppm/cm  
HZCM 939.84967 Hz/cm

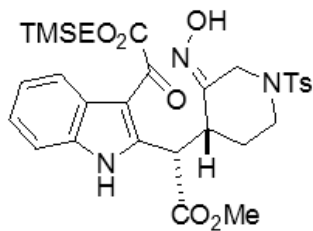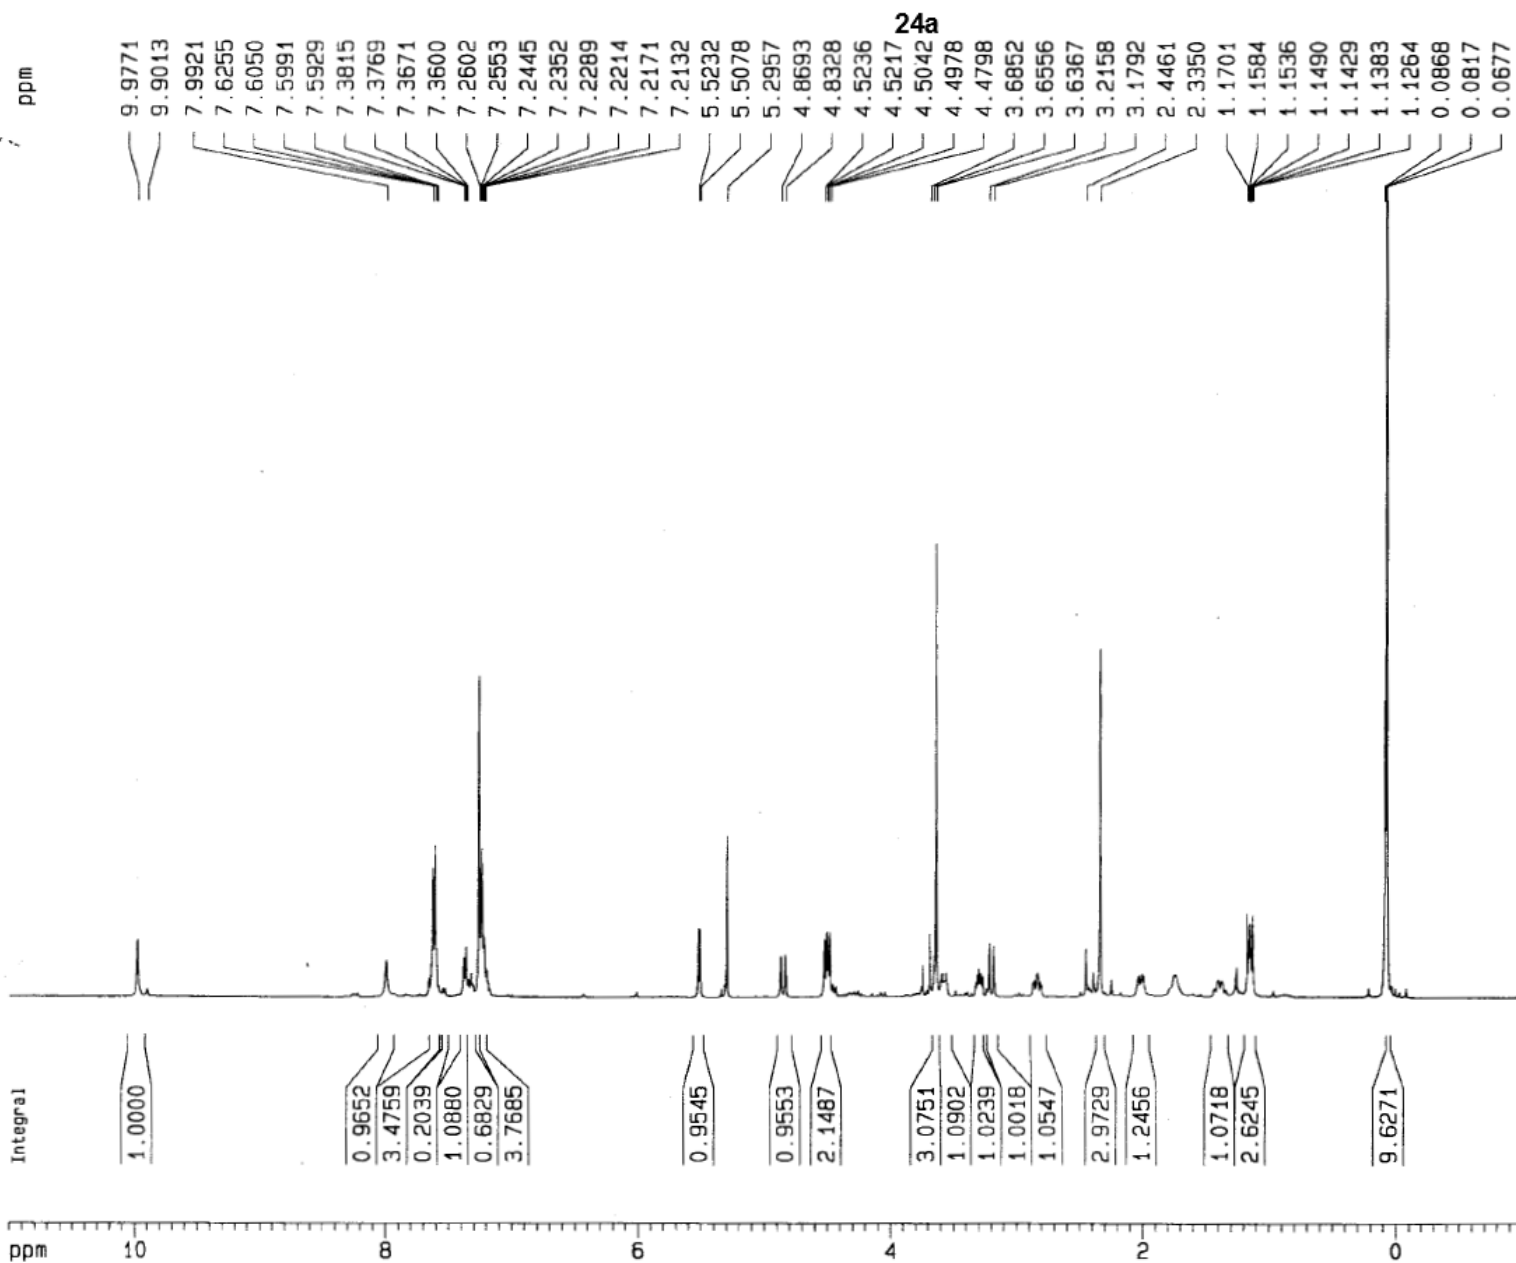

Current Data Parameters  
 NAME 092612FYG-11a  
 EXPNO 1  
 PROCNO 1

F2 - Acquisition Parameters  
 Date\_ 20120926  
 Time 9.02  
 INSTRUM spect  
 PROBHD 5 mm BBI 1H-  
 PULPROG zg30  
 TD 65536  
 SOLVENT CDCl3  
 NS 16  
 DS 2  
 SWH 8278.146 Hz  
 FIDRES 0.126314 Hz  
 AQ 3.9584243 sec  
 RG 322.5  
 DW 60.400 usec  
 DE 6.00 usec  
 TE 300.0 K  
 D1 1.00000000 sec

===== CHANNEL f1 =====  
 NUC1 1H  
 P1 6.45 usec  
 PL1 0.00 dB  
 SFO1 400.1324710 MHz

F2 - Processing parameters  
 SI 32768  
 SF 400.1300089 MHz  
 WDW EM  
 SSB 0  
 LB 0.30 Hz  
 GB 0  
 PC 1.00

1D NMR plot parameters  
 CX 20.00 cm  
 F1P 11.000 ppm  
 F1 4401.43 Hz  
 F2P -1.000 ppm  
 F2 -400.13 Hz  
 PPMCM 0.60000 ppm/cm  
 HZCM 240.07800 Hz/cm

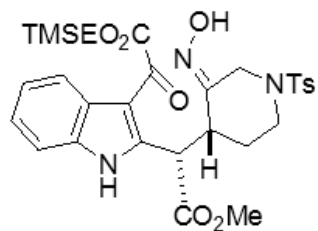

24a

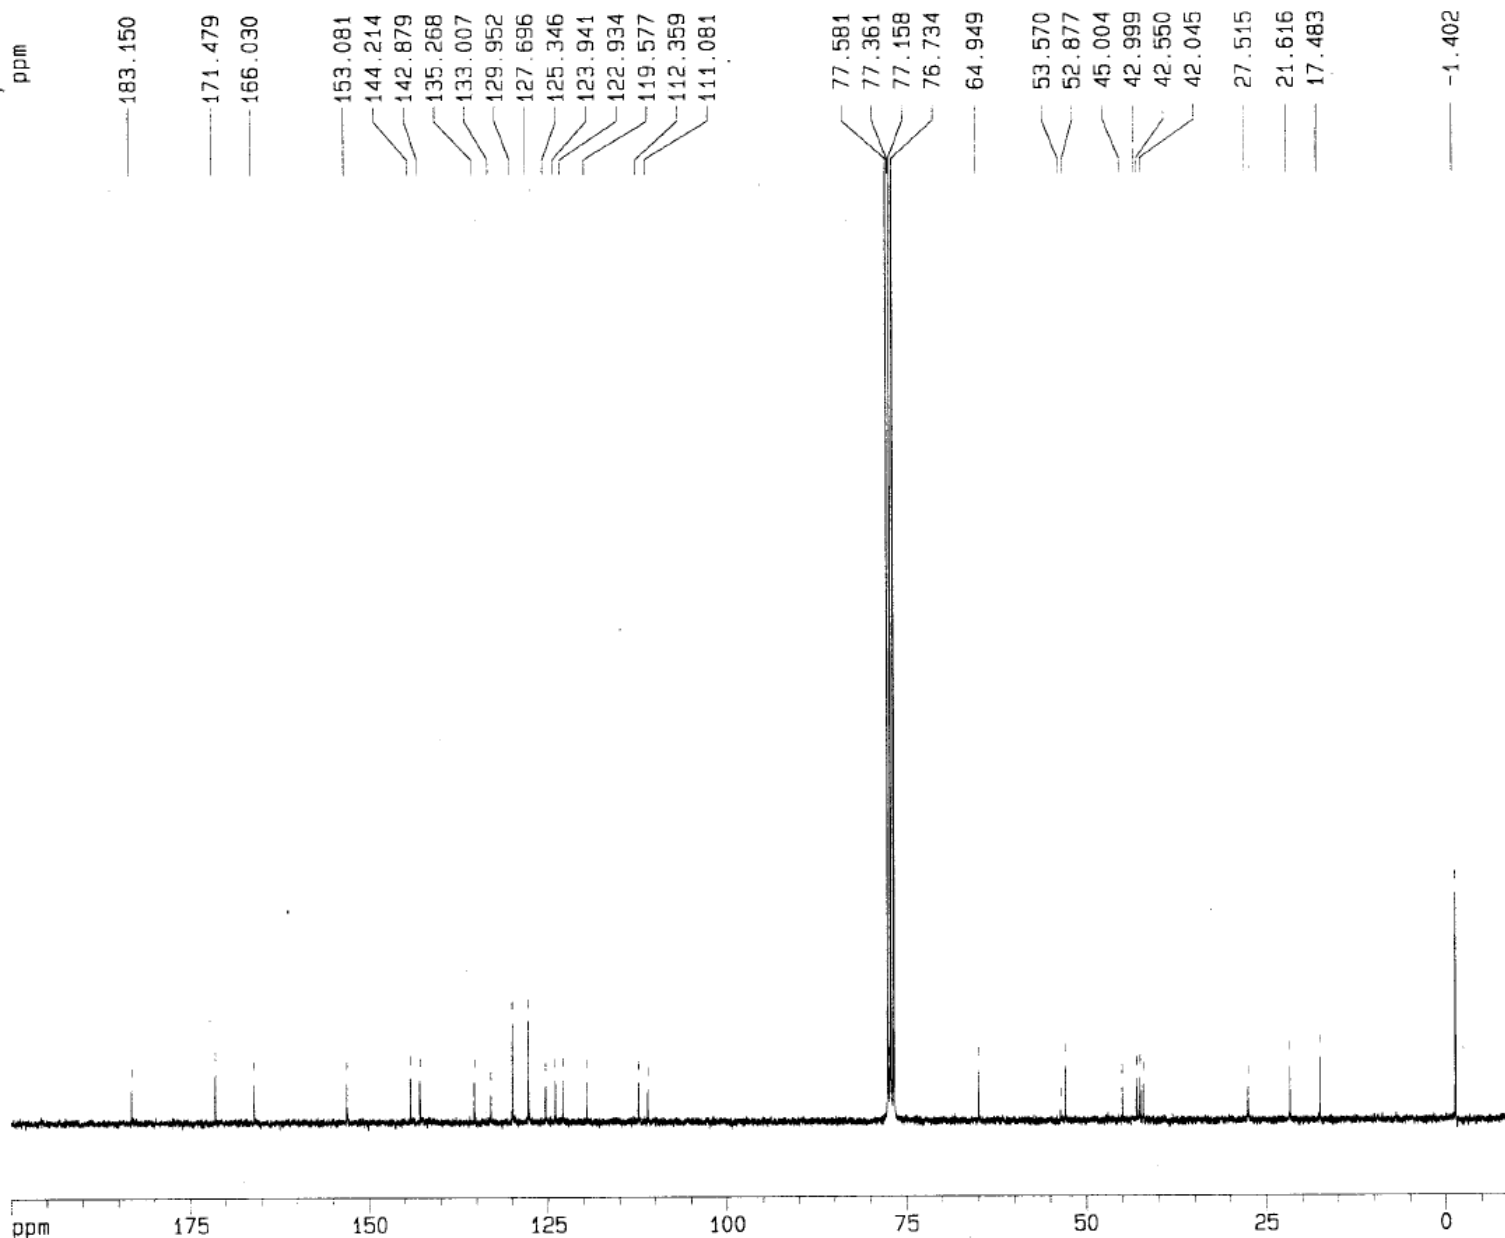

## Current Data Parameters

NAME 092512FYG-11a  
EXPNO 2  
PROCNO 1

## F2 - Acquisition Parameters

Date\_ 20120925  
Time 18.45  
INSTRUM spect  
PROBHD 5 mm Multinu  
PULPROG zgpg30  
TD 65536  
SOLVENT CDC13  
NS 3930  
DS 4  
SWH 18832.393 Hz  
FIDRES 0.287360 Hz  
AQ 1.7400308 sec  
RG 16384  
DW 26.550 usec  
DE 6.00 usec  
TE 300.0 K  
D1 2.0000000 sec  
d11 0.0300000 sec  
d12 0.0002000 sec

===== CHANNEL f1 =====  
NUC1 13C  
P1 9.75 usec  
PL1 0.00 dB  
SF01 75.4760200 MHz

===== CHANNEL f2 =====  
CPDPRG2 waltz16  
NUC2 1H  
PCPD2 110.00 usec  
PL2 0.00 dB  
PL12 17.50 dB  
PL13 17.50 dB  
SF02 300.1312005 MHz

## F2 - Processing parameters

S1 32768  
SF 75.4677399 MHz  
WDM EM  
SSB 0  
LB 1.00 Hz  
GB 0  
PC 1.40

## 1D NMR plot parameters

CX 20.00 cm  
F1P 200.000 ppm  
F1 15093.55 Hz  
F2P -10.000 ppm  
F2 -754.68 Hz  
PPMCM 10.50000 ppm/cm  
HZCM 792.41132 Hz/cm

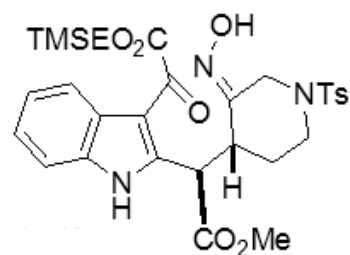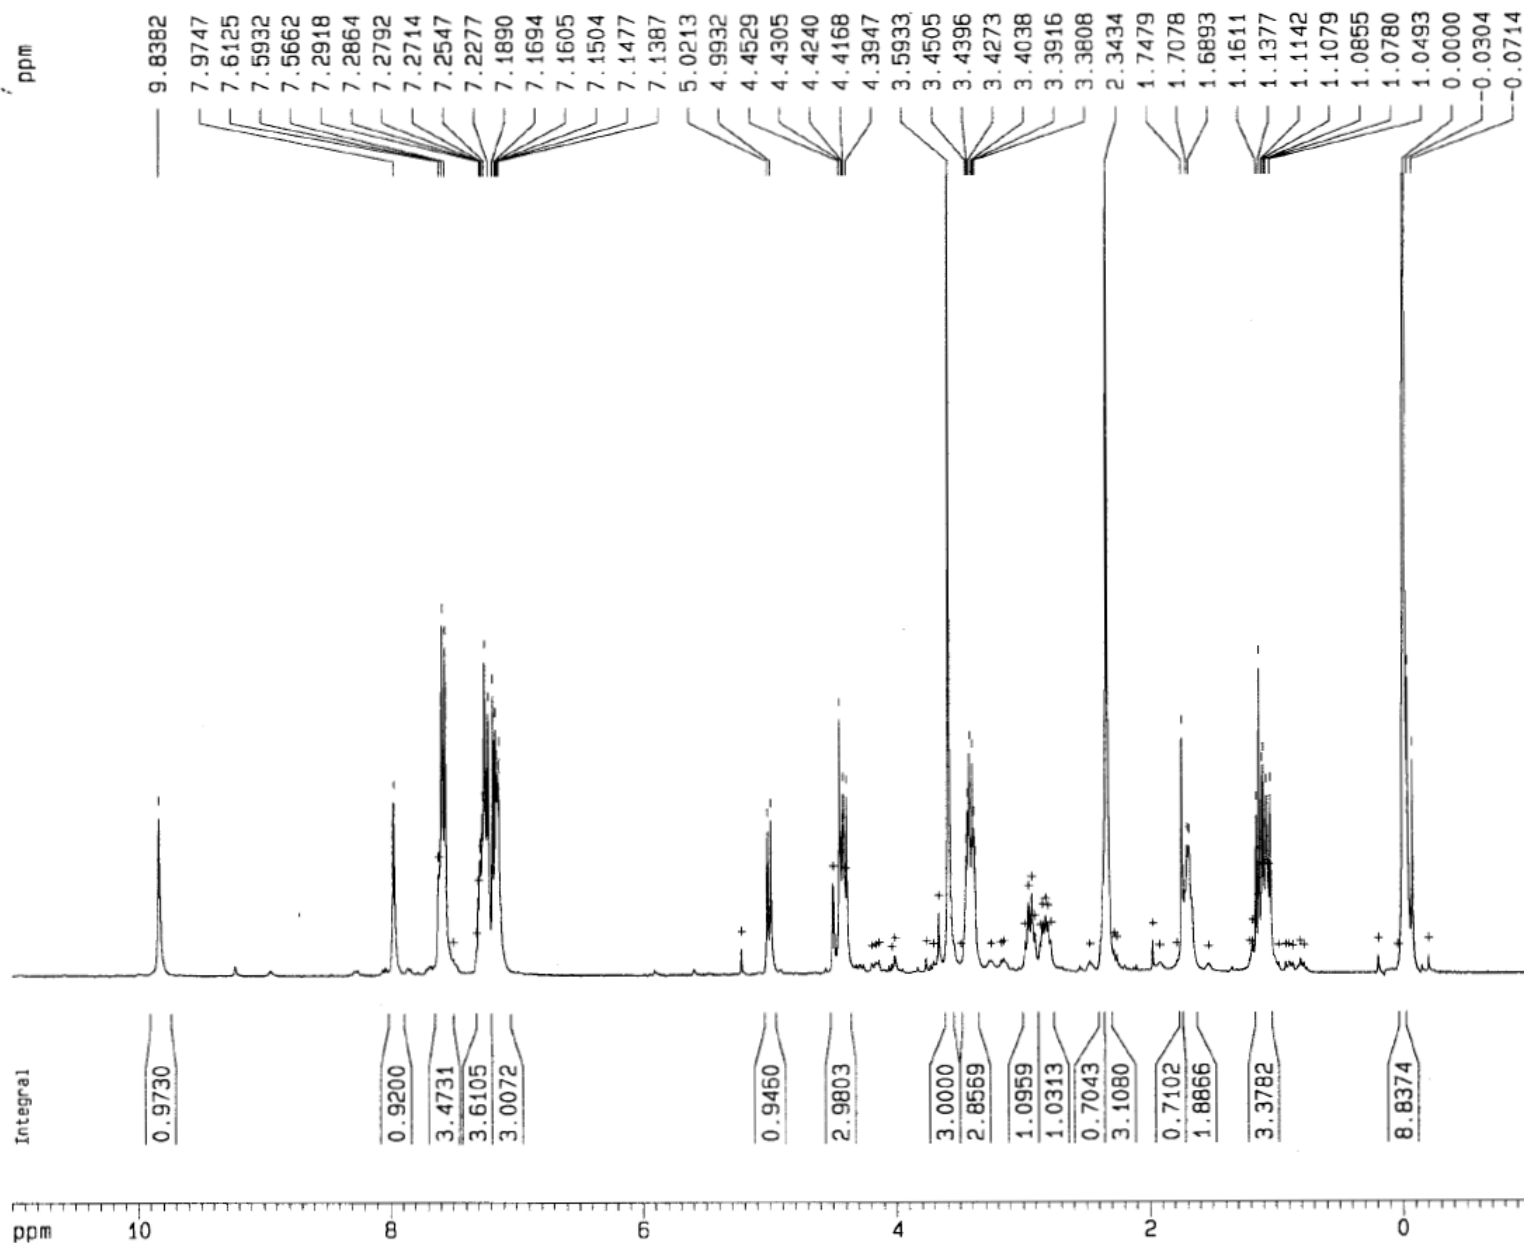

Current Data Parameters  
NAME 033111FYQI-NAM  
EXPNO 2  
PROCNO 1

F2 - Acquisition Parameters  
Date\_ 20110331  
Time 15.24  
INSTRUM spect  
PROBHD 5 mm Multinu  
PULPROG zg30  
TD 65536  
SOLVENT CDC13  
NS 16  
DS 2  
SWH 6172.839 Hz  
FIDRES 0.094190 Hz  
AQ 5.3084660 sec  
RG 322.5  
DW 81.000 usec  
DE 6.00 usec  
TE 300.0 K  
D1 1.00000000 sec

===== CHANNEL f1 =====  
NUC1 1H  
P1 9.60 usec  
PL1 -6.00 dB  
SF01 300.1318534 MHz

F2 - Processing parameters  
SI 32768  
SF 300.1300277 MHz  
WDW EM  
SSB 0  
LB 0.30 Hz  
GB 0  
PC 1.00

1D NMR plot parameters  
CX 20.00 cm  
F1P 11.000 ppm  
F1 3301.43 Hz  
F2P -1.000 ppm  
F2 -300.13 Hz  
PPMCM 0.60000 ppm/cm  
HZCM 180.07802 Hz/cm



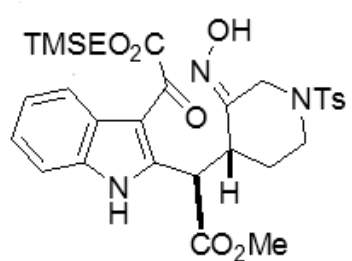

24b

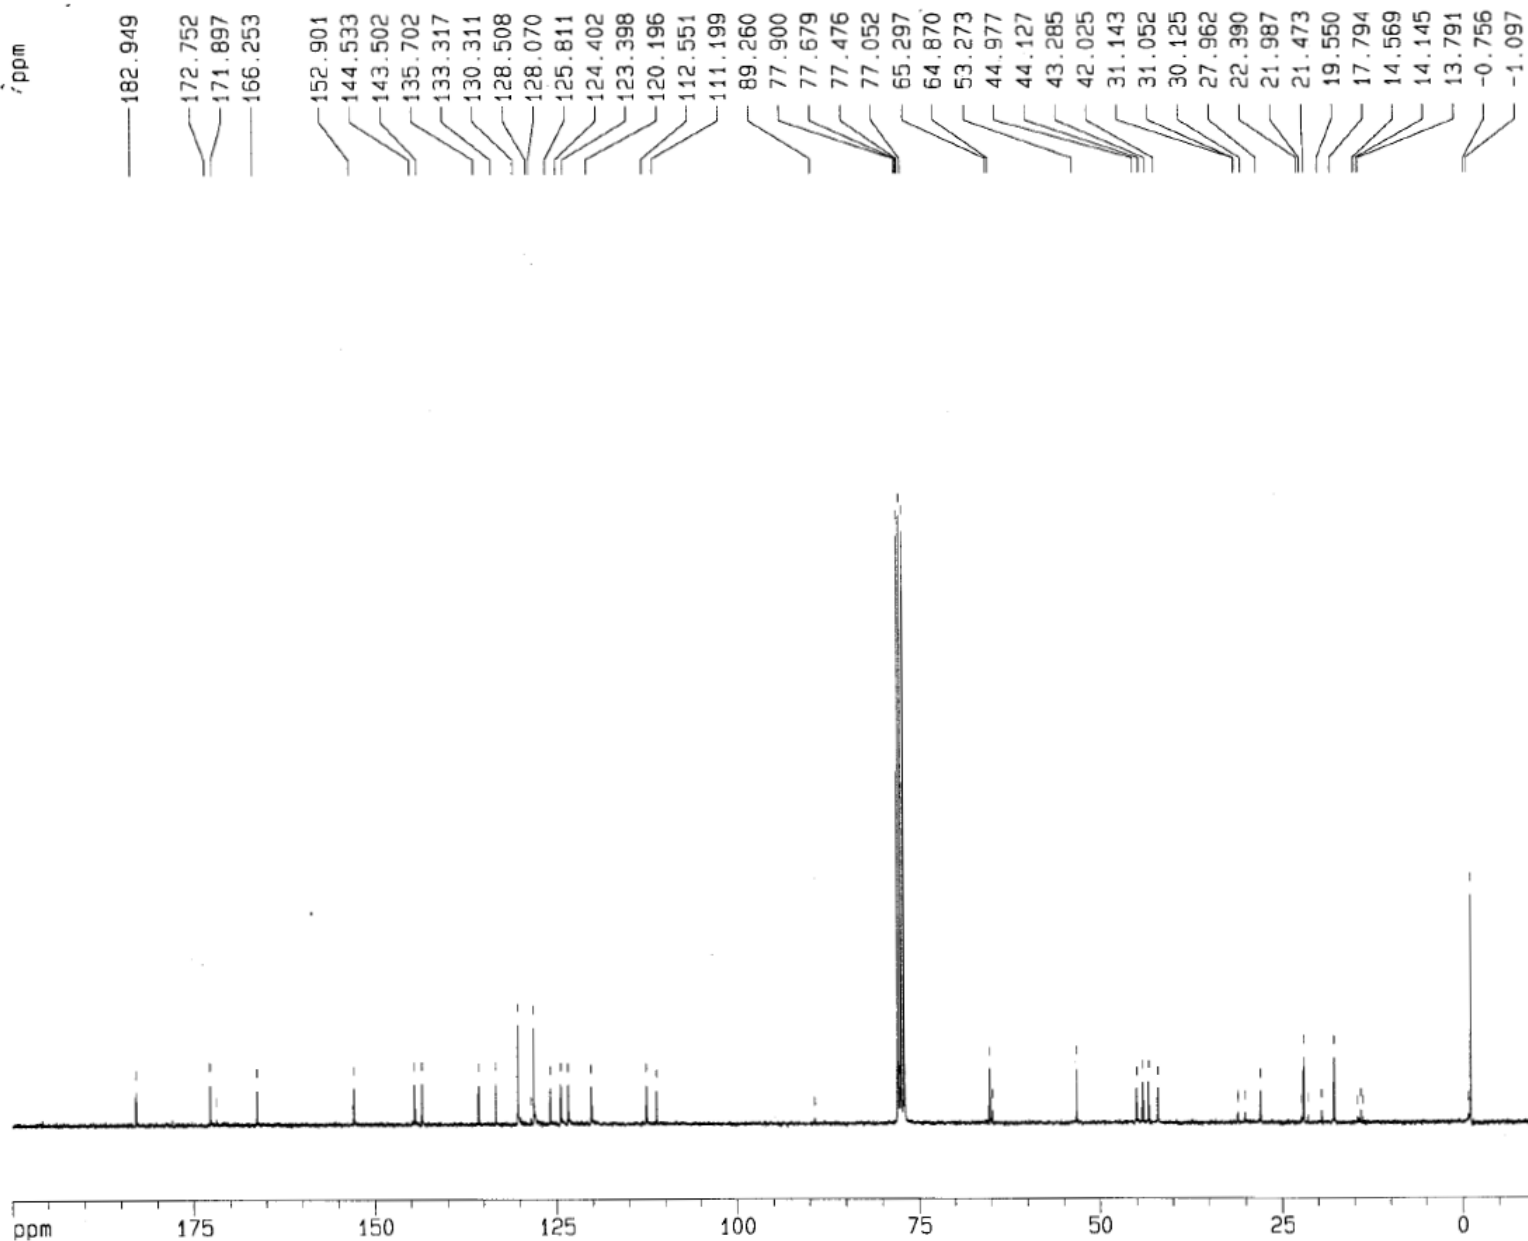

## Current Data Parameters

NAME 092412FYG-11b  
EXPNO 2  
PROCNO 1

## F2 - Acquisition Parameters

Date\_ 20120924  
Time 23.14  
INSTRUM spect  
PROBHD 5 mm QNP 1H/1  
PULPROG zgpg30  
TD 65536  
SOLVENT CDCl3  
NS 3584  
DS 4  
SWH 18796.992 Hz  
FIDRES 0.286819 Hz  
AQ 1.7433076 sec  
RG 2048  
DW 26.600 usec  
DE 6.00 usec  
TE 300.0 K  
D1 2.00000000 sec  
D11 0.03000000 sec  
D12 0.00002000 sec

===== CHANNEL f1 =====  
NUC1 13C  
P1 5.25 usec  
PL1 -6.00 dB  
SF01 75.4106357 MHz

===== CHANNEL f2 =====  
CPDPRG2 waltz16  
NUC2 1H  
PCPD2 115.00 usec  
PL2 0.00 dB  
PL12 19.70 dB  
PL13 19.70 dB  
SF02 299.8711995 MHz

## F2 - Processing parameters

SI 32768  
SF 75.4023410 MHz  
WDW EM  
SSB 0  
LB 1.00 Hz  
GB 0  
PC 1.40

## 1D NMR plot parameters

CX 20.00 cm  
F1P 200.000 ppm  
F1 15080.47 Hz  
F2P -10.000 ppm  
F2 -754.02 Hz  
PPMCM 10.50000 ppm/cm  
HZCM 791.72461 Hz/cm

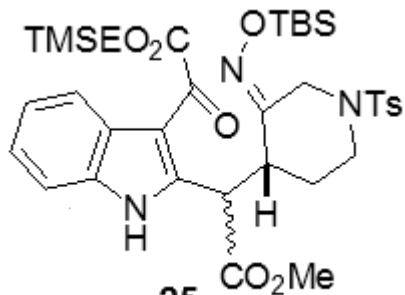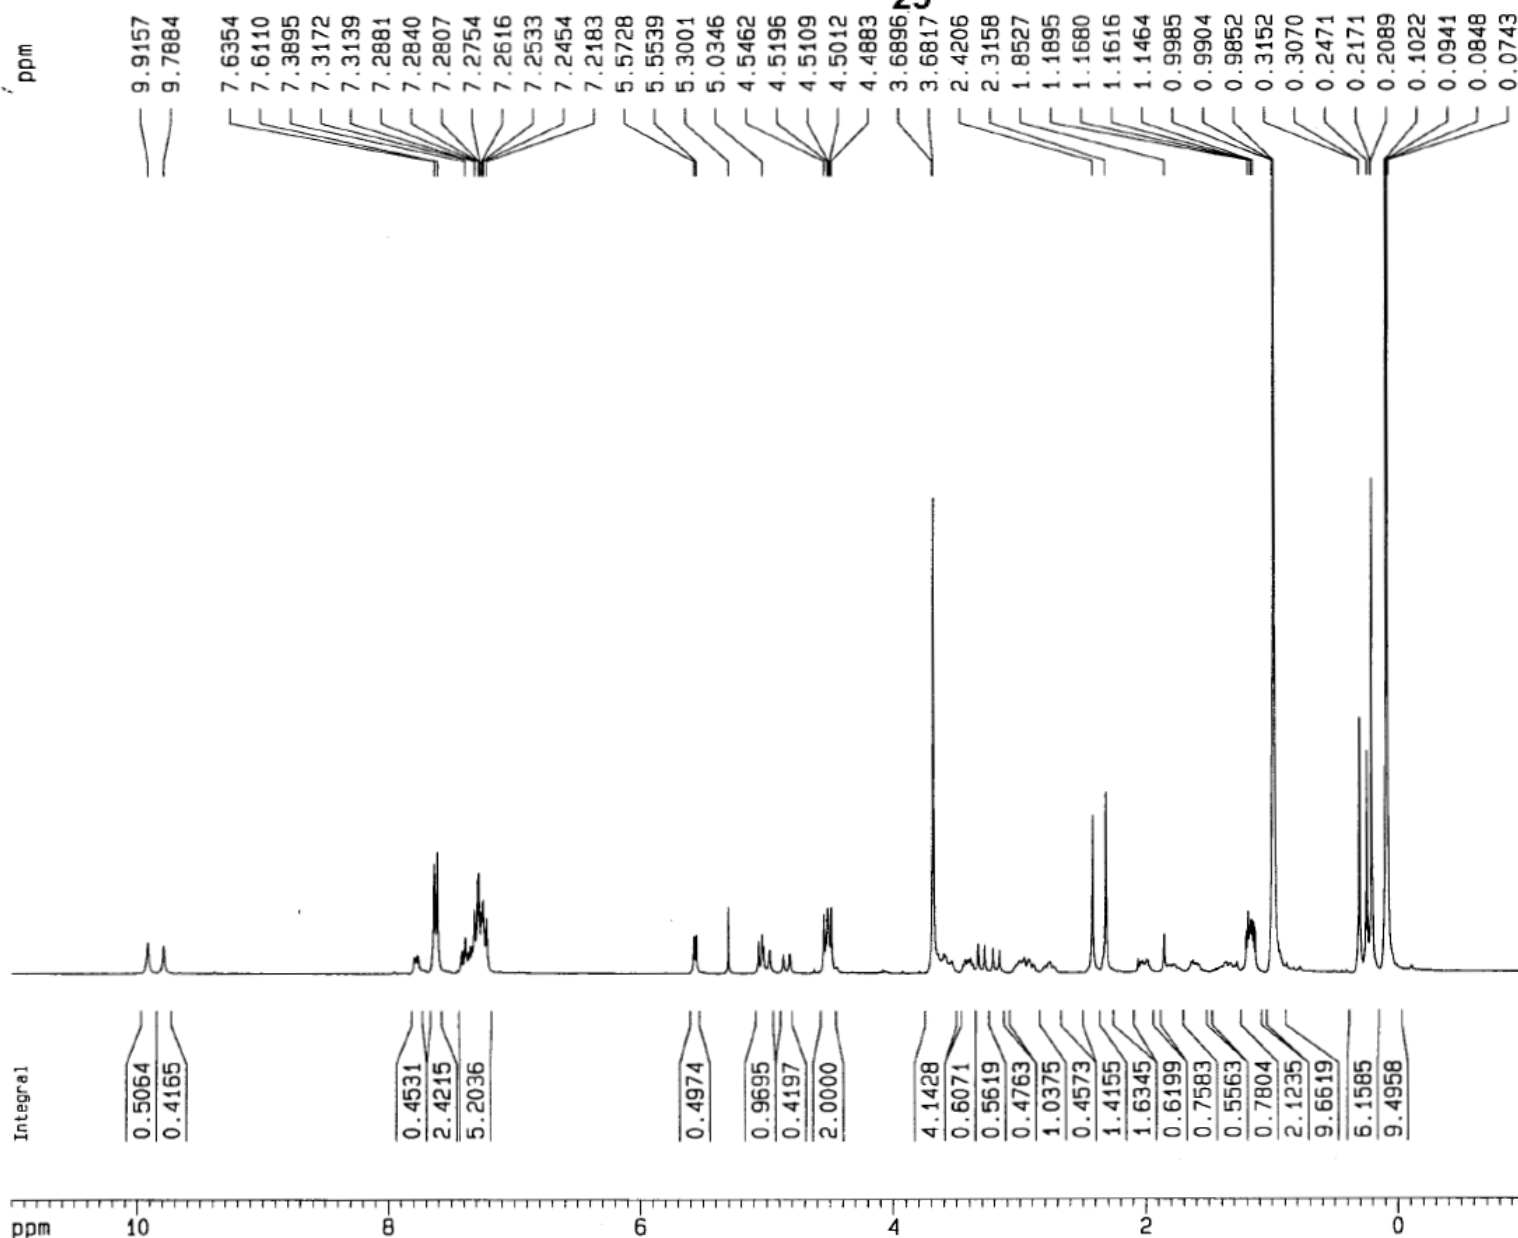

Current Data Parameters  
 NAME 043010  
 EXPNO 1  
 PROCNO 1

F2 - Acquisition Parameters  
 Date\_ 20100430  
 Time 15.47  
 INSTRUM spect  
 PROBHD 5 mm Multinu  
 PULPROG zg30  
 TD 24590  
 SOLVENT CDC13  
 NS 8  
 DS 2  
 SWH 6172.839 Hz  
 FIDRES 0.250014 Hz  
 AQ 1.9999400 sec  
 RG 114  
 DW 81.000 usec  
 DE 6.00 usec  
 TE 300.0 K  
 D1 1.00000000 sec

===== CHANNEL f1 =====  
 NUC1 1H  
 P1 9.50 usec  
 PL1 -6.00 dB  
 SFO1 300.1318534 MHz

F2 - Processing parameters  
 SI 32768  
 SF 300.1300000 MHz  
 WDW no  
 SSB 0  
 LB 0.00 Hz  
 GB 0  
 PC 1.00

1D NMR plot parameters  
 CX 20.00 cm  
 F1P 11.000 ppm  
 F1 3301.43 Hz  
 F2P -1.000 ppm  
 F2 -300.13 Hz  
 PPMCM 0.60000 ppm/cm  
 HZCM 180.07800 Hz/cm

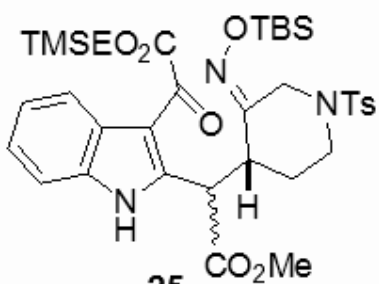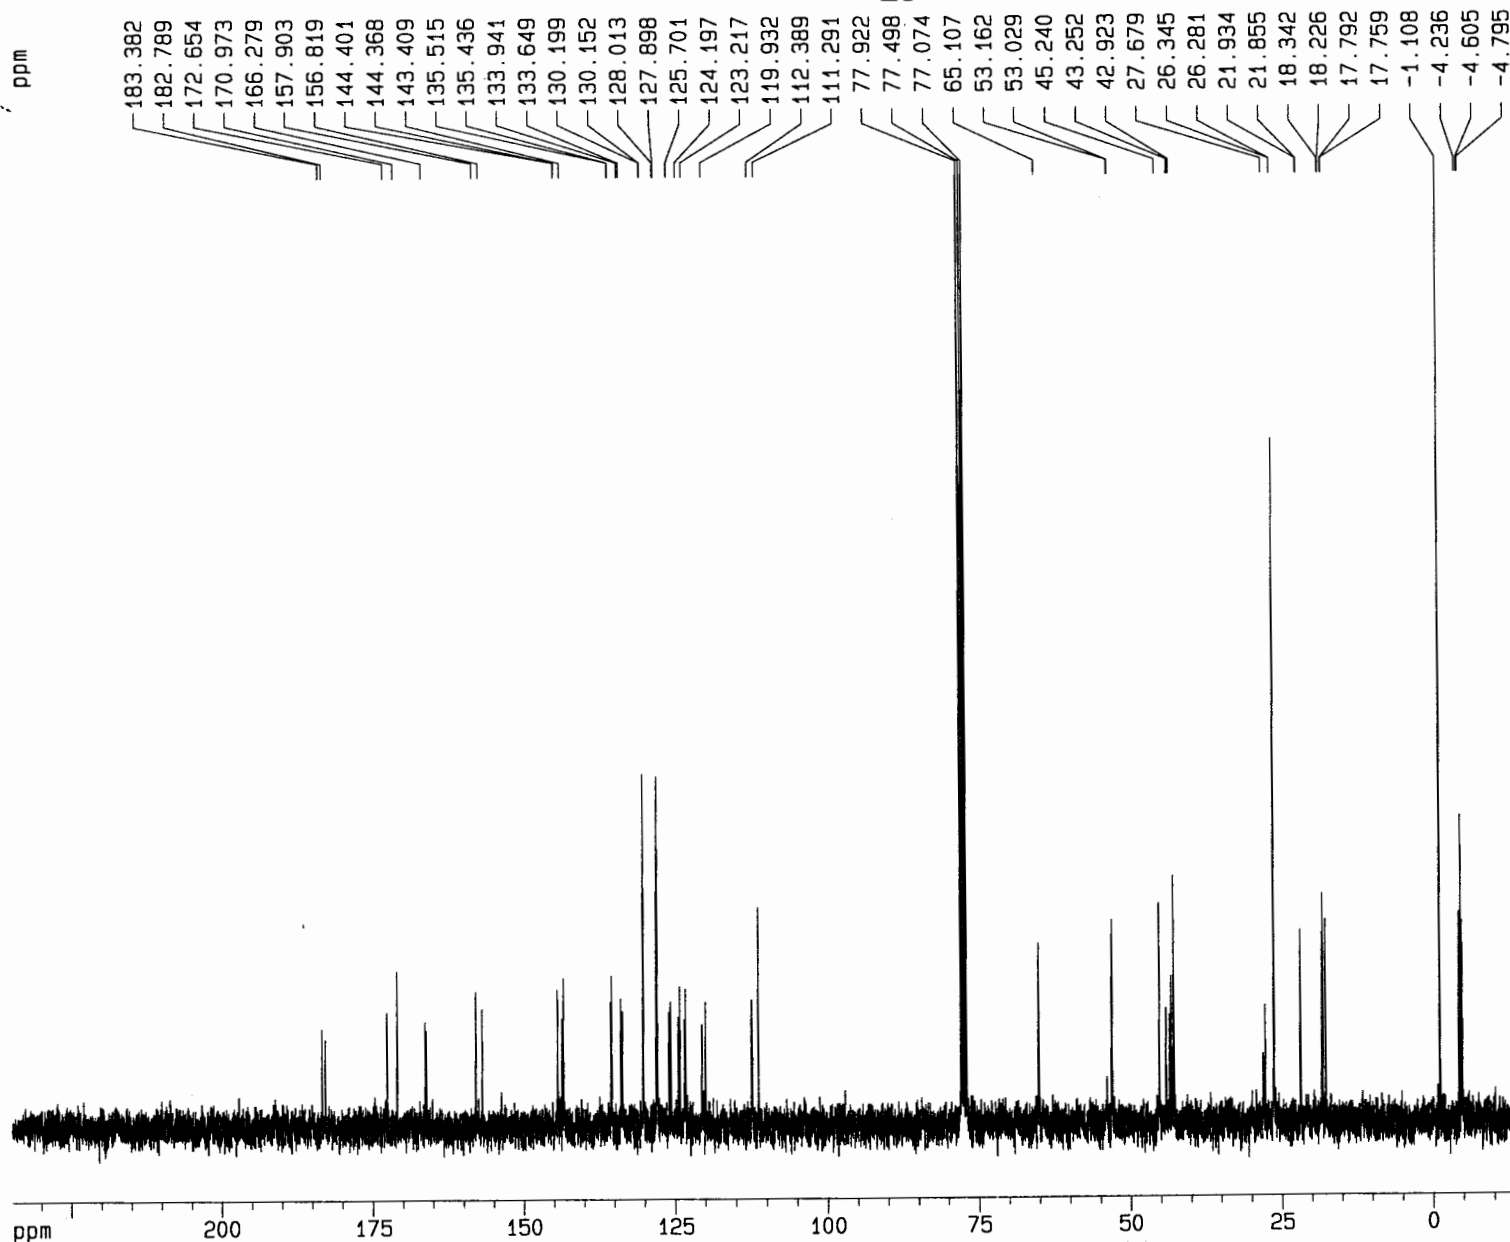

Current Data Parameters  
 NAME 043010  
 EXPNO 2  
 PROCNO 1

## F2 - Acquisition Parameters

Date\_ 20100430  
 Time 15.56  
 INSTRUM spect  
 PROBHD 5 mm Multinu  
 PULPROG zgpg30  
 TD 32768  
 SOLVENT CDCl3  
 NS 500  
 DS 4  
 SMH 18832.393 Hz  
 FIDRES 0.574719 Hz  
 AQ 0.8700404 sec  
 RG 16384  
 DW 26.550 usec  
 DE 6.00 usec  
 TE 300.0 K  
 D1 2.00000000 sec  
 d11 0.03000000 sec  
 d12 0.00002000 sec

===== CHANNEL f1 =====  
 NUC1 13C  
 P1 11.80 usec  
 PL1 0.00 dB  
 SF01 75.4760200 MHz

===== CHANNEL f2 =====  
 CPDPRG2 waltz16  
 NUC2 1H  
 PCPD2 110.00 usec  
 PL2 0.00 dB  
 PL12 17.50 dB  
 PL13 17.50 dB  
 SF02 300.1312005 MHz

F2 - Processing parameters  
 SI 32768  
 SF 75.4677190 MHz  
 WDM EM  
 SSB 0  
 LB 1.00 Hz  
 GB 0  
 PC 1.40

## 1D NMR plot parameters

CX 20.00 cm  
 F1P 234.765 ppm  
 F1 17717.16 Hz  
 F2P -14.778 ppm  
 F2 -1115.24 Hz  
 PPMCM 12.47712 ppm/cm  
 HZCM 941.61963 Hz/cm

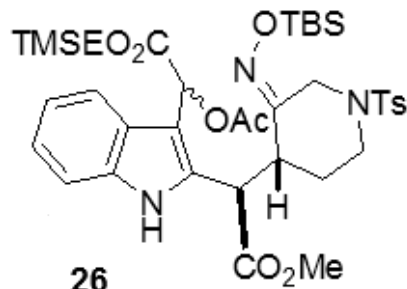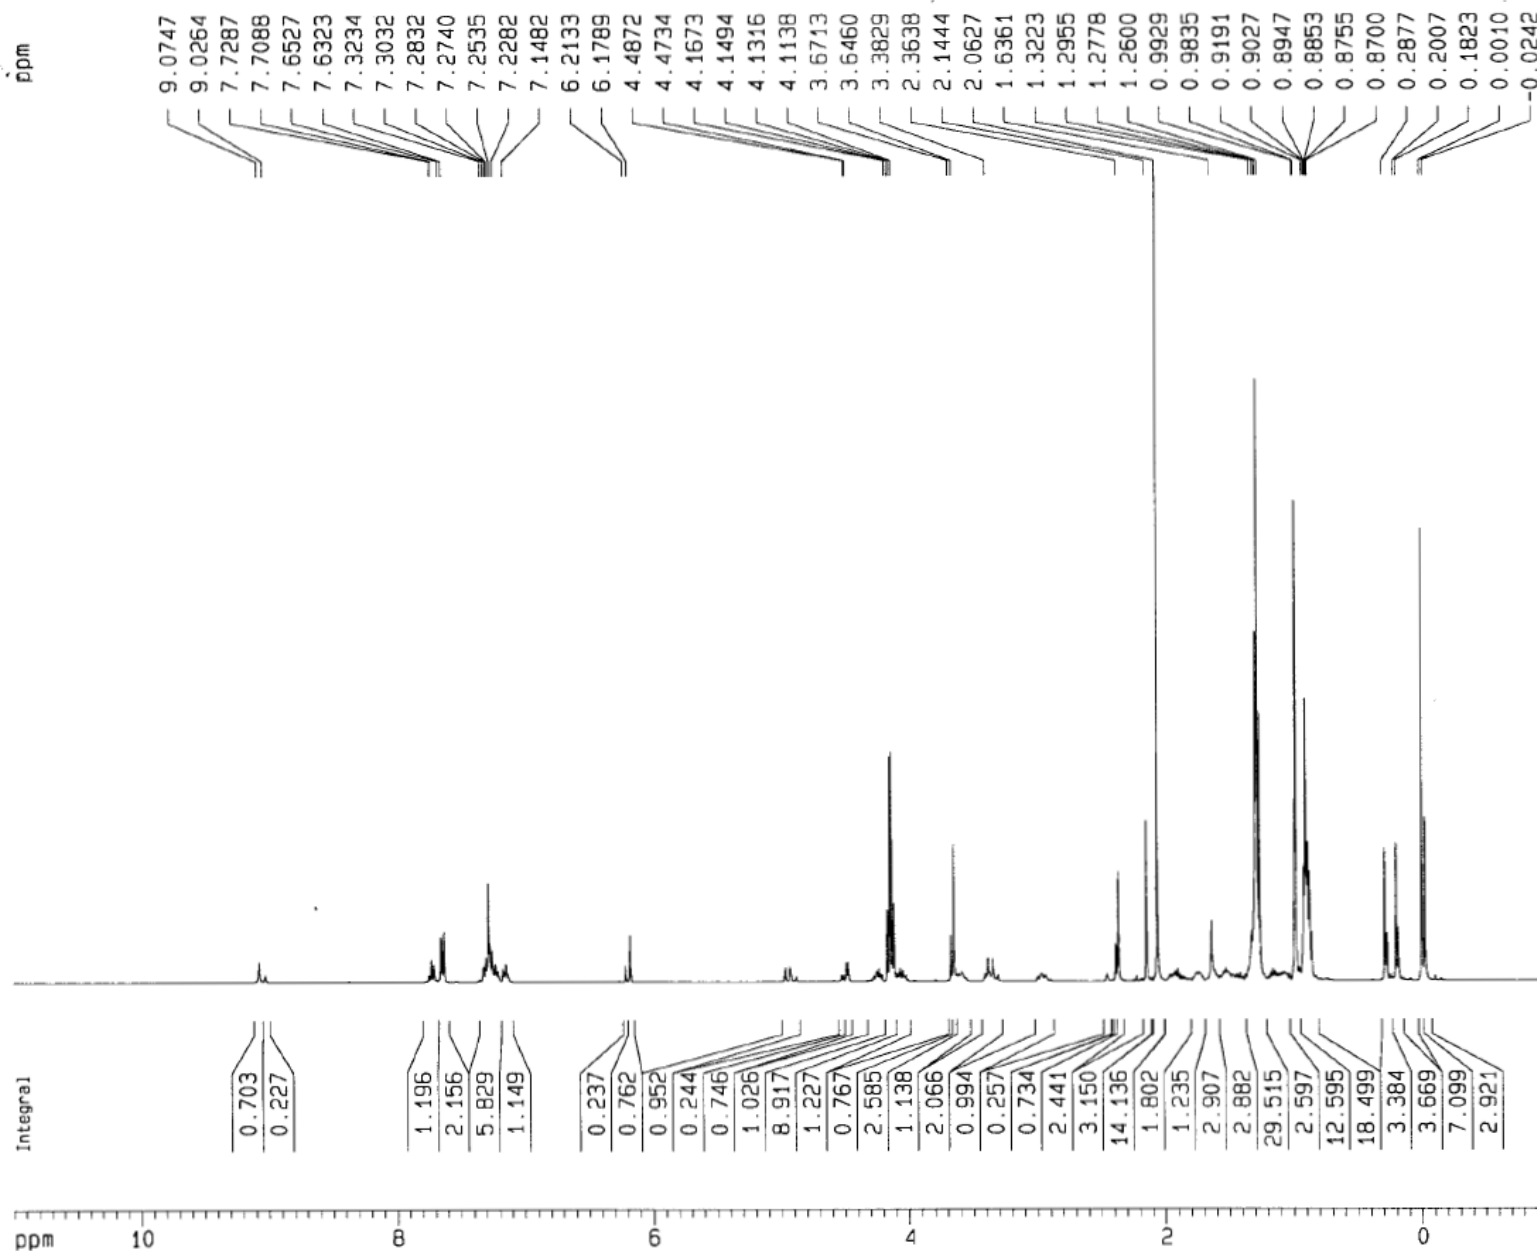

Current Data Parameters  
 NAME 012710nm4284  
 EXPNO 2  
 PROCNO 1

F2 - Acquisition Parameters  
 Date\_ 20100127  
 Time 10.11  
 INSTRUM spect  
 PROBHD 5 mm BBI 1H-B  
 PULPROG zg30  
 TD 33110  
 SOLVENT CDCl3  
 NS 16  
 DS 2  
 SWH 8278.146 Hz  
 FIDRES 0.250019 Hz  
 AQ 1.9998940 sec  
 RG 64  
 DW 60.400 usec  
 DE 6.00 usec  
 TE 300.0 K  
 D1 1.00000000 sec

===== CHANNEL f1 =====  
 NUC1 1H  
 P1 6.45 usec  
 PL1 0.00 dB  
 SFO1 400.1324710 MHz

F2 - Processing parameters  
 SI 32768  
 SF 400.1300000 MHz  
 WDW no  
 SSB 0  
 LB 0.00 Hz  
 GB 0  
 PC 1.00

1D NMR plot parameters  
 CX 20.00 cm  
 F1P 11.000 ppm  
 F1 4401.43 Hz  
 F2P -1.000 ppm  
 F2 -400.13 Hz  
 PPMCM 0.60000 ppm/cm  
 HZCM 240.07800 Hz/cm

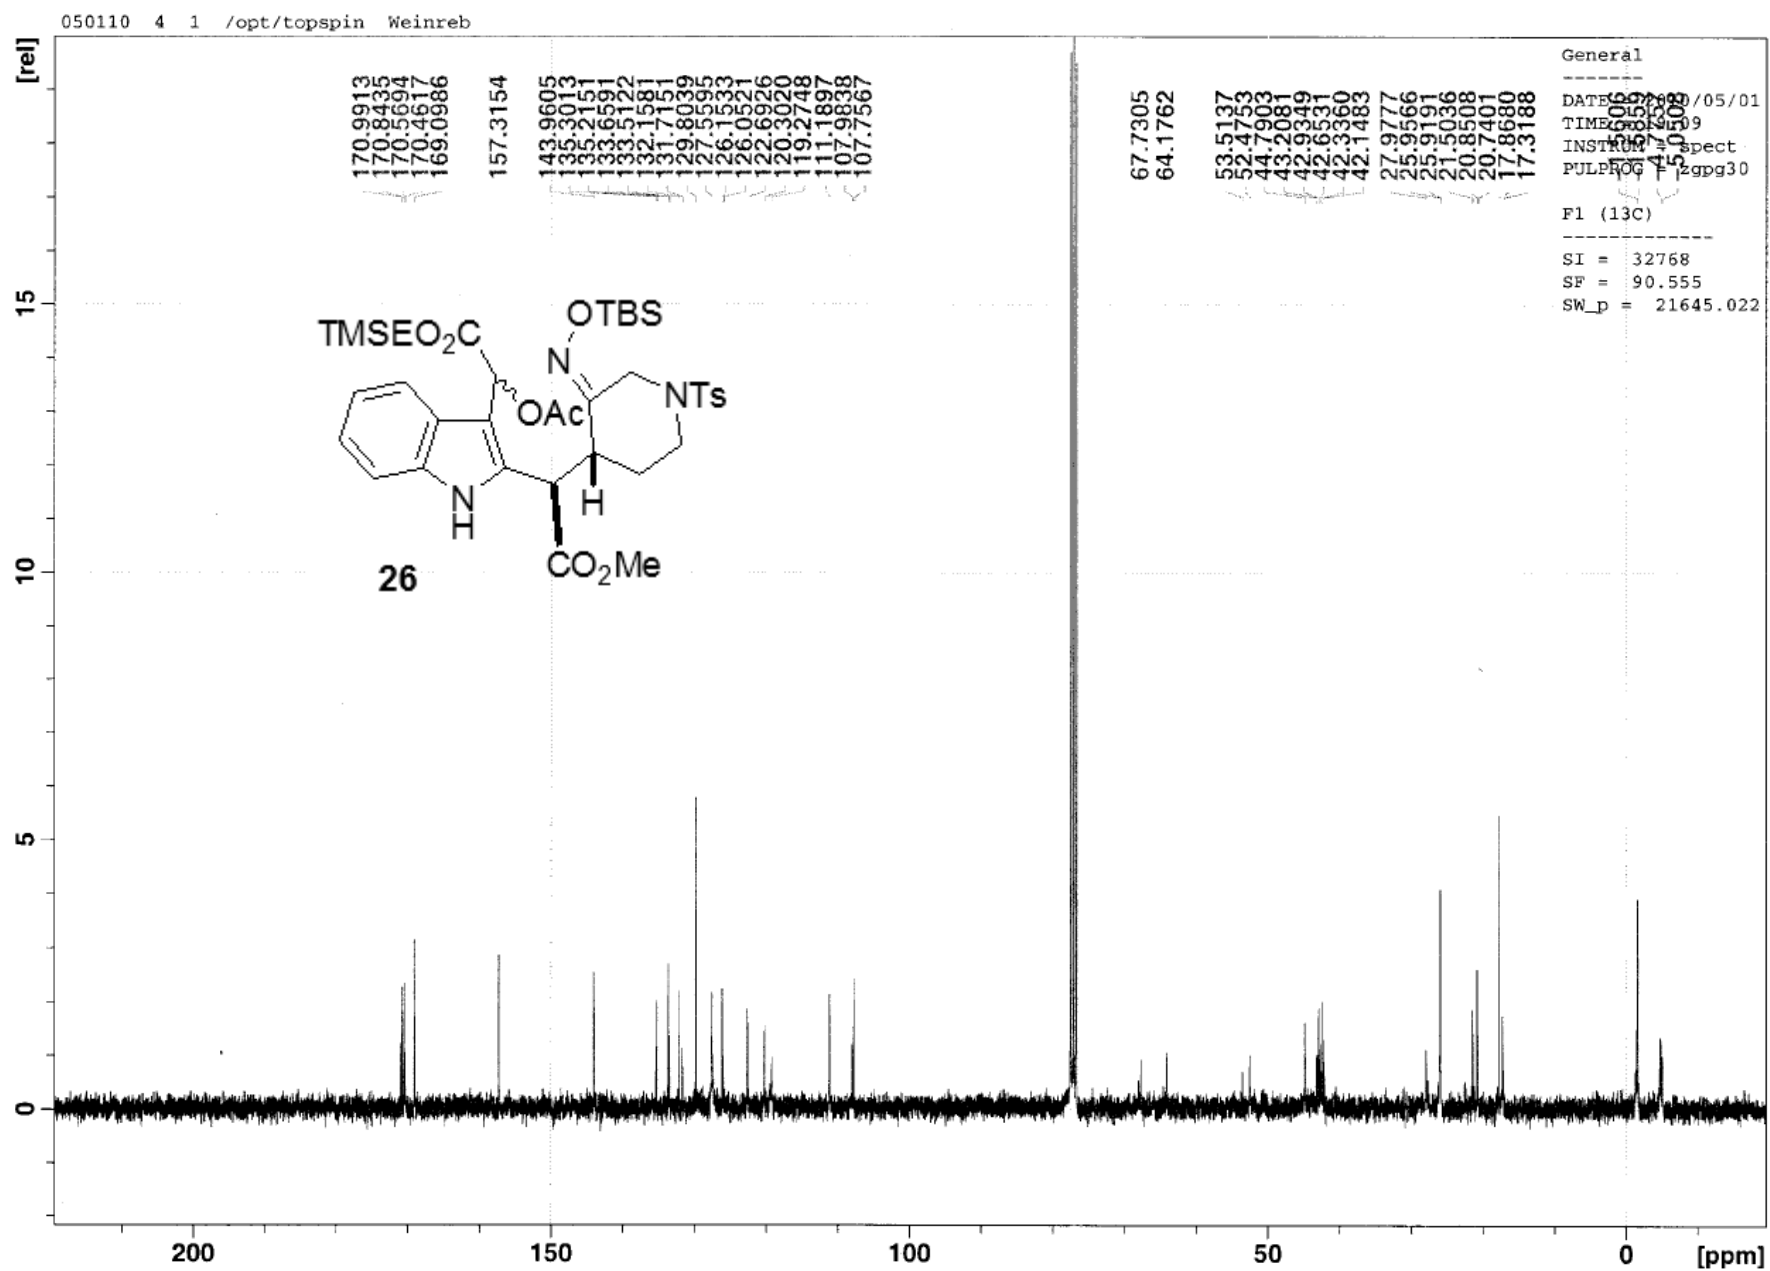

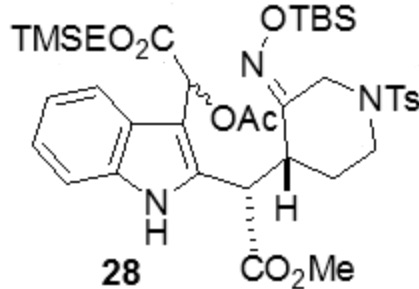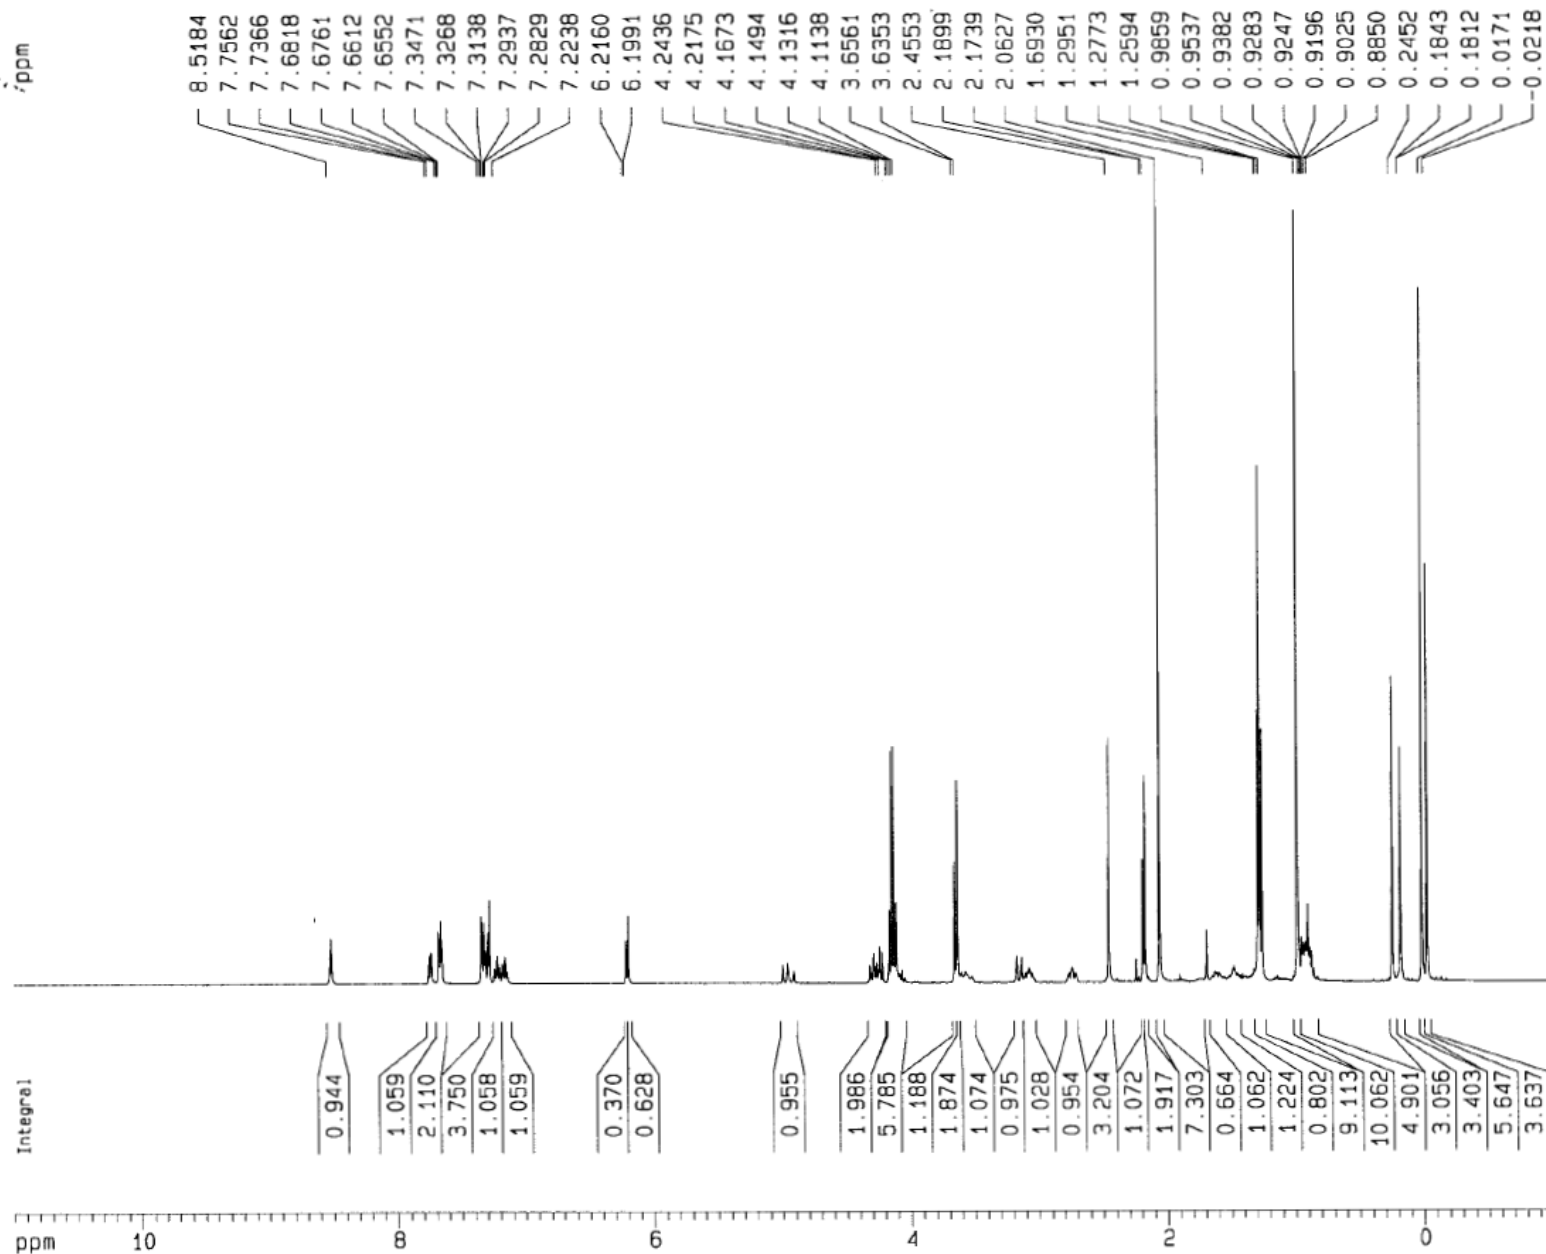

Current Data Parameters  
 NAME 012710mm4284  
 EXPNO 1  
 PROCNO 1

F2 - Acquisition Parameters  
 Date\_ 20100127  
 Time 10.05  
 INSTRUM spect  
 PROBH0 5 mm BBI 1H-B  
 PULPROG zg30  
 TD 33110  
 SOLVENT CDC13  
 NS 16  
 DS 2  
 SWH 8278.146 Hz  
 FIDRES 0.250019 Hz  
 AQ 1.9998940 sec  
 RG 57  
 DW 60.400 usec  
 DE 6.00 usec  
 TE 300.0 K  
 D1 1.00000000 sec

----- CHANNEL f1 -----  
 NUC1 1H  
 P1 6.45 usec  
 PL1 0.00 dB  
 SF01 400.1324710 MHz

F2 - Processing parameters  
 SI 32768  
 SF 400.1300000 MHz  
 WDW no  
 SSB 0  
 LB 0.00 Hz  
 GB 0  
 PC 1.00

1D NMR plot parameters  
 CX 20.00 cm  
 F1P 11.000 ppm  
 F1 4401.43 Hz  
 F2P -1.000 ppm  
 F2 -400.13 Hz  
 PPMCM 0.60000 ppm/cm  
 HZCM 240.07800 Hz/cm

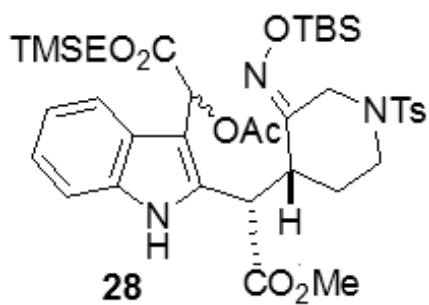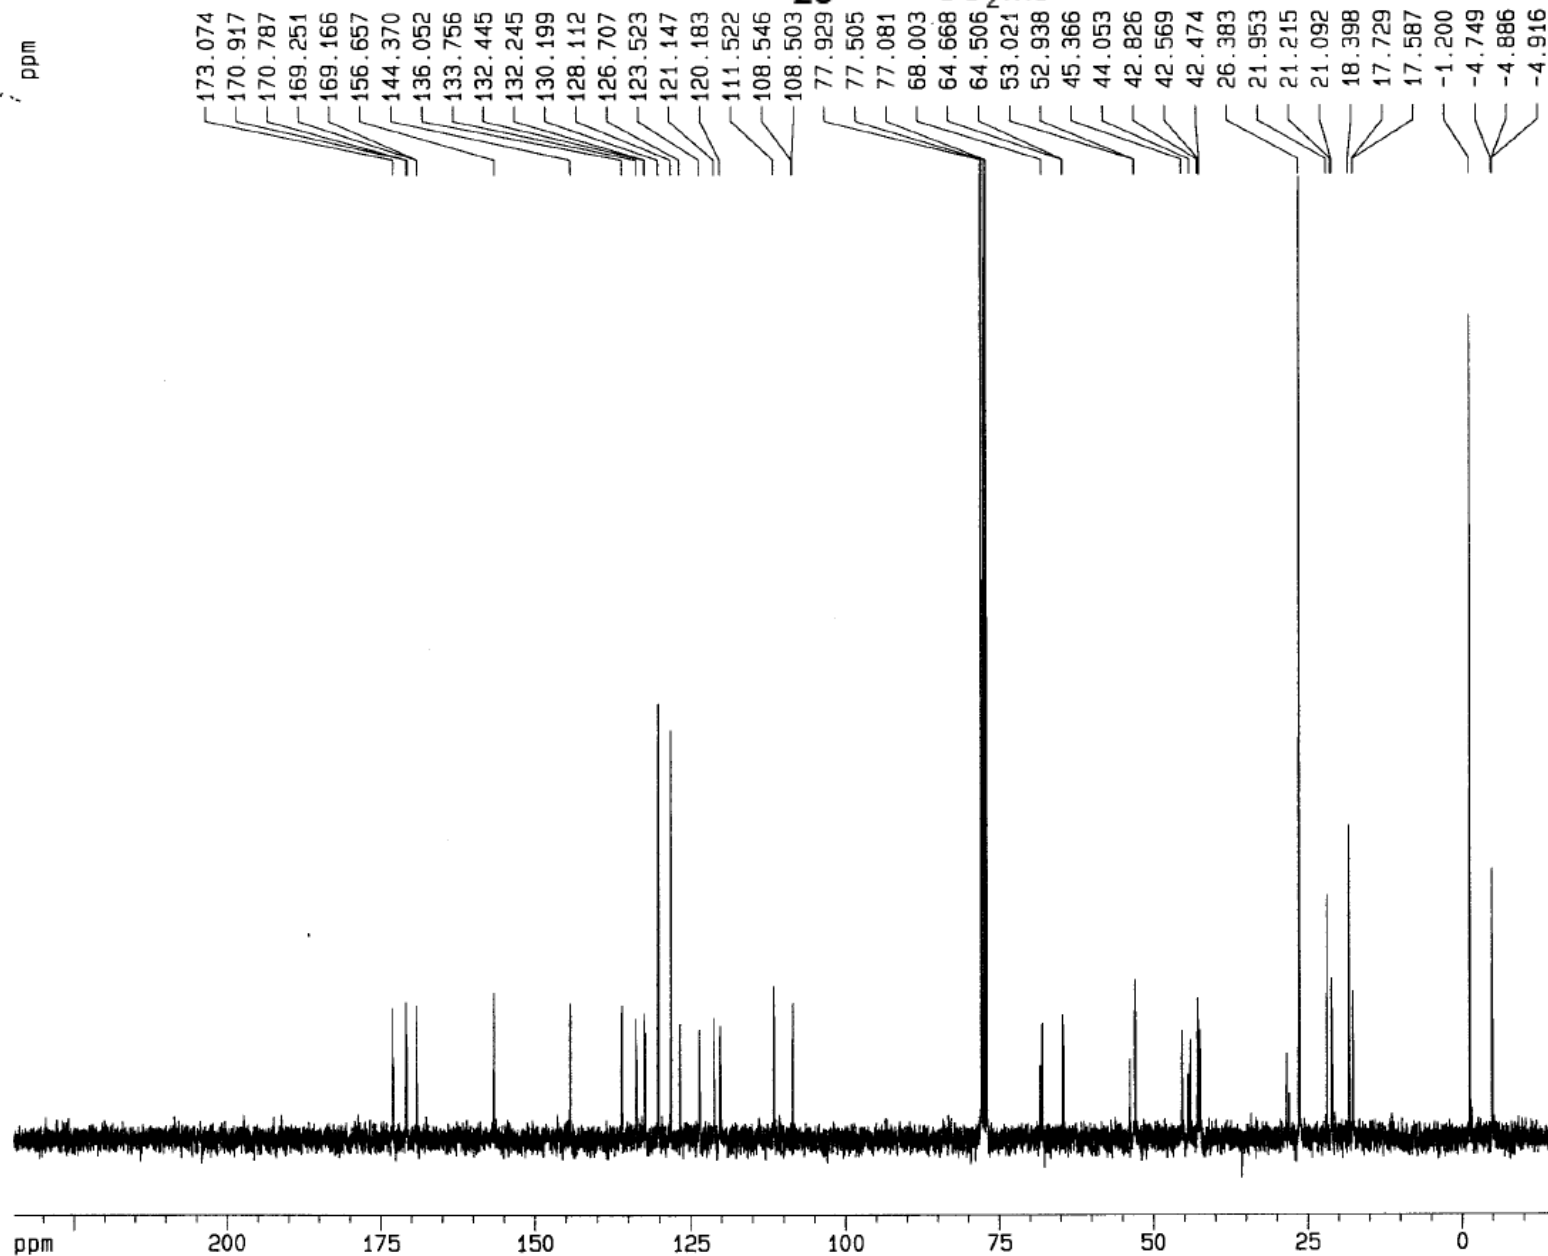

Current Data Parameters  
NAME 050110  
EXPNO 2  
PROCNO 1

F2 - Acquisition Parameters  
Date\_ 20100501  
Time 17.37  
INSTRUM spect  
PROBHD 5 mm Multinu  
PULPROG zgpg30  
TD 65536  
SOLVENT CDCl3  
NS 599  
DS 4  
SWH 18832.393 Hz  
FIDRES 0.287360 Hz  
AQ 1.7400308 sec  
RG 16384  
DW 26.550 usec  
DE 6.00 usec  
TE 300.0 K  
D1 2.00000000 sec  
d11 0.03000000 sec  
d12 0.00002000 sec

----- CHANNEL f1 -----  
NUC1 13C  
P1 11.80 usec  
PL1 0.00 dB  
SFO1 75.4760200 MHz

----- CHANNEL f2 -----  
CPDPRG2 waltz16  
NUC2 1H  
PCPD2 110.00 usec  
PL2 0.00 dB  
PL12 17.50 dB  
PL13 17.50 dB  
SFO2 300.1312005 MHz

F2 - Processing parameters  
SI 32768  
SF 75.4677190 MHz  
WDW EM  
SSB 0  
LB 1.00 Hz  
GB 0  
PC 1.40

1D NMR plot parameters  
CX 20.00 cm  
F1P 234.765 ppm  
F1 17717.16 Hz  
F2P -14.778 ppm  
F2 -1115.23 Hz  
PPMCM 12.47712 ppm/cm  
HZCM 941.61951 Hz/cm

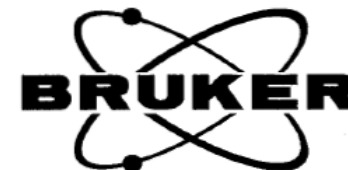

Current Data Parameters  
 NAME 092212FYQ-Compound13  
 EXPNO 1  
 PROCNO 1

F2 - Acquisition Parameters  
 Date\_ 20120922  
 Time 23.19  
 INSTRUM spect  
 PROBHD 5 mm QNP 1H/15  
 PULPROG zg30  
 TD 65536  
 SOLVENT CDC13  
 NS 16  
 DS 2  
 SWH 7440.476 Hz  
 FIDRES 0.113533 Hz  
 AQ 4.4040694 sec  
 RG 181  
 DW 67.200 usec  
 DE 6.00 usec  
 TE 295.7 K  
 D1 1.0000000 sec  
 TDO 1

===== CHANNEL f1 =====  
 NUC1 1H  
 P1 14.93 usec  
 PL1 -3.00 dB  
 SFO1 360.1322240 MHz

F2 - Processing parameters  
 SI 32768  
 SF 360.1300145 MHz  
 WDW EM  
 SSB 0  
 LB 0.30 Hz  
 GB 0  
 PC 1.00

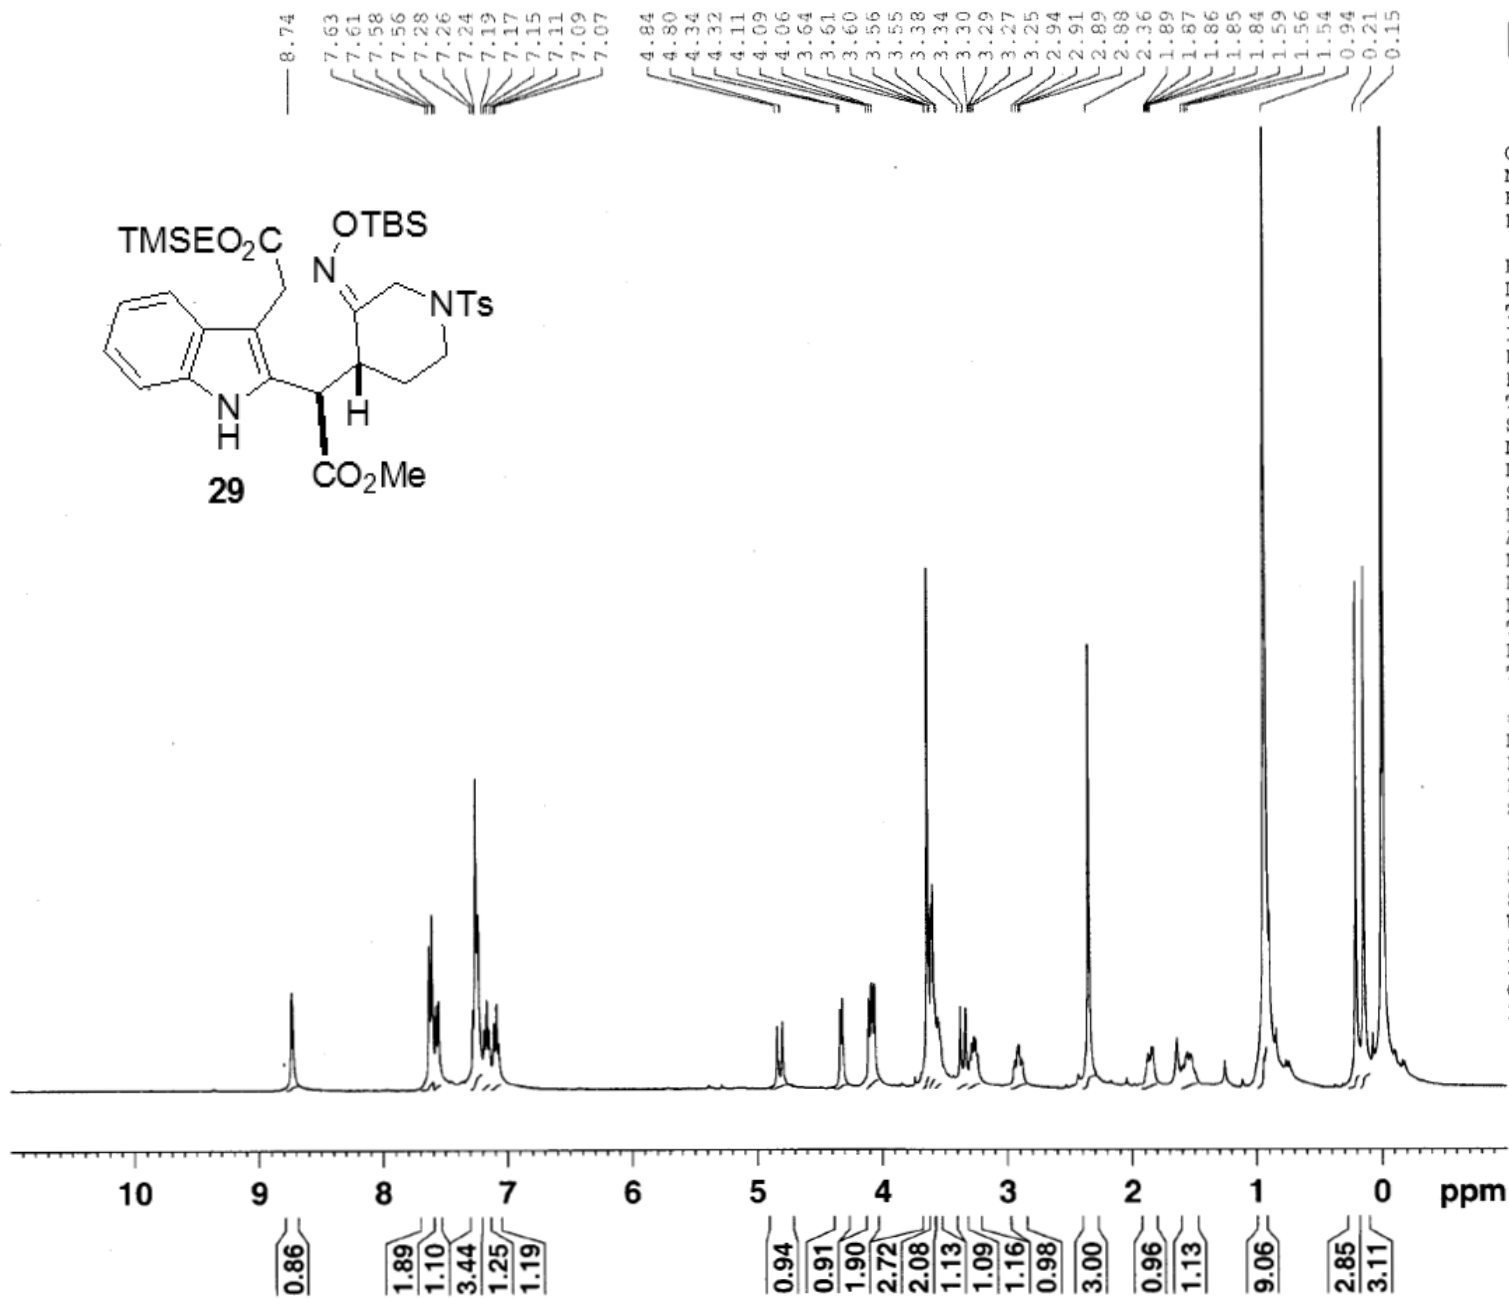



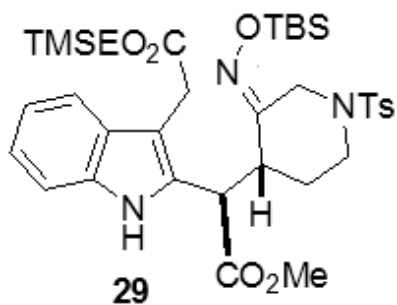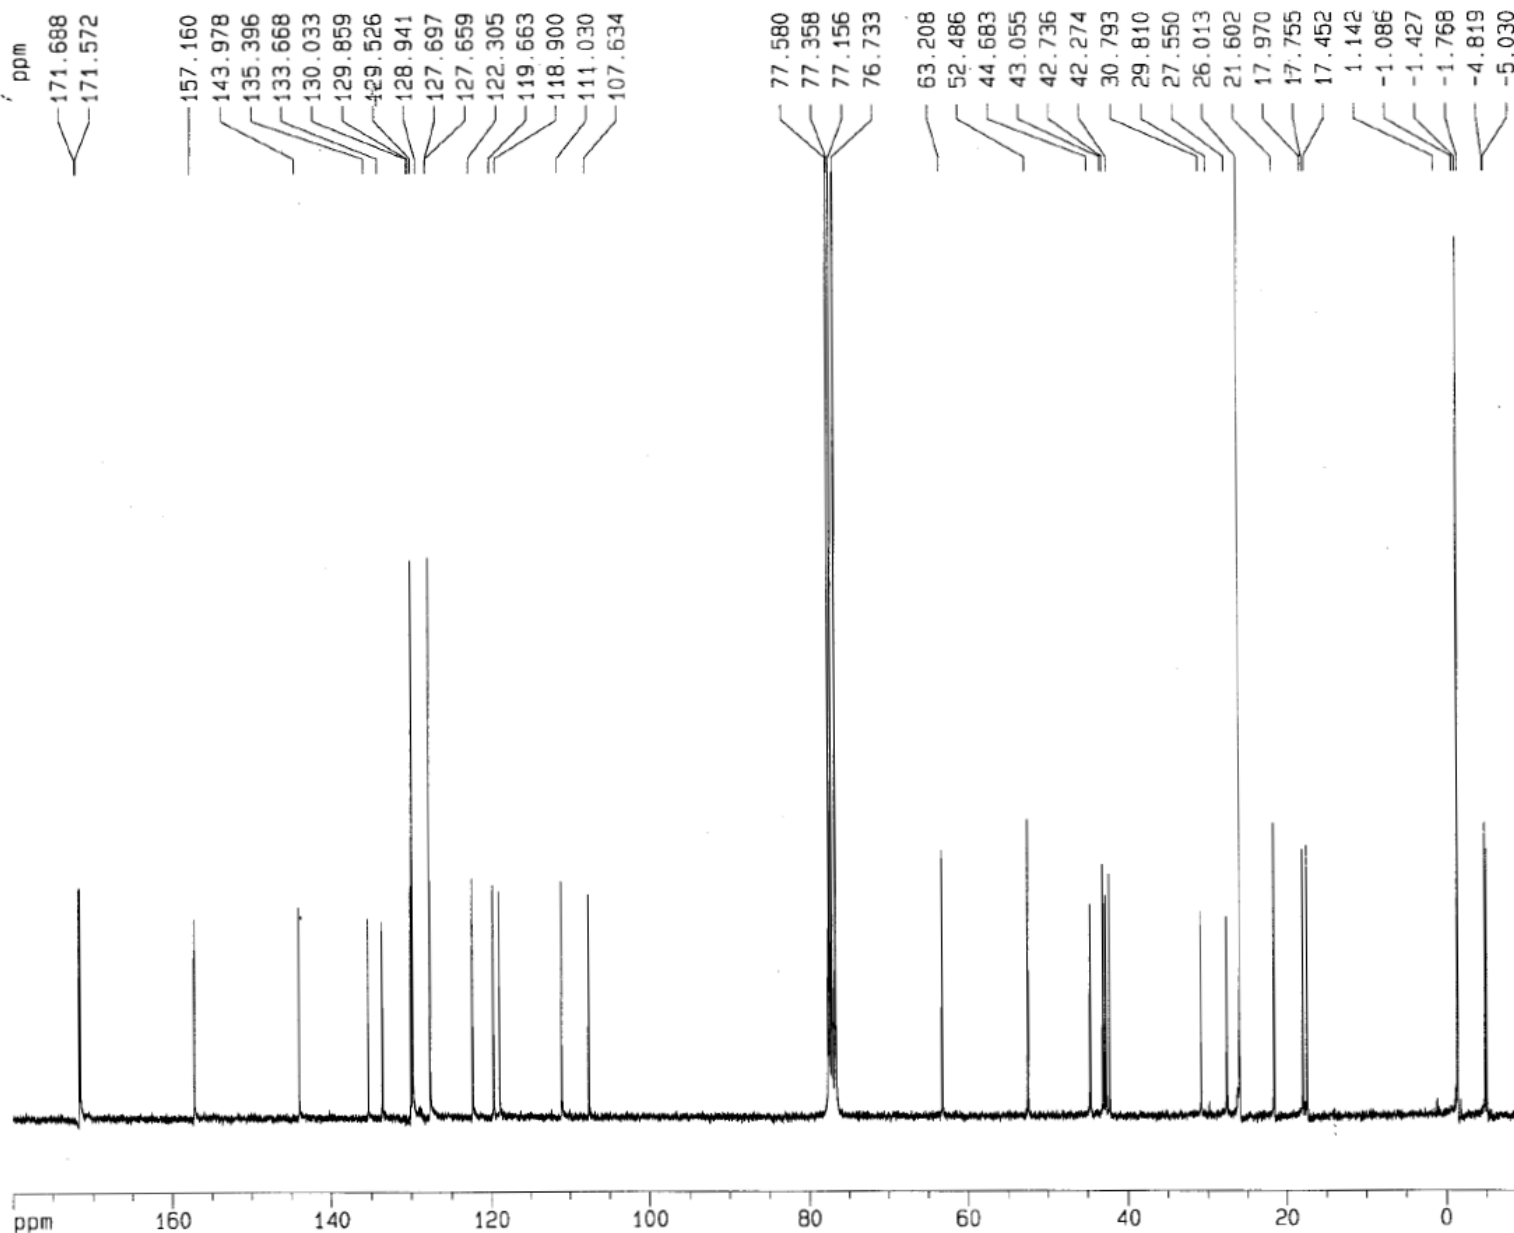

Current Data Parameters  
NAME 092212FYQcpd13  
EXPNO 2  
PROCNO 1

F2 - Acquisition Parameters  
Date\_ 20120922  
Time 22.08  
INSTRUM spect  
PROBHD 5 mm QNP 1H/1  
PULPROG zgpg30  
TD 65536  
SOLVENT CDC13  
NS 7168  
DS 4  
SWH 18796.992 Hz  
FIDRES 0.286819 Hz  
AQ 1.7433076 sec  
RG 1024  
DW 26.600 usec  
DE 6.00 usec  
TE 300.0 K  
D1 2.00000000 sec  
D11 0.03000000 sec  
D12 0.00002000 sec

===== CHANNEL f1 =====  
NUC1 13C  
P1 5.25 usec  
PL1 -6.00 dB  
SF01 75.4106357 MHz

===== CHANNEL f2 =====  
CPDPRG2 waltz16  
NUC2 1H  
PCPD2 115.00 usec  
PL2 0.00 dB  
PL12 19.70 dB  
PL13 19.70 dB  
SF02 299.8711995 MHz

F2 - Processing parameters  
SI 32768  
SF 75.4023654 MHz  
WDW EM  
SSB 0  
LB 1.00 Hz  
GB 0  
PC 1.40

1D NMR plot parameters  
CX 20.00 cm  
F1P 180.000 ppm  
F1 13572.43 Hz  
F2P -10.000 ppm  
F2 -754.02 Hz  
PPMCM 9.50000 ppm/cm  
HZCM 716.32251 Hz/cm

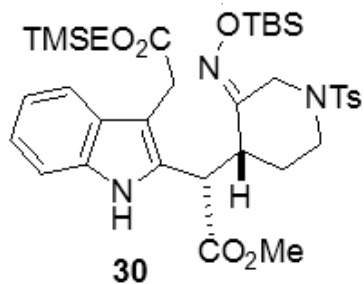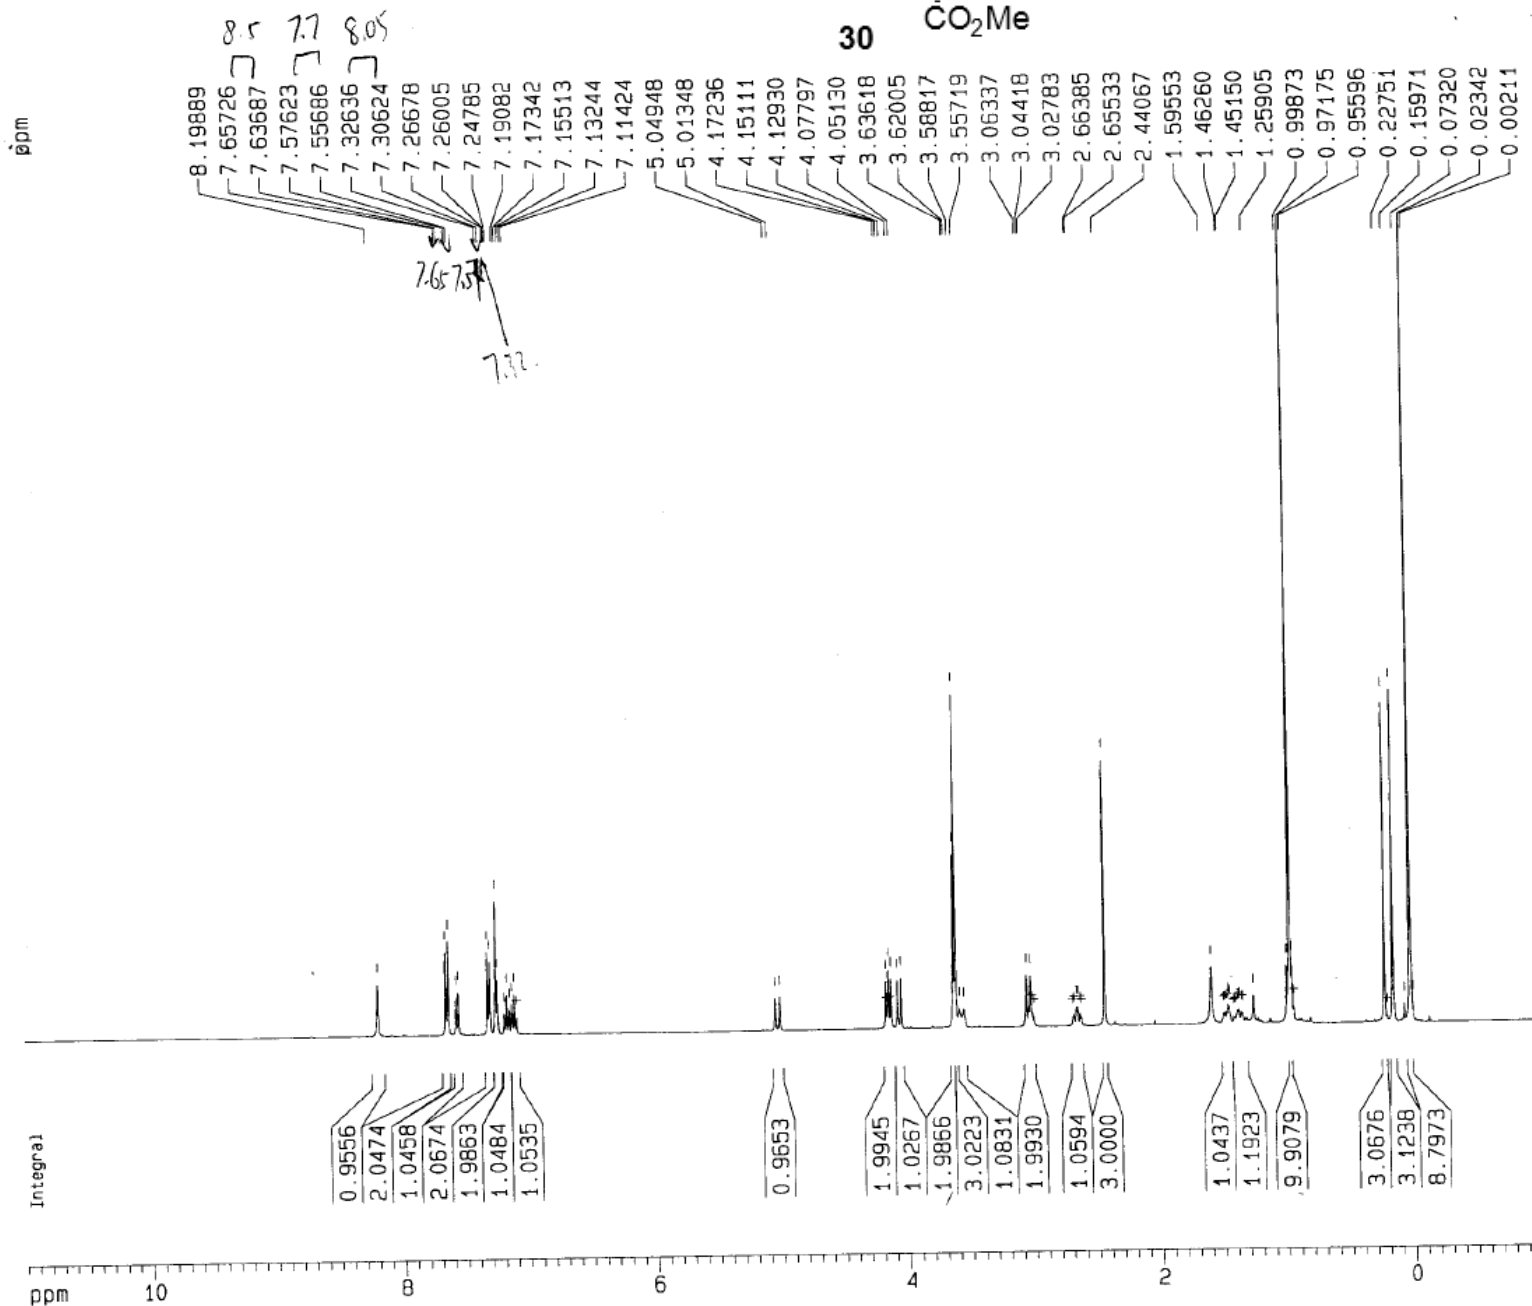

Current Data Parameters  
 NAME 071911FJ11-019  
 EXPNO 1  
 PROCNO 1

## F2 - Acquisition Parameters

Date\_ 20110719  
 Time 9.33  
 INSTRUM spect  
 PROBHD 5 mm BBI 1H-  
 PULPROG zg30  
 TD 65536  
 SOLVENT CDCl3  
 NS 16  
 DS 2  
 SWH 8278.146 Hz  
 FIDRES 0.126314 Hz  
 AQ 3.9584243 sec  
 RG 90.5  
 DW 60.400 usec  
 DE 6.00 usec  
 TE 300.0 K  
 D1 1.00000000 sec

----- CHANNEL f1 -----  
 NUC1 1H  
 P1 6.45 usec  
 PL1 0.00 dB  
 SFO1 400.1324710 MHz

## F2 - Processing parameters

SI 32768  
 SF 400.1300086 MHz  
 WDW EM  
 SSB 0  
 LB 0.30 Hz  
 GB 0  
 PC 1.00

## 1D NMR plot parameters

CX 20.00 cm  
 F1P 11.000 ppm  
 F1 4401.43 Hz  
 F2P -1.000 ppm  
 F2 -400.13 Hz  
 PPMCM 0.60000 ppm/cm  
 HZCM 240.07800 Hz/cm

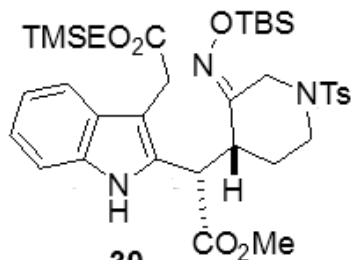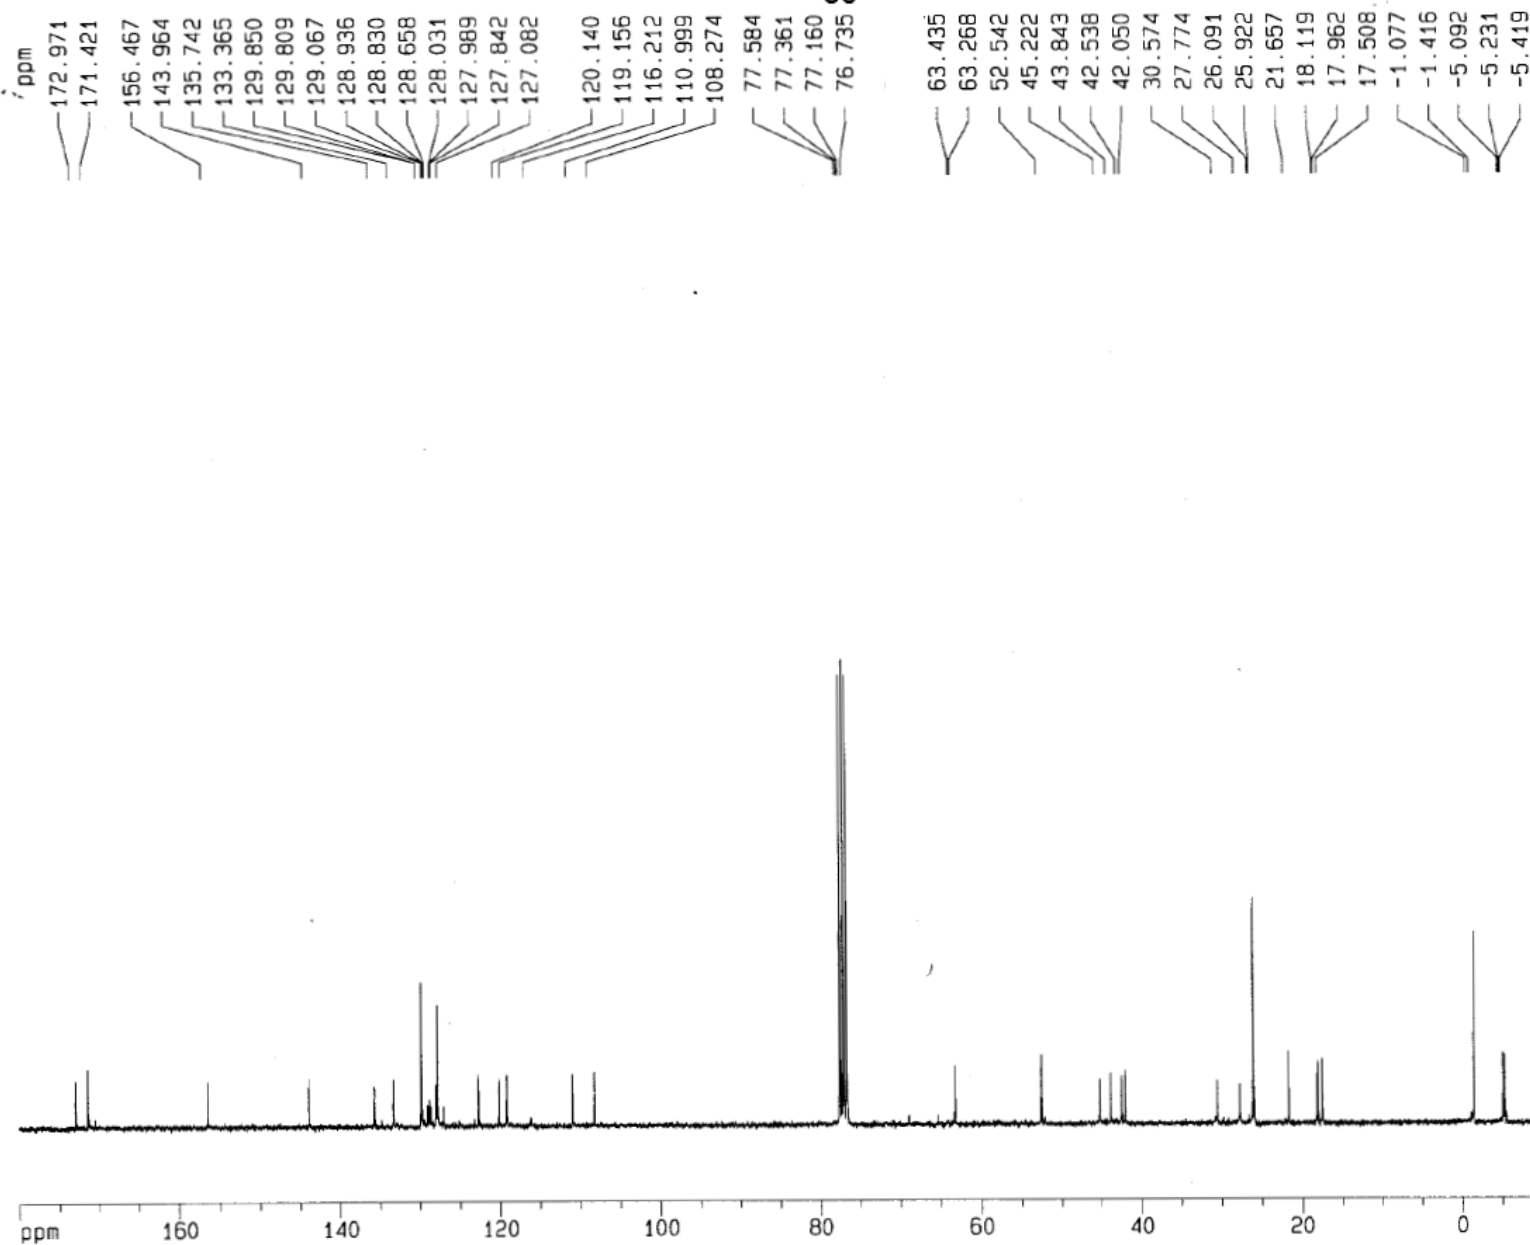

Current Data Parameters  
 NAME 092212FYGcpd14  
 EXPNO 2  
 PROCNO 1

## F2 - Acquisition Parameters

Date\_ 20120922  
 Time 23.19  
 INSTRUM spect  
 PROBHD 5 mm GNP 1H/1  
 PULPROG zgpg30  
 TD 65536  
 SOLVENT CDC13  
 NS 1024  
 DS 4  
 SWH 18796.992 Hz  
 FIDRES 0.286819 Hz  
 AQ 1.7433076 sec  
 RG 1024  
 DW 26.600 usec  
 DE 6.00 usec  
 TE 300.0 K  
 D1 2.0000000 sec  
 D11 0.0300000 sec  
 D12 0.0000200 sec

===== CHANNEL f1 =====  
 NUC1 13C  
 P1 5.25 usec  
 PL1 -6.00 dB  
 SF01 75.4106357 MHz

===== CHANNEL f2 =====  
 CPDPRG2 waltz16  
 NUC2 1H  
 PCPD2 115.00 usec  
 PL2 0.00 dB  
 PL12 19.70 dB  
 PL13 19.70 dB  
 SF02 299.8711995 MHz

## F2 - Processing parameters

SI 32768  
 SF 75.4023660 MHz  
 WDW EM  
 SSB 0  
 LB 1.00 Hz  
 GB 0  
 PC 1.40

## 1D NMR plot parameters

CX 20.00 cm  
 F1P 180.000 ppm  
 F1 13572.43 Hz  
 F2P -10.000 ppm  
 F2 -754.02 Hz  
 PPMCM 9.50000 ppm/cm  
 HZCM 716.32251 Hz/cm

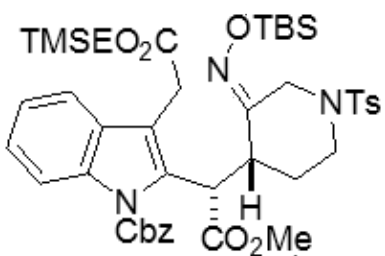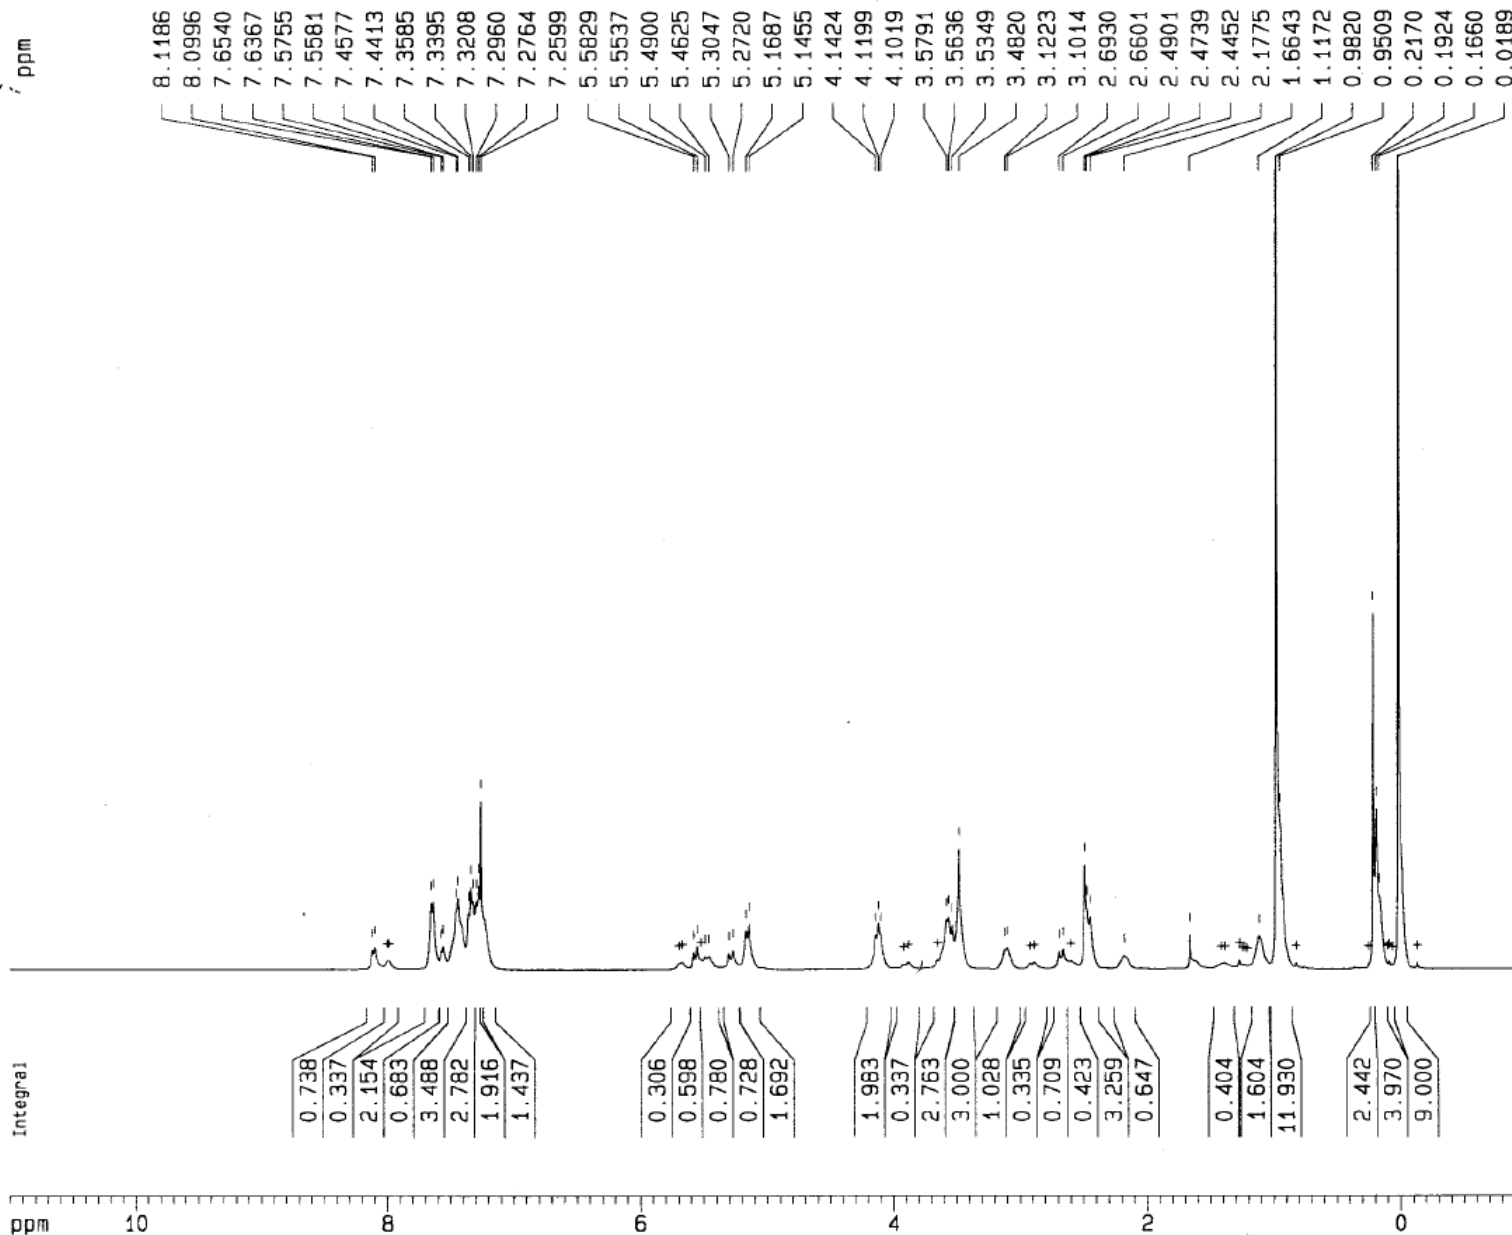

Current Data Parameters  
 NAME 092512FYQ-15  
 EXPNO 1  
 PROCNO 1

F2 - Acquisition Parameters  
 Date\_ 20120925  
 Time 18.02  
 INSTRUM spect  
 PROBHD 5 mm BBI 1H-  
 PULPROG zg30  
 TD 65536  
 SOLVENT CDC13  
 NS 16  
 DS 2  
 SWH 8278.146 Hz  
 FIDRES 0.126314 Hz  
 AQ 3.9584243 sec  
 RG 57  
 DW 60.400 usec  
 DE 6.00 usec  
 TE 300.0 K  
 D1 1.00000000 sec

----- CHANNEL f1 -----  
 NUC1 1H  
 P1 6.45 usec  
 PL1 0.00 dB  
 SF01 400.1324710 MHz

F2 - Processing parameters  
 SI 32768  
 SF 400.1300096 MHz  
 WDW EM  
 SSB 0  
 LB 0.30 Hz  
 GB 0  
 PC 1.00

1D NMR plot parameters  
 CX 20.00 cm  
 F1P 11.000 ppm  
 F1 4401.43 Hz  
 F2P -1.000 ppm  
 F2 -400.13 Hz  
 PPMCM 0.60000 ppm/cm  
 HZCM 240.07800 Hz/cm

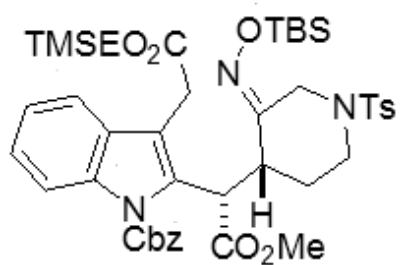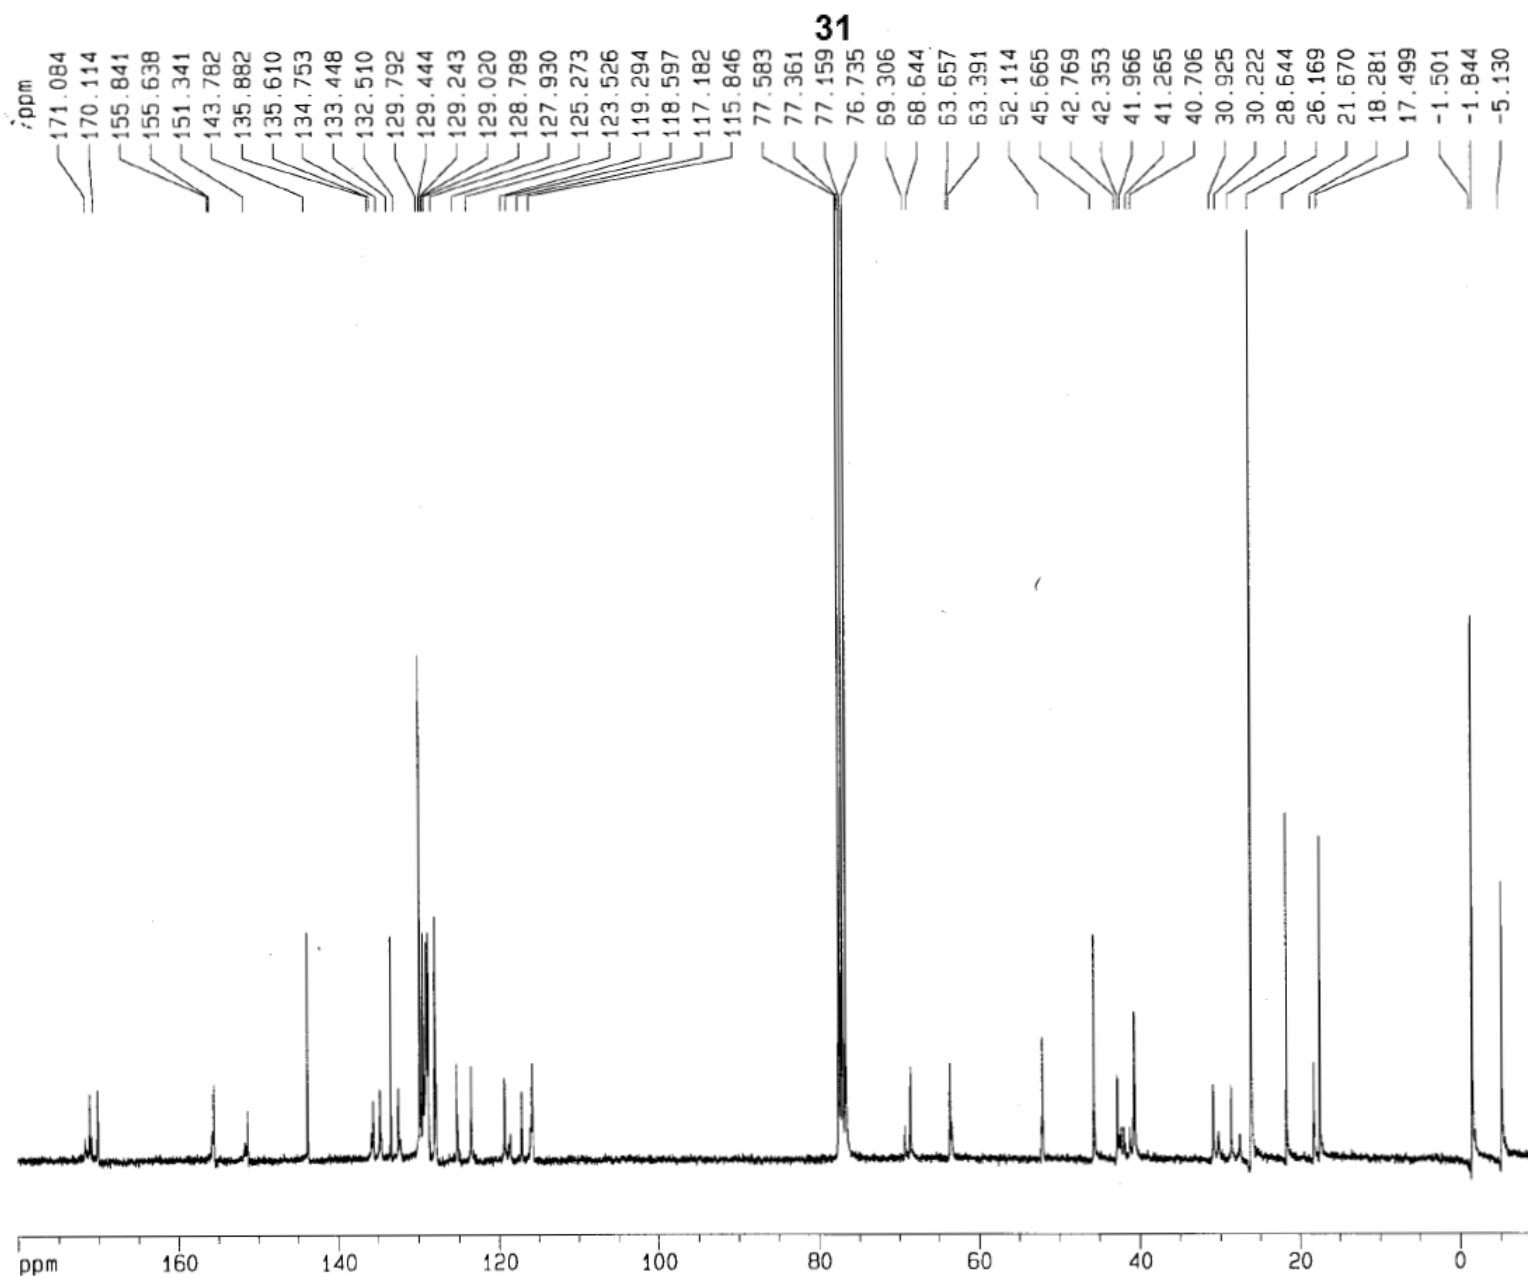

Current Data Parameters  
NAME 092412FY0-15  
EXPNO 1  
PROCNO 1

F2 - Acquisition Parameters  
Date\_ 20120925  
Time 6.27  
INSTRUM spect  
PROBHD 5 mm GNP 1H/1  
PULPROG zgpg30  
TD 65536  
SOLVENT CDC13  
NS 6656  
DS 4  
SWH 18796.992 Hz  
FIDRES 0.286819 Hz  
AQ 1.7433076 sec  
RG 1024  
DW 26.600 usec  
DE 6.00 usec  
TE 300.0 K  
D1 2.0000000 sec  
D11 0.0300000 sec  
D12 0.0000200 sec

===== CHANNEL f1 =====  
NUC1 13C  
P1 5.25 usec  
PL1 -6.00 dB  
SF01 75.4106357 MHz

===== CHANNEL f2 =====  
CPDPRG2 waltz16  
NUC2 1H  
PCPD2 115.00 usec  
PL2 0.00 dB  
PL12 19.70 dB  
PL13 19.70 dB  
SF02 299.8711995 MHz

F2 - Processing parameters  
SI 32768  
SF 75.4023671 MHz  
WDW EM  
SSB 0  
LB 1.00 Hz  
GB 0  
PC 1.40

1D NMR plot parameters  
CX 20.00 cm  
F1P 180.000 ppm  
F1 13572.43 Hz  
F2P -10.000 ppm  
F2 -754.02 Hz  
PPMCM 9.50000 ppm/cm  
HZCM 716.32251 Hz/cm

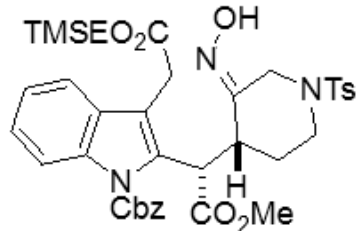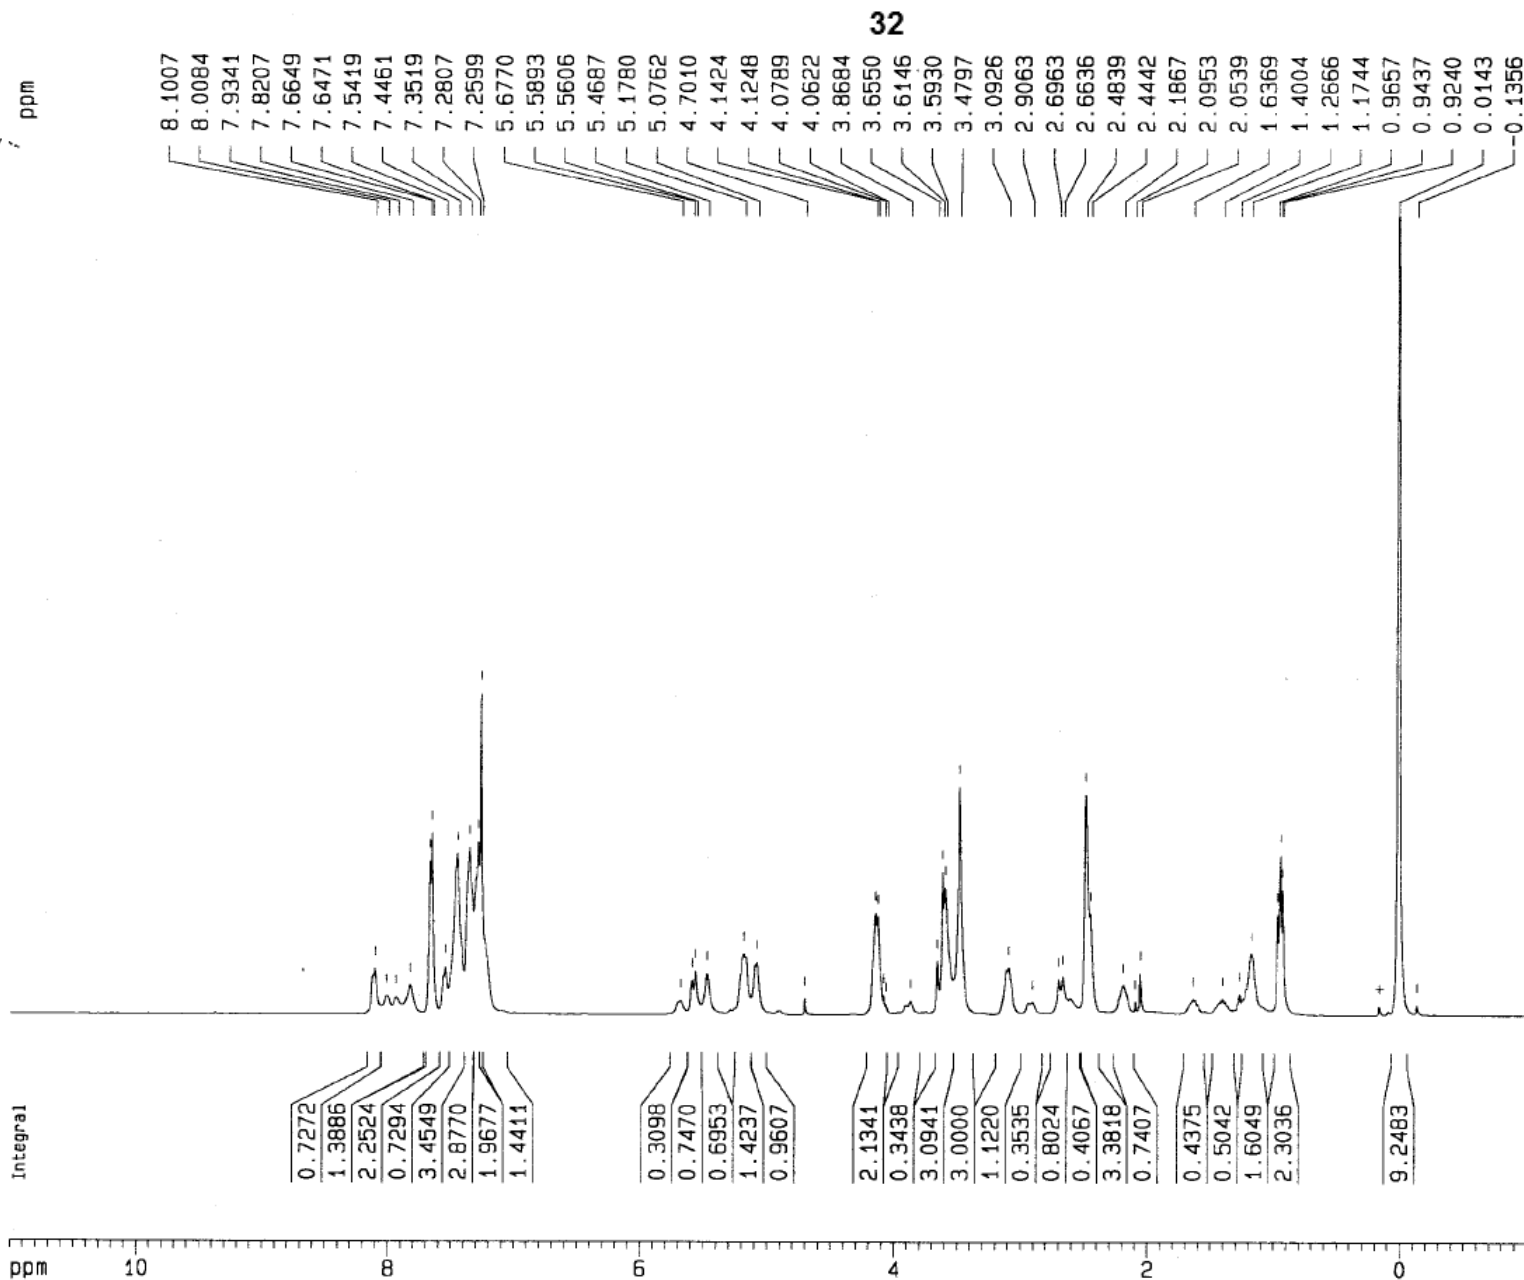

Current Data Parameters  
 NAME 092512FYQ-16  
 EXPNO 1  
 PROCNO 1

F2 - Acquisition Parameters  
 Date\_ 20120925  
 Time 18.29  
 INSTRUM spect  
 PROBHD 5 mm BBI 1H-  
 PULPROG zg30  
 TD 65536  
 SOLVENT CDCl3  
 NS 16  
 DS 2  
 SWH 8278.146 Hz  
 FIDRES 0.126314 Hz  
 AQ 3.9584243 sec  
 RG 50.8  
 DW 60.400 usec  
 DE 6.00 usec  
 TE 300.0 K  
 D1 1.00000000 sec

===== CHANNEL f1 =====  
 NUC1 1H  
 P1 6.45 usec  
 PL1 0.00 dB  
 SF01 400.1324710 MHz

F2 - Processing parameters  
 SI 32768  
 SF 400.1300096 MHz  
 WDW EM  
 SSB 0  
 LB 0.30 Hz  
 GB 0  
 PC 1.00

1D NMR plot parameters  
 CX 20.00 cm  
 F1P 11.000 ppm  
 F1 4401.43 Hz  
 F2P -1.000 ppm  
 F2 -400.13 Hz  
 PPMCM 0.60000 ppm/cm  
 HZCM 240.07800 Hz/cm

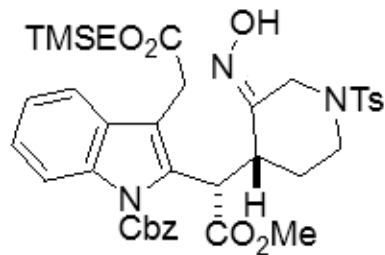

32

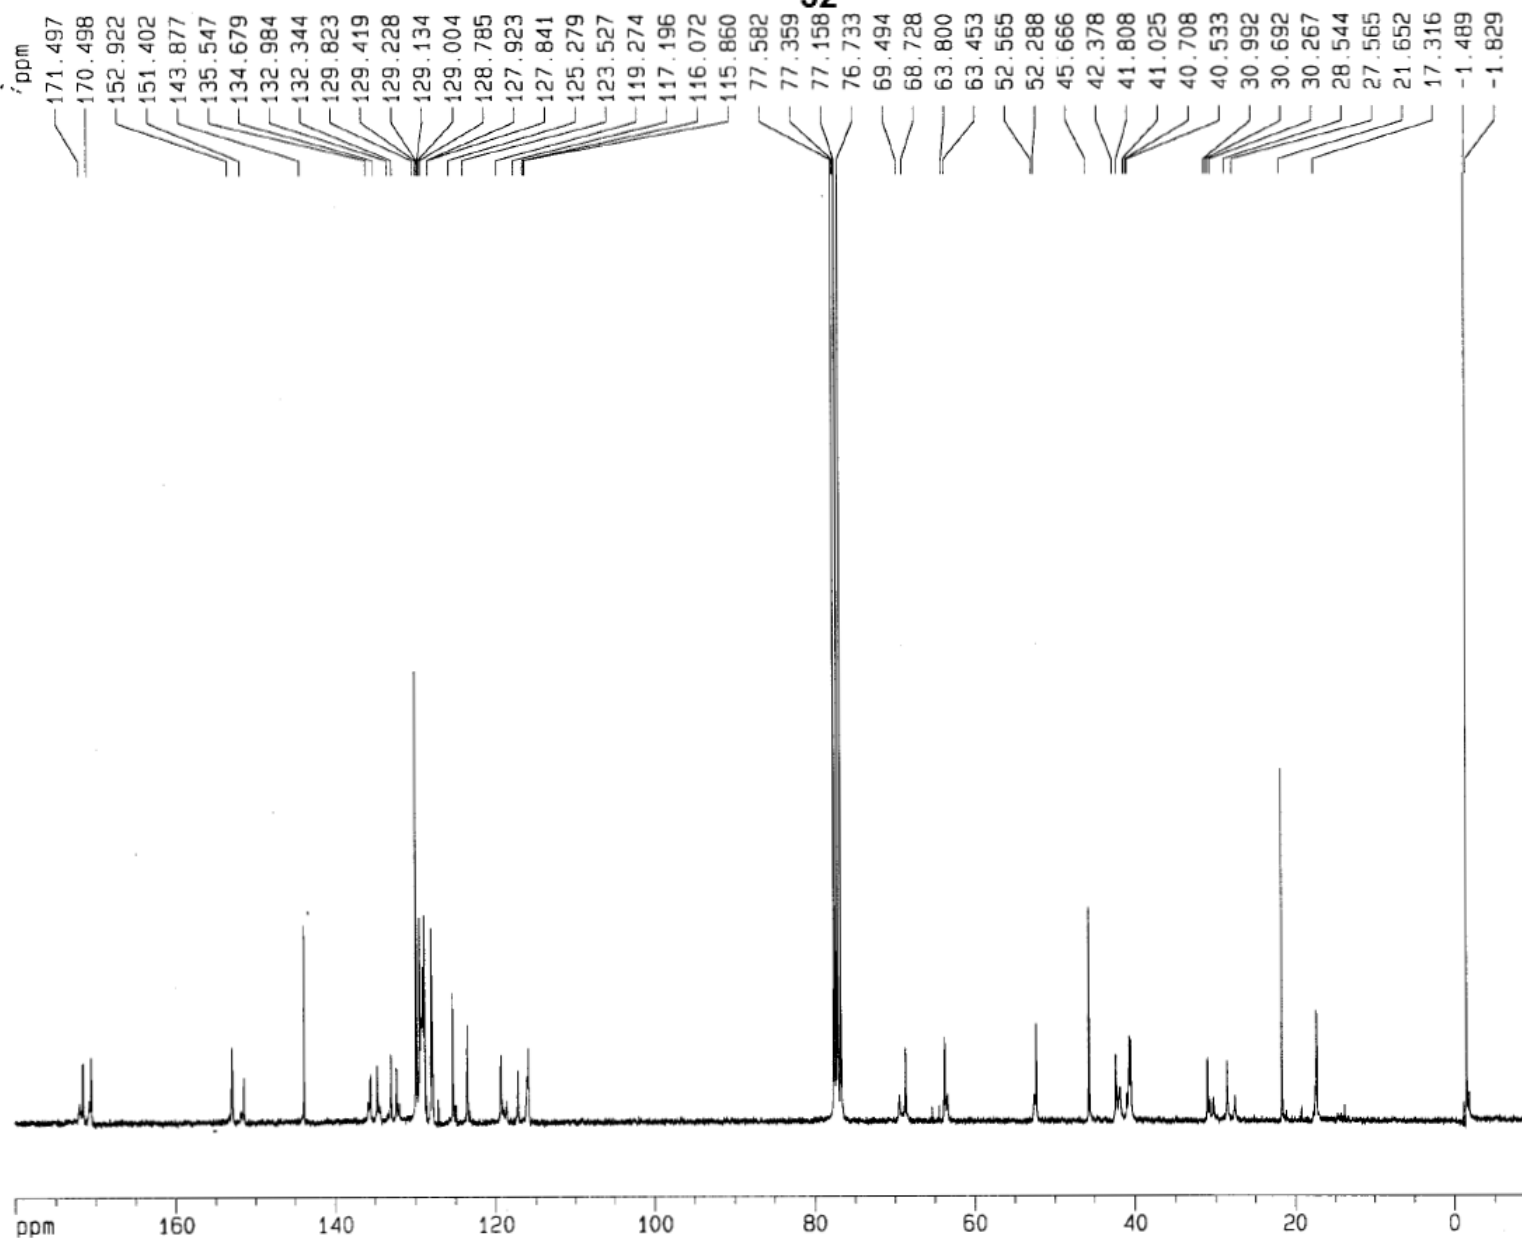

## Current Data Parameters

NAME 092512FYQ-16  
 EXPNO 1  
 PROCNO 1

## F2 - Acquisition Parameters

Date\_ 20120926  
 Time 7.49  
 INSTRUM spect  
 PROBHD 5 mm QNP 1H/1  
 PULPROG zgpg30  
 TO 65536  
 SOLVENT CDCl3  
 NS 8192  
 DS 4  
 SWH 18796.992 Hz  
 FIDRES 0.286819 Hz  
 AQ 1.7433076 sec  
 RG 4096  
 DW 26.600 usec  
 DE 6.00 usec  
 TE 300.0 K  
 D1 2.00000000 sec  
 D11 0.03000000 sec  
 D12 0.00002000 sec

----- CHANNEL f1 -----  
 NUC1 13C  
 P1 5.25 usec  
 PL1 -6.00 dB  
 SFO1 75.4106357 MHz

----- CHANNEL f2 -----  
 CPDPRG2 waltz16  
 NUC2 1H  
 PCPD2 115.00 usec  
 PL2 0.00 dB  
 PL12 19.70 dB  
 PL13 19.70 dB  
 SFO2 299.8711995 MHz

## F2 - Processing parameters

SI 32768  
 SF 75.4023694 MHz  
 WDW EM  
 SSB 0  
 LB 1.00 Hz  
 GB 0  
 PC 1.40

## 1D NMR plot parameters

CX 20.00 cm  
 F1P 180.000 ppm  
 F1 13572.43 Hz  
 F2P -10.000 ppm  
 F2 -754.02 Hz  
 PPMCM 9.50000 ppm/cm  
 HZCM 716.32251 Hz/cm

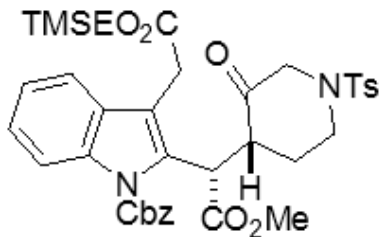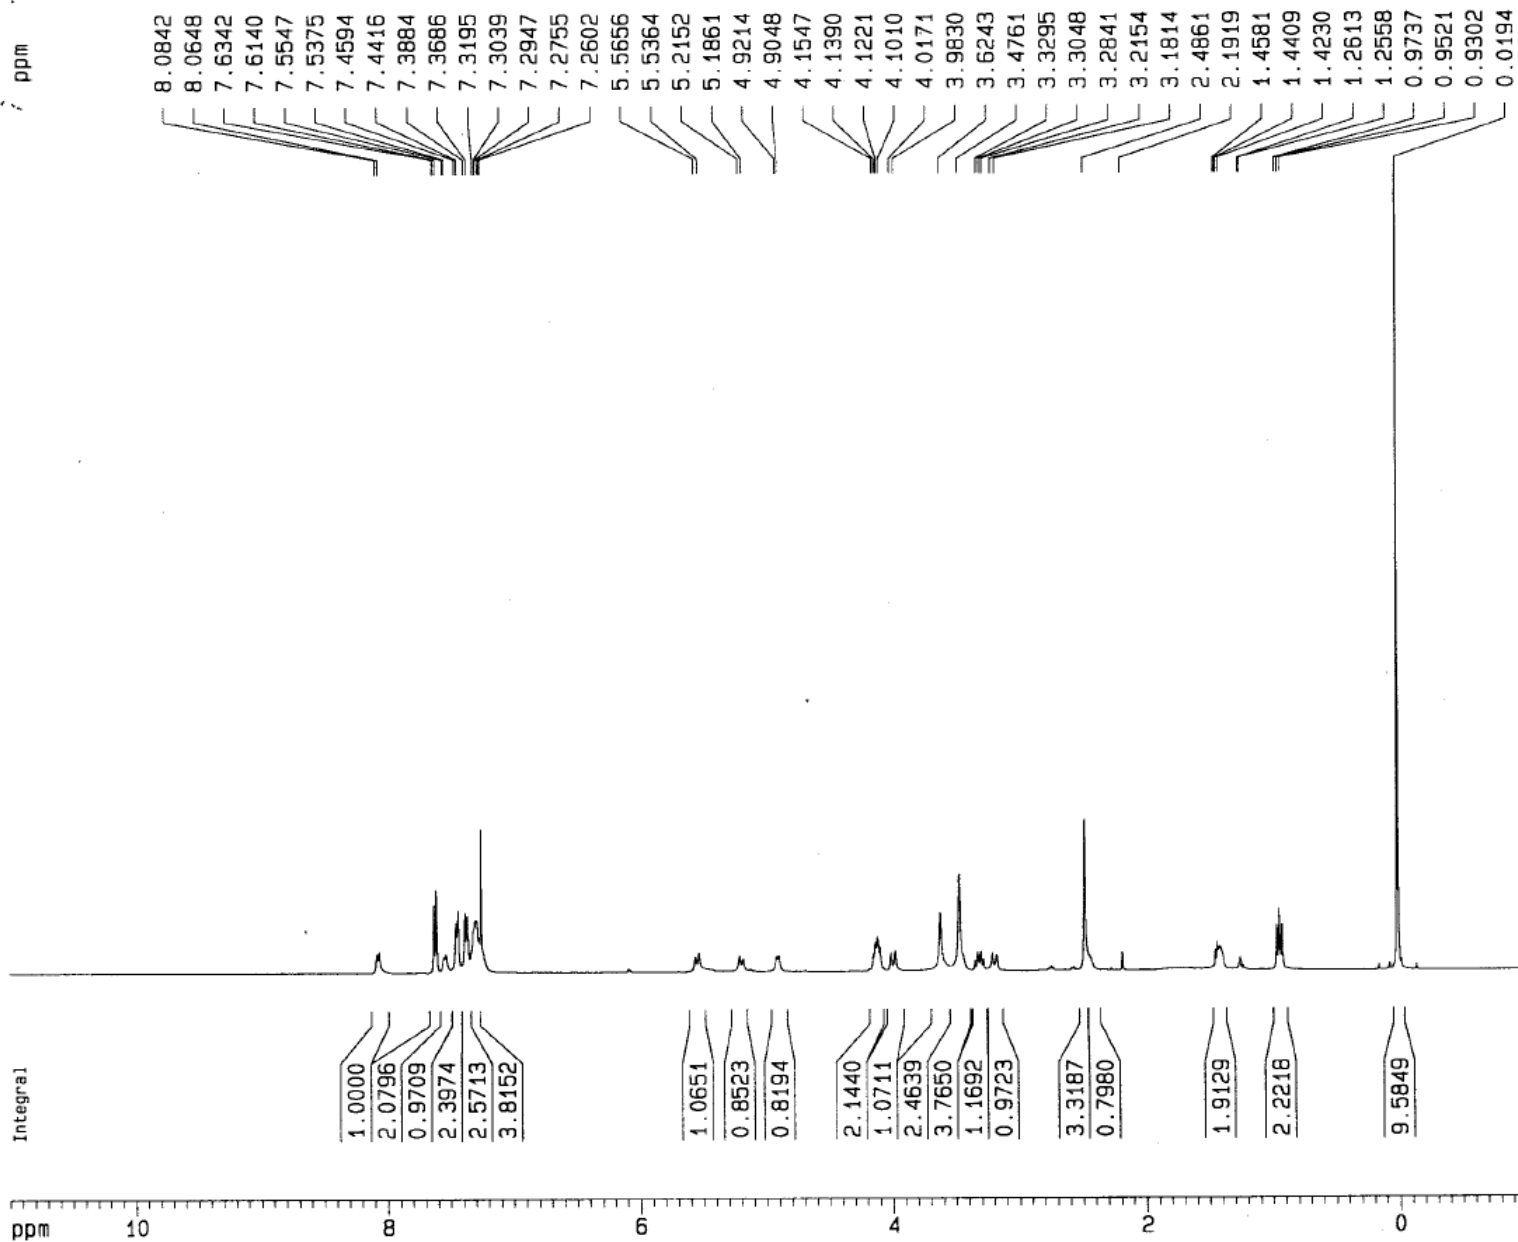

Current Data Parameters  
NAME 092612FYQ-17  
EXPNO 1  
PROCNO 1

## F2 - Acquisition Parameters

Date\_ 20120926  
Time 9.06  
INSTRUM spect  
PROBHD 5 mm BBI 1H-  
PULPROG zg30  
TD 65536  
SOLVENT CDC13  
NS 16  
DS 2  
SWH 8278.146 Hz  
FIDRES 0.126314 Hz  
AQ 3.9584243 sec  
RG 114  
DW 60.400 usec  
DE 6.00 usec  
TE 300.0 K  
D1 1.0000000 sec

===== CHANNEL f1 =====  
NUC1 1H  
P1 6.45 usec  
PL1 0.00 dB  
SF01 400.1324710 MHz

## F2 - Processing parameters

SI 32768  
SF 400.1300091 MHz  
WDW EM  
SSB 0  
LB 0.30 Hz  
GB 0  
PC 1.00

## 1D NMR plot parameters

CX 20.00 cm  
F1P 11.000 ppm  
F1 4401.43 Hz  
F2P -1.000 ppm  
F2 -400.13 Hz  
PPMCM 0.60000 ppm/cm  
HZCM 240.07800 Hz/cm



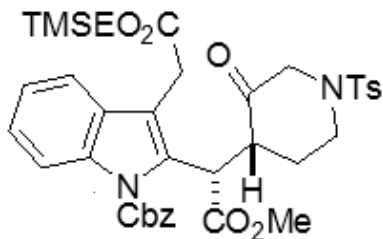

33

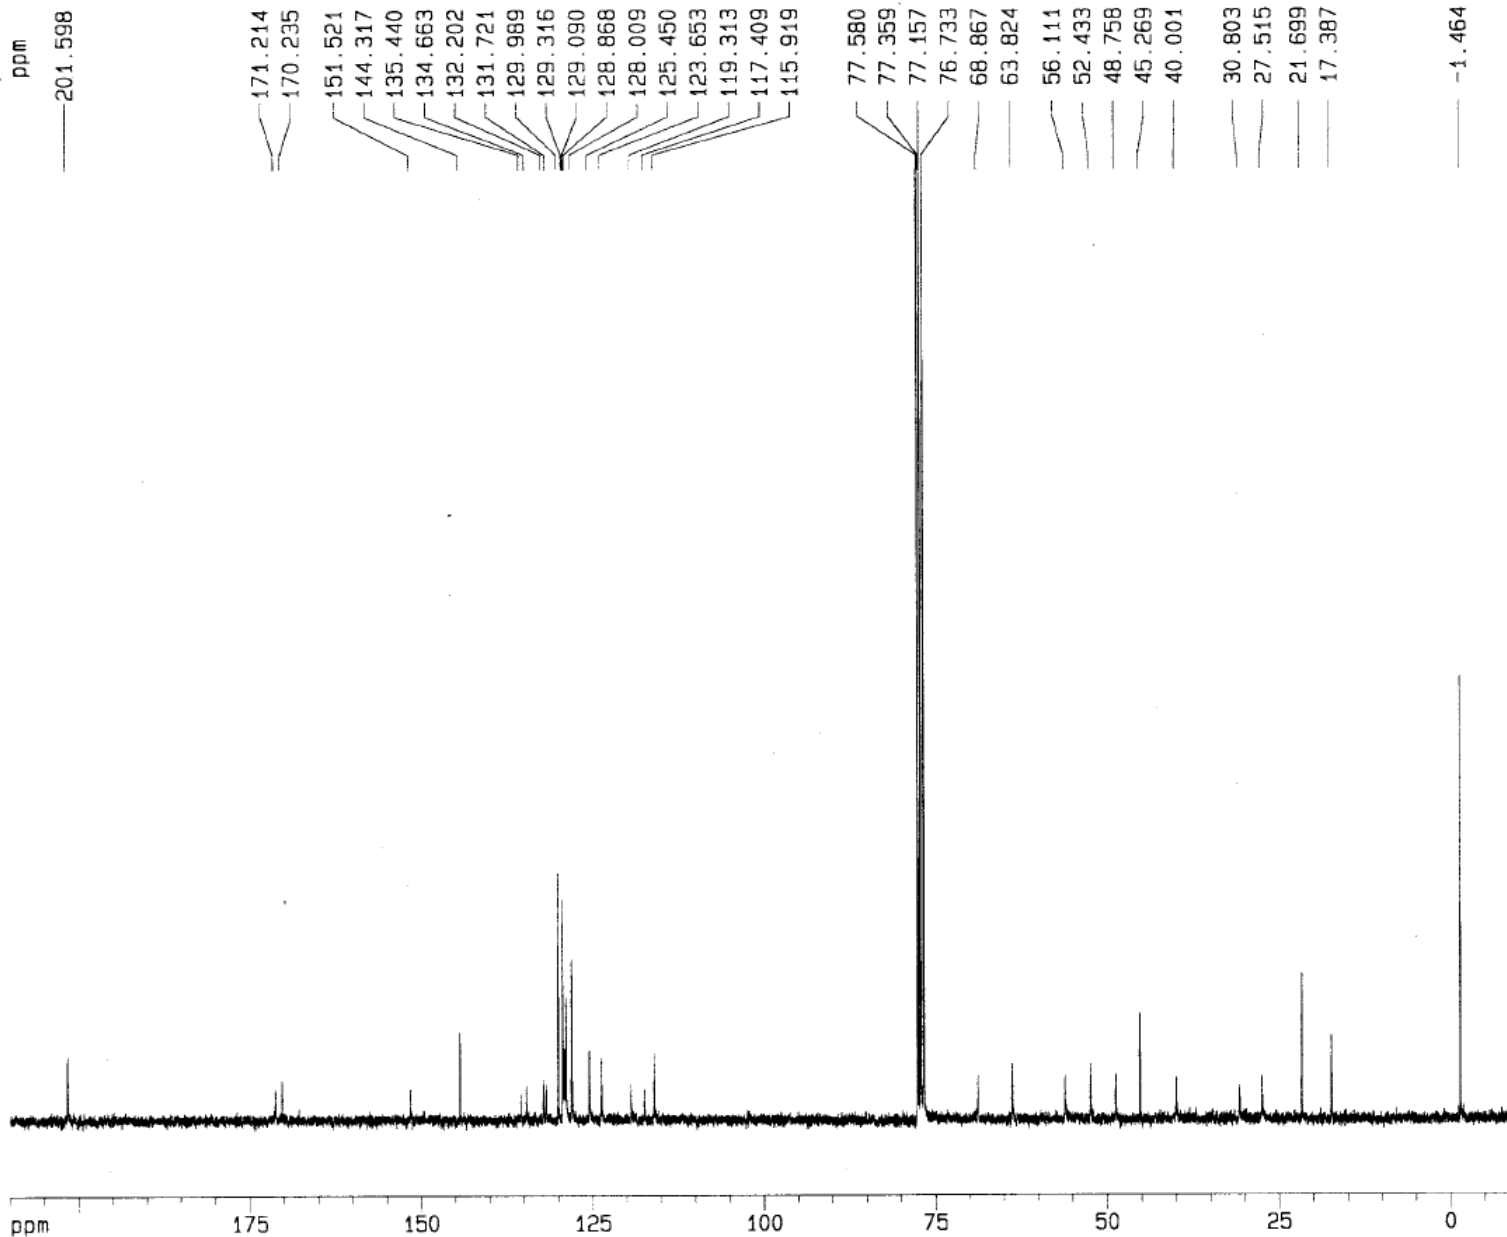

Current Data Parameters  
 NAME 092512FYG-17  
 EXPNO 2  
 PROCNO 1

F2 - Acquisition Parameters  
 Date\_ 20120925  
 Time 21.56  
 INSTRUM spect  
 PROBHD 5 mm Multinu  
 PULPROG zgpg30  
 TD 65536  
 SOLVENT CDCl3  
 NS 1024  
 DS 4  
 SWH 18832.393 Hz  
 FIDRES 0.287360 Hz  
 AQ 1.7400308 sec  
 RG 13004  
 DW 26.550 usec  
 DE 6.00 usec  
 TE 300.0 K  
 D1 2.0000000 sec  
 d11 0.0300000 sec  
 d12 0.0002000 sec

===== CHANNEL f1 =====  
 NUC1 13C  
 P1 9.75 usec  
 PL1 0.00 dB  
 SF01 75.4760200 MHz

===== CHANNEL f2 =====  
 CPDPRG2 waltz16  
 NUC2 1H  
 PCPD2 110.00 usec  
 PL2 0.00 dB  
 PL12 17.50 dB  
 PL13 17.50 dB  
 SF02 300.1312005 MHz

F2 - Processing parameters  
 SI 32768  
 SF 75.4677428 MHz  
 WDW EM  
 SSB 0  
 LB 1.00 Hz  
 GB 0  
 PC 1.40

1D NMR plot parameters  
 CX 20.00 cm  
 F1P 210.000 ppm  
 F1 15848.23 Hz  
 F2P -10.000 ppm  
 F2 -754.68 Hz  
 PPMCM 11.00000 ppm/cm  
 HZCM 830.14514 Hz/cm

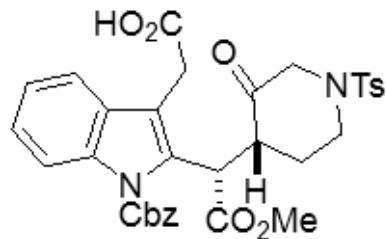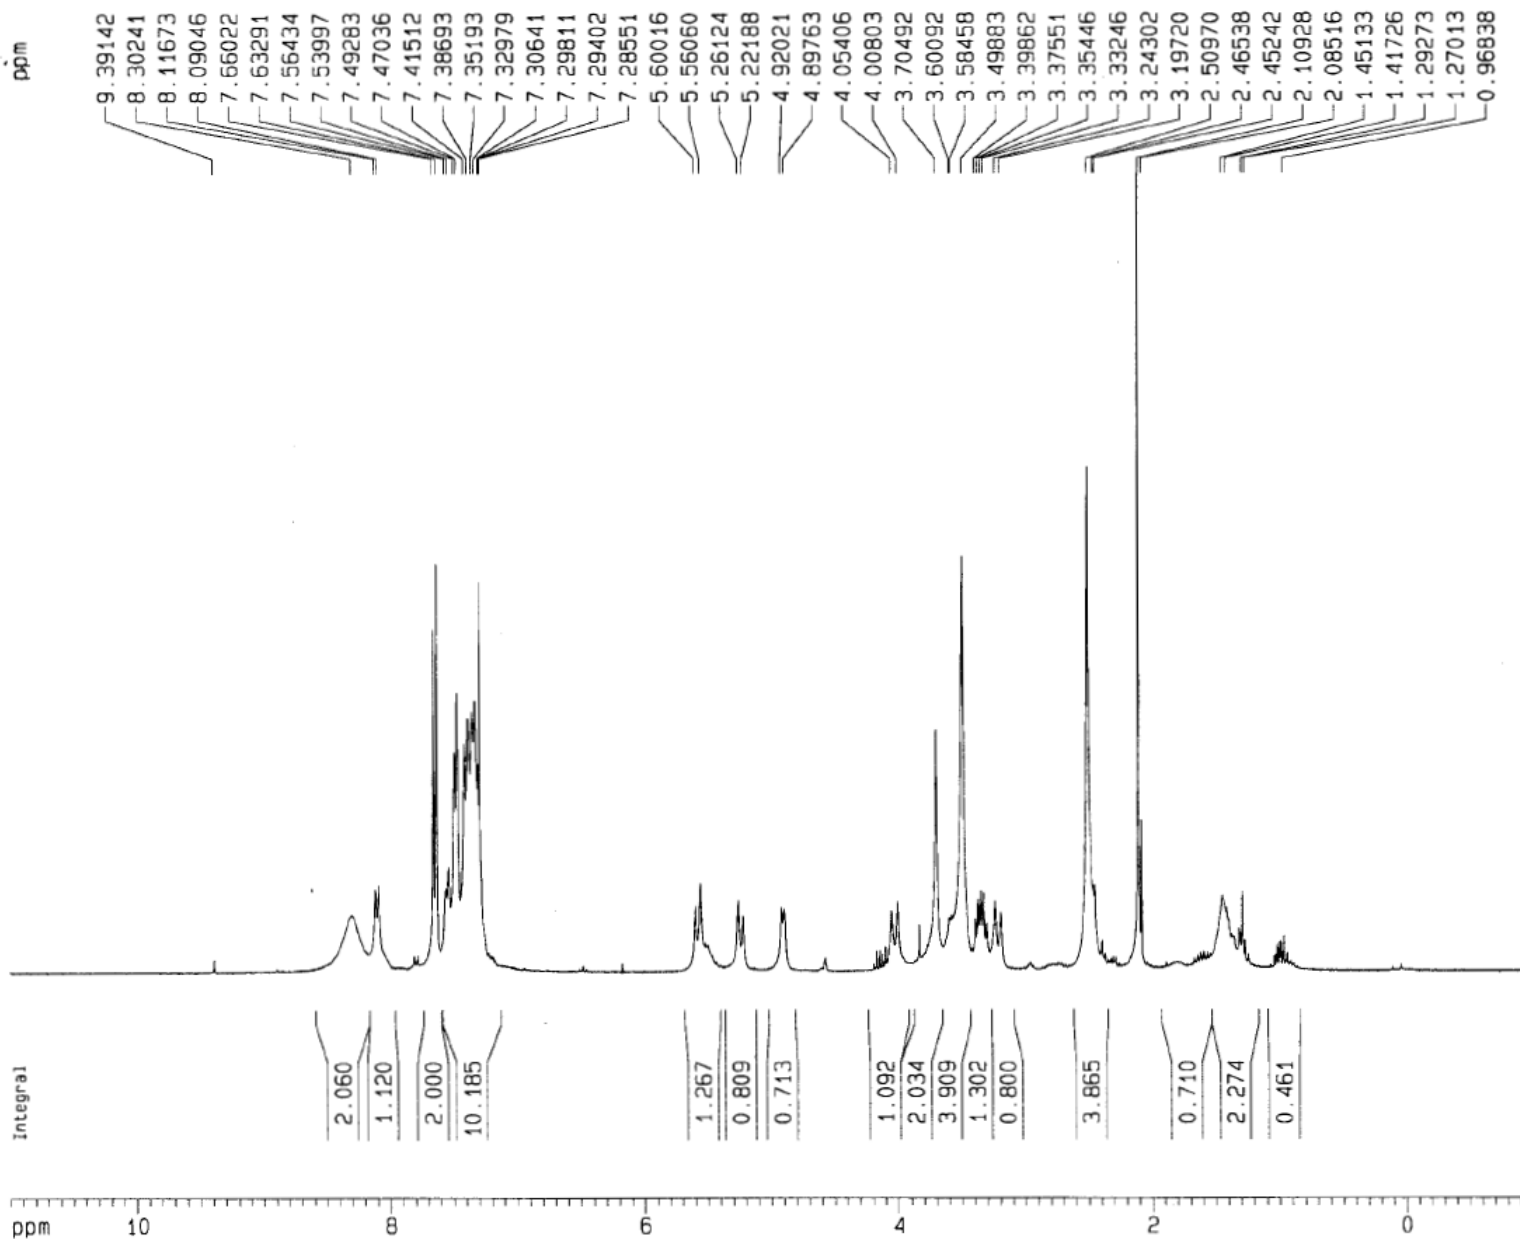

Current Data Parameters  
 NAME 032310mm5085  
 EXPNO 1  
 PROCNO 1

F2 - Acquisition Parameters  
 Date\_ 20100323  
 Time 6.57  
 INSTRUM spect  
 PROBHD 5 mm QNP 1H/1  
 PULPROG zg30  
 TD 24690  
 SOLVENT CDC13  
 NS 16  
 DS 2  
 SWH 6172.839 Hz  
 FIDRES 0.250014 Hz  
 AQ 1.9999400 sec  
 RG 228.1  
 DW 81.000 usec  
 DE 6.00 usec  
 TE 300.0 K  
 D1 1.00000000 sec

===== CHANNEL f1 =====  
 NUC1 1H  
 P1 11.70 usec  
 PL1 0.00 dB  
 SFO1 299.8718518 MHz

F2 - Processing parameters  
 SI 32768  
 SF 299.8700000 MHz  
 WDW no  
 SSB 0  
 LB 0.00 Hz  
 GB 0  
 PC 1.00

1D NMR plot parameters  
 CX 20.00 cm  
 F1P 11.000 ppm  
 F1 3298.57 Hz  
 F2P -1.000 ppm  
 F2 -299.87 Hz  
 PPMCM 0.60000 ppm/cm  
 HZCM 179.92200 Hz/cm

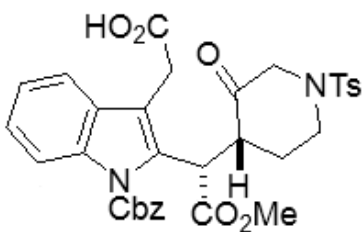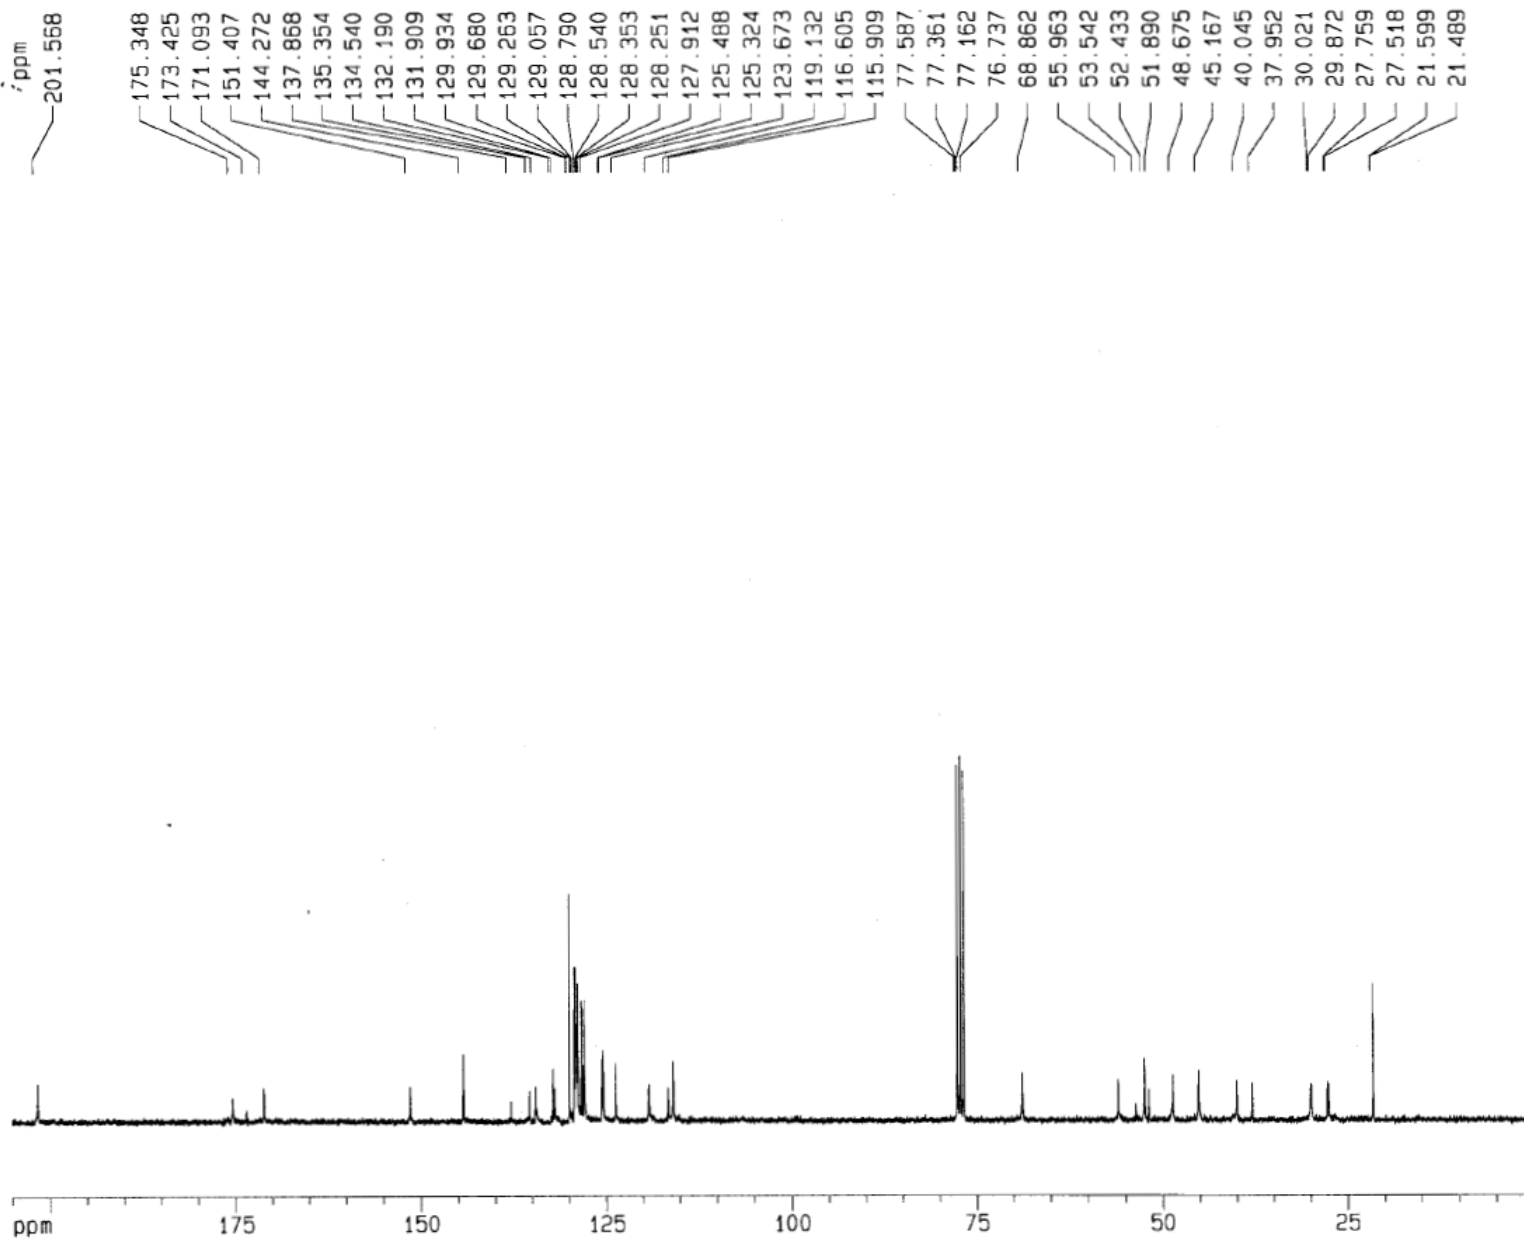

## Current Data Parameters

NAME 092512FYQ-18  
EXPNO 1  
PROCNO 1

## F2 - Acquisition Parameters

Date\_ 20120925  
Time 23.10  
INSTRUM spect  
PROBHD 5 mm GNP 1H/1  
PULPROG zgpg30  
TD 65536  
SOLVENT CDC13  
NS 769  
DS 4  
SWH 18796.992 Hz  
FIDRES 0.286819 Hz  
AQ 1.7433076 sec  
RG 4096  
DW 26.600 usec  
DE 6.00 usec  
TE 300.0 K  
D1 2.00000000 sec  
D11 0.03000000 sec  
D12 0.00002000 sec

----- CHANNEL f1 -----  
NUC1 13C  
P1 5.25 usec  
PL1 -6.00 dB  
SFO1 75.4106357 MHz

----- CHANNEL f2 -----  
CPDPRG2 waltz16  
NUC2 1H  
PCPD2 115.00 usec  
PL2 0.00 dB  
PL12 19.70 dB  
PL13 19.70 dB  
SFO2 299.8711995 MHz

## F2 - Processing parameters

SI 32768  
SF 75.4023746 MHz  
WDW EM  
SSB 0  
LB 1.00 Hz  
GB 0  
PC 1.40

## 1D NMR plot parameters

CX 20.00 cm  
F1P 205.000 ppm  
F1 15457.49 Hz  
F2P 0.000 ppm  
F2 0.00 Hz  
PPMCM 10.25000 ppm/cm  
HZCM 772.87439 Hz/cm

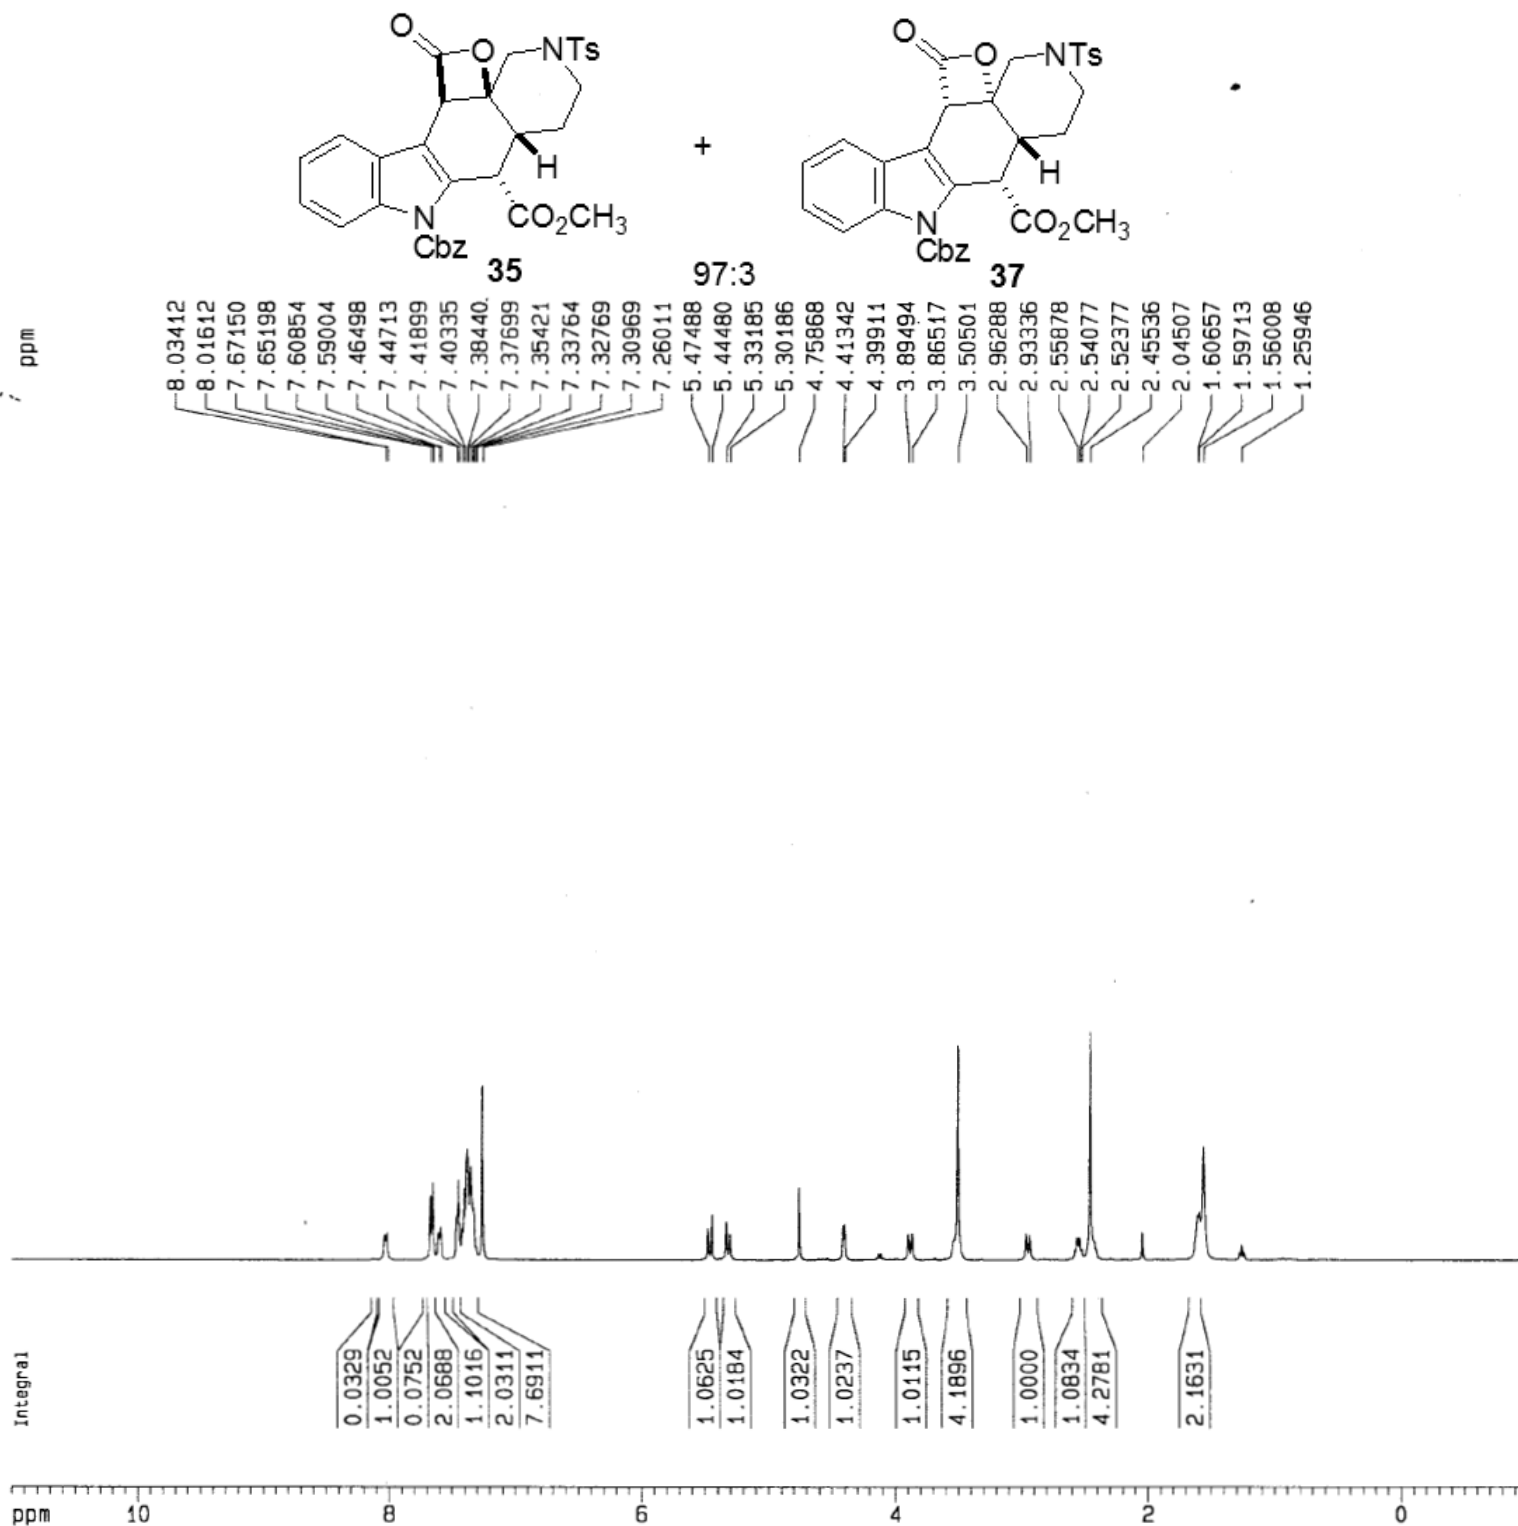

Current Data Parameters  
 NAME 090112FJIV101  
 EXPNO 1  
 PROCNO 1

F2 - Acquisition Parameters  
 Date\_ 20120901  
 Time 8.24  
 INSTRUM spect  
 PROBHD 5 mm BBI 1H-  
 PULPROG zg30  
 TD 65536  
 SOLVENT CDC13  
 NS 16  
 DS 2  
 SWH 8278.146 Hz  
 FIDRES 0.126314 Hz  
 AQ 3.9584243 sec  
 RG 645.1  
 DW 60.400 usec  
 DE 6.00 usec  
 TE 300.0 K  
 D1 1.00000000 sec

===== CHANNEL f1 =====  
 NUC1 1H  
 P1 6.45 usec  
 PL1 0.00 dB  
 SF01 400.1324710 MHz

F2 - Processing parameters  
 SI 32768  
 SF 400.1300094 MHz  
 WDN EM  
 SSB 0  
 LB 0.30 Hz  
 GB 0  
 PC 1.00

1D NMR plot parameters  
 CX 20.00 cm  
 F1P 11.000 ppm  
 F1 4401.43 Hz  
 F2P -1.000 ppm  
 F2 -400.13 Hz  
 PPMCM 0.60000 ppm/cm  
 HZCM 240.07800 Hz/cm

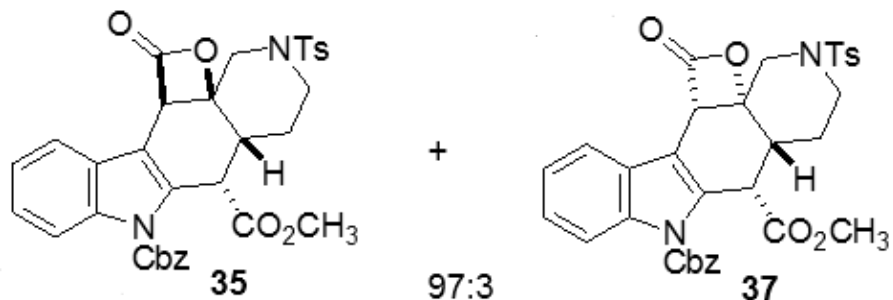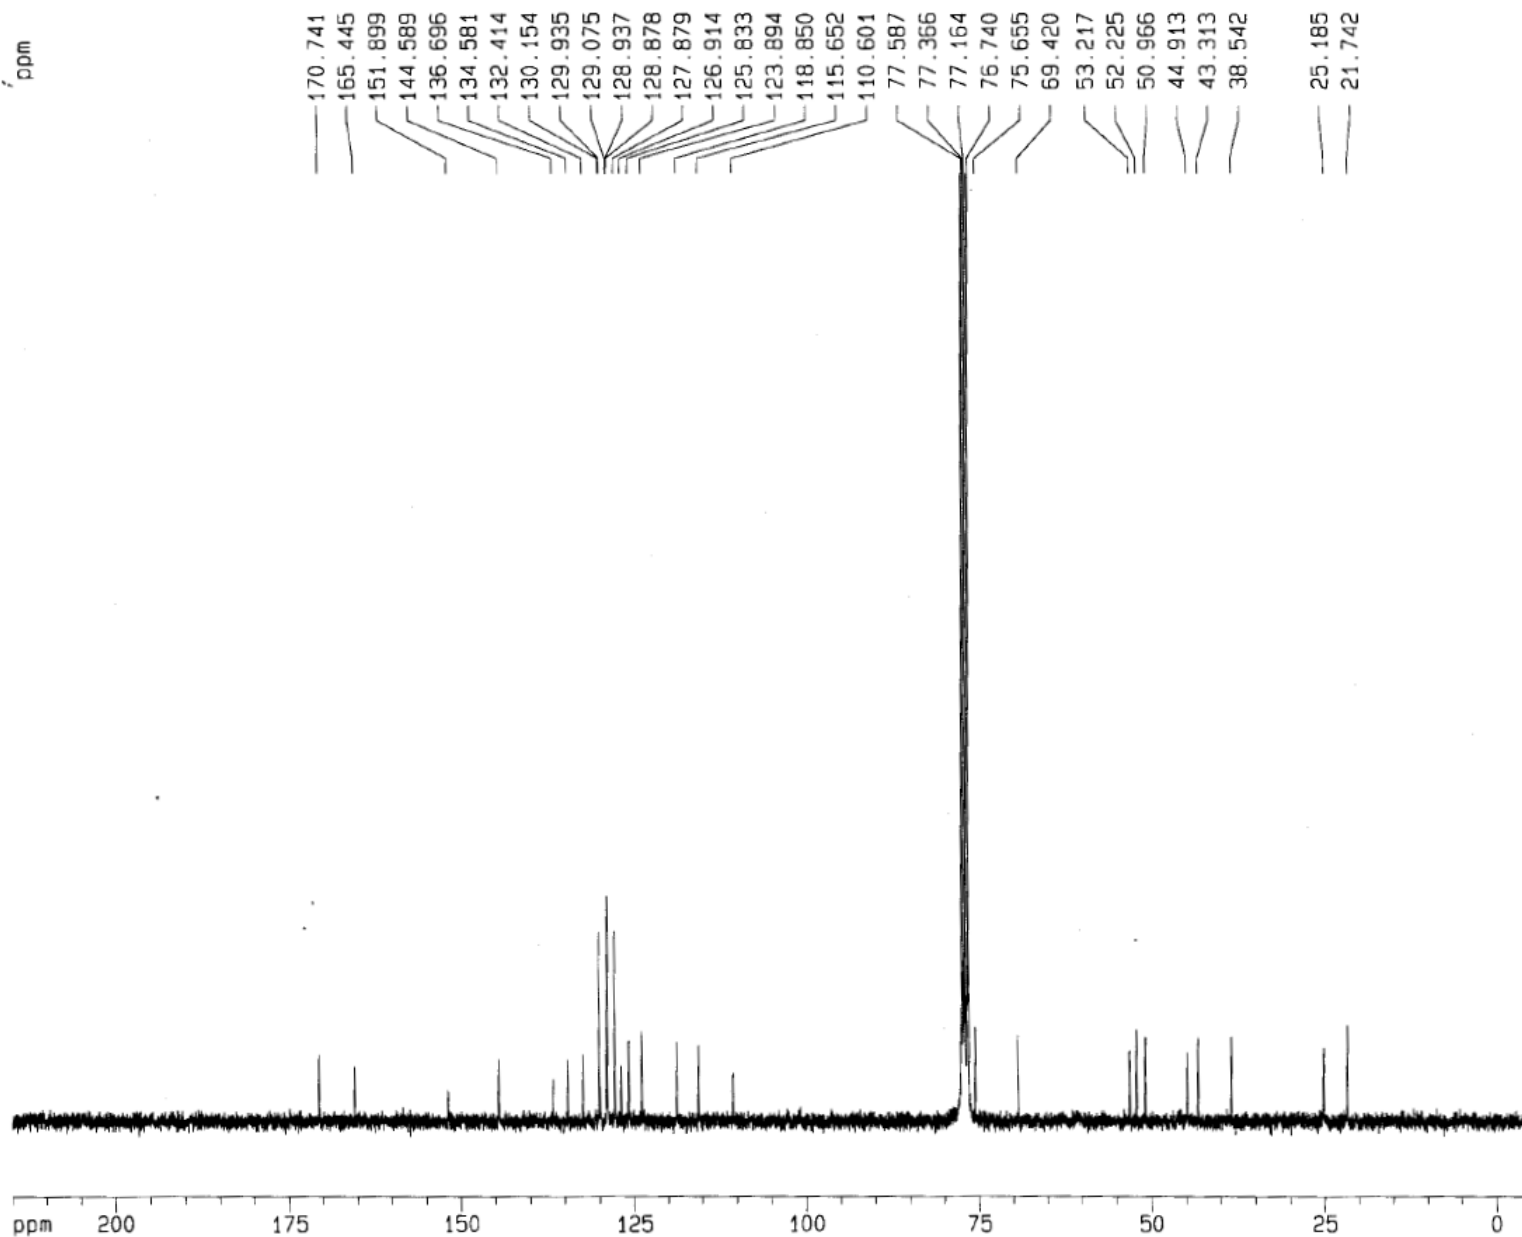

Current Data Parameters  
 NAME 092612FY0-19C  
 EXPNO 1  
 PROCNO 1

F2 - Acquisition Parameters  
 Date\_ 20120927  
 Time 6.39  
 INSTRUM spect  
 PROBHD 5 mm QNP 1H/1  
 PULPROG zgpg30  
 TD 65536  
 SOLVENT CDCl3  
 NS 7168  
 DS 4  
 SWH 18796.992 Hz  
 FIDRES 0.286819 Hz  
 AQ 1.7433076 sec  
 RG 812.7  
 DW 26.600 usec  
 DE 6.00 usec  
 TE 300.0 K  
 D1 2.00000000 sec  
 D11 0.03000000 sec  
 D12 0.00002000 sec

----- CHANNEL f1 -----  
 NUC1 13C  
 P1 5.25 usec  
 PL1 -6.00 dB  
 SF01 75.4106357 MHz

----- CHANNEL f2 -----  
 CPDPRG2 waltz16  
 NUC2 1H  
 PCPD2 115.00 usec  
 PL2 0.00 dB  
 PL12 19.70 dB  
 PL13 19.70 dB  
 SF02 299.8711995 MHz

F2 - Processing parameters  
 SI 32768  
 SF 75.4023625 MHz  
 WDW EM  
 SSB 0  
 LB 1.00 Hz  
 GB 0  
 PC 1.40

1D NMR plot parameters  
 CX 20.00 cm  
 F1P 215.000 ppm  
 F1 16211.51 Hz  
 F2P -5.000 ppm  
 F2 -377.01 Hz  
 PPMCM 11.00000 ppm/cm  
 HZCM 829.42596 Hz/cm

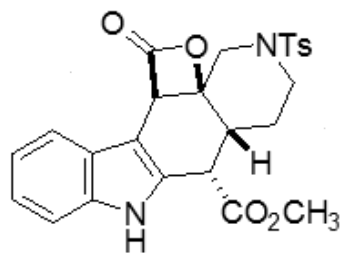

36

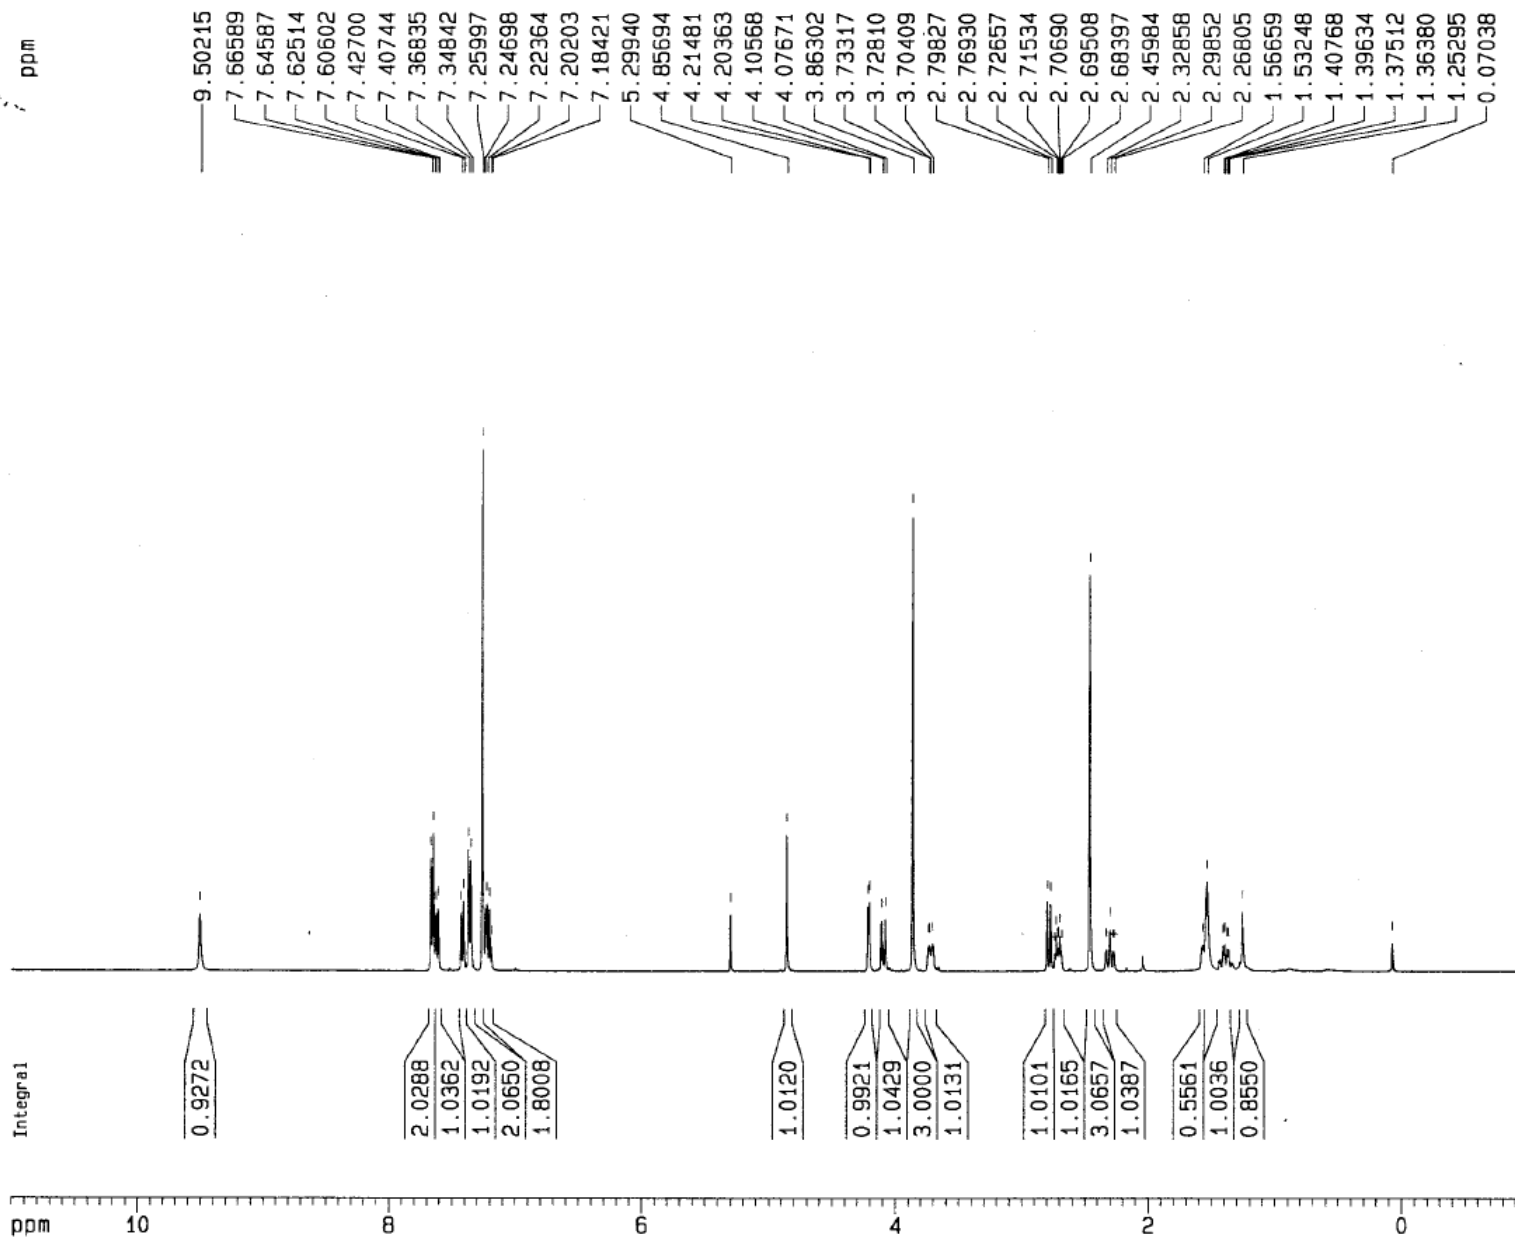

Current Data Parameters  
 NAME 092612FY0-20  
 EXPNO 1  
 PROCNO 1

F2 - Acquisition Parameters  
 Date\_ 20120926  
 Time 22.45  
 INSTRUM spect  
 PROBHD 5 mm BBI 1H-  
 PULPROG zg30  
 TD 65536  
 SOLVENT CDCl3  
 NS 16  
 DS 2  
 SWH 8278.146 Hz  
 FIDRES 0.126314 Hz  
 AQ 3.9584243 sec  
 RG 574.7  
 DW 60.400 usec  
 DE 6.00 usec  
 TE 300.0 K  
 D1 1.00000000 sec

===== CHANNEL f1 =====  
 NUC1 1H  
 P1 6.45 usec  
 PL1 0.00 dB  
 SF01 400.1324710 MHz

F2 - Processing parameters  
 SI 32768  
 SF 400.1300096 MHz  
 WDW EM  
 SSB 0  
 LB 0.30 Hz  
 GB 0  
 PC 1.00

1D NMR plot parameters  
 CX 20.00 cm  
 F1P 11.000 ppm  
 F1 4401.43 Hz  
 F2P -1.000 ppm  
 F2 -400.13 Hz  
 PPMCM 0.60000 ppm/cm  
 HZCM 240.07800 Hz/cm

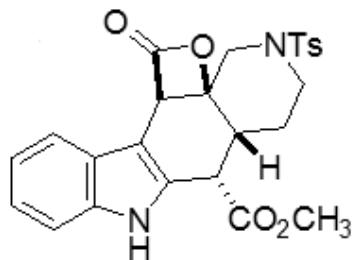

36

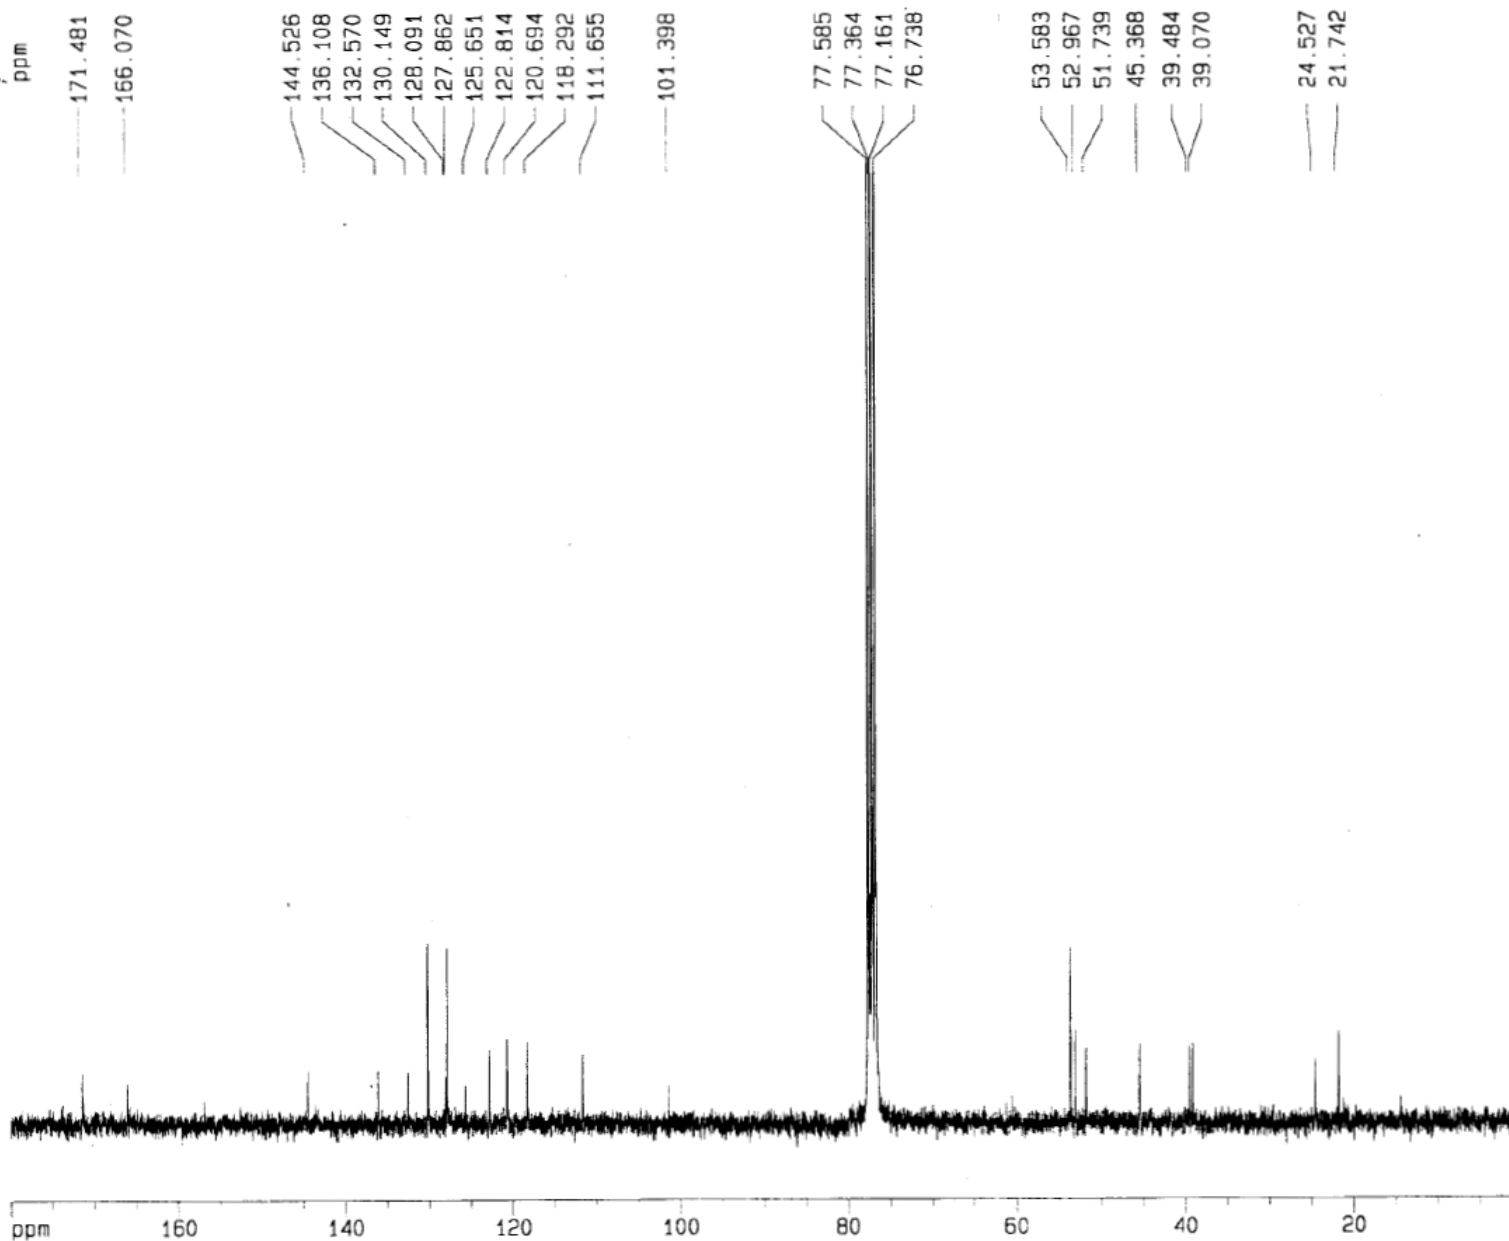

Current Data Parameters  
 NAME 092312FYGcpd20  
 EXPNO 1  
 PROCNO 1

## F2 - Acquisition Parameters

Date\_ 20120924  
 Time 9.30  
 INSTRUM spect  
 PROBHD 5 mm Multinu  
 PULPROG zgpg30  
 TD 65536  
 SOLVENT CDC13  
 NS 19456  
 DS 4  
 SWH 18832.393 Hz  
 FIDRES 0.287360 Hz  
 AQ 1.7400308 sec  
 RG 11585.2  
 DW 26.550 usec  
 DE 6.00 usec  
 TE 300.0 K  
 D1 2.0000000 sec  
 d11 0.0300000 sec  
 d12 0.0000200 sec

----- CHANNEL f1 -----  
 NUC1 13C  
 P1 9.75 usec  
 PL1 0.00 dB  
 SF01 75.4760200 MHz

----- CHANNEL f2 -----  
 CPDPRG2 waltz16  
 NUC2 1H  
 PCPD2 110.00 usec  
 PL2 0.00 dB  
 PL12 17.50 dB  
 PL13 17.50 dB  
 SF02 300.1312005 MHz

## F2 - Processing parameters

SI 32768  
 SF 75.4677382 MHz  
 WDW EM  
 SSB 0  
 LB 1.00 Hz  
 GB 0  
 PC 1.40

## 1D NMR plot parameters

CX 20.00 cm  
 F1P 180.000 ppm  
 F1 13584.19 Hz  
 F2P 0.000 ppm  
 F2 0.00 Hz  
 PPNCM 9.00000 ppm/cm  
 HZCM 679.20959 Hz/cm

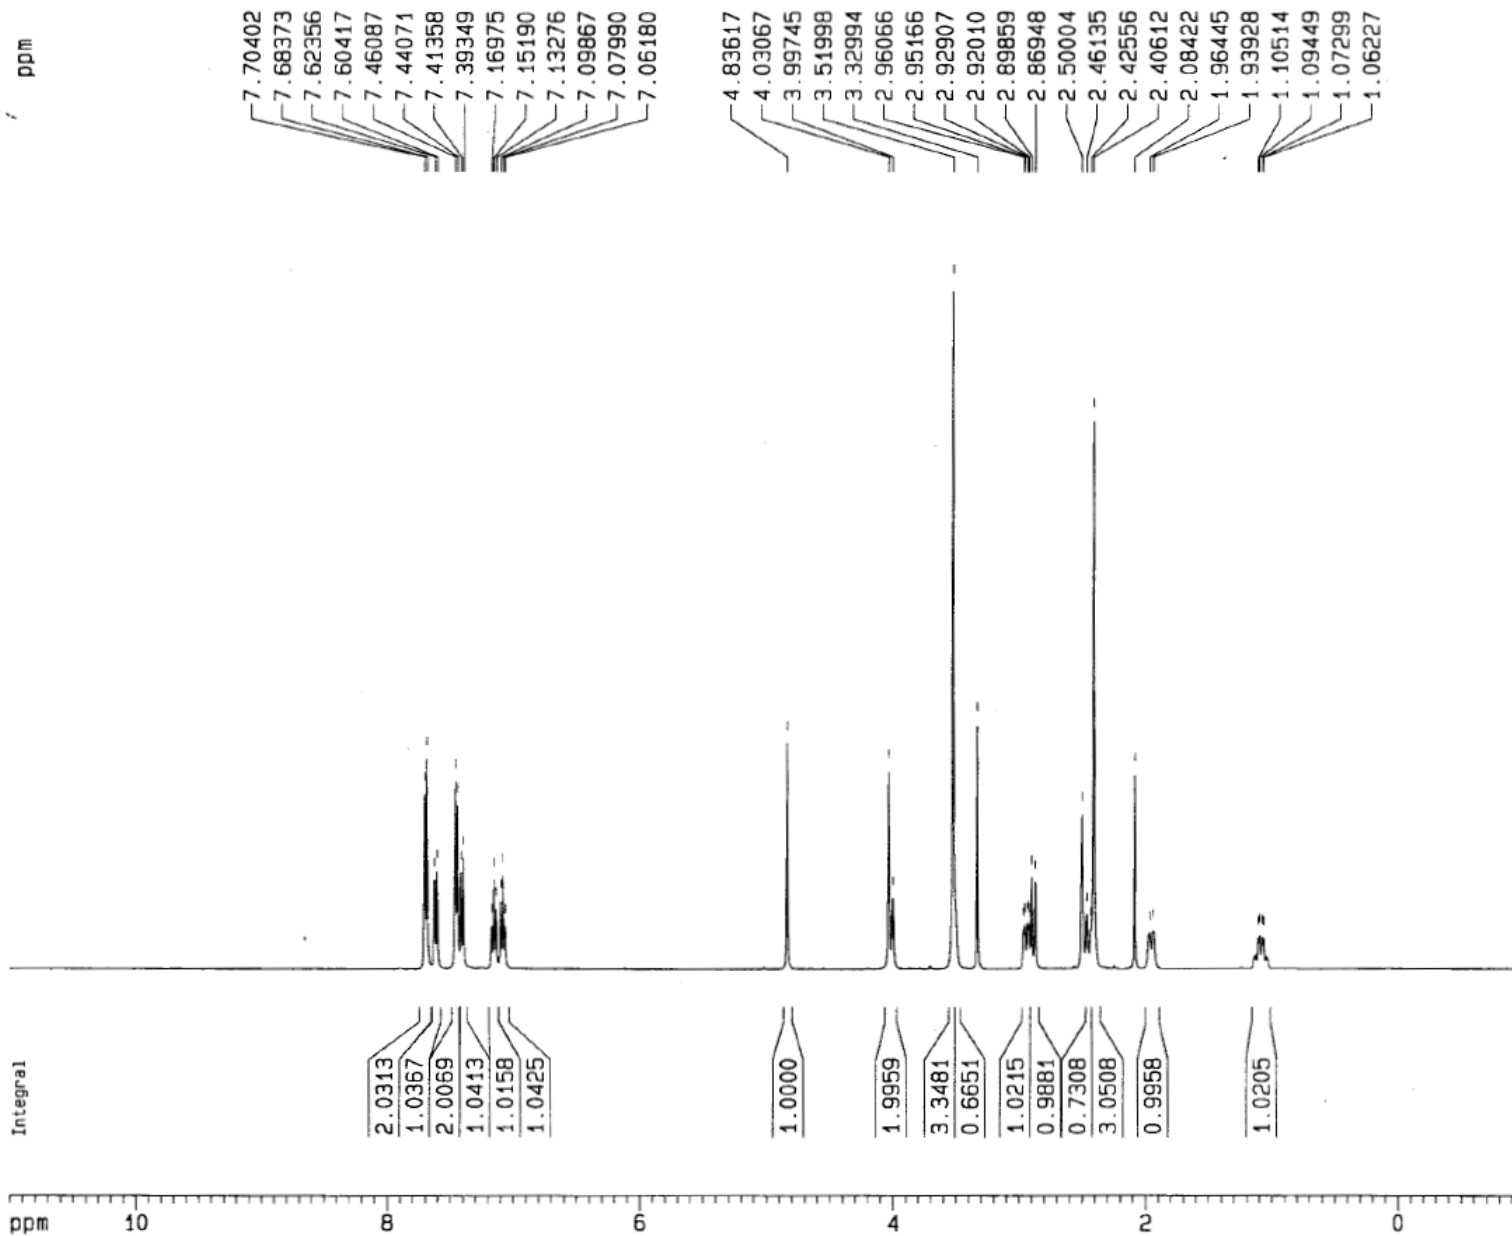

## Current Data Parameters

NAME 092612FYQ-21  
EXPNO 5  
PROCNO 1

## F2 - Acquisition Parameters

Date\_ 20120926  
Time 23.04  
INSTRUM spect  
PROBHD 5 mm BBI 1H-  
PULPROG zg30  
TD 65536  
SOLVENT DMSO  
NS 16  
DS 2  
SWH 8278.146 Hz  
FIDRES 0.126314 Hz  
AQ 3.9584243 sec  
RG 362  
DW 60.400 usec  
DE 6.00 usec  
TE 300.0 K  
D1 1.00000000 sec

## ----- CHANNEL f1 -----

NUC1 1H  
P1 6.45 usec  
PL1 0.00 dB  
SF01 400.1324710 MHz

## F2 - Processing parameters

SI 32768  
SF 400.1300029 MHz  
WDW EM  
SSB 0  
LB 0.30 Hz  
GB 0  
PC 1.00

## 1D NMR plot parameters

CX 20.00 cm  
F1P 11.000 ppm  
F1 4401.43 Hz  
F2P -1.000 ppm  
F2 -400.13 Hz  
PPMCM 0.60000 ppm/cm  
HZCM 240.07800 Hz/cm



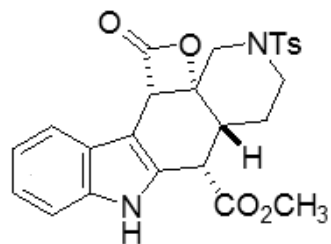

38

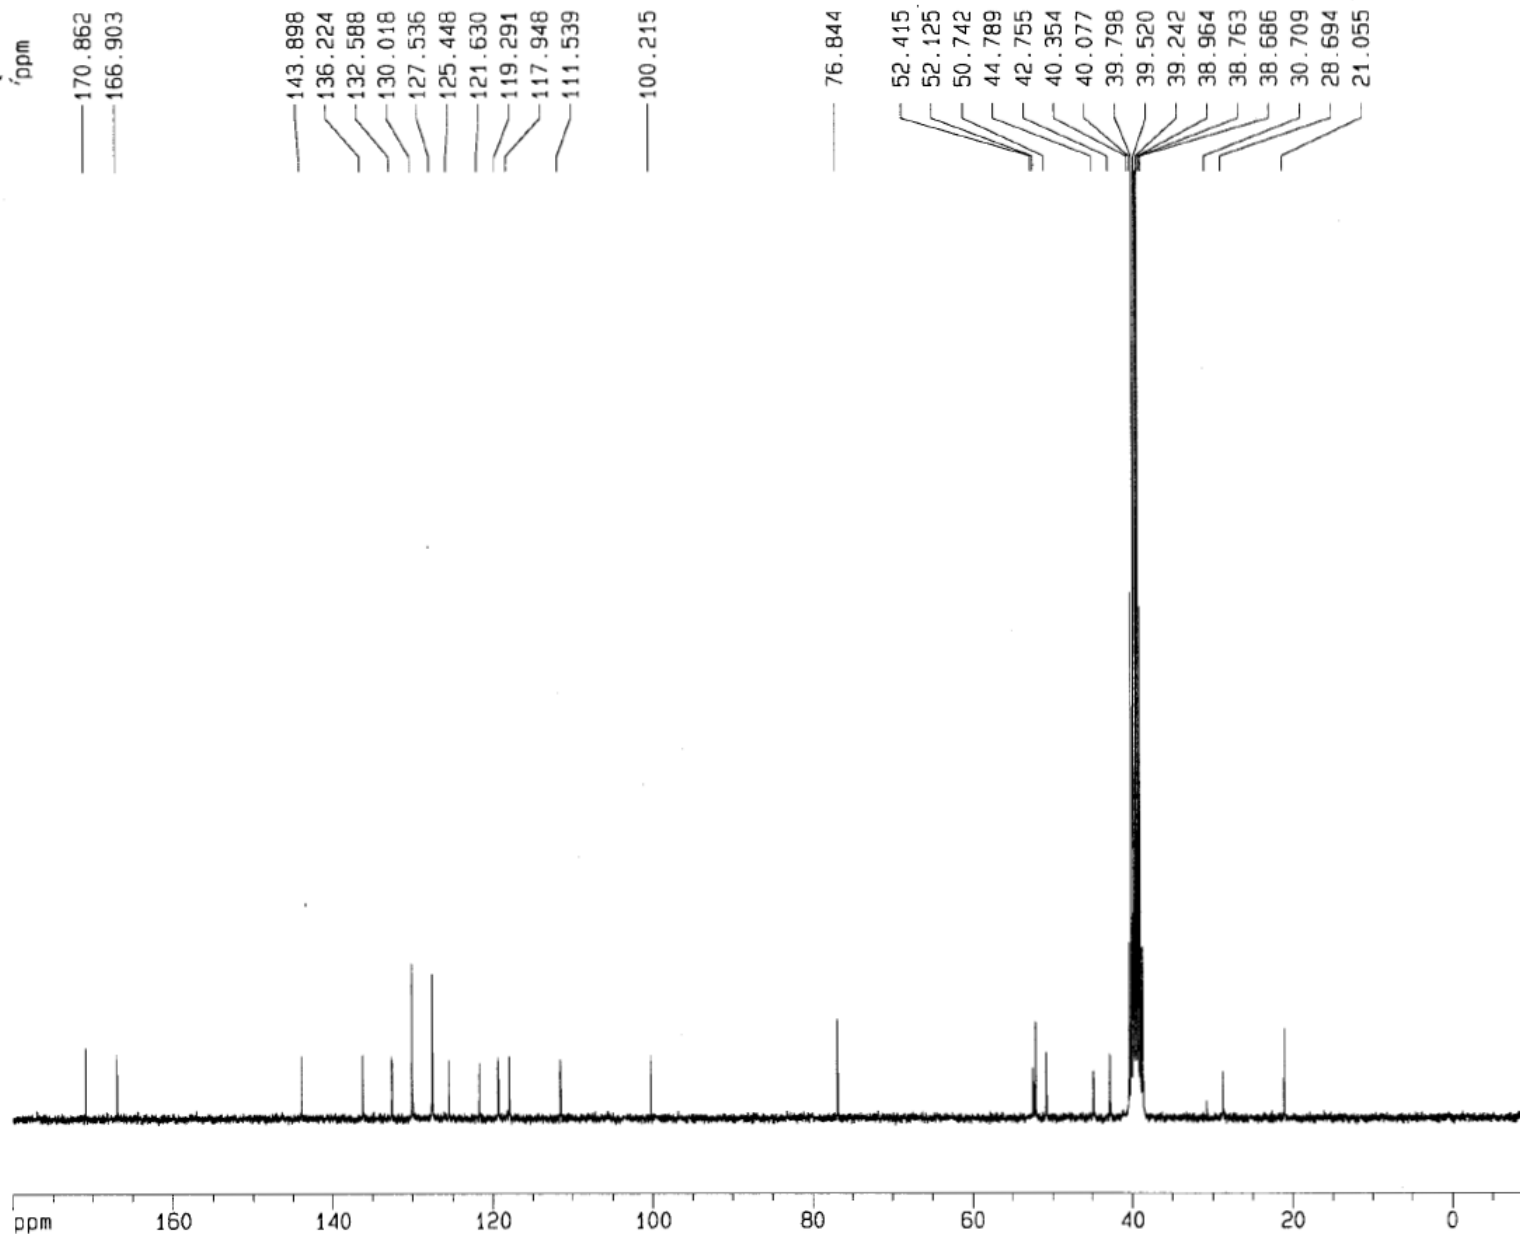

## Current Data Parameters

NAME 092612FYQ-21  
EXPNO 2  
PROCNO 1

## F2 - Acquisition Parameters

Date\_ 20120926  
Time 23.03  
INSTRUM spect  
PROBHD 5 mm GNP 1H/1  
PULPROG zgpg30  
TD 65536  
SOLVENT DMSO  
NS 1375  
DS 4  
SWH 18796.992 Hz  
FIDRES 0.286819 Hz  
AQ 1.7433076 sec  
RG 512  
DW 26.600 usec  
DE 6.00 usec  
TE 300.0 K  
D1 2.0000000 sec  
D11 0.0300000 sec  
D12 0.0000200 sec

## ===== CHANNEL f1 =====

NUC1 13C  
P1 5.25 usec  
PL1 -6.00 dB  
SFO1 75.4106357 MHz

## ===== CHANNEL f2 =====

CPDPRG2 waltz16  
NUC2 1H  
PCPD2 115.00 usec  
PL2 0.00 dB  
PL12 19.70 dB  
PL13 19.70 dB  
SFO2 299.8711995 MHz

## F2 - Processing parameters

SI 32768  
SF 75.4024070 MHz  
WDW EM  
SSB 0  
LB 1.00 Hz  
GB 0  
PC 1.40

## 1D NMR plot parameters

CX 20.00 cm  
F1P 180.000 ppm  
F1 13572.43 Hz  
F2P -10.000 ppm  
F2 -754.02 Hz  
PPMCM 9.50000 ppm/cm  
HZCM 716.32288 Hz/cm

ppm

Integral

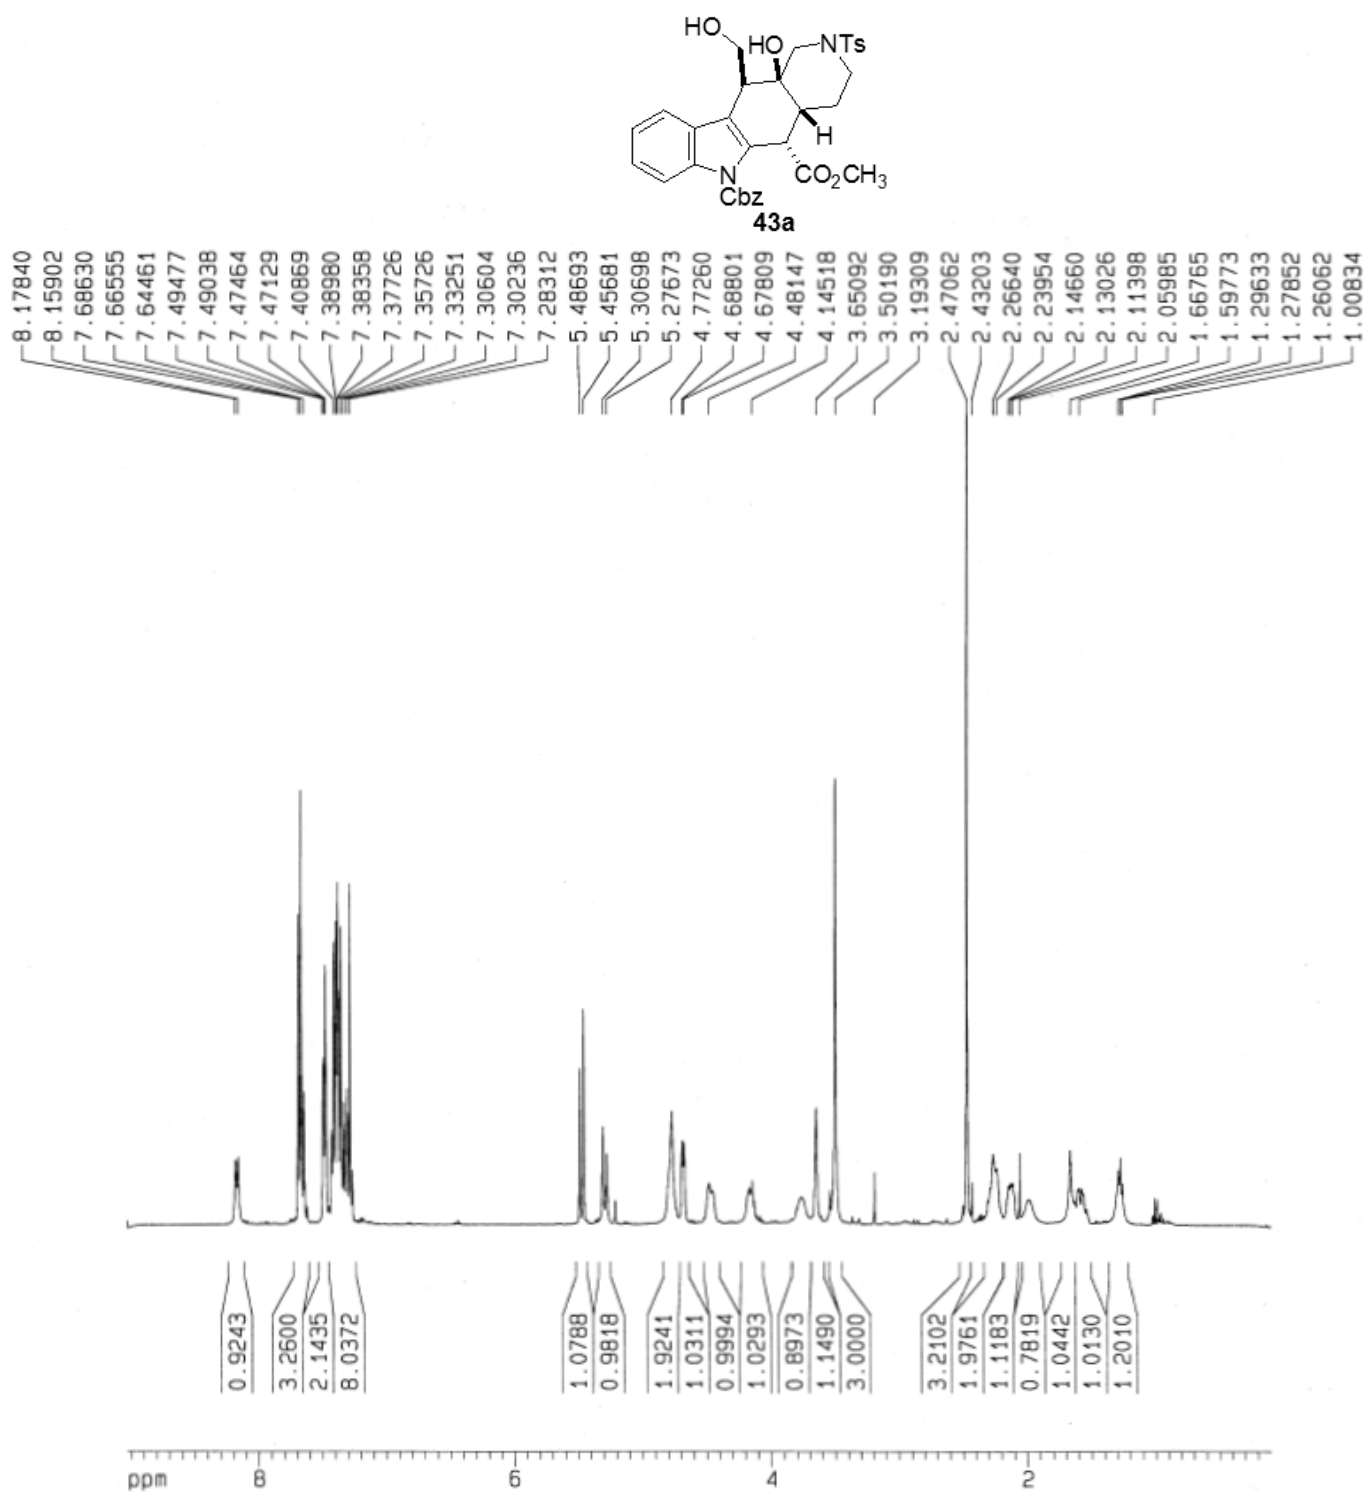

Current Data Parameters  
 NAME 042110mmm5133  
 EXPNO 1  
 PROCNO 1

F2 - Acquisition Parameters  
 Date\_ 20100421  
 Time 19.57  
 INSTRUM spect  
 PROBHD 5 mm BBI 1H-B  
 PULPROG zg30  
 TD 65536  
 SOLVENT CDC13  
 NS 16  
 DS 2  
 SWH 3571.428 Hz  
 FIDRES 0.054496 Hz  
 AQ 9.1750898 sec  
 RG 35.9  
 DW 140.000 usec  
 DE 6.00 usec  
 TE 300.0 K  
 D1 1.00000000 sec

===== CHANNEL f1 =====  
 NUC1 1H  
 P1 29.70 usec  
 PL1 0.00 dB  
 SF01 400.1318266 MHz

F2 - Processing parameters  
 SI 32768  
 SF 400.1300000 MHz  
 WDW no  
 SSB 0  
 LB 0.00 Hz  
 GB 0  
 PC 1.00

1D NMR plot parameters  
 CX 20.00 cm  
 F1P 11.000 ppm  
 F1 4401.43 Hz  
 F2P -1.000 ppm  
 F2 -400.13 Hz  
 PPMCM 0.60000 ppm/cm  
 HZCM 240.07800 Hz/cm

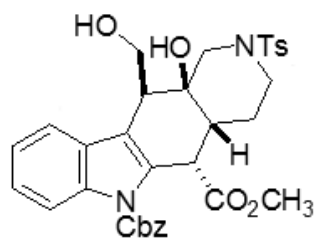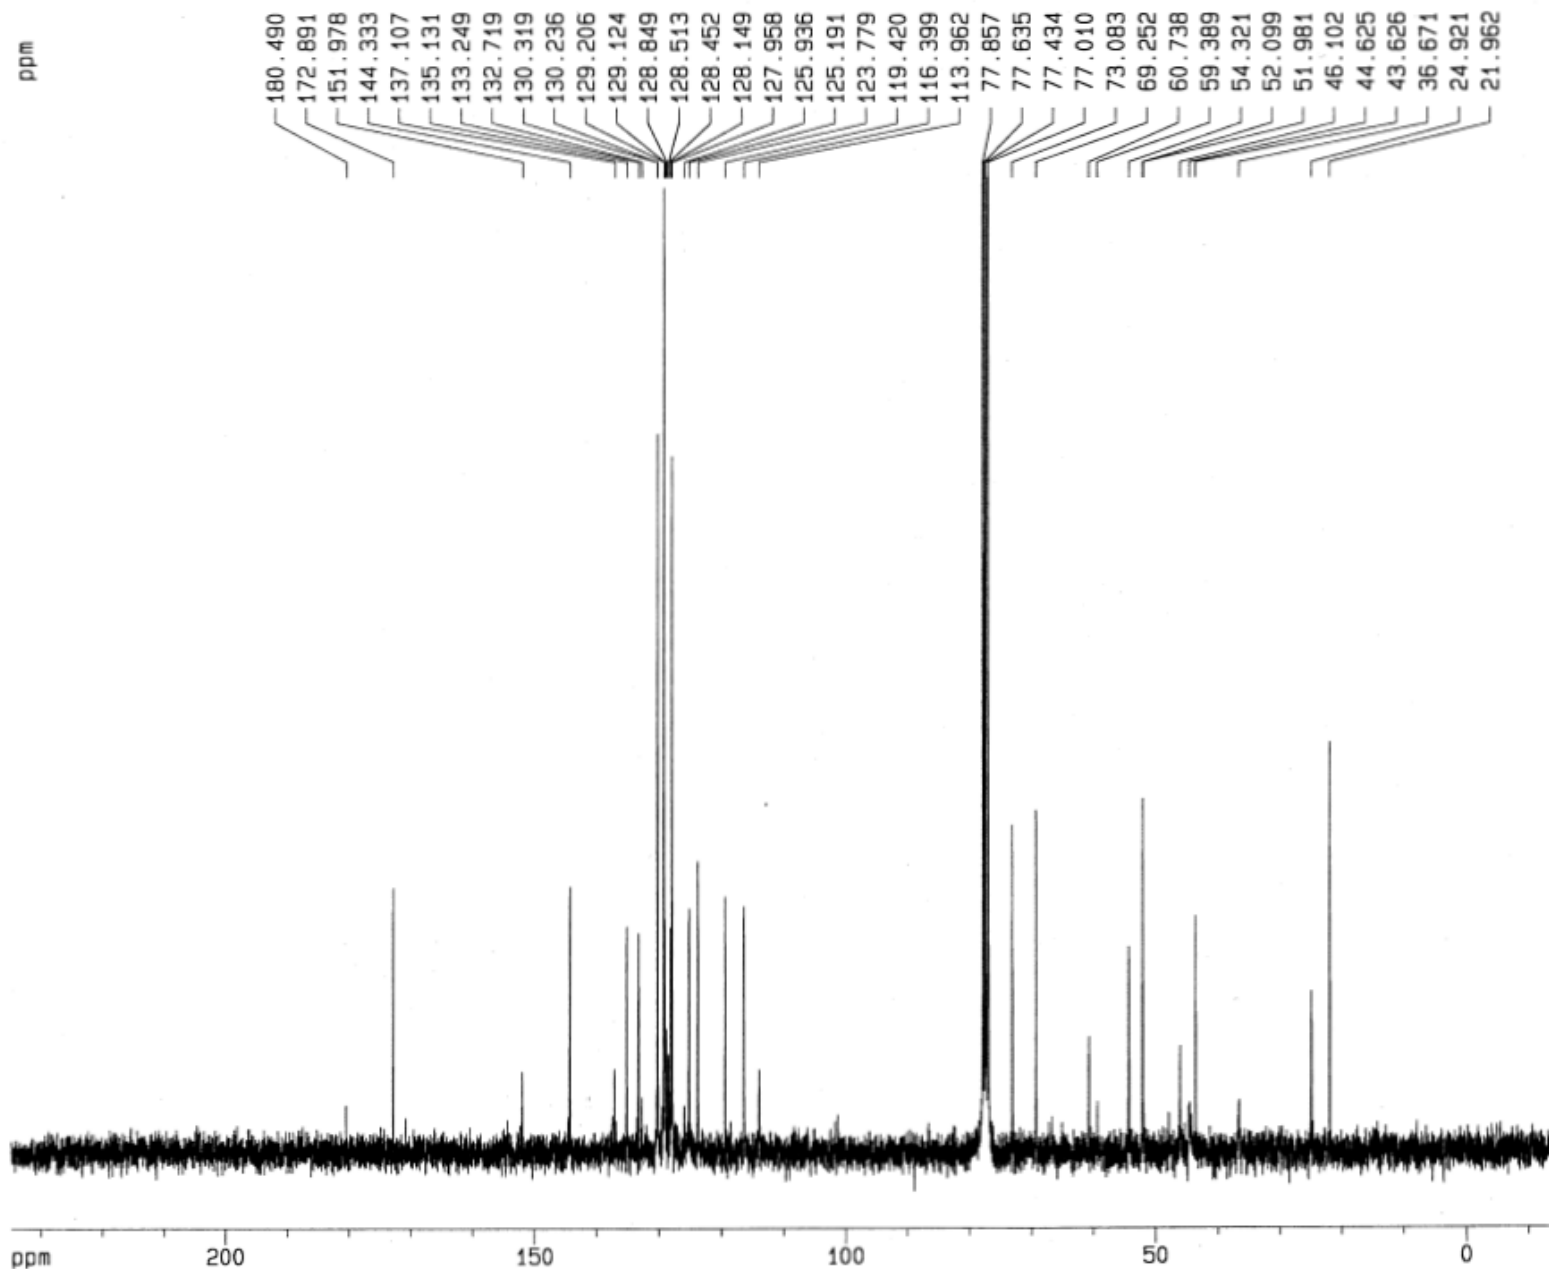

Current Data Parameters  
 NAME 042010d01  
 EXPNO 3  
 PROCNO 1

F2 - Acquisition Parameters  
 Date\_ 20100420  
 Time 19.29  
 INSTRUM spect  
 PROBHD 5 mm Multinu  
 PULPROG zgpg30  
 TD 32768  
 SOLVENT CDC13  
 NS 3650  
 DS 4  
 SWH 18832.393 Hz  
 FIDRES 0.574719 Hz  
 AQ 0.8700404 sec  
 RG 11585.2  
 DW 26.550 usec  
 DE 6.00 usec  
 TE 300.0 K  
 D1 2.00000000 sec  
 d11 0.03000000 sec  
 d12 0.00002000 sec

----- CHANNEL f1 -----  
 NUC1 13C  
 P1 11.80 usec  
 PL1 0.00 dB  
 SF01 75.4760200 MHz

----- CHANNEL f2 -----  
 CPDPRG2 waltz16  
 NUC2 1H  
 PCPD2 110.00 usec  
 PL2 0.00 dB  
 PL12 17.50 dB  
 PL13 17.50 dB  
 SF02 300.1312005 MHz

F2 - Processing parameters  
 SI 32768  
 SF 75.4677190 MHz  
 WDW EM  
 SSB 0  
 LB 1.00 Hz  
 GB 0  
 PC 1.40

1D NMR plot parameters  
 CX 20.00 cm  
 F1P 234.765 ppm  
 F1 17717.15 Hz  
 F2P -14.778 ppm  
 F2 -1115.24 Hz  
 PPMCM 12.47712 ppm/cm  
 HZCM 941.61951 Hz/cm

S32

minor diol

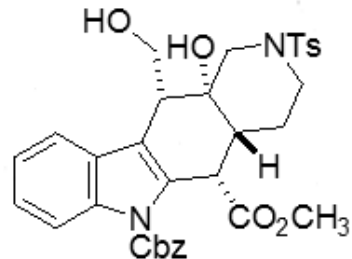

ppm

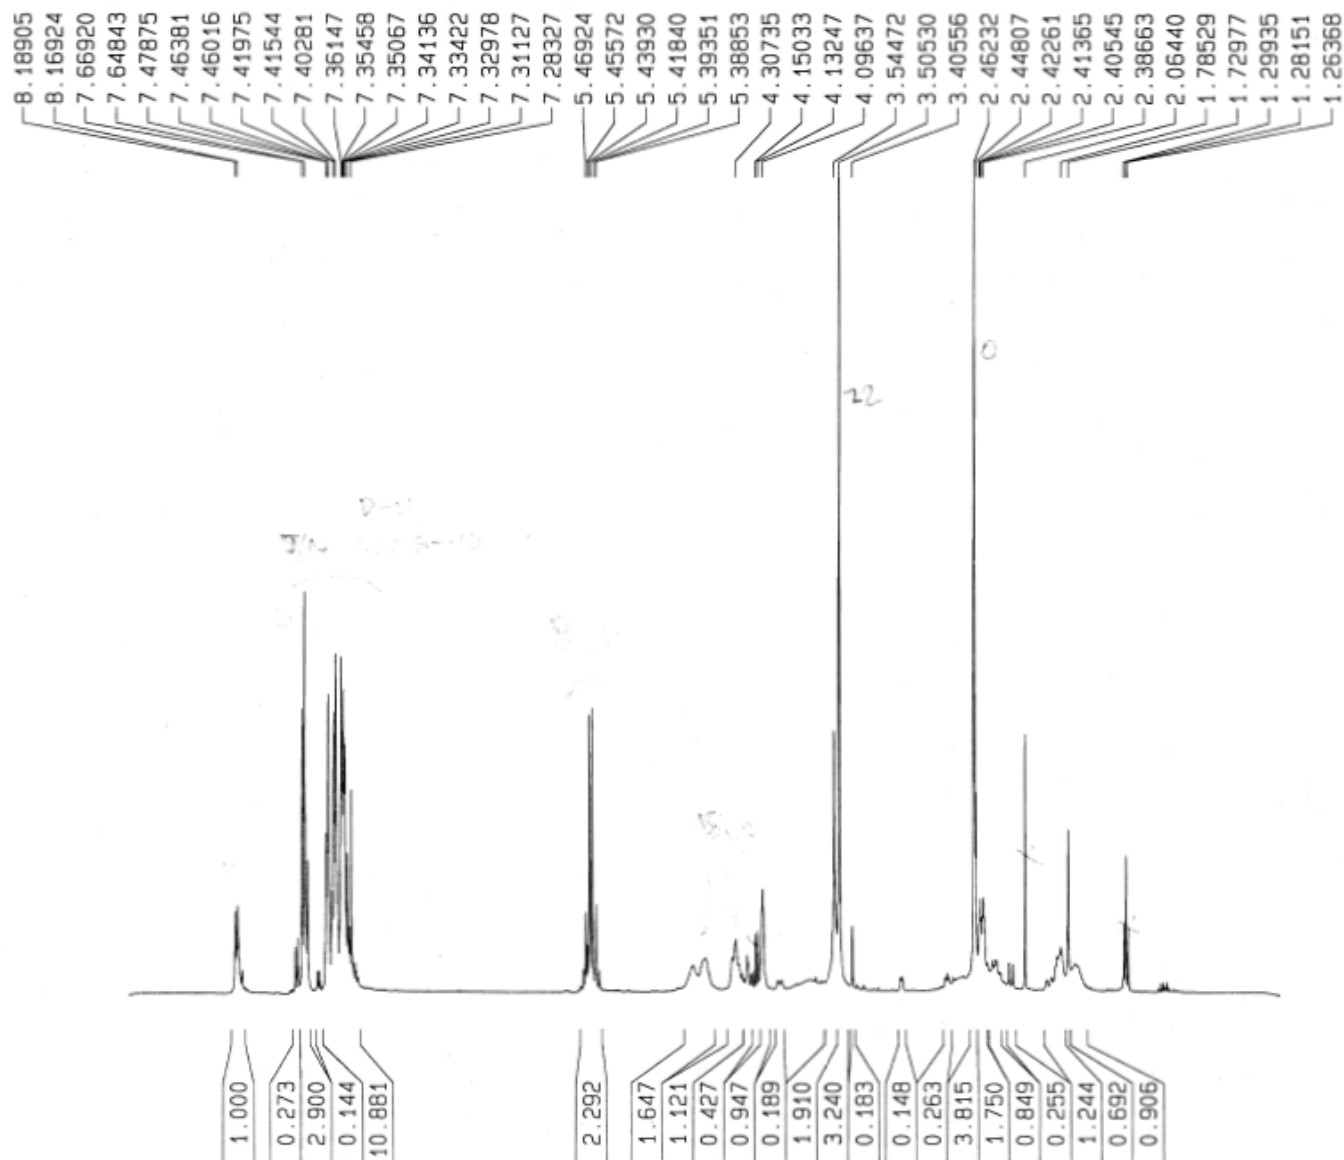

## Current Data Parameters

NAME 092910mndiol  
EXPNO 1  
PROCNO 1

## F2 - Acquisition Parameters

Date\_ 20100929  
Time 18.26  
INSTRUM spect  
PROBHD 5 mm BBI 1H-B  
PULPROG zg30  
TD 65536  
SOLVENT CDC13  
NS 16  
DS 2  
SWH 3571.428 Hz  
FIDRES 0.054496 Hz  
AQ 9.1750998 sec  
RG 35.9  
DW 140.000 usec  
DE 6.00 usec  
TE 300.0 K  
D1 1.00000000 sec

## ----- CHANNEL f1 -----

NUC1 1H  
P1 30.15 usec  
PL1 0.00 dB  
SF01 400.1318217 MHz

## F2 - Processing parameters

SI 32768  
SF 400.1300000 MHz  
WDW no  
SSB 0  
LB 0.00 Hz  
GB 0  
PC 1.00

## 1D NMR plot parameters

CX 20.00 cm  
F1P 11.000 ppm  
F1 4401.43 Hz  
F2P -1.000 ppm  
F2 -400.13 Hz  
PPMCM 0.60000 ppm/cm  
HZCM 240.07800 Hz/cm

Integral

ppm

8

6

4

2

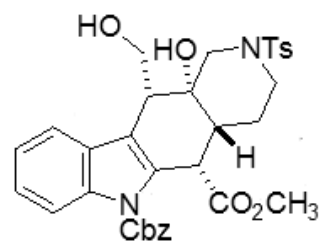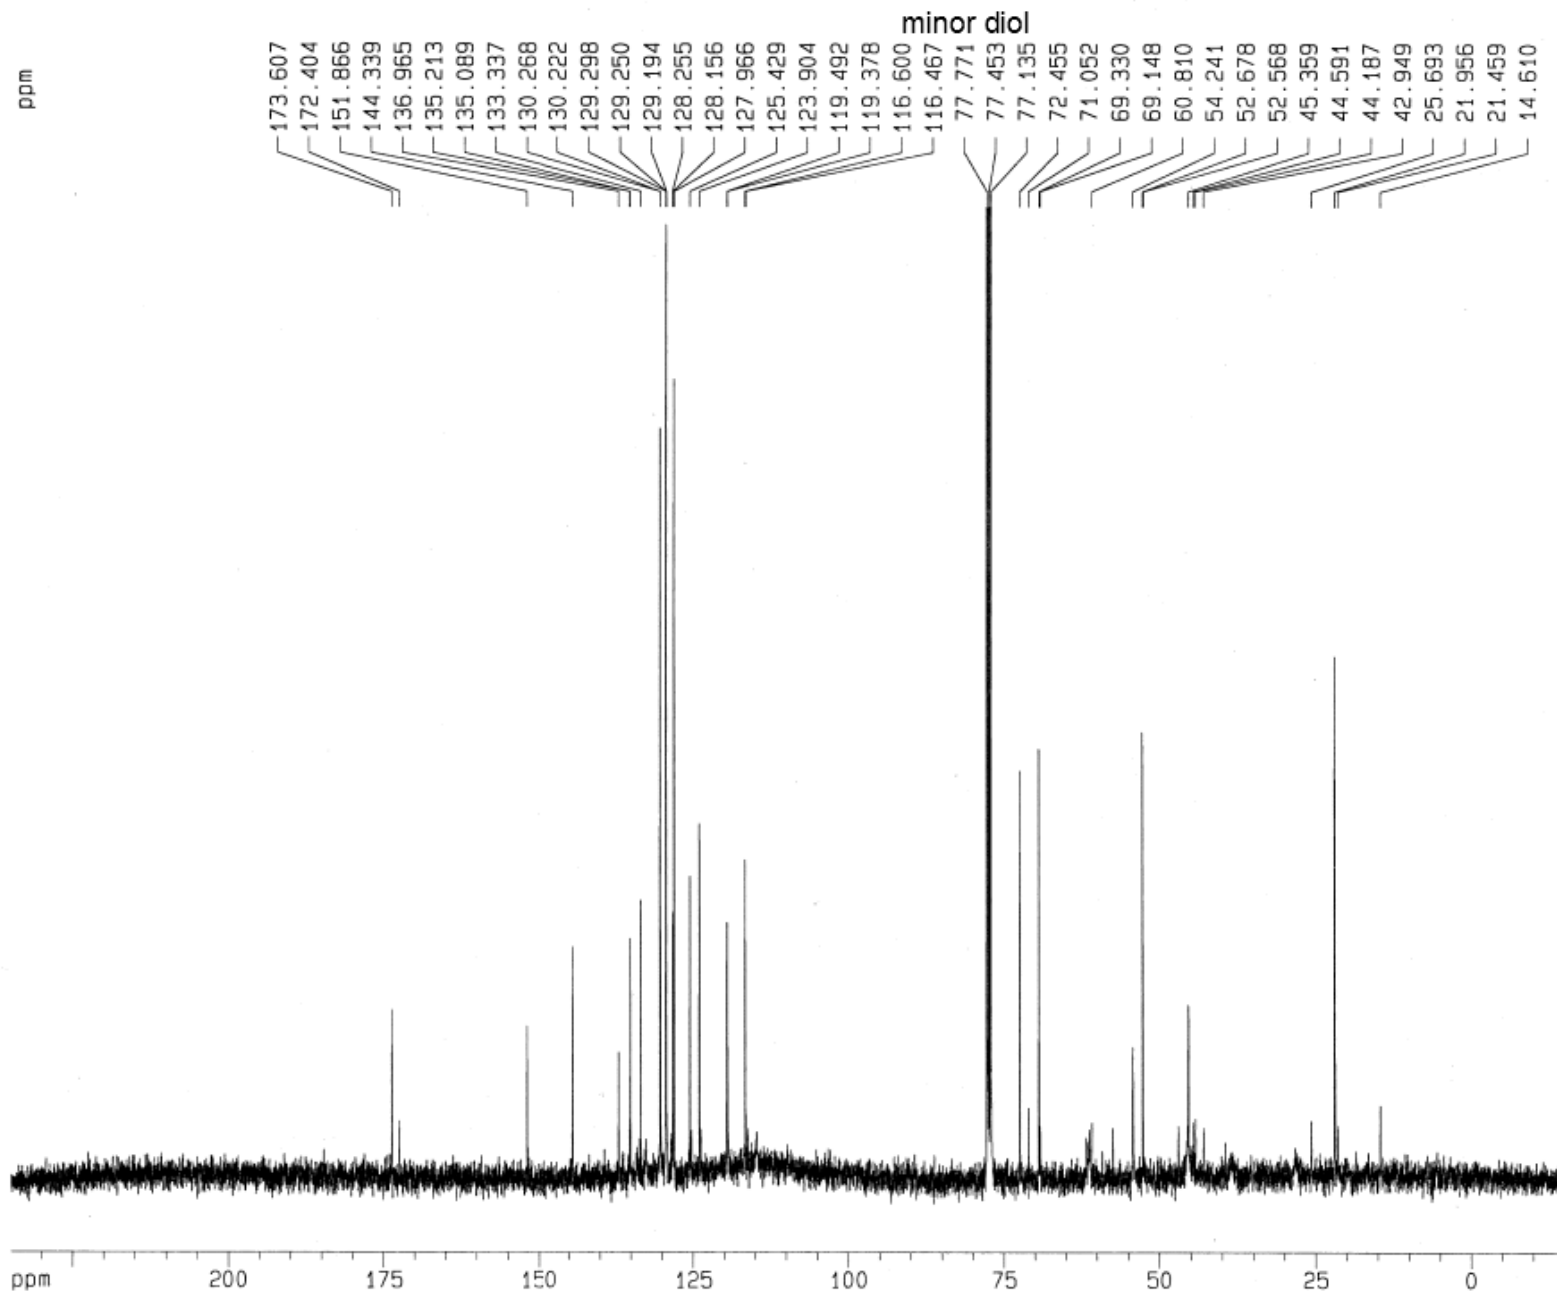

Current Data Parameters  
NAME 092910mndiol  
EXPNO 2  
PROCNO 1

F2 - Acquisition Parameters  
Date\_ 20100929  
Time 21.16  
INSTRUM spect  
PROBHD 5 mm BBI 1H-B  
PULPROG zgpg30  
TD 65536  
SOLVENT CDCl3  
NS 3072  
DS 4  
SWH 25125.629 Hz  
FIDRES 0.383387 Hz  
AQ 1.3042164 sec  
RG 16384  
DW 19.900 usec  
DE 6.00 usec  
TE 300.0 K  
D1 2.00000000 sec  
d11 0.03000000 sec  
d12 0.00002000 sec

----- CHANNEL f1 -----  
NUC1 13C  
P1 16.35 usec  
PL1 -6.00 dB  
SFO1 100.6237959 MHz

----- CHANNEL f2 -----  
CPDPRG2 waltz16  
NUC2 1H  
PCPD2 114.00 usec  
PL2 0.00 dB  
PL12 24.00 dB  
PL13 24.00 dB  
SFO2 400.1316005 MHz

F2 - Processing parameters  
SI 32768  
SF 100.6127290 MHz  
WDW EM  
SSB 0  
LB 1.00 Hz  
GB 0  
PC 1.40

1D NMR plo: parameters  
CX 20.00 cm  
F1P 234.858 ppm  
F1 23629.72 Hz  
F2P -14.868 ppm  
F2 -1495.91 Hz  
PPMCM 12.48631 ppm/cm  
HZCM 1256.28149 Hz/cm

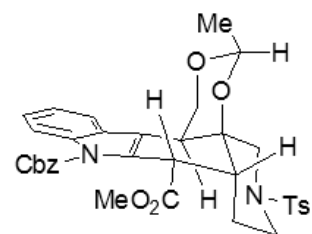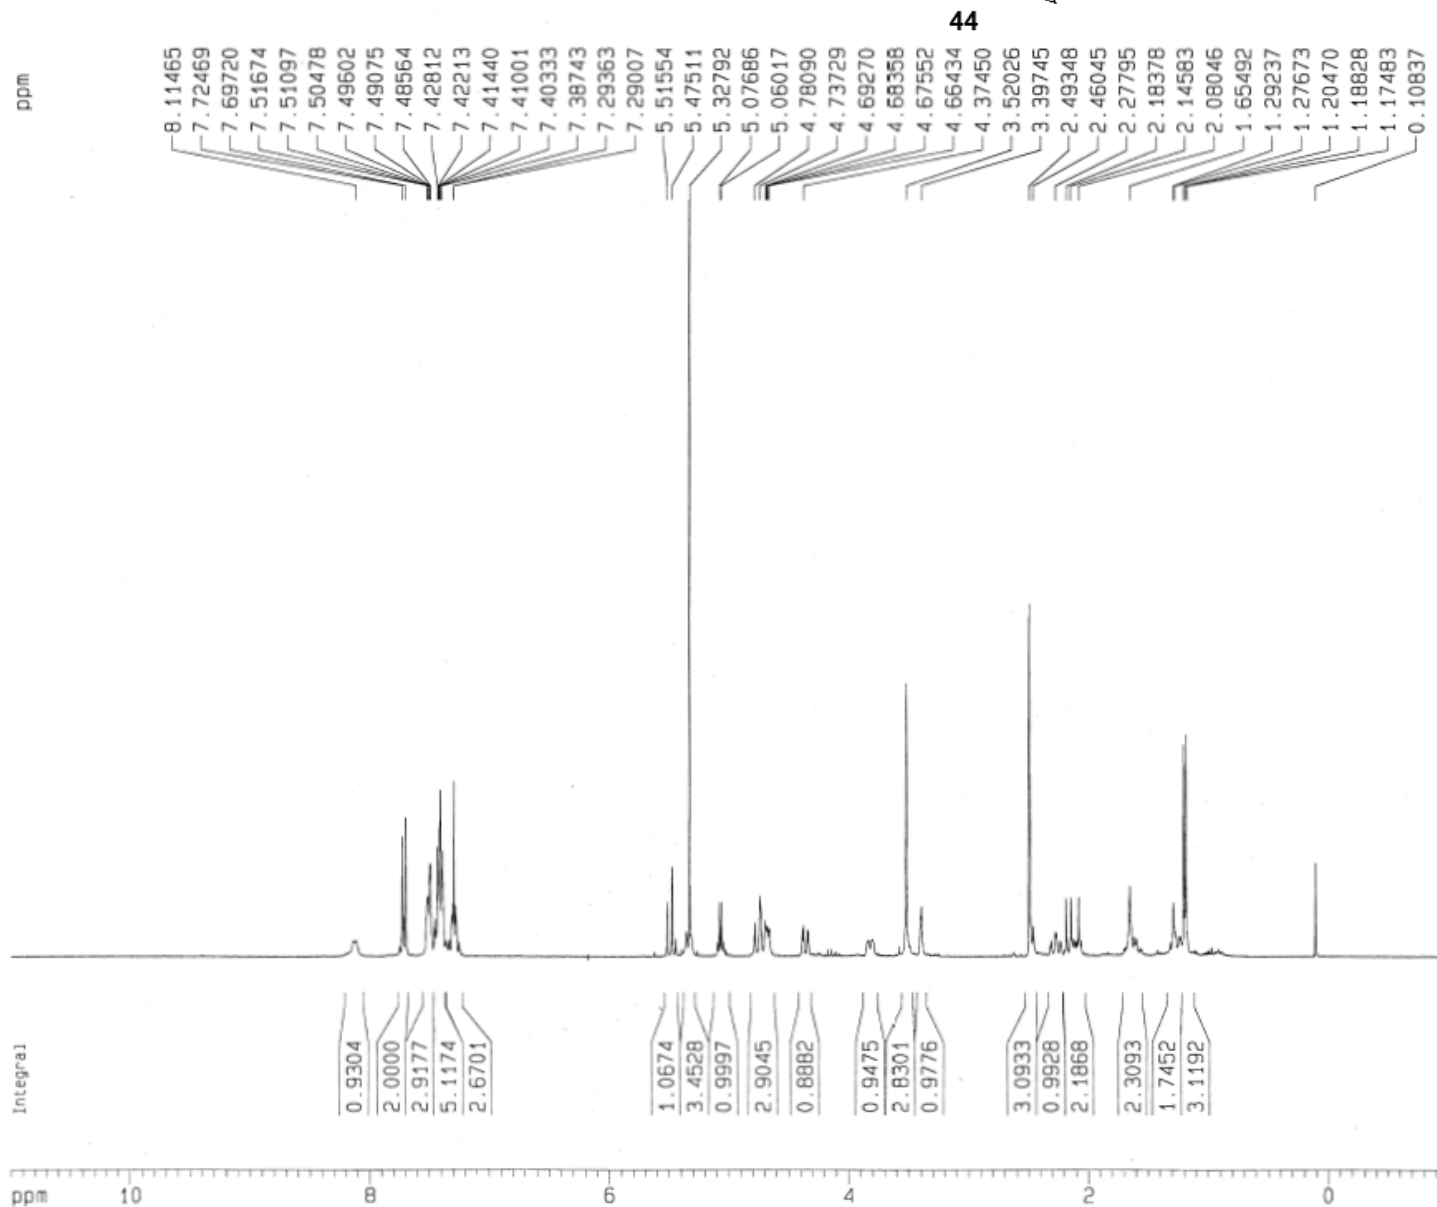

## Current Data Parameters

NAME 081710mm5261  
EXPNO 1  
PROCNO 1

## F2 - Acquisition Parameters

Date\_ 20100817  
Time 15.19  
INSTRUM spect  
PROBHD 5 mm QNP 1H/1  
PULPROG zg30  
TD 24690  
SOLVENT CDCl3  
NS 16  
DS 2  
SWH 6172.839 Hz  
FIDRES 0.250014 Hz  
AQ 1.9999400 sec  
RG 512  
DK 81.000 usec  
DE 6.00 usec  
TE 300.0 K  
D1 1.00000000 sec

## ----- CHANNEL f1 -----

NUC1 1H  
P1 11.70 usec  
PL1 0.00 dB  
SFO1 299.8718518 MHz

## F2 - Processing parameters

SI 32768  
SF 299.8700000 MHz  
WDW no  
SSB 0  
LB 0.00 Hz  
GB 0  
PC 1.00

## 1D NMR plot parameters

CX 20.00 cm  
F1P 11.000 ppm  
F1 3298.57 Hz  
F2P -1.000 ppm  
F2 -299.87 Hz  
PPMCM 0.60000 ppm/cm  
HZCM 179.92200 Hz/cm

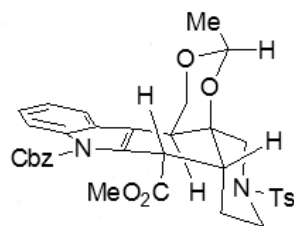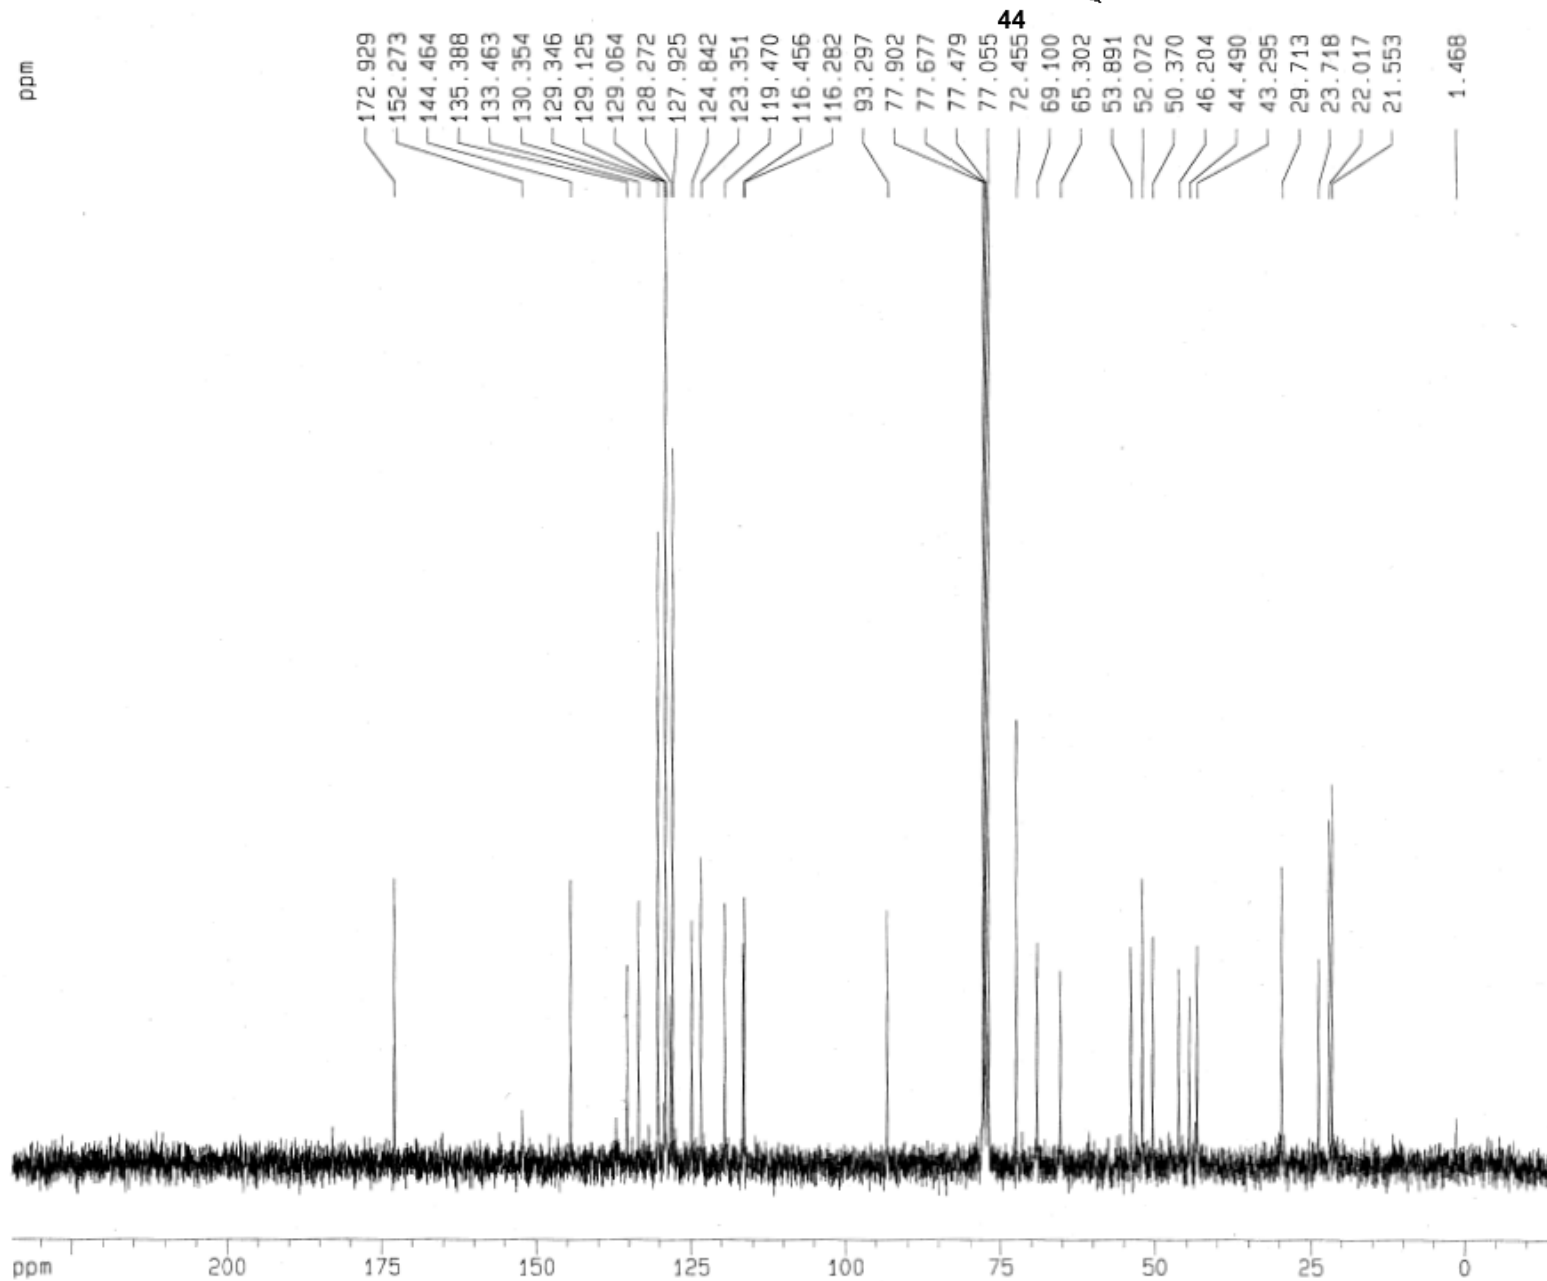

Current Data Parameters  
NAME 081710mm5261  
EXPNO 2  
PROCNO 1

F2 - Acquisition Parameters  
Date\_ 20100817  
Time 15.06  
INSTRUM spect  
PROBHD 5 mm QNP 1H/1  
PULPROG zgpg30  
TD 32768  
SOLVENT CDCl3  
NS 972  
DS 4  
SMH 18796.992 Hz  
FIDRES 0.573639 Hz  
AQ 0.8716788 sec  
RG 1024  
DW 25.600 usec  
DE 6.00 usec  
TE 300.0 K  
D1 2.0000000 sec  
D11 0.0300000 sec  
D12 0.0000200 sec

----- CHANNEL f1 -----  
NUC1 13C  
P1 5.40 usec  
PL1 -6.00 dB  
SF01 75.4106357 MHz

----- CHANNEL f2 -----  
CPDPRG2 waltz16  
NUC2 1H  
PCPD2 115.00 usec  
PL2 0.00 dB  
PL12 20.00 dB  
PL13 20.00 dB  
SF02 299.8711995 MHz

F2 - Processing parameters  
S1 32768  
SF 75.4023410 MHz  
WDW EM  
SSB 0  
LB 1.00 Hz  
GB 0  
PC 1.40

1D NMR plot parameters  
CX 20.00 cm  
F1P 234.651 ppm  
F1 17693.24 Hz  
F2P -14.638 ppm  
F2 -1103.75 Hz  
PPMCM 12.46446 ppm/cm  
HZCM 939.84955 Hz/cm

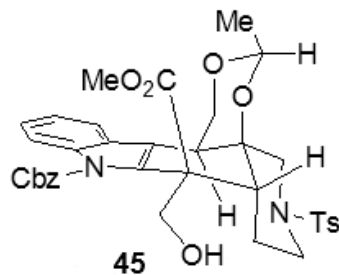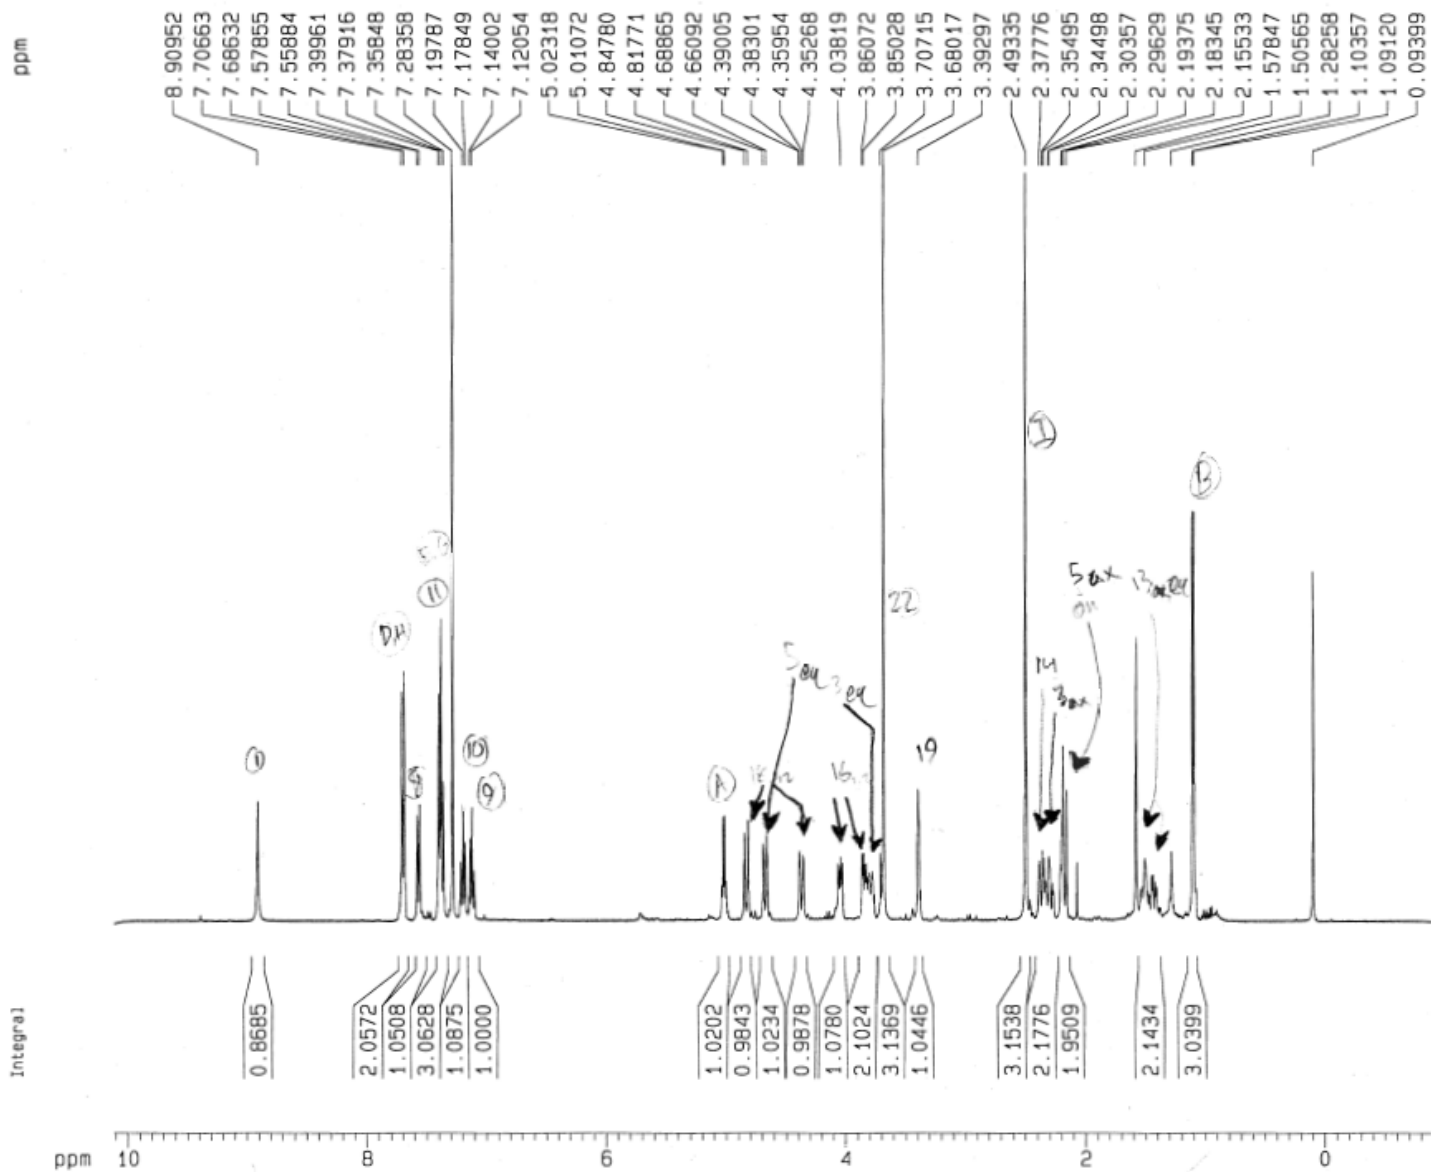

Current Data Parameters  
 NAME OB1910mm5i62  
 EXPNO 1  
 PROCNO 1

F2 - Acquisition Parameters  
 Date\_ 20100819  
 Time 12.49  
 INSTRUM spect  
 PROBHD 5 mm BBI 1H-B  
 PULPROG zg30  
 TD 65536  
 SOLVENT CDCl3  
 NS 80  
 DS 2  
 SWH 4432.624 Hz  
 FIDRES 0.067636 Hz  
 AQ 7.3925109 sec  
 RG 362  
 DW 112.600 usec  
 DE 6.00 usec  
 TE 300.0 K  
 D1 1.00000000 sec

----- CHANNEL f1 -----  
 NUC1 1H  
 P1 6.85 usec  
 PL1 0.00 dB  
 SFO1 400.1318315 MHz

F2 - Processing parameters  
 SI 32768  
 SF 400.1300000 MHz  
 WDW no  
 SSB 0  
 LB 0.00 Hz  
 GB 0  
 PC 1.00

1D NMR plot parameters  
 CX 20.00 cm  
 F1P 11.000 ppm  
 F1 4401.43 Hz  
 F2P -1.000 ppm  
 F2 -400.13 Hz  
 PPMCM 0.60000 ppm/cm  
 HZCM 240.07800 Hz/cm



ppm

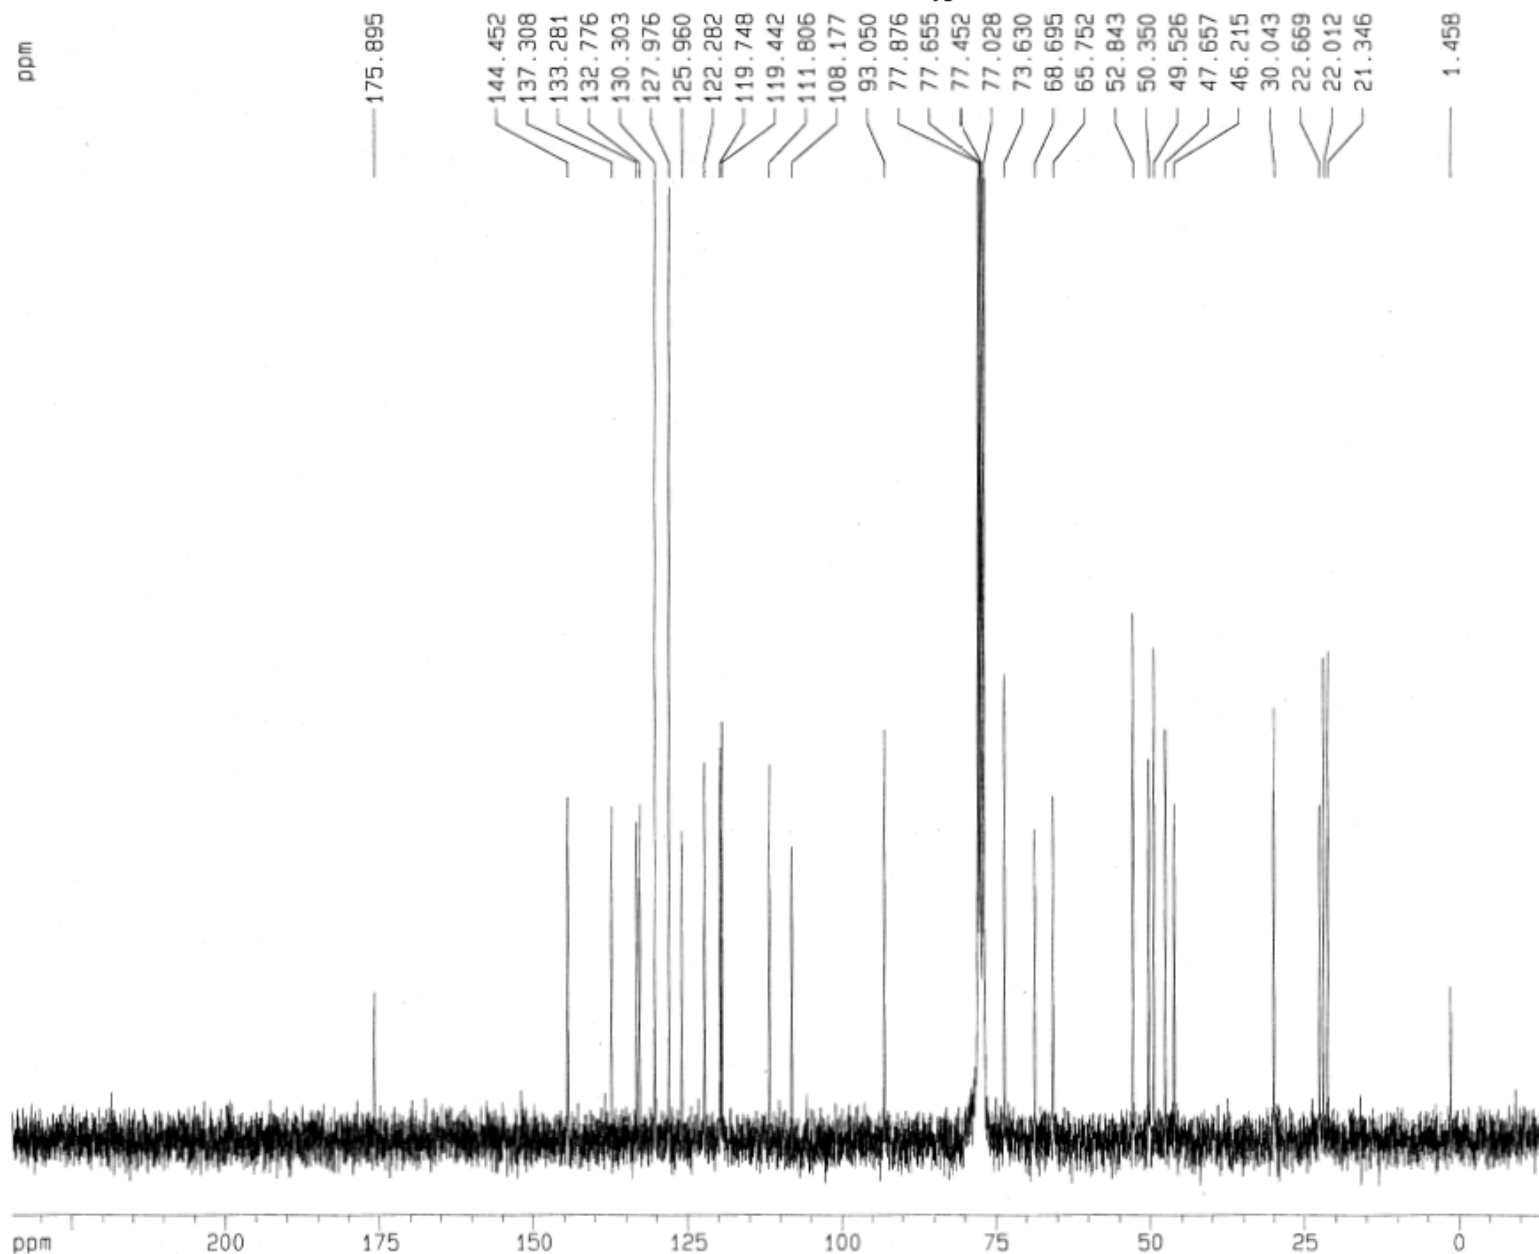

Current Data Parameters  
 NAME maxx  
 EXPNO 1  
 PROCNO 1

5764

F2 - Acquisition Parameters  
 Date\_ 20100822  
 Time 7.47  
 INSTRUM spect  
 PROBHD 5 mm GNP 1H/1  
 PULPROG zgpg30  
 TD 32768  
 SOLVENT CDC13  
 NS 11952  
 DS 4  
 SWH 18796.992 Hz  
 FIDRES 0.573639 Hz  
 AQ 0.8716788 sec  
 RG 4096  
 DW 26.600 usec  
 DE 6.00 usec  
 TE 300.0 K  
 D1 2.0000000 sec  
 D11 0.03000000 sec  
 D12 0.00002000 sec

----- CHANNEL f1 -----  
 NUC1 13C  
 P1 5.40 usec  
 PL1 -6.00 dB  
 SF01 75.4106357 MHz

----- CHANNEL f2 -----  
 CPDPRG2 waltz16  
 NUC2 1H  
 PCPD2 115.00 usec  
 PL2 0.00 dB  
 PL12 20.00 dB  
 PL13 20.00 dB  
 SF02 299.8711995 MHz

F2 - Processing parameters  
 S1 32768  
 SF 75.4023410 MHz  
 NDW EM  
 SSB 0  
 LB 1.00 Hz  
 GB 0  
 PC 1.40

1D NMR plot parameters  
 CX 20.00 cm  
 F1P 234.651 ppm  
 F1 17693.24 Hz  
 F2P -14.638 ppm  
 F2 -1103.75 Hz  
 PPMCM 12.46446 ppm/cm  
 HZCM 939.84955 Hz/cm

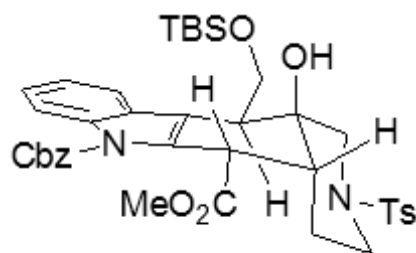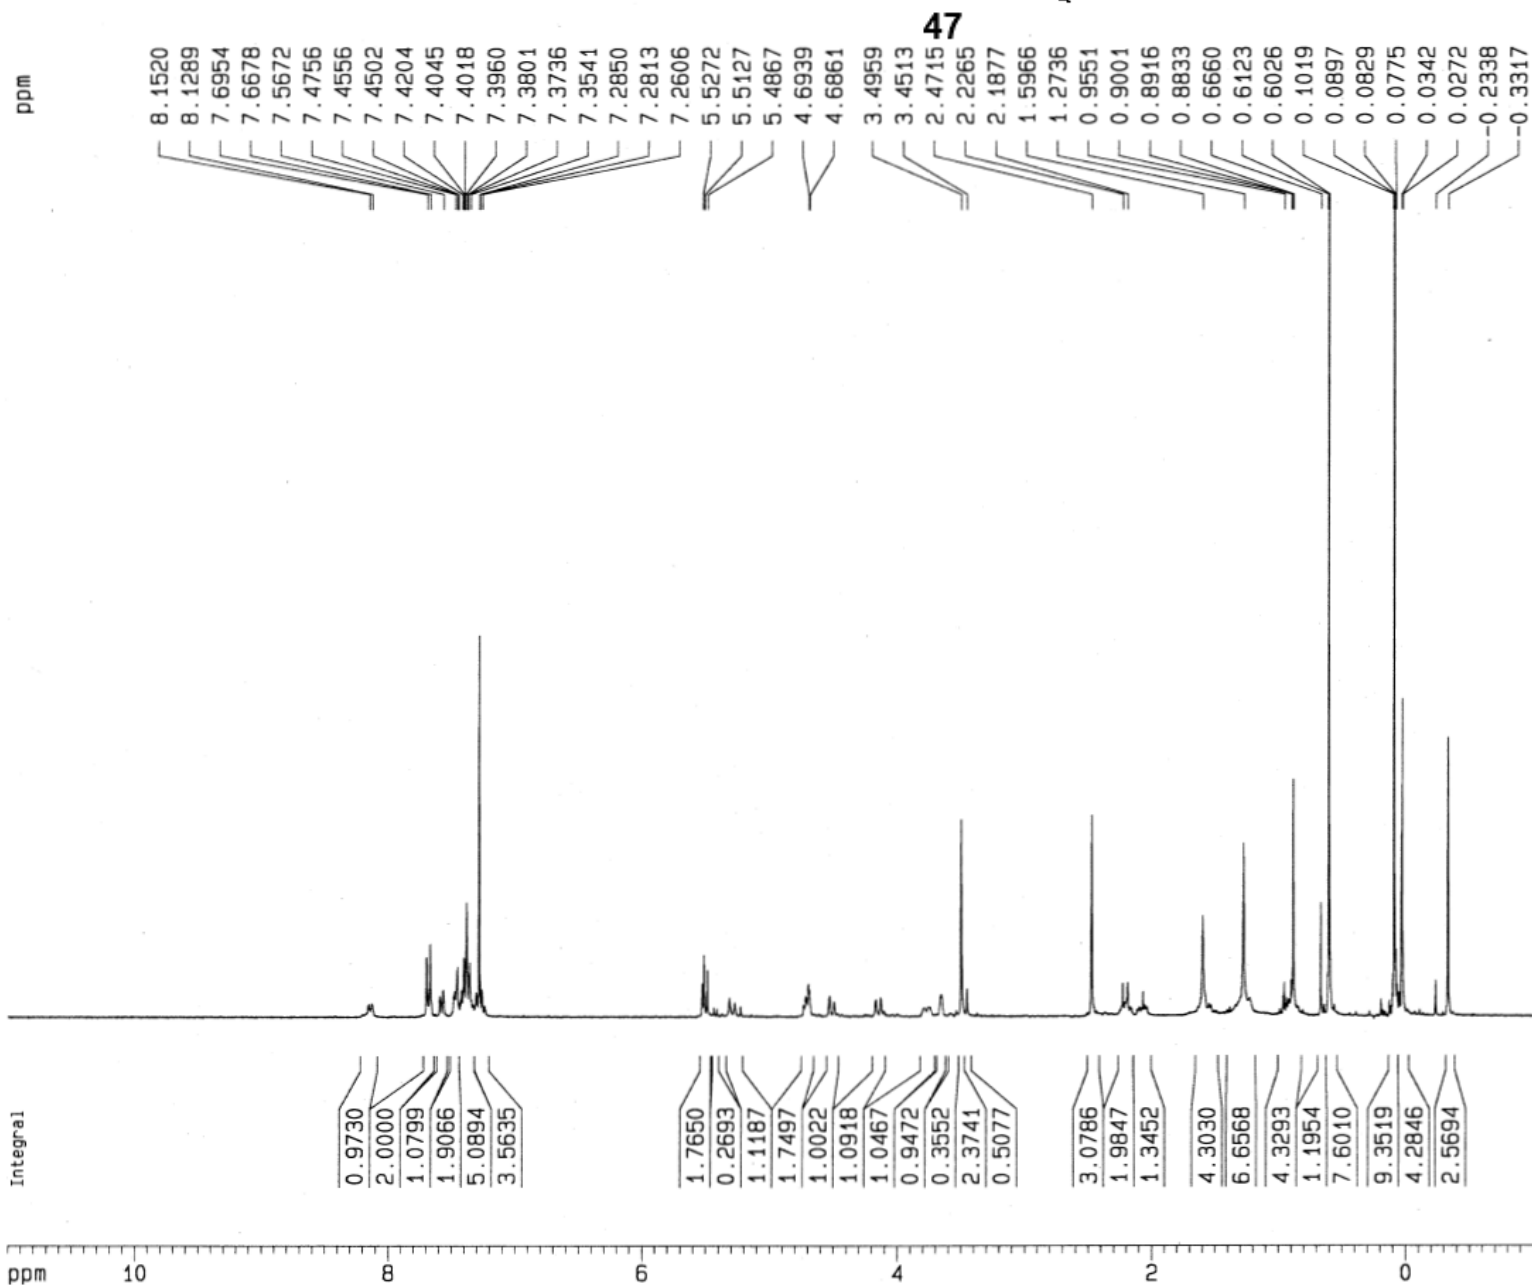

Current Data Parameters  
NAME 082310mm5274  
EXPNO 1  
PROCNO 1

F2 - Acquisition Parameters  
Date\_ 20100823  
Time 20.42  
INSTRUM spect  
PROBHD 5 mm Multinu  
PULPROG zg30  
TD 24690  
SOLVENT CDCl3  
NS 16  
DS 2  
SWH 6172.839 Hz  
FIDRES 0.250014 Hz  
AQ 1.9999400 sec  
RG 456.1  
DW 81.000 usec  
DE 6.00 usec  
TE 300.0 K  
D1 1.0000000 sec

===== CHANNEL f1 =====  
NUC1 1H  
P1 9.60 usec  
PL1 -6.00 dB  
SF01 300.1318534 MHz

F2 - Processing parameters  
SI 32768  
SF 300.1300000 MHz  
WDW no  
SSB 0  
LB 0.00 Hz  
GB 0  
PC 1.00

1D NMR plot parameters  
CX 20.00 cm  
F1P 11.000 ppm  
F1 3301.43 Hz  
F2P -1.000 ppm  
F2 -300.13 Hz  
PPMCM 0.60000 ppm/cm  
HZCM 180.07800 Hz/cm

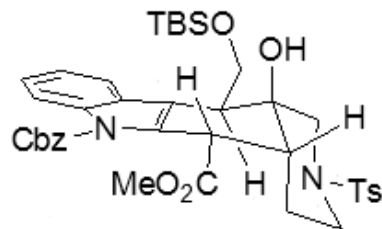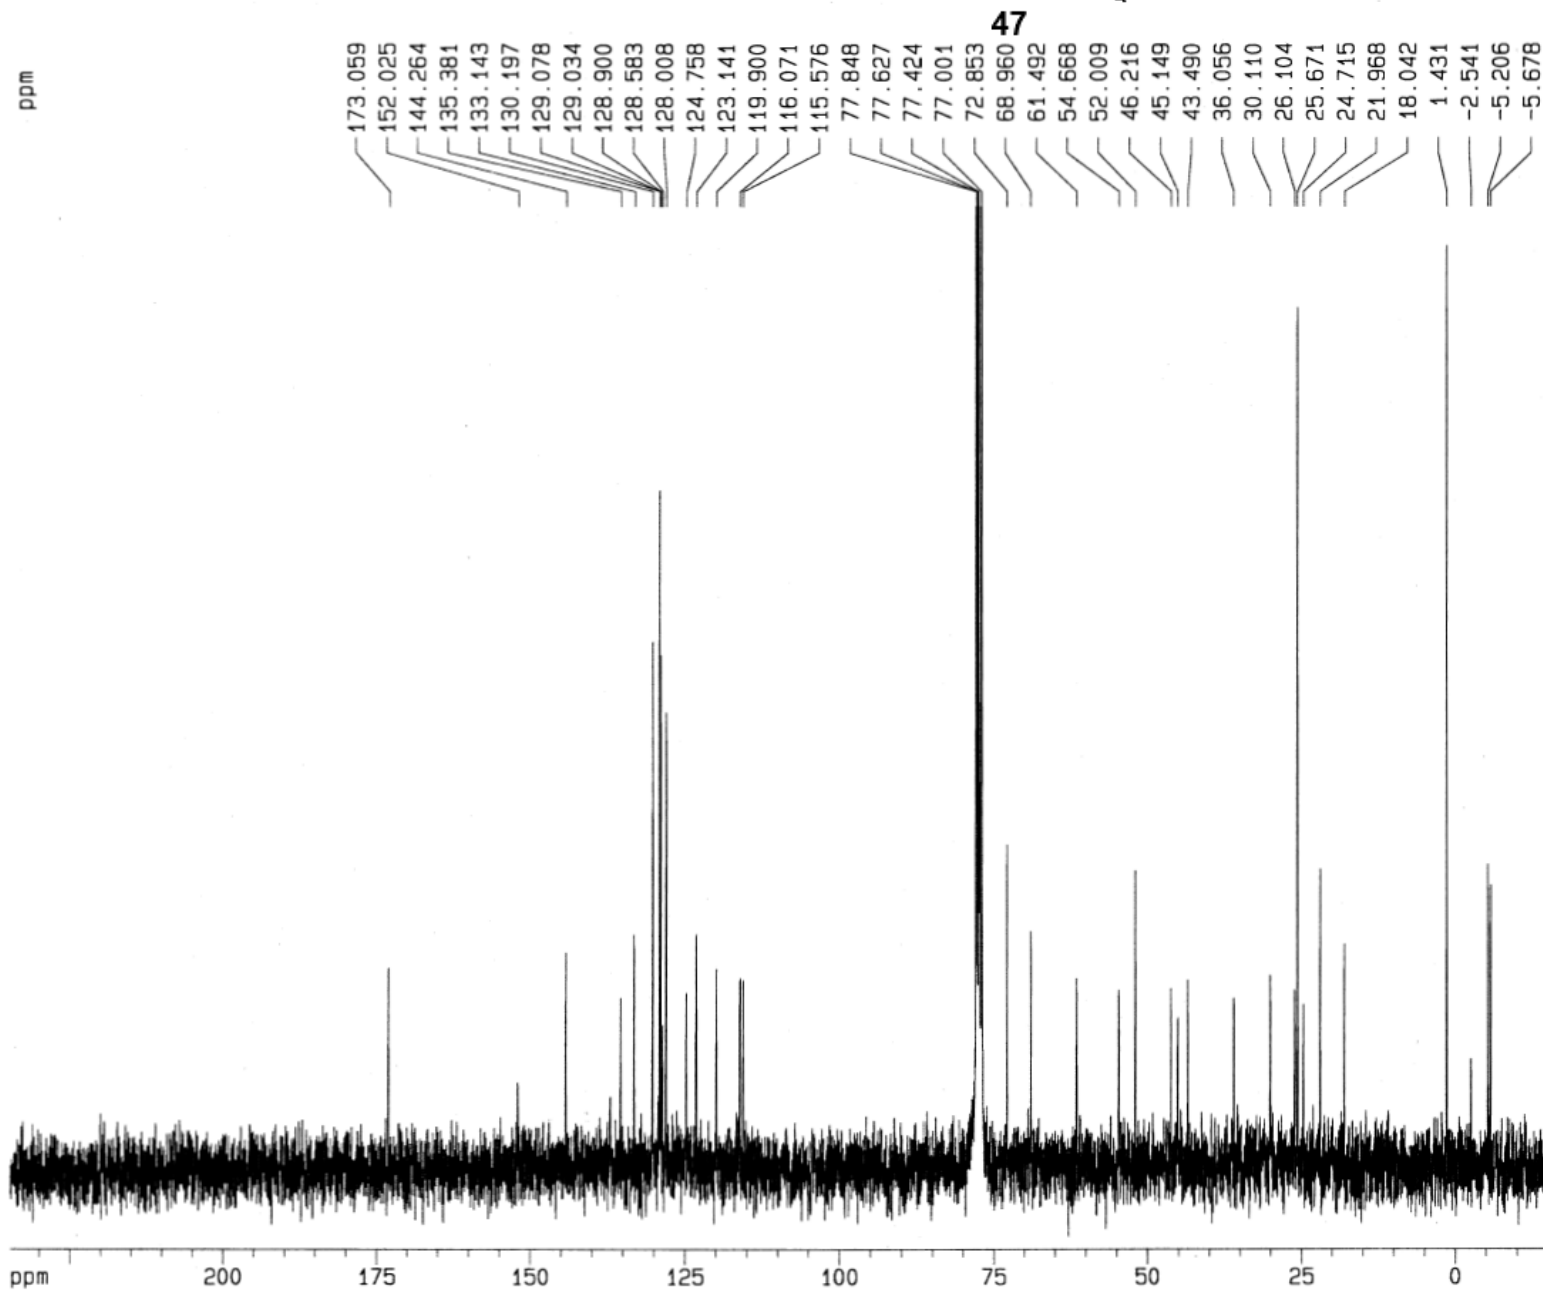

Current Data Parameters  
 NAME 082310mm5274  
 EXPNO 2  
 PROCNO 1

F2 - Acquisition Parameters  
 Date\_ 20100824  
 Time 8.14  
 INSTRUM spect  
 PROBHD 5 mm Multinu  
 PULPROG zgpg30  
 TD 32768  
 SOLVENT CDCl<sub>3</sub>  
 NS 14336  
 DS 4  
 SWH 18832.393 Hz  
 FIDRES 0.574719 Hz  
 AQ 0.8700404 sec  
 RG 13004  
 DW 26.550 usec  
 DE 6.00 usec  
 TE 300.0 K  
 D1 2.00000000 sec  
 d11 0.03000000 sec  
 d12 0.00002000 sec

===== CHANNEL f1 =====  
 NUC1 13C  
 P1 11.80 usec  
 PL1 0.00 dB  
 SF01 75.4760200 MHz

===== CHANNEL f2 =====  
 CPDPRG2 waltz16  
 NUC2 1H  
 PCPD2 110.00 usec  
 PL2 0.00 dB  
 PL12 17.50 dB  
 PL13 17.50 dB  
 SF02 300.1312005 MHz

F2 - Processing parameters  
 SI 32768  
 SF 75.4677190 MHz  
 WDW EM  
 SSB 0  
 LB 1.00 Hz  
 GB 0  
 PC 1.40

1D NMR plot parameters  
 CX 20.00 cm  
 F1P 234.765 ppm  
 F1 17717.16 Hz  
 F2P -14.778 ppm  
 F2 -1115.24 Hz  
 PPMCM 12.47712 ppm/cm  
 HZCM 941.61963 Hz/cm

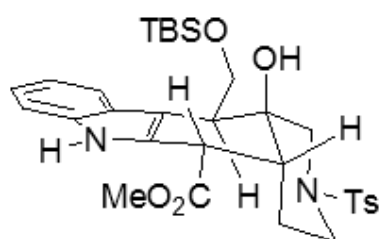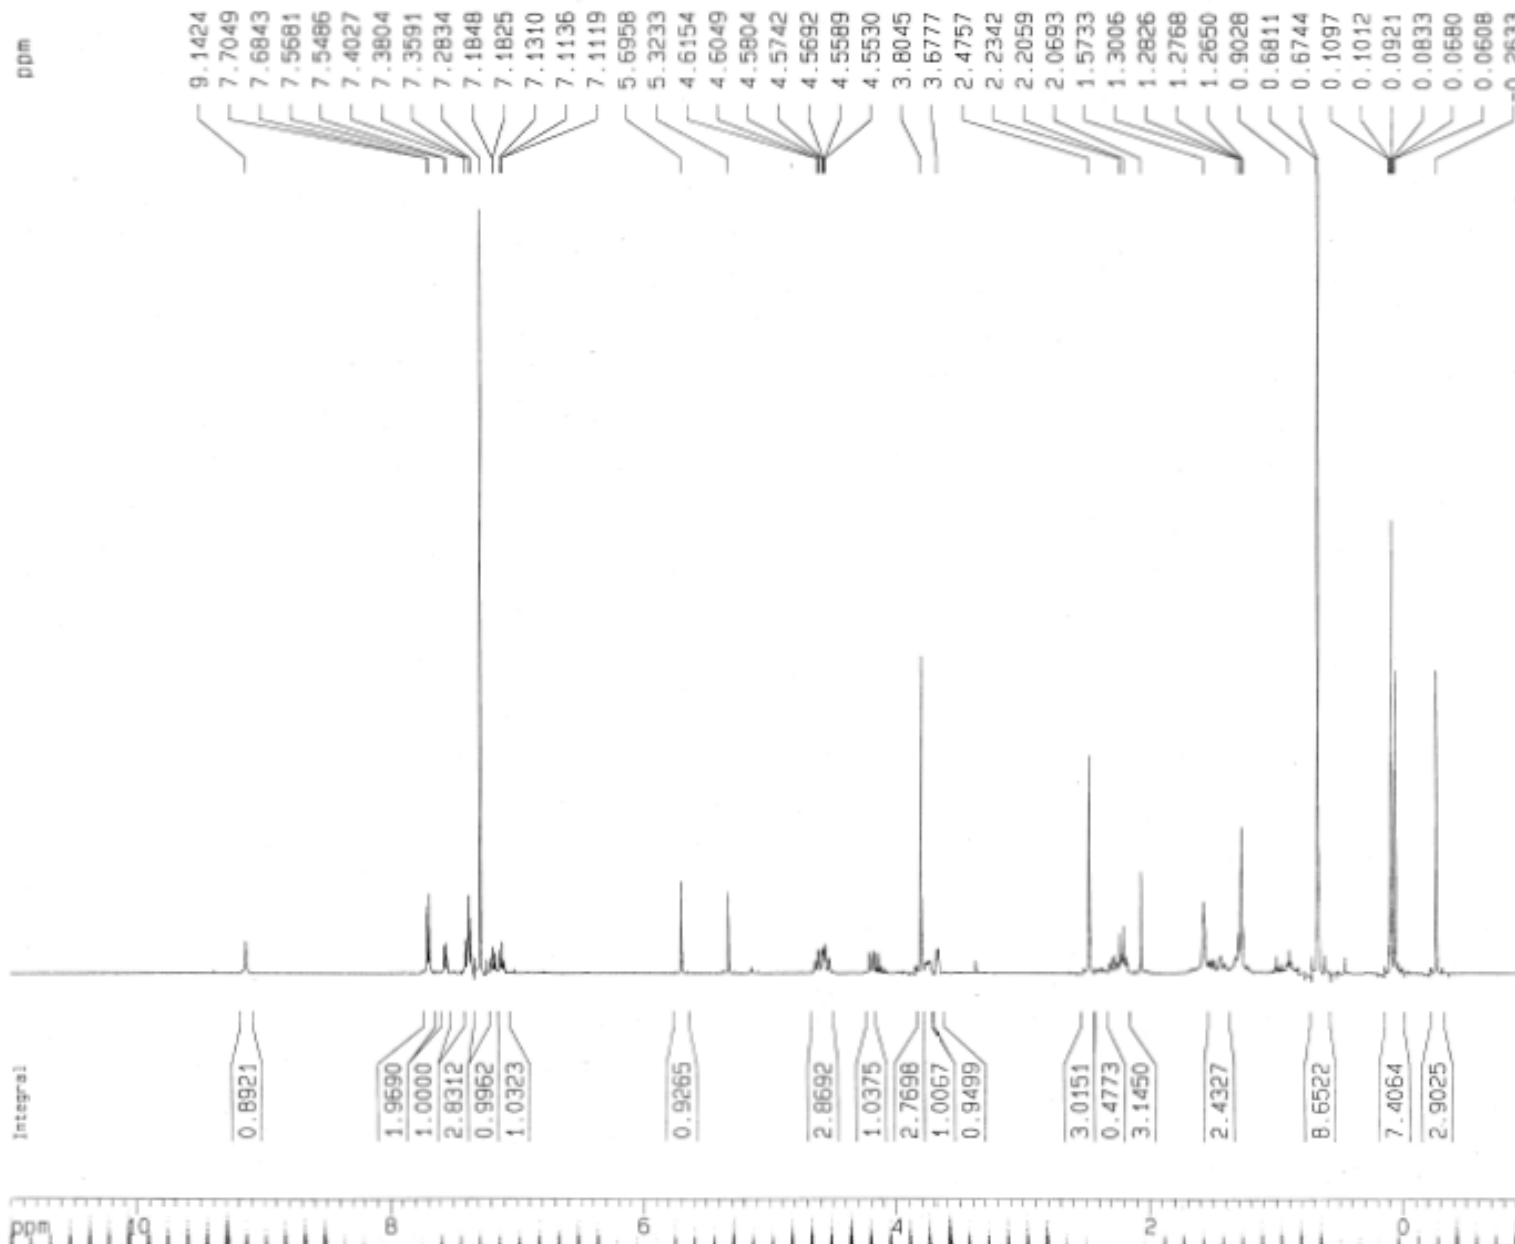

Current Data Parameters  
 NAME 111110ann6107  
 EXPNO 1  
 PROCNO 1

F2 - Acquisition Parameters  
 Date\_ 20101111  
 Time 12.08  
 INSTRUM spect  
 PROBHD 5 mm BBI 1H-B  
 PULPROG zg30  
 TO 33110  
 SOLVENT CDCl3  
 NS 57  
 DS 2  
 SWH 8278.146 Hz  
 FIDRES 0.250019 Hz  
 AQ 1.9998940 sec  
 RG 512  
 DM 60.400 usec  
 DE 6.00 usec  
 TE 300.0 K  
 D1 1.00000000 sec

----- CHANNEL f1 -----  
 NUC1 1H  
 P1 6.45 usec  
 PL1 0.00 dB  
 SFO1 400.1324710 MHz

F2 - Processing parameters  
 SI 32768  
 SF 400.1300000 MHz  
 WDW EM  
 SSB 0  
 LB 0.30 Hz  
 GB 0  
 PC 1.00

1D NMR plot parameters  
 CX 20.00 cm  
 F1P 11.000 ppm  
 F1 4401.43 Hz  
 F2P -1.000 ppm  
 F2 -400.13 Hz  
 PPMCH 0.60000 ppm/cm  
 HZCM 240.07800 Hz/cm

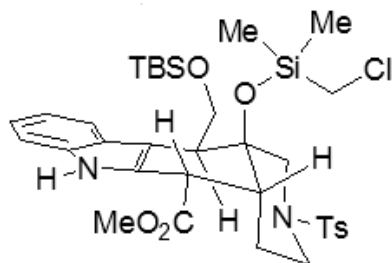

49

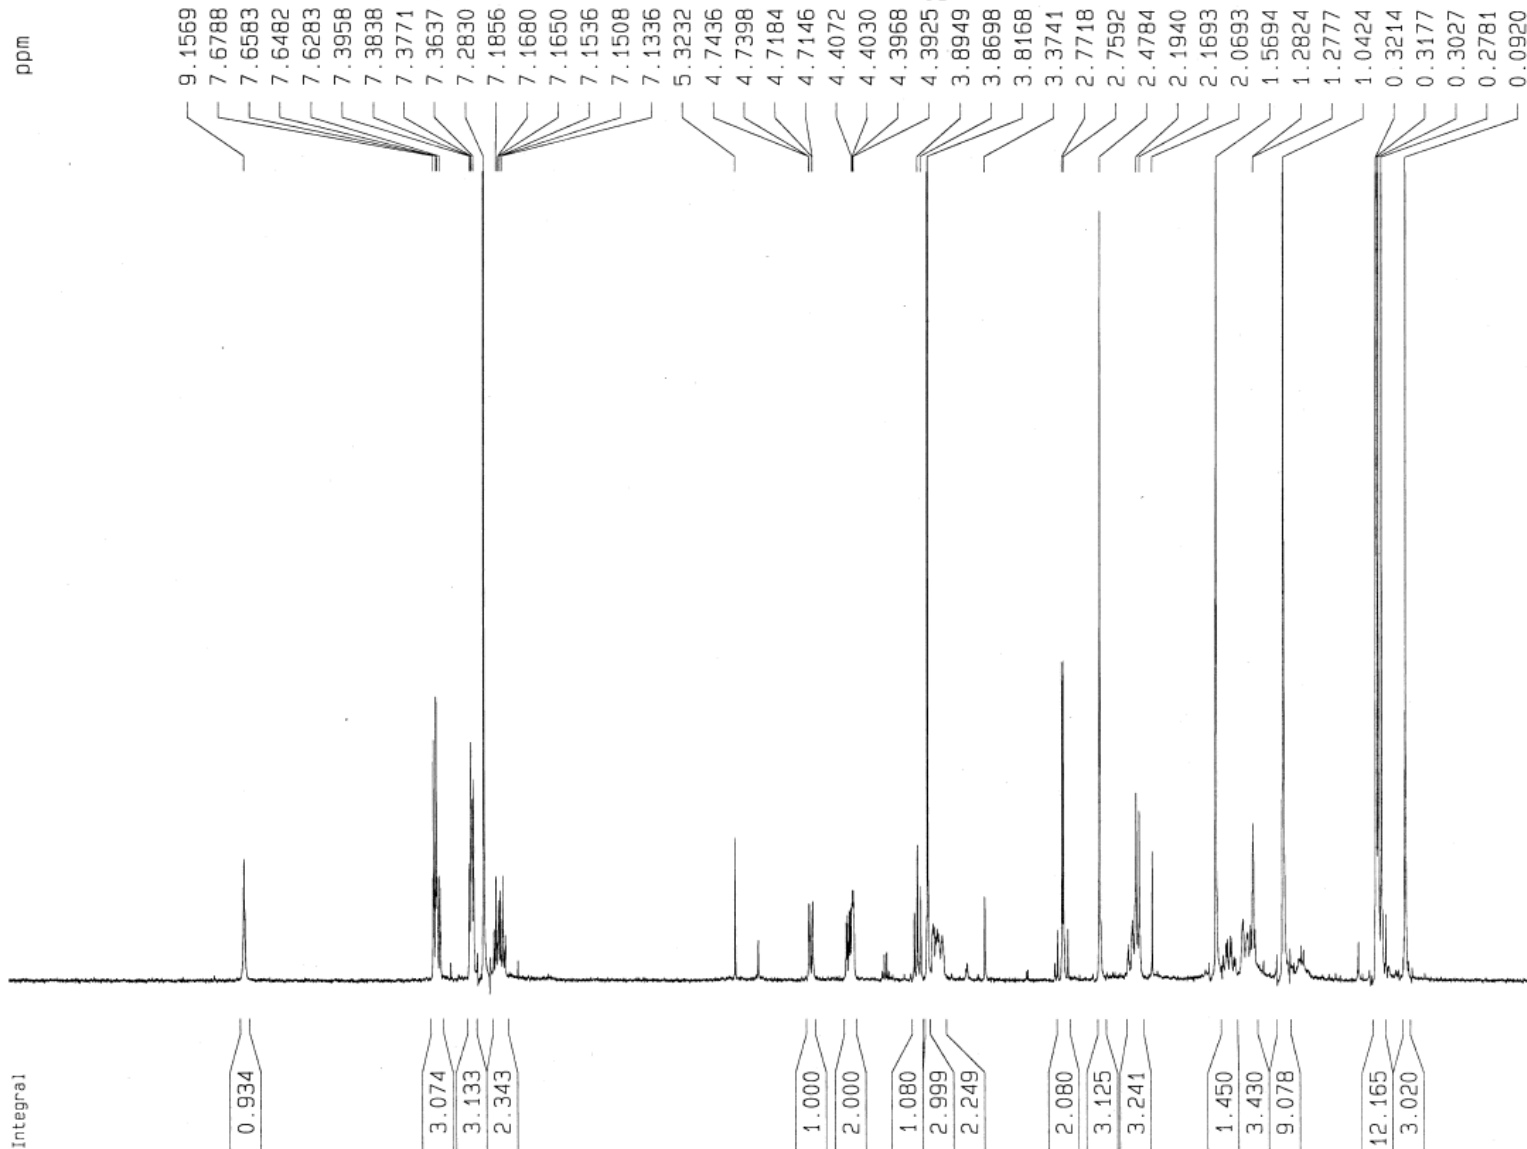

## Current Data Parameters

NAME 111110  
EXPNO 1  
PROCNO 1

## F2 - Acquisition Parameters

Date\_ 20101111  
Time 19.26  
INSTRUM spect  
PROBHD 5 mm BBI 1H-B  
PULPROG zg30  
TD 33110  
SOLVENT CDC13  
NS 83  
DS 2  
SWH 8278.146 Hz  
FIDRES 0.250019 Hz  
AQ 1.9998940 sec  
RG 2896.3  
DW 60.400 usec  
DE 6.00 usec  
TE 300.0 K  
D1 1.00000000 sec

## ===== CHANNEL f1 =====

NUC1 1H  
P1 6.45 usec  
PL1 0.00 dB  
SF01 400.1324710 MHz

## F2 - Processing parameters

SI 32768  
SF 400.1300000 MHz  
WDW EM  
SSB 0  
LB 0.30 Hz  
GB 0  
PC 1.00

## 1D NMR plot parameters

CX 20.00 cm  
F1P 11.000 ppm  
F1 4401.43 Hz  
F2P -1.000 ppm  
F2 -400.13 Hz  
PPMCM 0.60000 ppm/cm  
HZCM 240.07800 Hz/cm

ppm

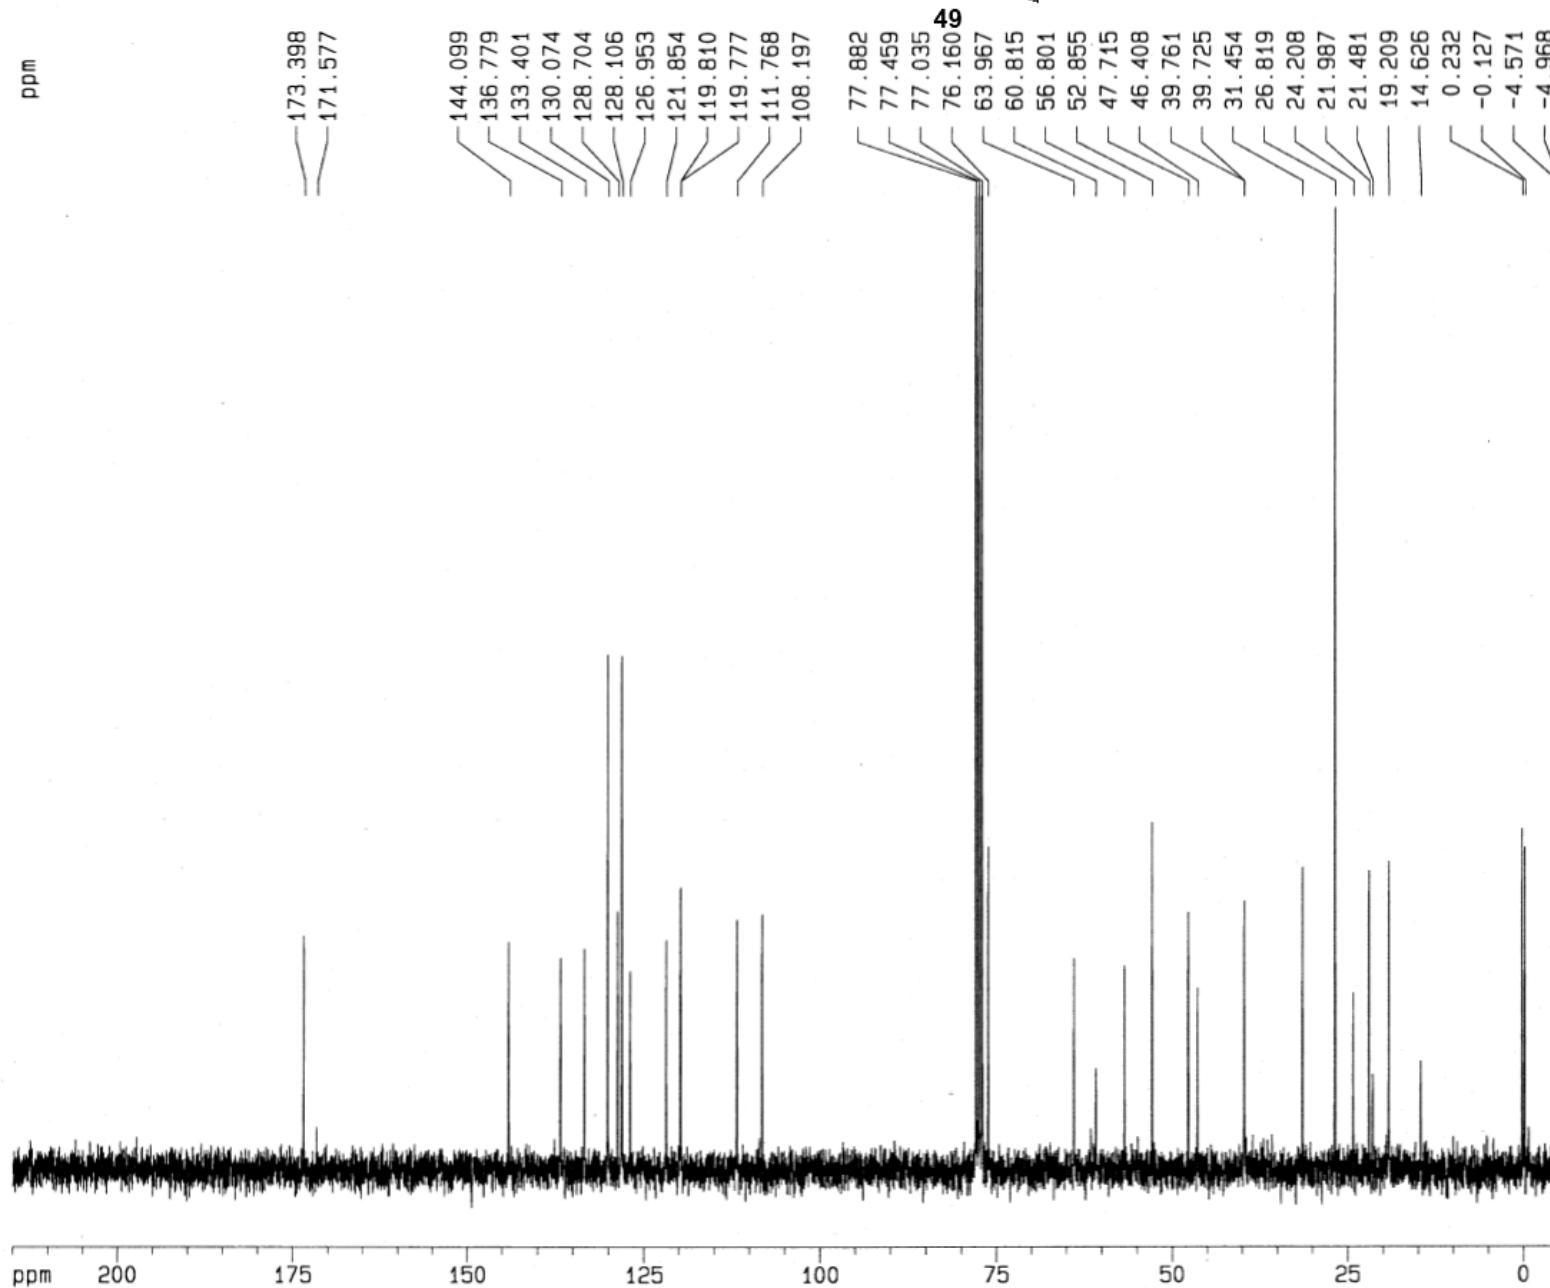

Current Data Parameters  
 NAME 121210mm6155  
 EXPNO 2  
 PROCNO 1

## F2 - Acquisition Parameters

Date\_ 20101212  
 Time 15.17  
 INSTRUM spect  
 PROBHD 5 mm Multinu  
 PULPROG zgpg30  
 TD 32768  
 SOLVENT CDC13  
 NS 595  
 DS 4  
 SWH 18832.393 Hz  
 FIDRES 0.574719 Hz  
 AQ 0.8700404 sec  
 RG 13004  
 DW 26.550 usec  
 DE 6.00 usec  
 TE 300.0 K  
 D1 2.00000000 sec  
 d11 0.03000000 sec  
 d12 0.00002000 sec

----- CHANNEL f1 -----  
 NUC1 13C  
 P1 11.80 usec  
 PL1 0.00 dB  
 SFO1 75.4760200 MHz

----- CHANNEL f2 -----  
 CPDPRG2 waltz16  
 NUC2 1H  
 PCPD2 110.00 usec  
 PL2 0.00 dB  
 PL12 17.50 dB  
 PL13 17.50 dB  
 SFO2 300.1312005 MHz

## F2 - Processing parameters

SI 32768  
 SF 75.4677190 MHz  
 WDW EM  
 SSB 0  
 LB 1.00 Hz  
 GB 0  
 PC 1.40

## 1D NMR plot parameters

CX 20.00 cm  
 F1P 215.000 ppm  
 F1 16225.56 Hz  
 F2P -5.000 ppm  
 F2 -377.34 Hz  
 PPMCM 11.00000 ppm/cm  
 HZCM 830.14490 Hz/cm

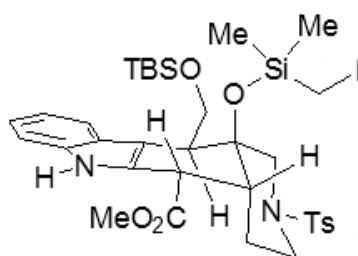

50

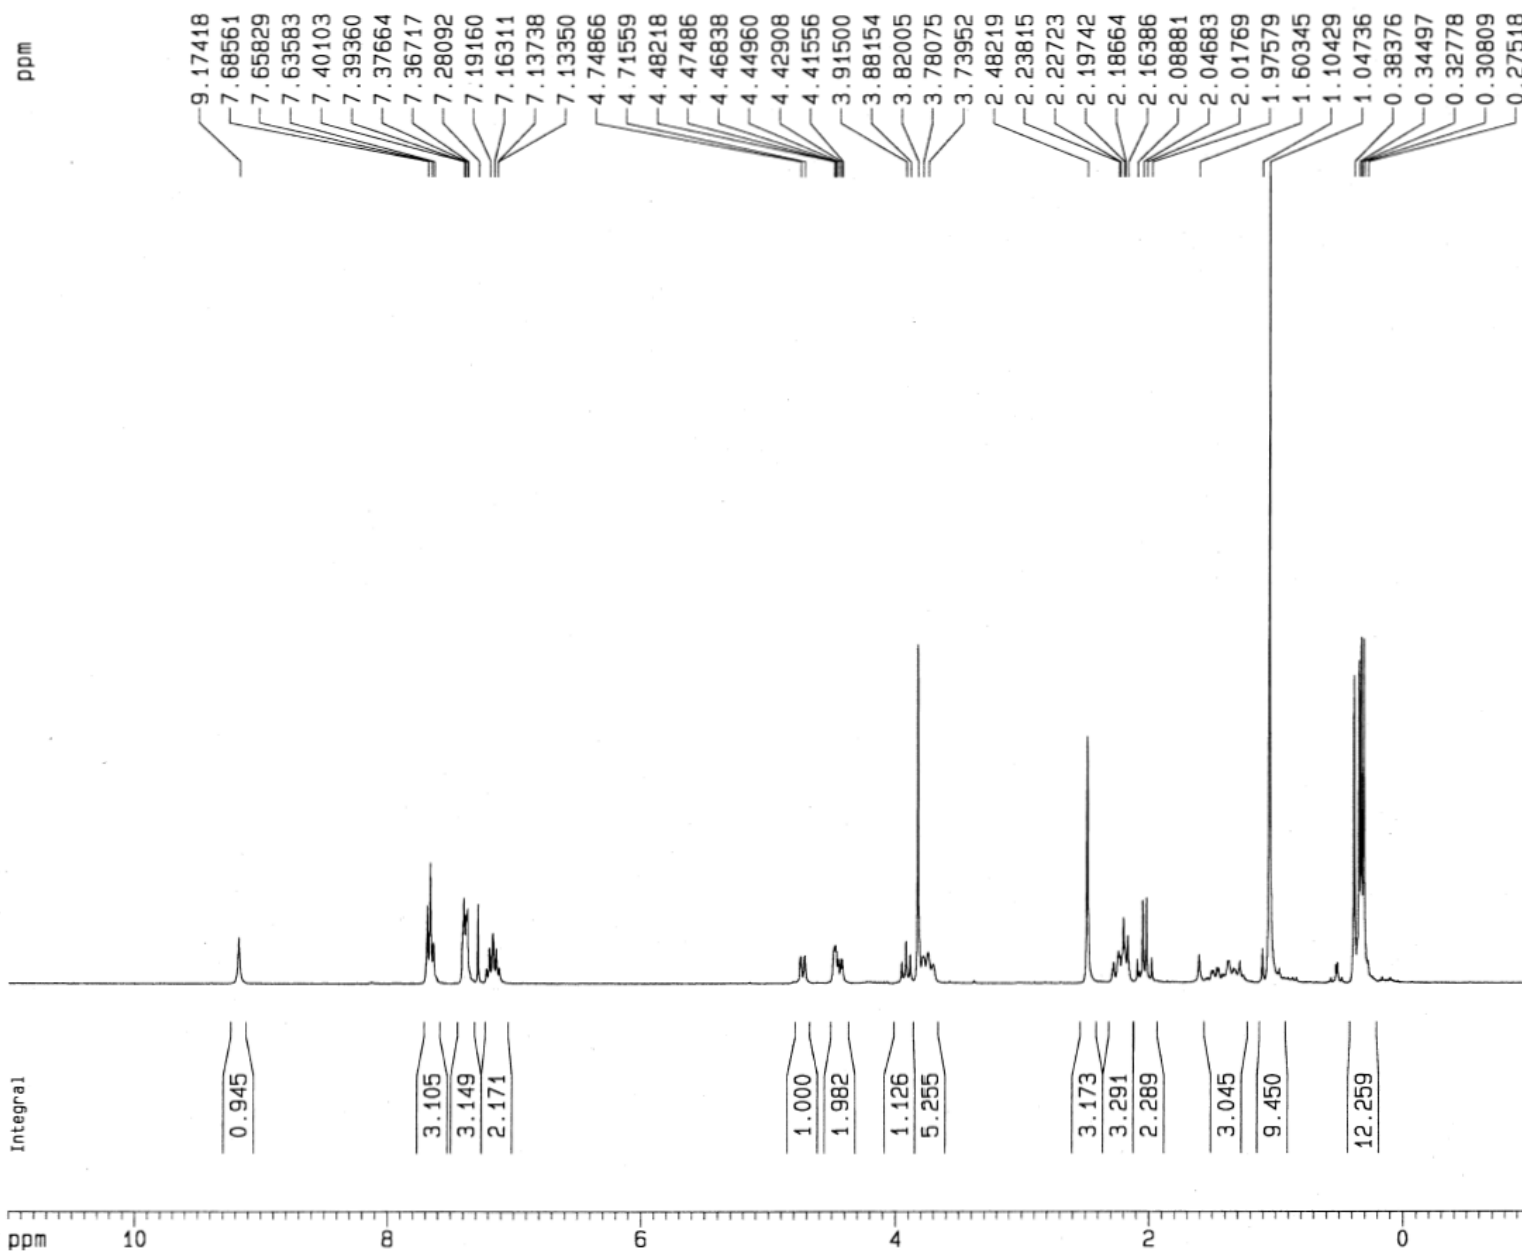

Current Data Parameters  
NAME 113010  
EXPNO 1  
PROCNO 1

F2 - Acquisition Parameters  
Date\_ 20101130  
Time 12.26  
INSTRUM spect  
PROBHD 5 mm Multinu  
PULPROG zg30  
TD 24690  
SOLVENT CDC13  
NS 16  
DS 2  
SWH 6172.839 Hz  
FIDRES 0.250014 Hz  
AQ 1.9999400 sec  
RG 322.5  
DW 81.000 usec  
DE 6.00 usec  
TE 300.0 K  
D1 1.00000000 sec

===== CHANNEL f1 =====  
NUC1 1H  
P1 9.60 usec  
PL1 -6.00 dB  
SF01 300.1318534 MHz

F2 - Processing parameters  
SI 32768  
SF 300.1300000 MHz  
WDW no  
SSB 0  
LB 0.00 Hz  
GB 0  
PC 1.00

1D NMR plot parameters  
CX 20.00 cm

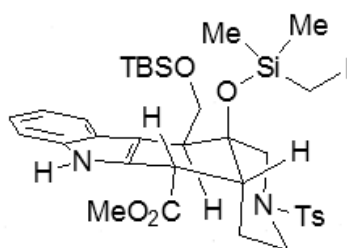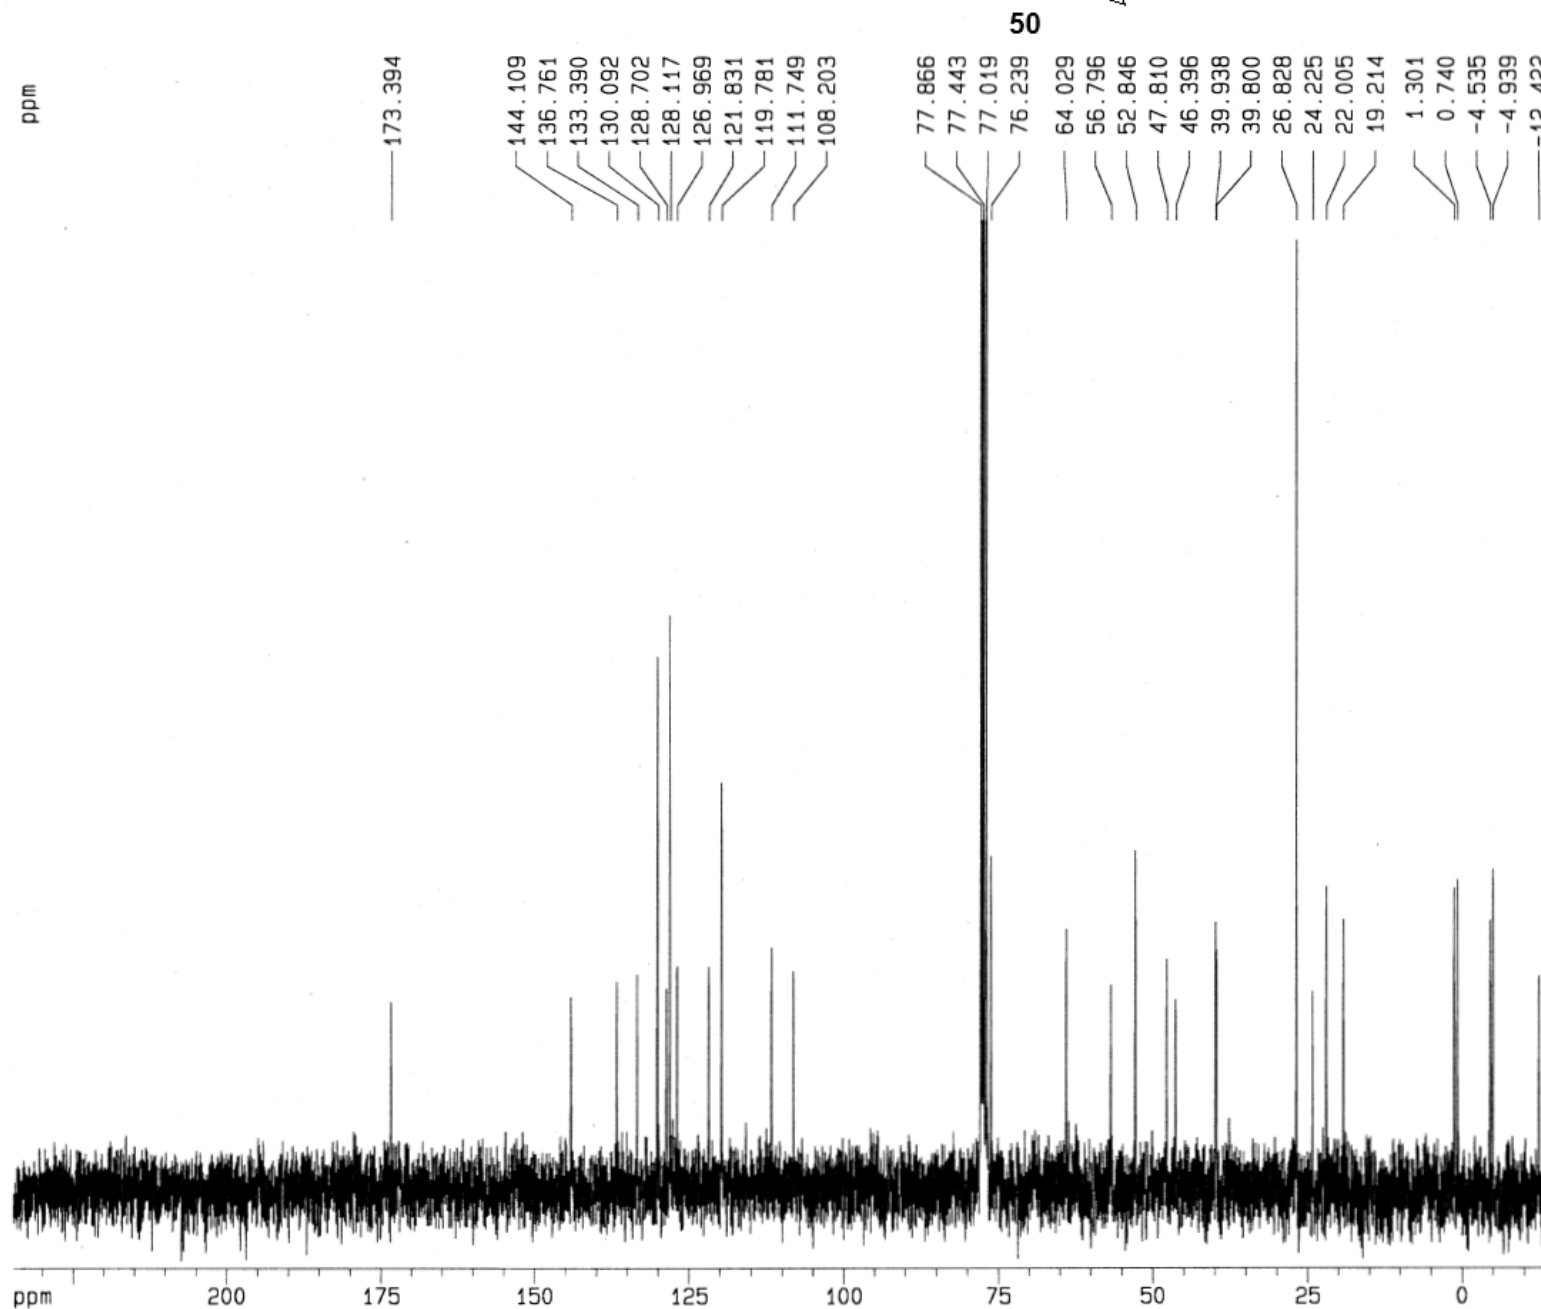

Current Data Parameters  
NAME 113010  
EXPNO 2  
PROCNO 1

F2 - Acquisition Parameters  
Date\_ 20101130  
Time 13.16  
INSTRUM spect  
PROBHD 5 mm Multinu  
PULPROG zgpg30  
TD 32768  
SOLVENT CDC13  
NS 1024  
DS 4  
SWH 18832.393 Hz  
FIDRES 0.574719 Hz  
AQ 0.8700404 sec  
RG 16384  
DM 26.550 usec  
DE 6.00 usec  
TE 300.0 K  
D1 2.00000000 sec  
d11 0.03000000 sec  
d12 0.00002000 sec

===== CHANNEL f1 =====  
NUC1 13C  
P1 11.80 usec  
PL1 0.00 dB  
SF01 75.4760200 MHz

===== CHANNEL f2 =====  
CPDPRG2 waltz16  
NUC2 1H  
PCPD2 110.00 usec  
PL2 0.00 dB  
PL12 17.50 dB  
PL13 17.50 dB  
SF02 300.1312005 MHz

F2 - Processing parameters  
SI 32768  
SF 75.4677190 MHz  
WDW EM  
SSB 0  
LB 1.00 Hz  
GB 0  
PC 1.40

1D NMR plot parameters  
CX 20.00 cm  
F1P 234.765 ppm  
F1 17717.15 Hz  
F2P -14.778 ppm  
F2 -1115.24 Hz  
PPMCM 12.47712 ppm/cm  
HZCM 941.61951 Hz/cm



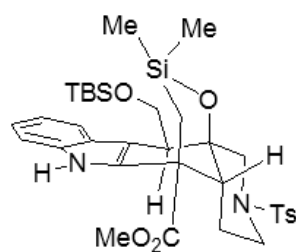

51

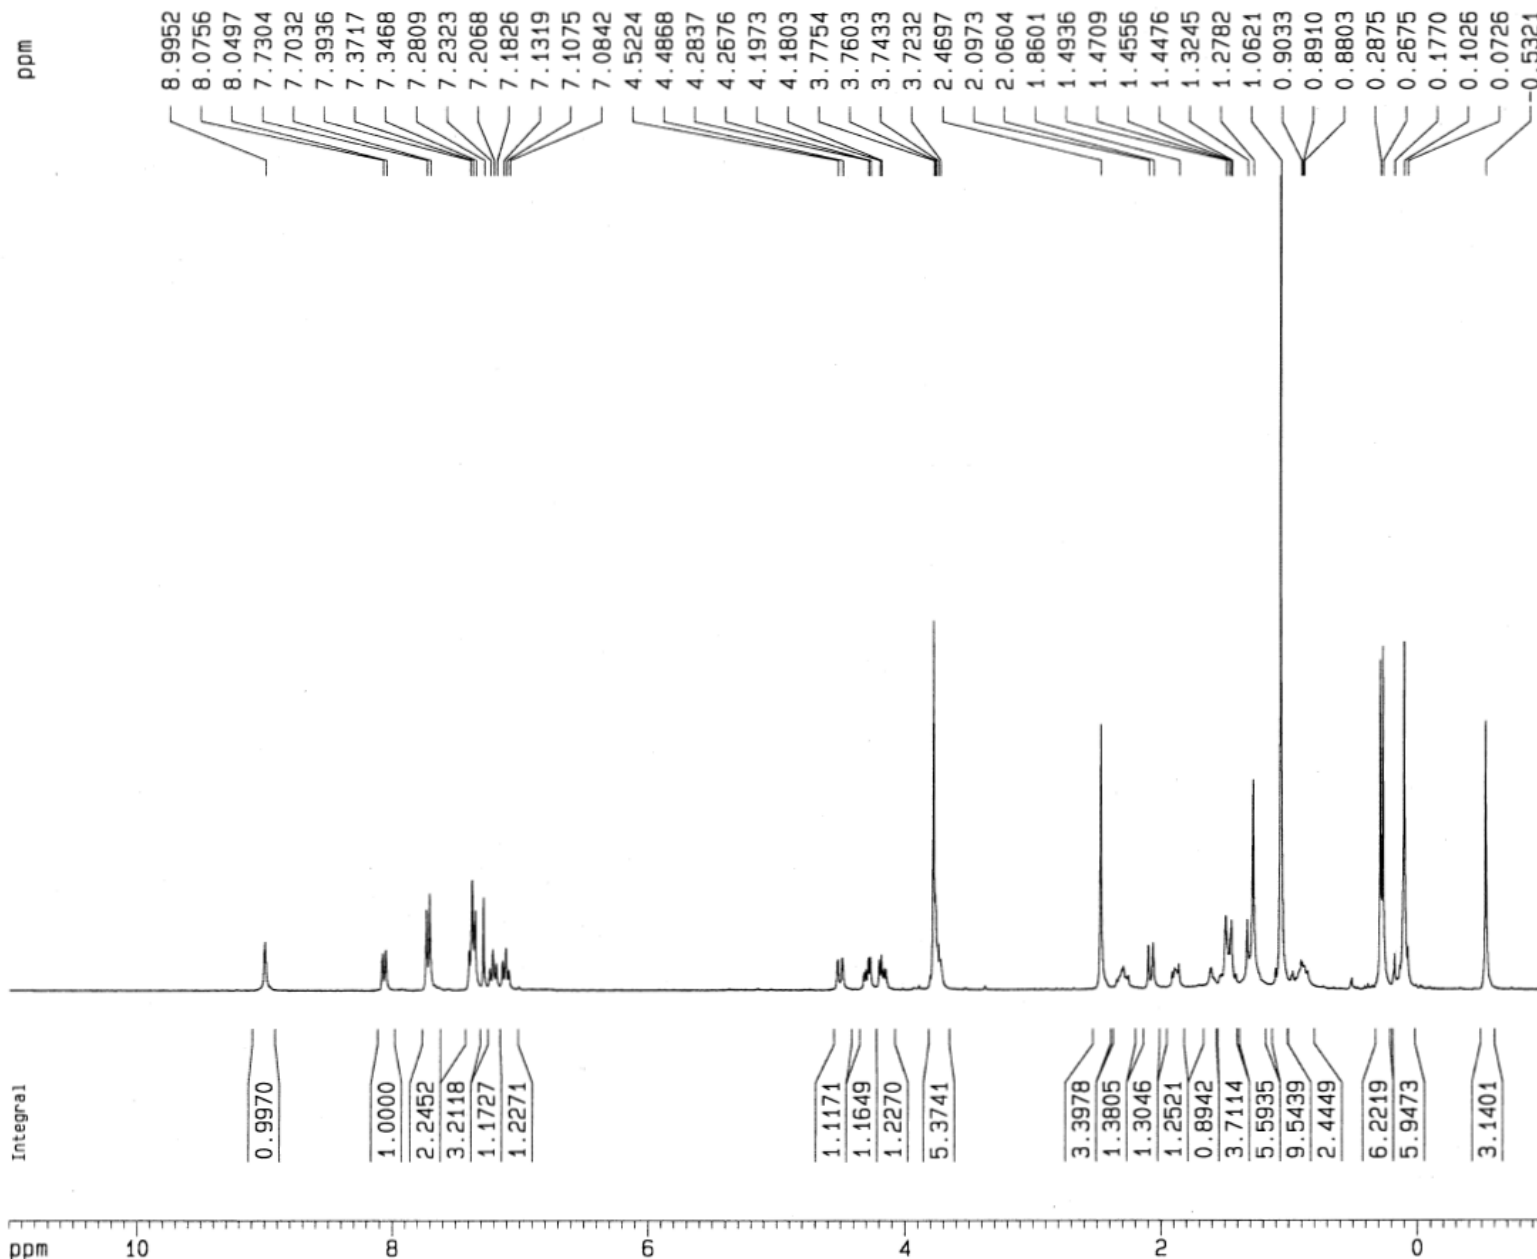

Current Data Parameters  
 NAME 120110  
 EXPNO 1  
 PROCNO 1

F2 - Acquisition Parameters  
 Date\_ 20101201  
 Time 9.43  
 INSTRUM spect  
 PROBHD 5 mm Multinu  
 PULPROG zg30  
 TD 24690  
 SOLVENT CDCl3  
 NS 16  
 DS 2  
 SWH 6172.839 Hz  
 FIDRES 0.250014 Hz  
 AQ 1.9999400 sec  
 RG 362  
 DW 81.000 usec  
 DE 6.00 usec  
 TE 300.0 K  
 D1 1.00000000 sec

===== CHANNEL f1 =====  
 NUC1 1H  
 P1 9.60 usec  
 PL1 -6.00 dB  
 SFO1 300.1318534 MHz

F2 - Processing parameters  
 SI 32768  
 SF 300.1300000 MHz  
 WDW no  
 SSB 0  
 LB 0.00 Hz  
 GB 0  
 PC 1.00

1D NMR plot parameters  
 CX 20.00 cm  
 F1P 11.000 ppm  
 F1 3301.43 Hz  
 F2P -1.000 ppm  
 F2 -300.13 Hz  
 PPMCM 0.60000 ppm/cm  
 HZCM 180.07800 Hz/cm

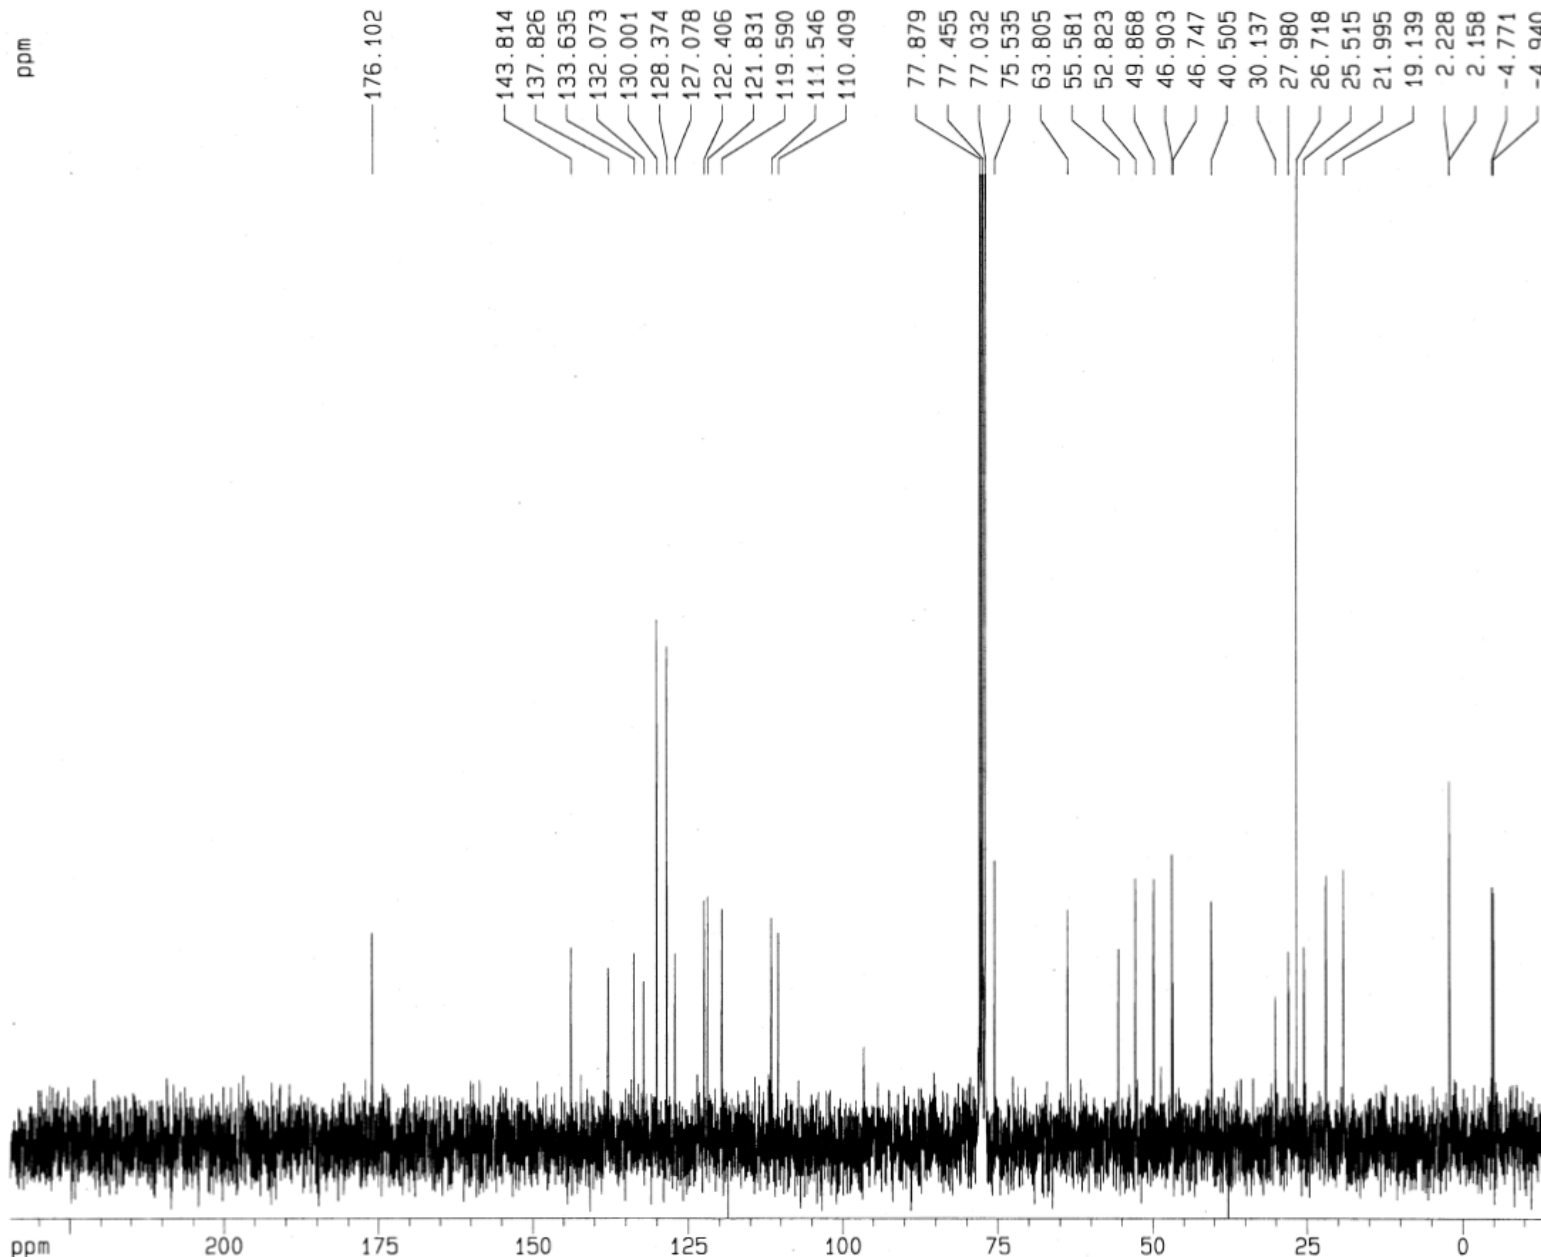

Current Data Parameters  
NAME 120110  
EXPNO 2  
PROCNO 1

F2 - Acquisition Parameters  
Date\_ 20101201  
Time 10.10  
INSTRUM spect  
PROBHD 5 mm GNP 1H/1  
PULPROG zgpg30  
TD 32768  
SOLVENT CDCl3  
NS 1024  
DS 4  
SWH 18796.992 Hz  
FIDRES 0.573639 Hz  
AQ 0.8716788 sec  
RG 16384  
DW 26.600 usec  
DE 6.00 usec  
TE 300.0 K  
D1 2.00000000 sec  
D11 0.03000000 sec  
D12 0.00002000 sec

===== CHANNEL f1 =====  
NUC1 13C  
P1 5.40 usec  
PL1 -6.00 dB  
SF01 75.4106357 MHz

===== CHANNEL f2 =====  
CPDPRG2 waltz16  
NUC2 1H  
PCPD2 115.00 usec  
PL2 0.00 dB  
PL12 20.00 dB  
PL13 20.00 dB  
SF02 299.8711995 MHz

F2 - Processing parameters  
SI 32768  
SF 75.4023410 MHz  
WDW EM  
SSB 0  
LB 1.00 Hz  
GB 0  
PC 1.40

1D NMR plot parameters  
CX 20.00 cm  
F1P 234.651 ppm  
F1 17693.24 Hz  
F2P -14.638 ppm  
F2 -1103.75 Hz  
PPMCM 12.46446 ppm/cm  
HZCM 939.84955 Hz/cm

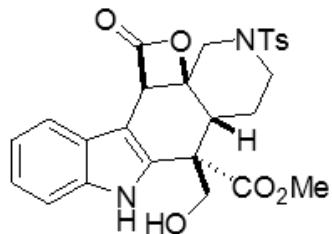

55

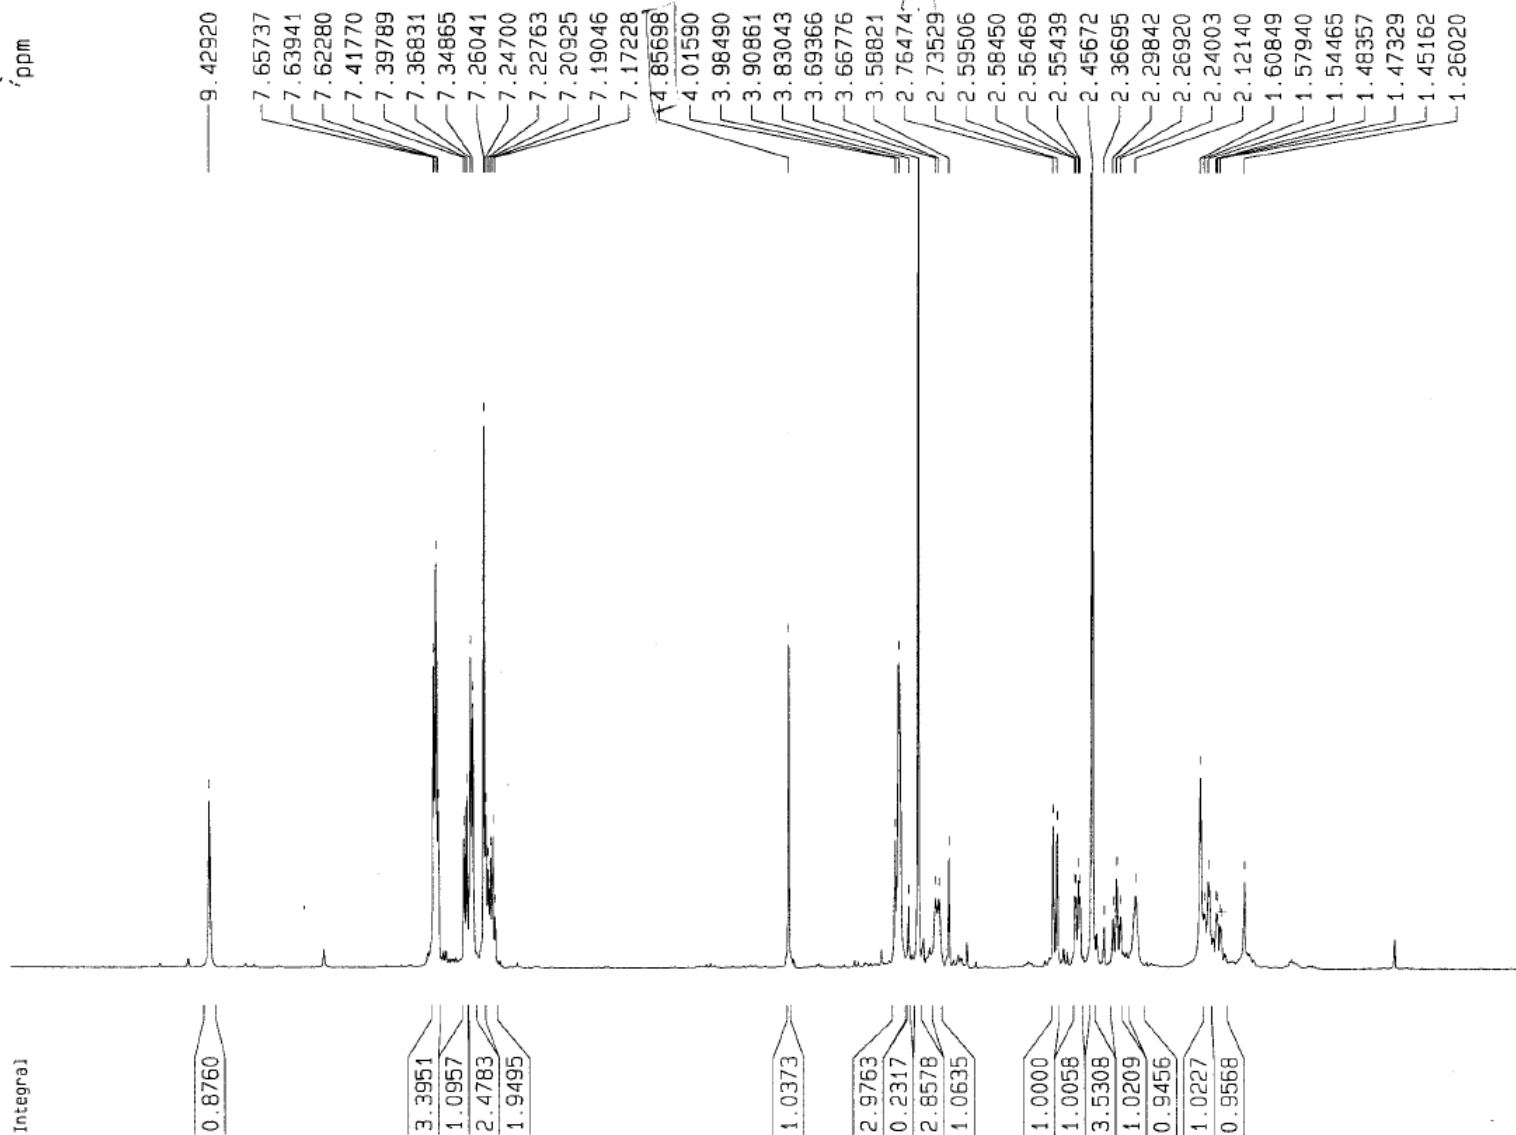

Current Data Parameters  
 NAME 080111FJII-052  
 EXPNO 2  
 PROCNO 1

F2 - Acquisition Parameters  
 Date\_ 20110801  
 Time 17.58  
 INSTRUM spect  
 PROBHD 5 mm BBI 1H-  
 PULPROG zg30  
 TD 65536  
 SOLVENT CDCl3  
 NS 16  
 DS 2  
 SWH 8278.146 Hz  
 FIDRES 0.126314 Hz  
 AQ 3.9584243 sec  
 RG 161.3  
 DW 60.400 usec  
 DE 6.00 usec  
 TE 300.0 K  
 D1 1.00000000 sec

===== CHANNEL f1 =====  
 NUC1 1H  
 P1 6.45 usec  
 PL1 0.00 dB  
 SF01 400.1324710 MHz

F2 - Processing parameters  
 SI 32768  
 SF 400.1300089 MHz  
 WDW EM  
 SSB 0  
 LB 0.30 Hz  
 GB 0  
 PC 1.00

1D NMR plot parameters  
 CX 20.00 cm  
 F1P 11.000 ppm  
 F1 4401.43 Hz  
 F2P -1.000 ppm  
 F2 -400.13 Hz  
 PPMCM 0.60000 ppm/cm  
 HZCM 240.07800 Hz/cm

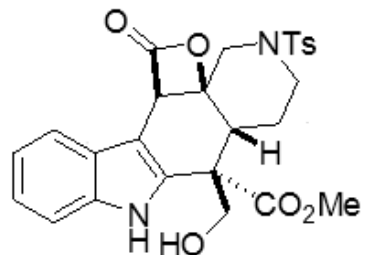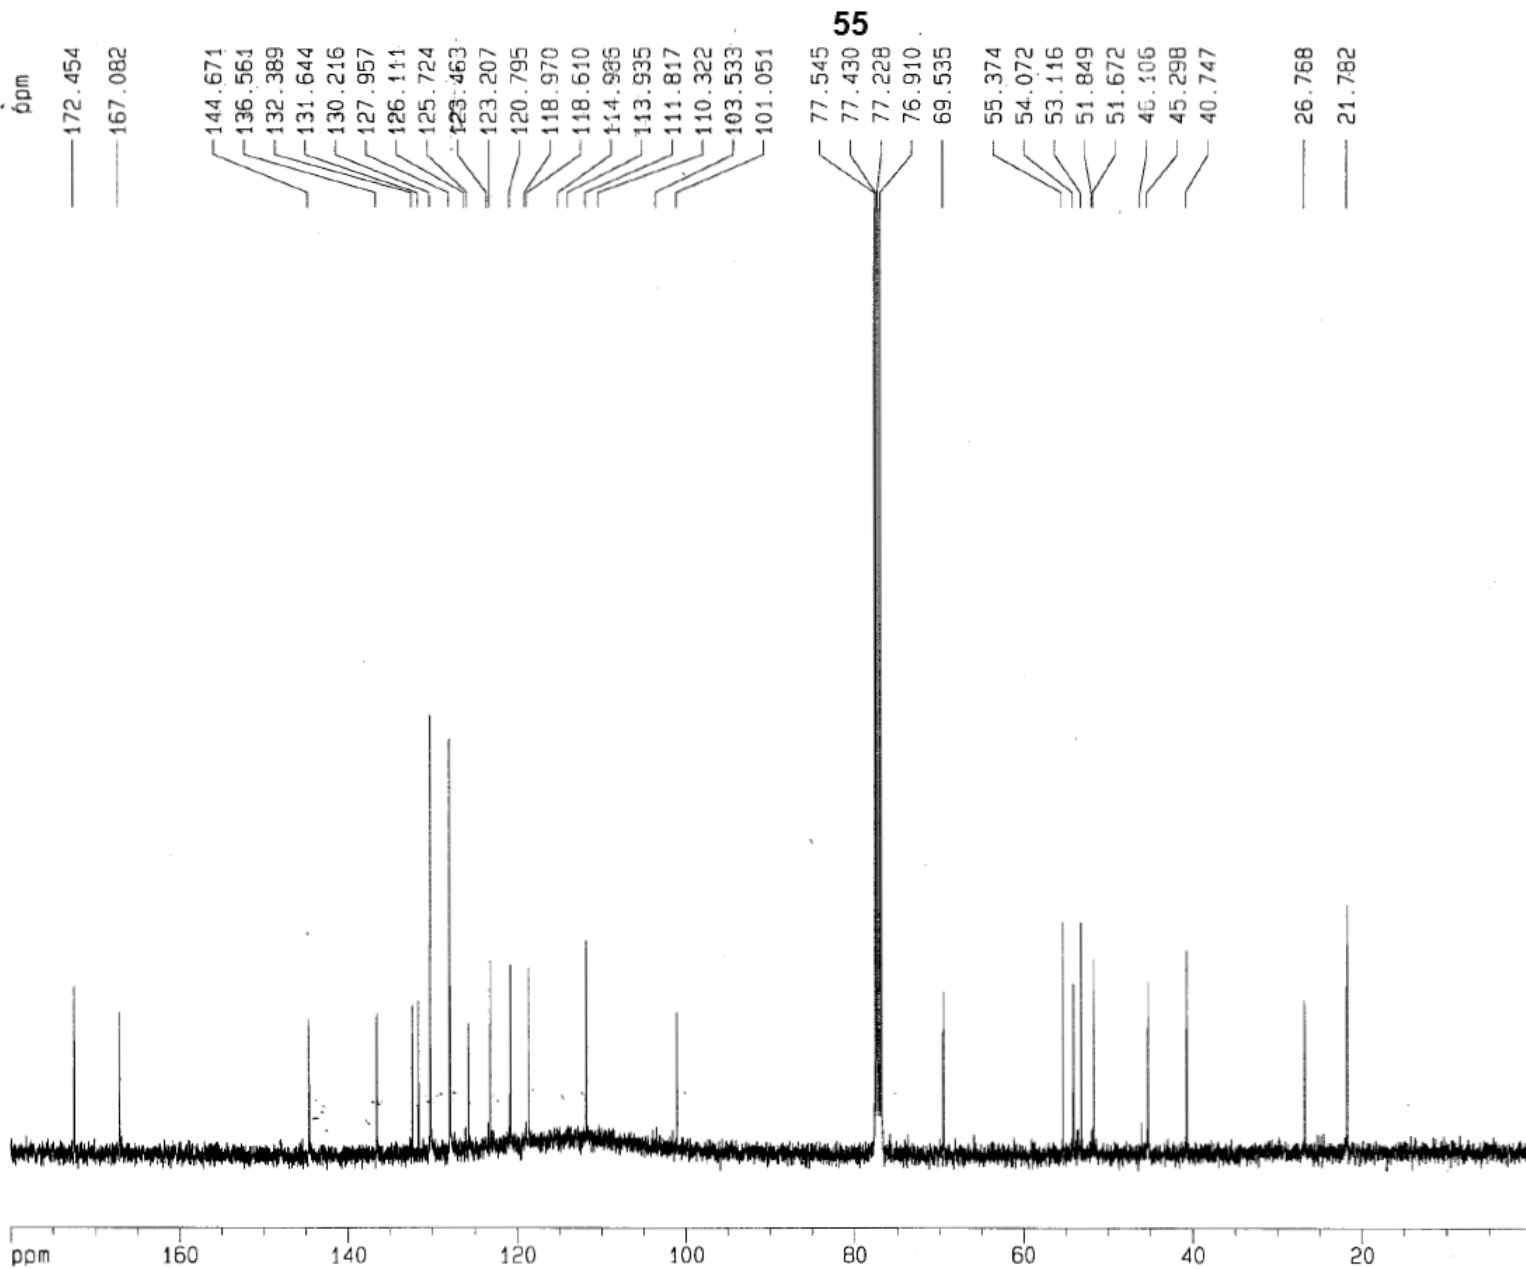

## Current Data Parameters

NAME 080111FJII-052  
 EXPNO 7  
 PROCNO 1

## F2 - Acquisition Parameters

Date\_ 20110802  
 Time 2.55  
 INSTRUM spect  
 PROBHD 5 mm BBI 1H-  
 PULPROG zgpg30  
 TD 65536  
 SOLVENT CDC13  
 NS 5120  
 DS 4  
 SWH 25125.629 Hz  
 FIDRES 0.383387 Hz  
 AQ 1.3042164 sec  
 RG 16384  
 DW 19.900 usec  
 DE 6.00 usec  
 TE 300.0 K  
 D1 2.0000000 sec  
 d11 0.0300000 sec  
 d12 0.0000200 sec

## ----- CHANNEL f1 -----

NUC1 13C  
 P1 16.35 usec  
 PL1 -6.00 dB  
 SF01 100.6237959 MHz

## ----- CHANNEL f2 -----

CPDPRG2 waltz16  
 NUC2 1H  
 PCPD2 114.00 usec  
 PL2 0.00 dB  
 PL12 24.00 dB  
 PL13 24.00 dB  
 SF02 400.1316005 MHz

## F2 - Processing parameters

SI 32768  
 SF 100.5127499 MHz  
 WDW EM  
 SSB 0  
 LB 1.00 Hz  
 GB 0  
 PC 1.40

## 1D NMR plot parameters

CX 20.00 cm  
 F1P 180.000 ppm  
 F1 18110.29 Hz  
 F2P 0.000 ppm  
 F2 0.00 Hz  
 PPMCM 9.00000 ppm/cm  
 HZCM 905.51471 Hz/cm

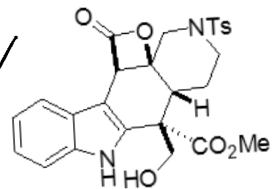

55

FYQ-II-052053P HMQC

H(4)\*2

(all)

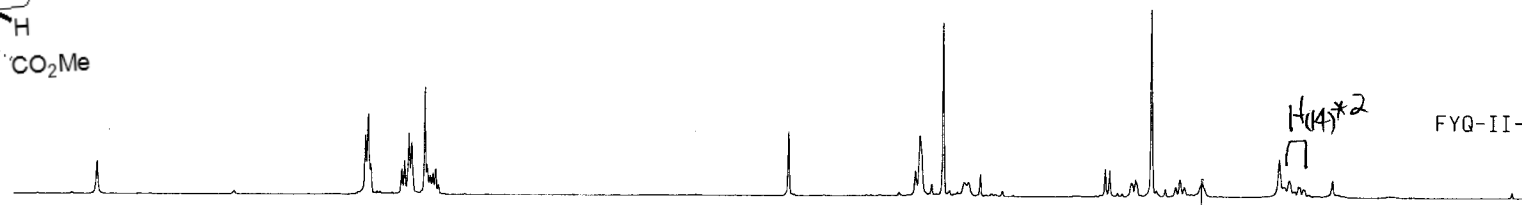

$Ts(CH_2) \rightarrow CH_2$   
 $C_{14} \rightarrow CH_2$   
 $C_{15}(CH) \rightarrow (CH)$   
 $C_3 \rightarrow CH_2$   
 $C_{19} \rightarrow (CH)$   
 $CO_2Me(C_4) \rightarrow (CH)$   
 $C_2(OH) \rightarrow C_{16}$   
 $CH_2 - C_{17}$   
 $C_7(O_6)$   
 $Ar-CH \rightarrow C_{10}/C_{12}$   
 $C_8(O_5) \rightarrow C_9/C_{11}$   
 $Ts(C_1) \rightarrow C_2$   
 $Ts(O_4) \rightarrow C_3$   
 $Ts(O_2) \rightarrow C_2$   
 $Ts(O_1) \rightarrow$

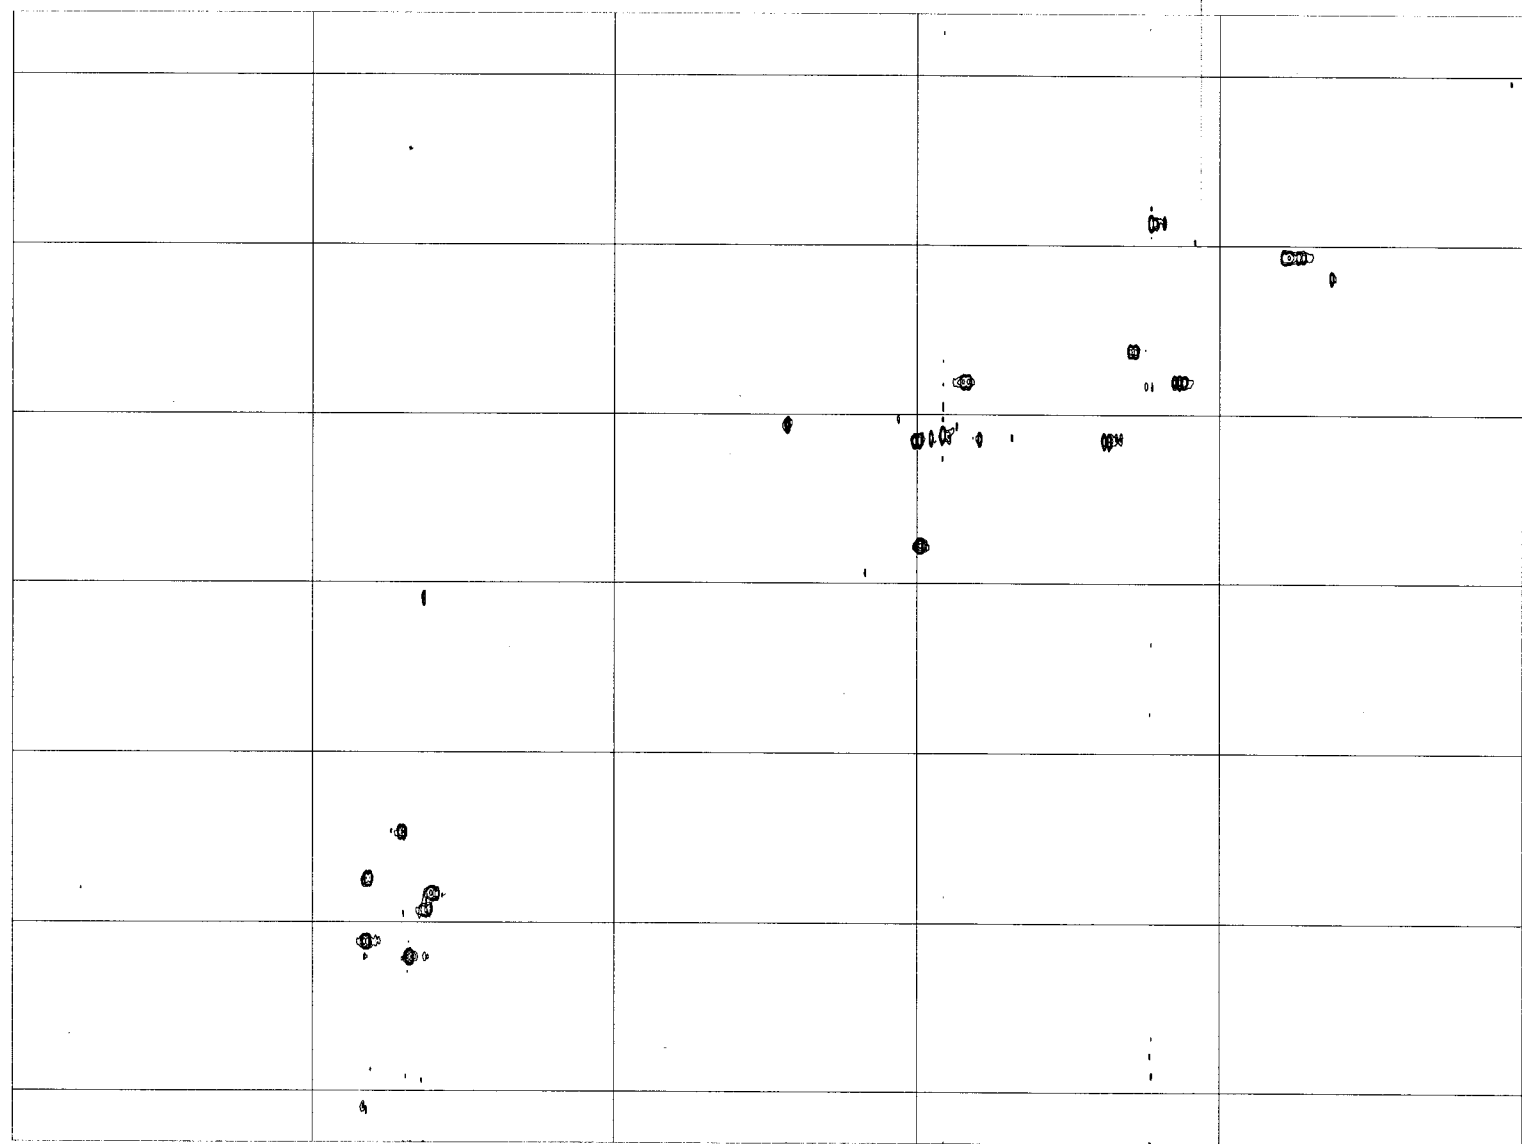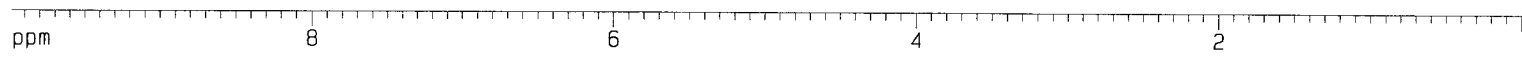

0  
25  
50  
75  
100  
125  
150  
ppm

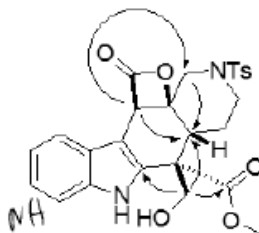

Selected HMBC correlations for  $\alpha$ -Hydroxymethyl Ester 55

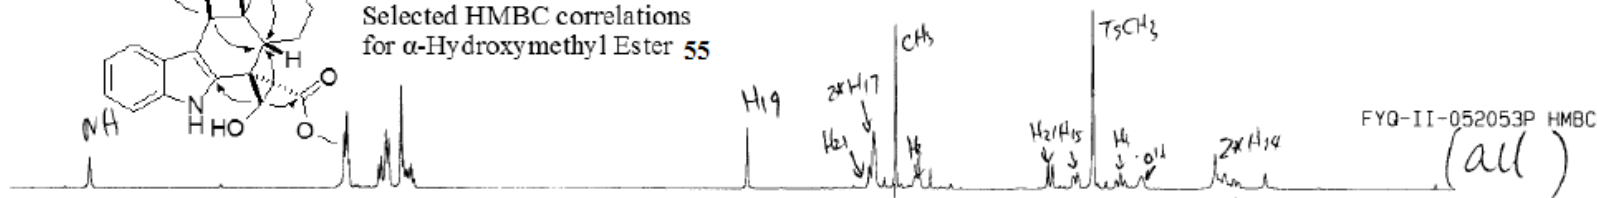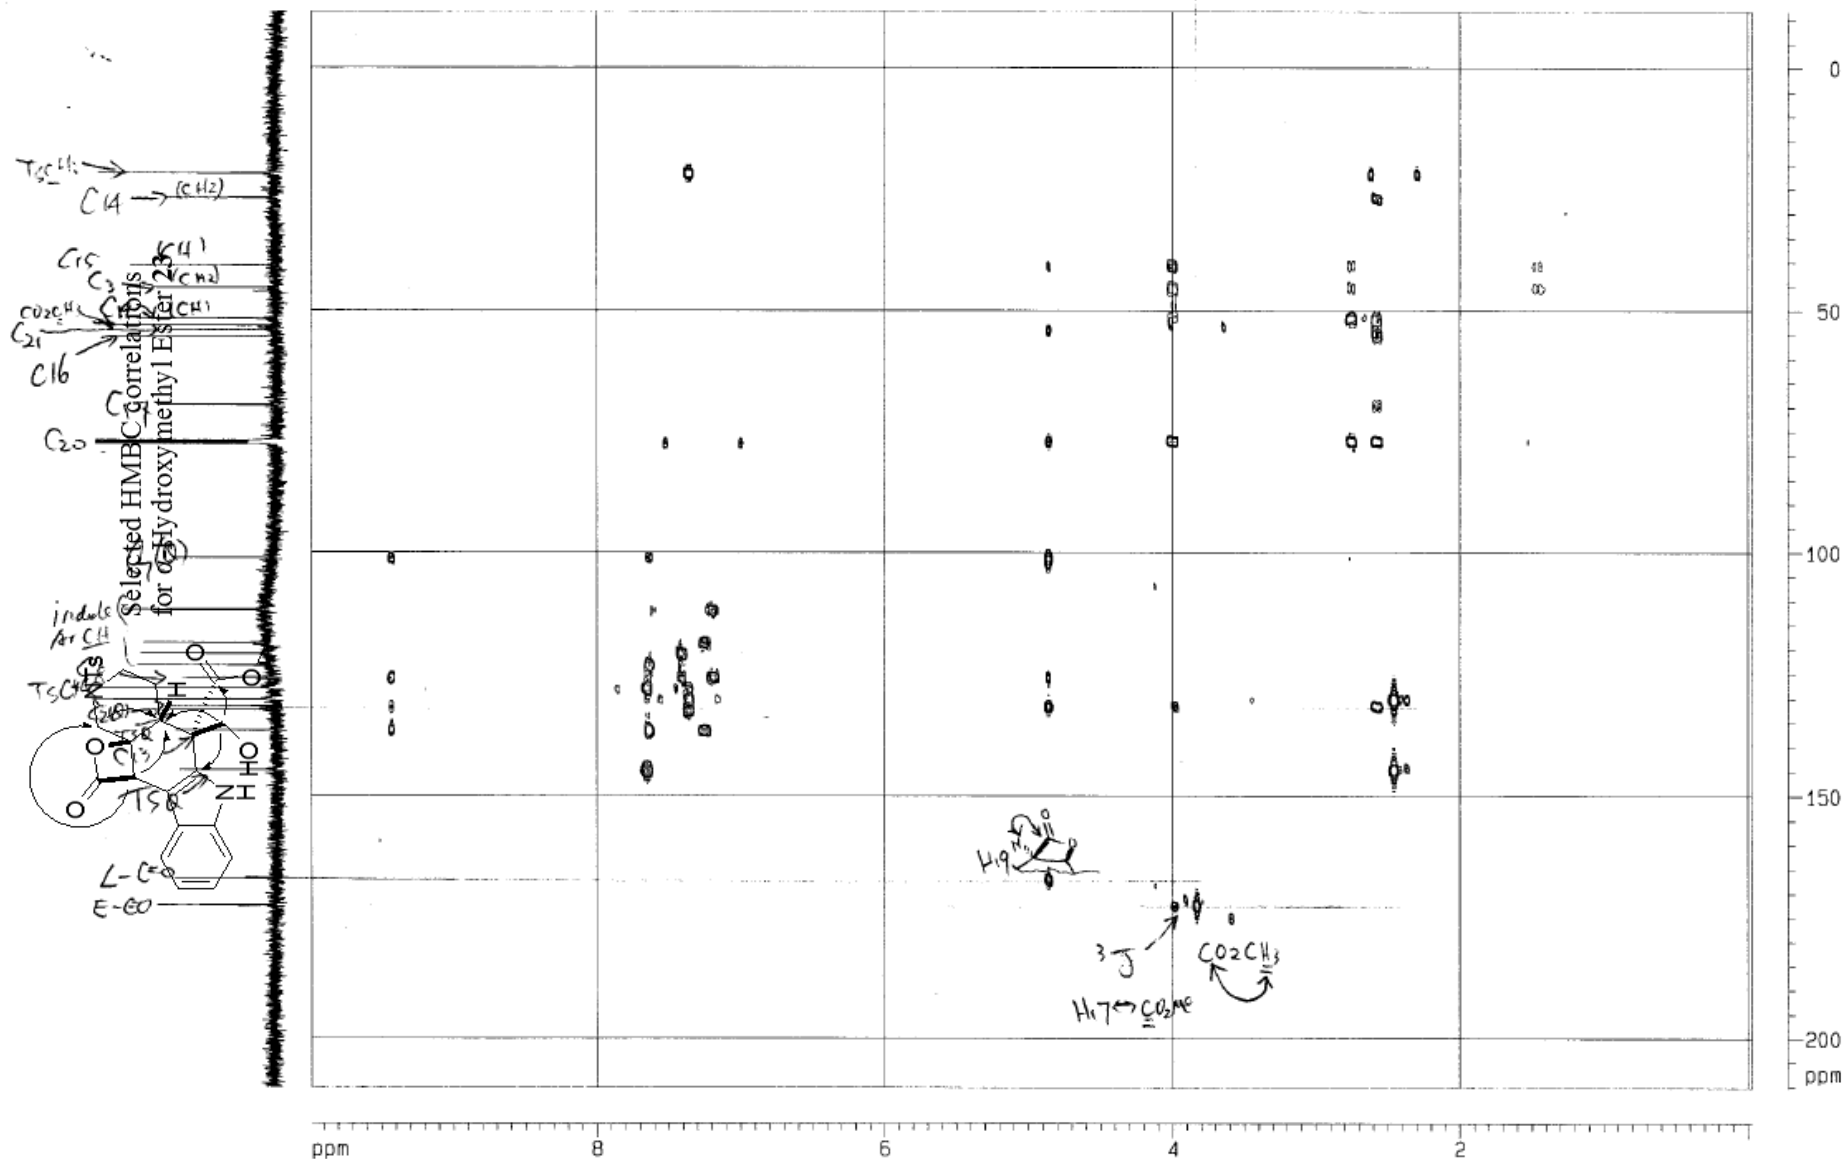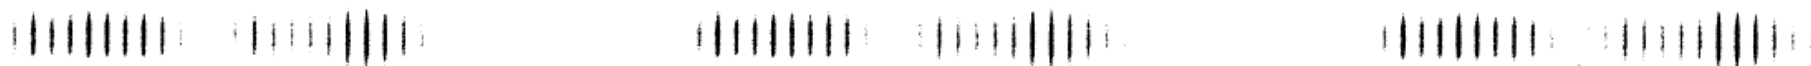

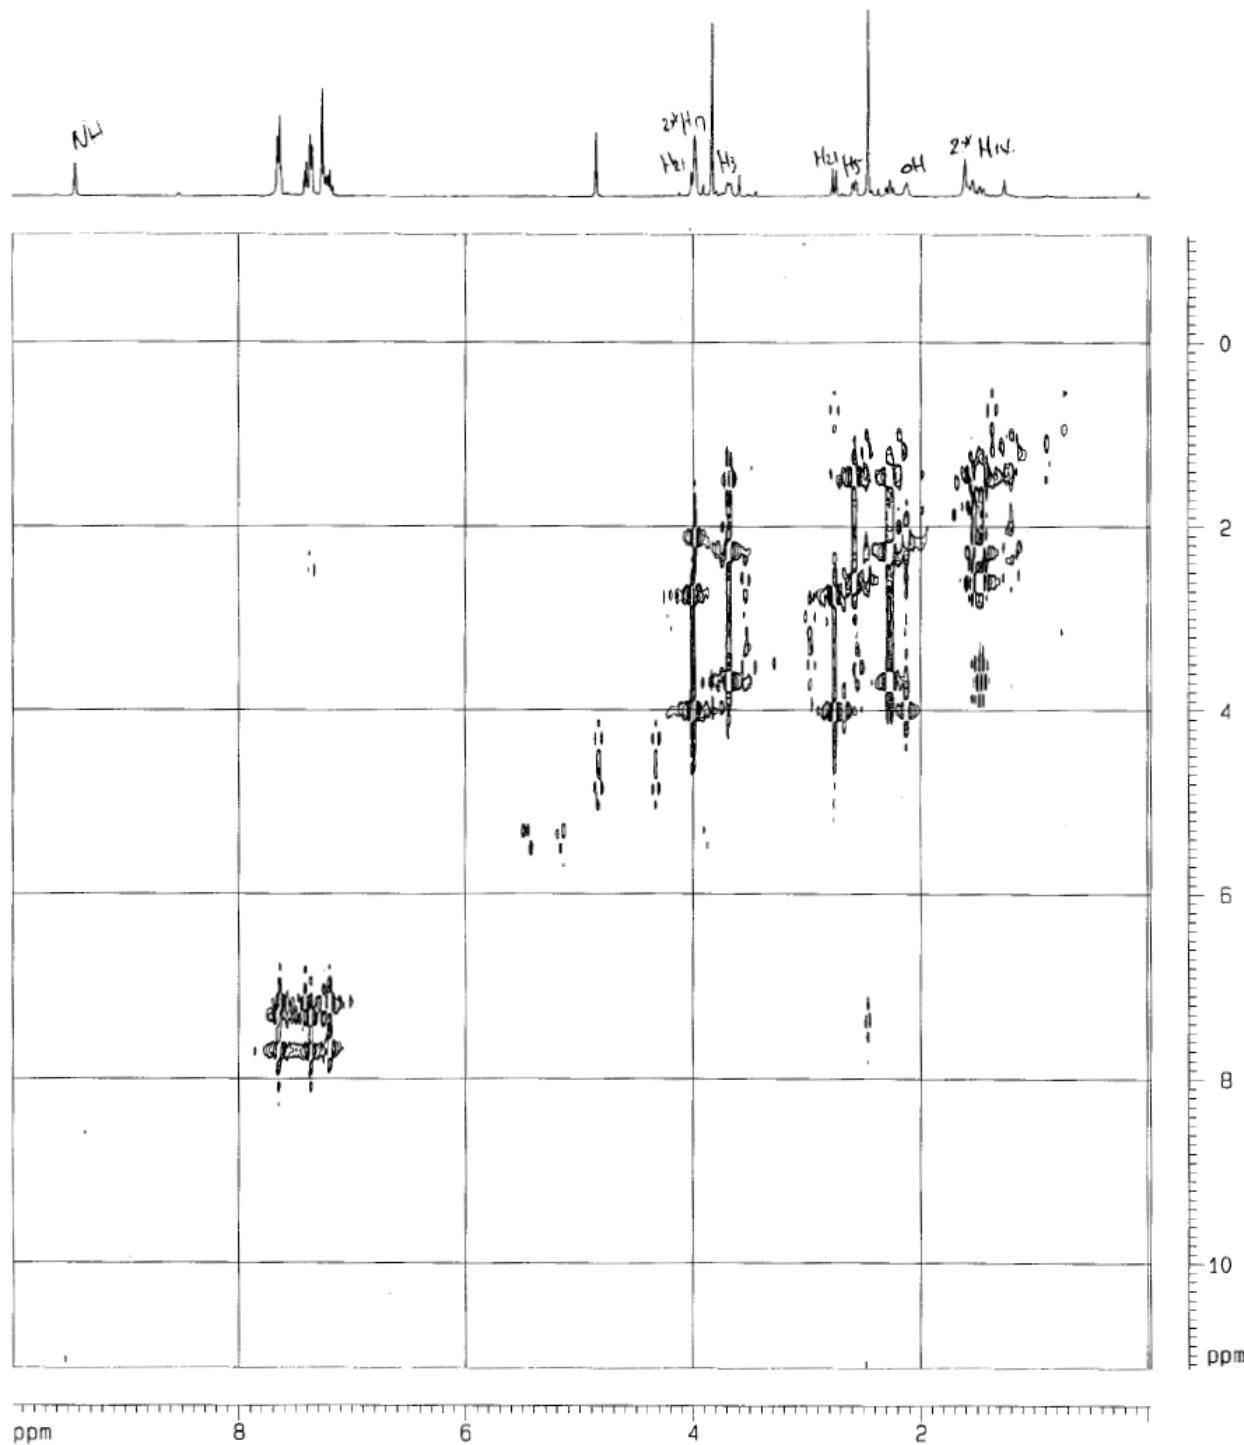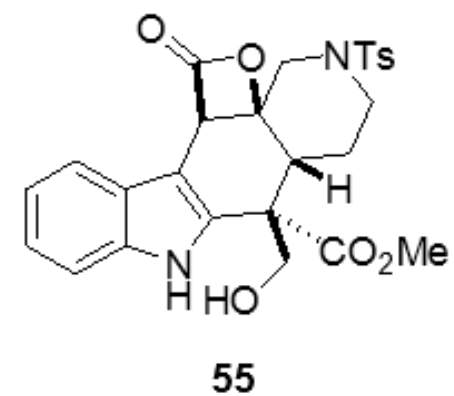

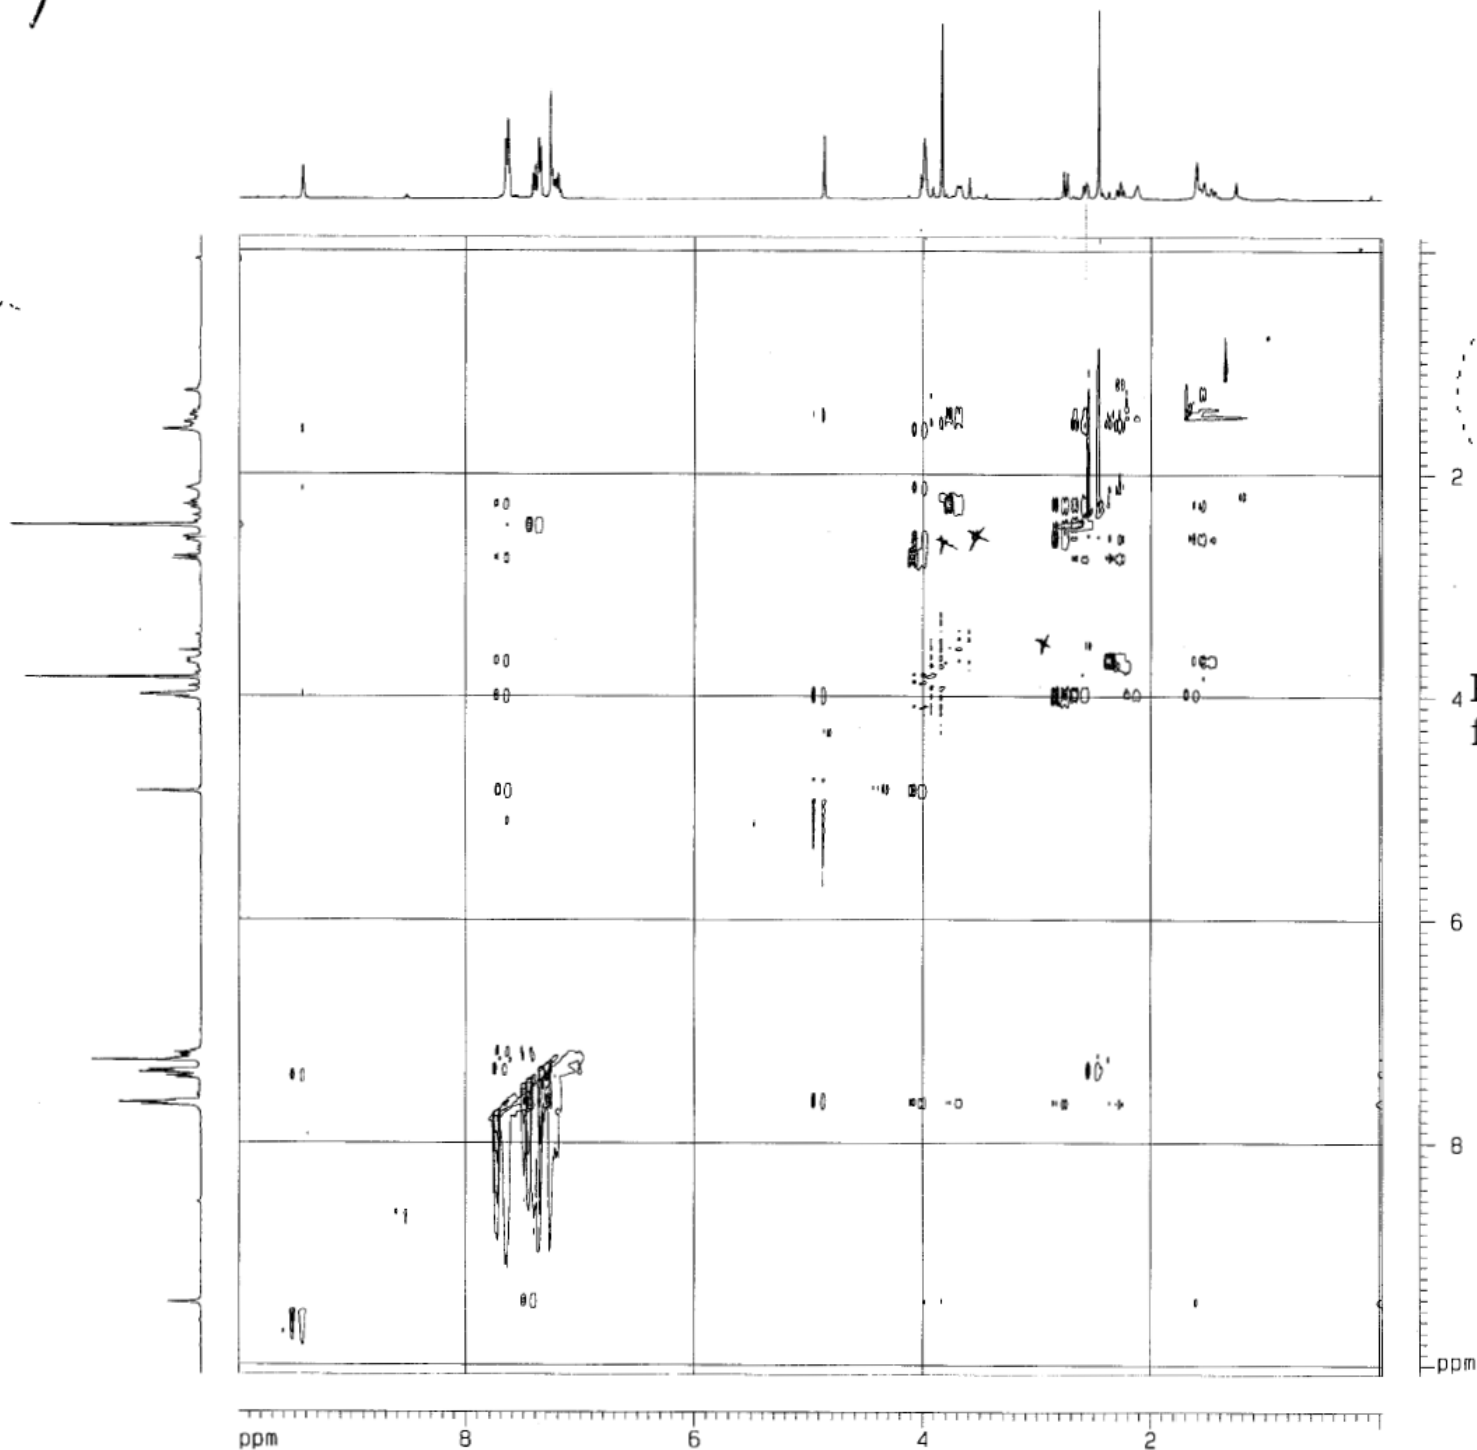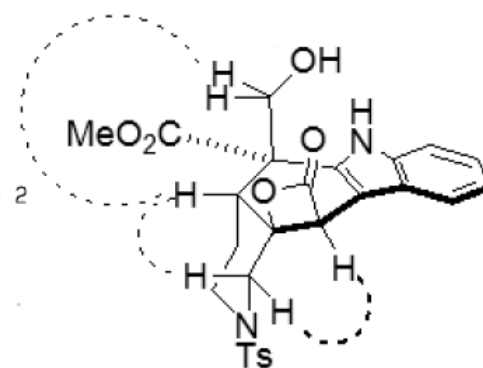

4 Key nOe correlations  
for  $\alpha$ -Hydroxymethyl Ester **55**

--- = nOe correlation

6

8

ppm



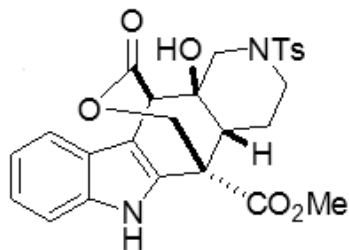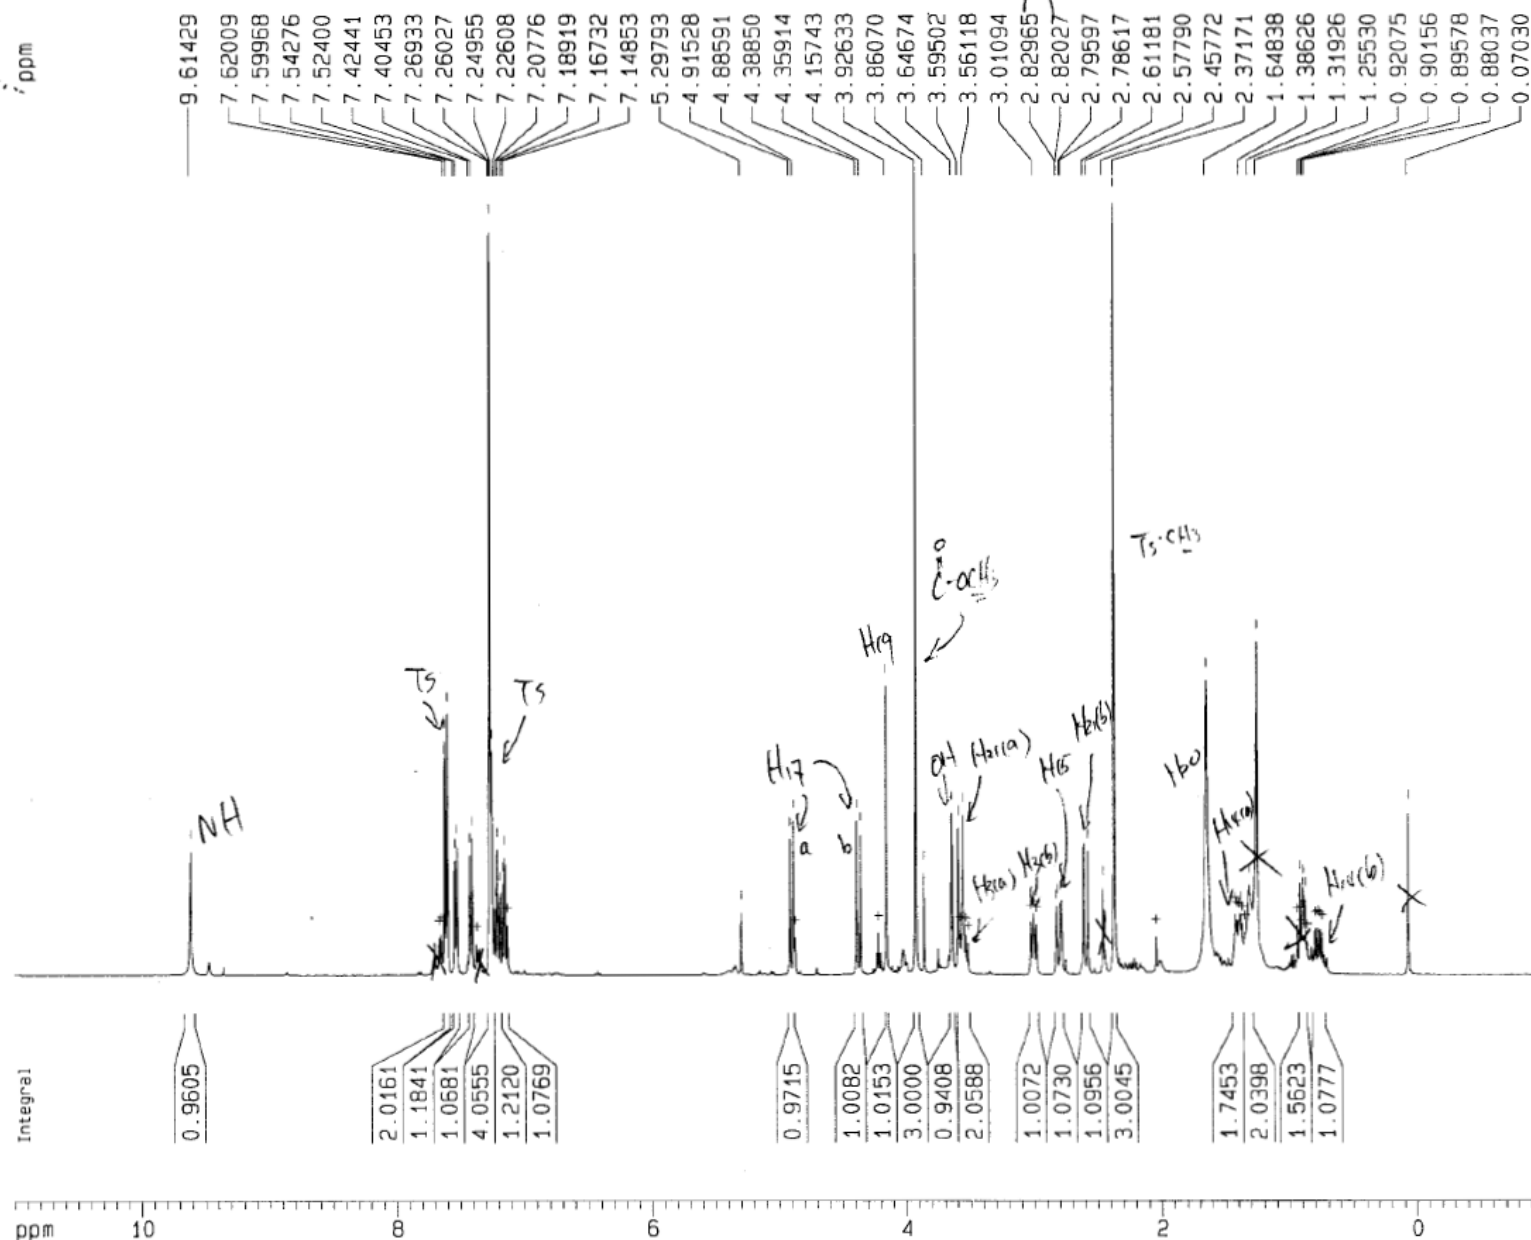

Current Data Parameters  
 NAME 080811FJII-064  
 EXPNO 2  
 PROCNO 1

F2 - Acquisition Parameters  
 Date\_ 20110808  
 Time 18.57  
 INSTRUM spect  
 PROBHD 5 mm BBI 1H-  
 PULPROG zg30  
 TD 65536  
 SOLVENT CDC13  
 NS 16  
 DS 2  
 SWH 8278.146 Hz  
 FIDRES 0.126314 Hz  
 AQ 3.9584243 sec  
 RG 203.2  
 DW 60.400 usec  
 DE 6.00 usec  
 TE 300.0 K  
 D1 1.00000000 sec

----- CHANNEL f1 -----  
 NUC1 1H  
 P1 6.45 usec  
 PL1 0.00 dB  
 SF01 400.1324710 MHz

F2 - Processing parameters  
 SI 32768  
 SF 400.1300091 MHz  
 WDW EM  
 SSB 0  
 LB 0.30 Hz  
 GB 0  
 PC 1.00

1D NMR plot parameters  
 CX 20.00 cm  
 F1P 11.000 ppm  
 F1 4401.43 Hz  
 F2P -1.000 ppm  
 F2 -400.13 Hz  
 PPMCM 0.60000 ppm/cm  
 HZCM 240.07800 Hz/cm

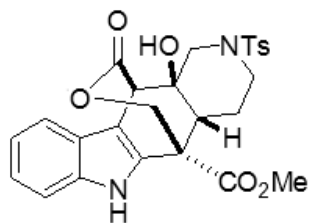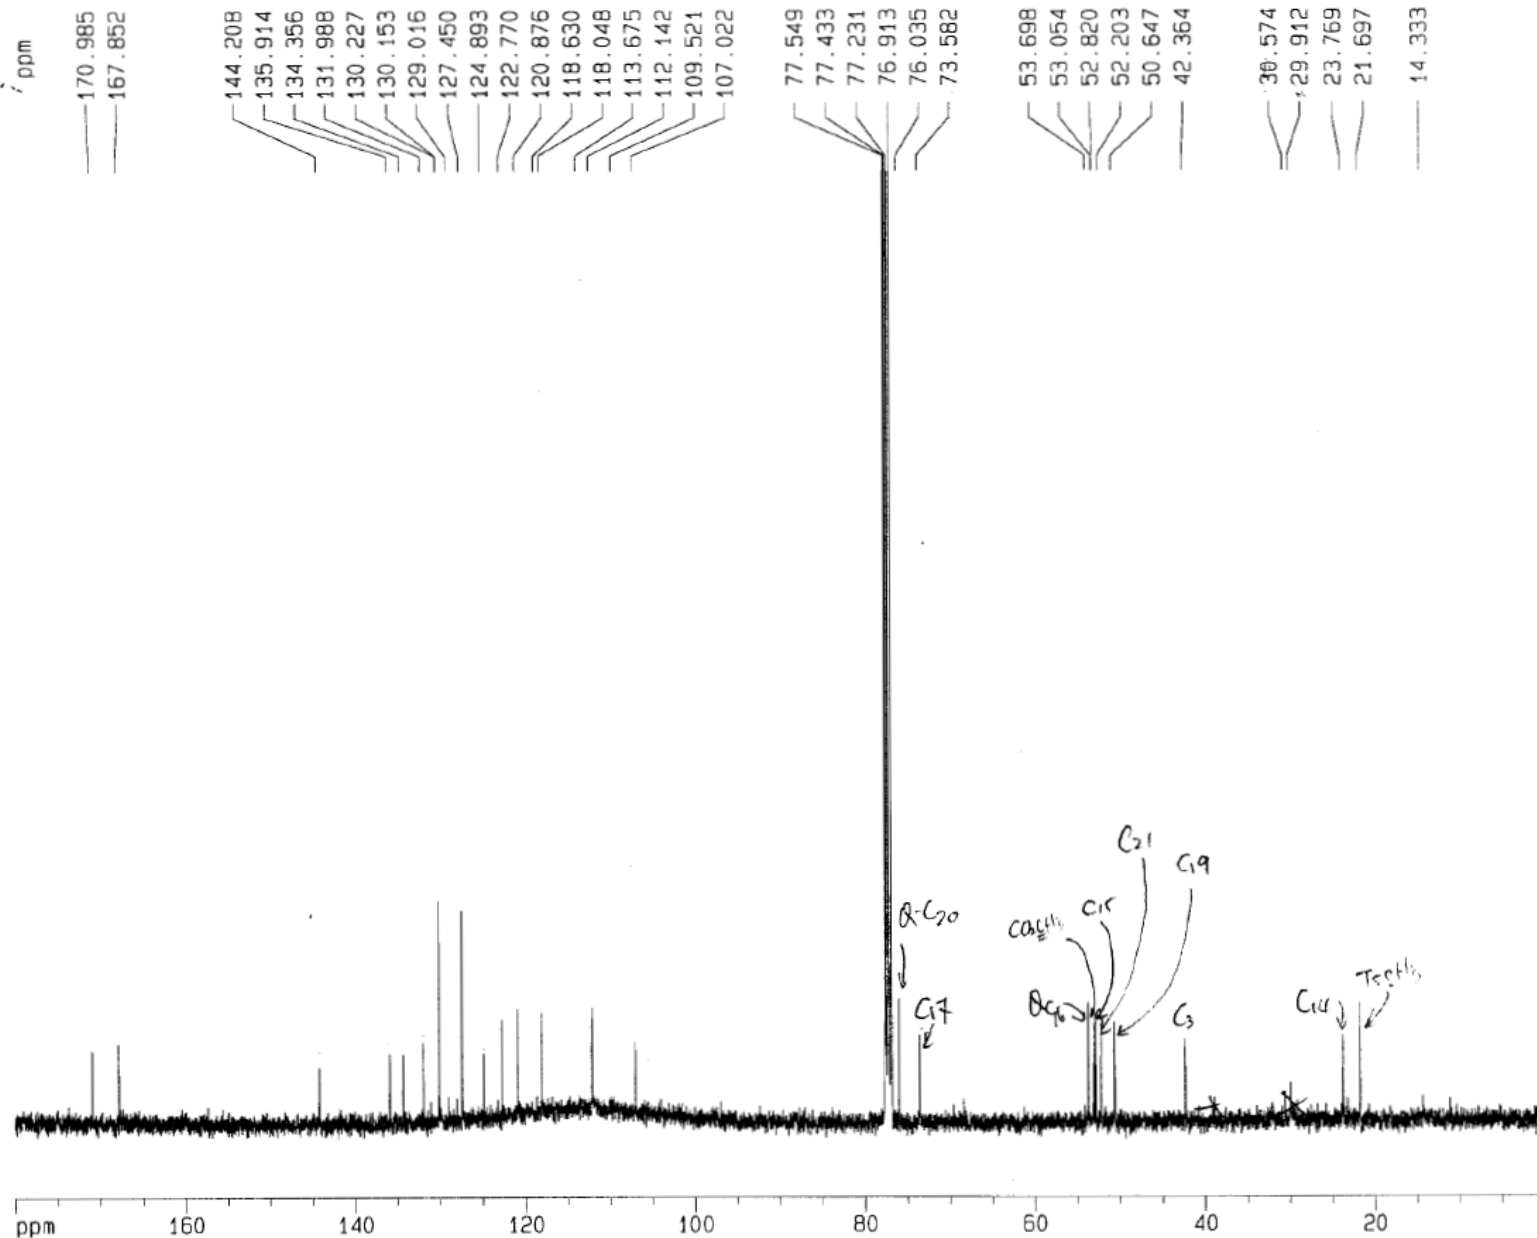

Current Data Parameters  
NAME 080811FJ11-064  
EXPNO 7  
PROCNO 1

F2 - Acquisition Parameters  
Date\_ 20110809  
Time 4.49  
INSTRUM spect  
PROBHD 5 mm BBI 1H-  
PULPROG zgpg30  
TD 65536  
SOLVENT CDCl3  
NS 6144  
DS 4  
SWH 25125.629 Hz  
FIDRES 0.383387 Hz  
AQ 1.3042164 sec  
RG 16384  
DW 19.900 usec  
DE 6.00 usec  
TE 300.0 K  
D1 2.00000000 sec  
d11 0.03000000 sec  
d12 0.00002000 sec

===== CHANNEL f1 =====  
NUC1 13C  
P1 16.35 usec  
PL1 -6.00 dB  
SFO1 100.6237959 MHz

===== CHANNEL f2 =====  
CPDPRG2 waltz16  
NUC2 1H  
PCPD2 114.00 usec  
PL2 0.00 dB  
PL12 24.00 dB  
PL13 24.00 dB  
SFO2 400.1316005 MHz

F2 - Processing parameters  
SI 32768  
SF 100.6127484 MHz  
WDW EM  
SSB 0  
LB 1.00 Hz  
GB 0  
PC 1.40

1D NMR plot parameters  
CX 20.00 cm  
F1P 180.000 ppm  
F1 18110.29 Hz  
F2P 0.000 ppm  
F2 0.00 Hz  
PRMCM 9.00000 ppm/cm  
HZCM 905.51471 Hz/cm

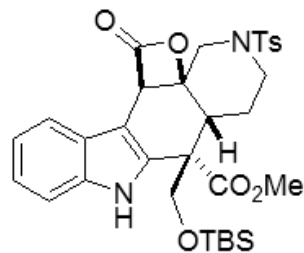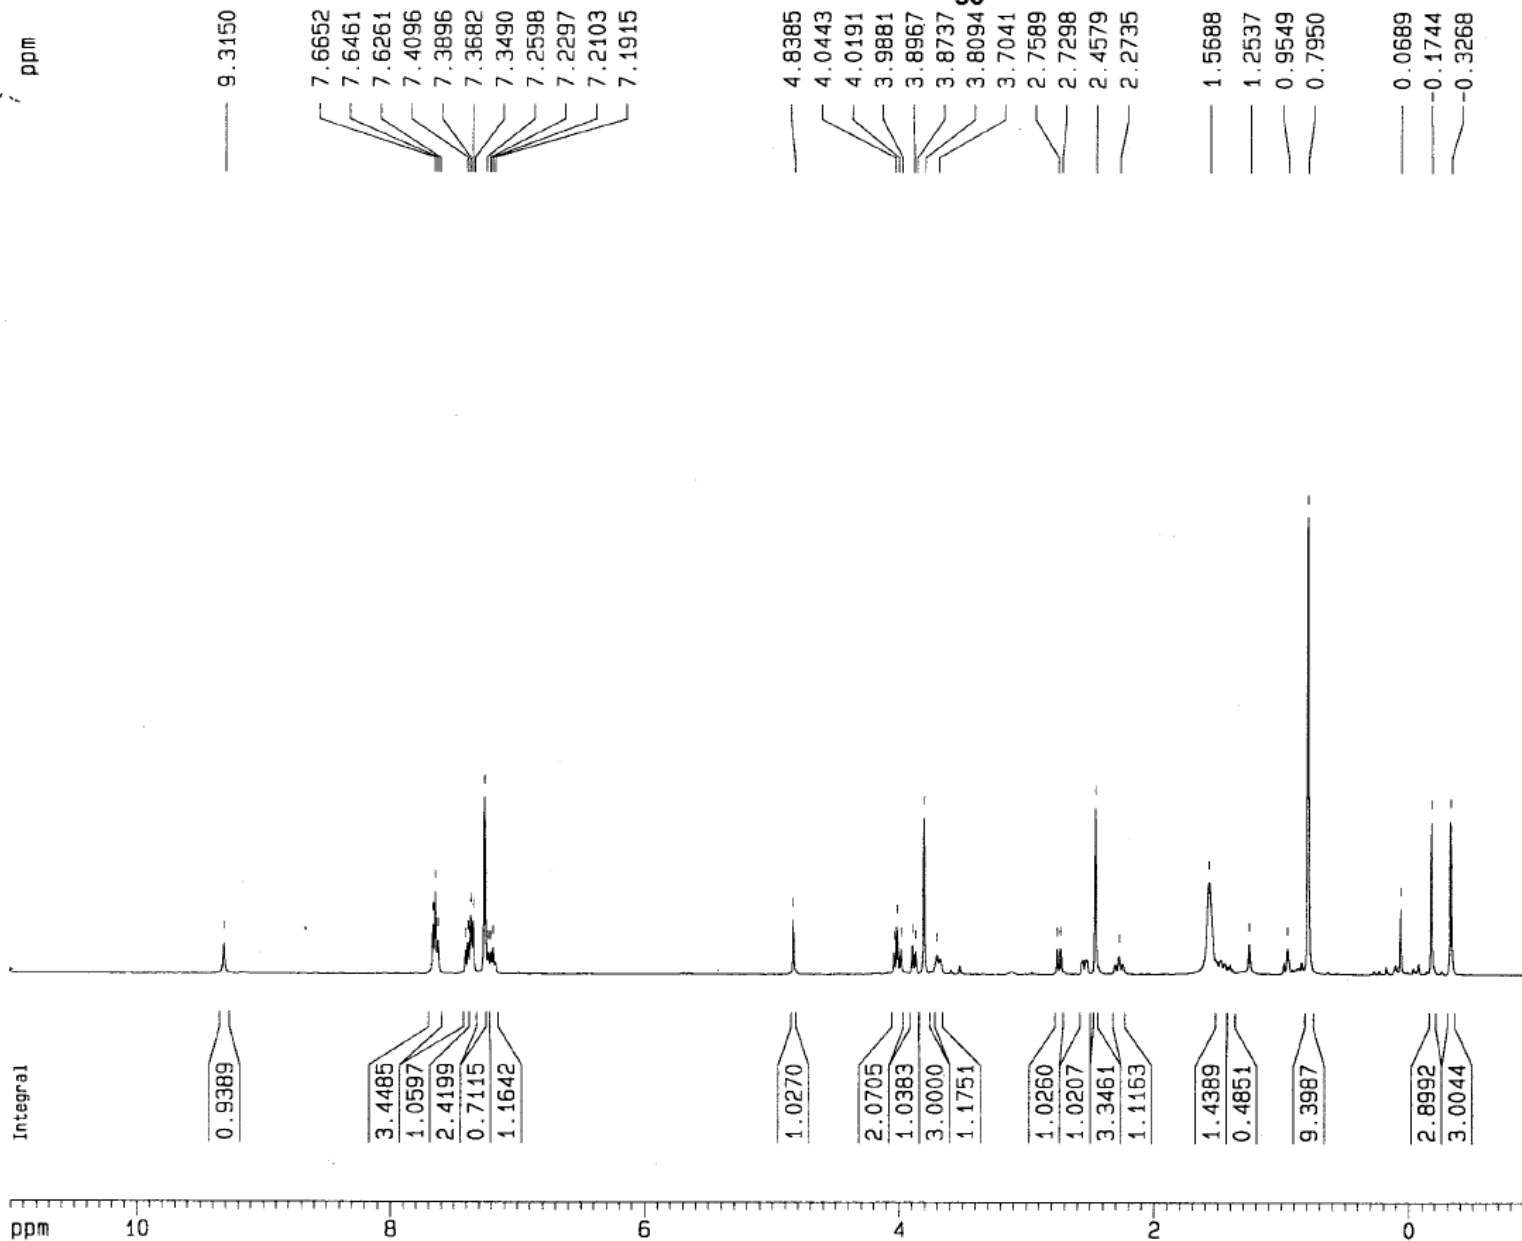

Current Data Parameters  
 NAME 090712FJII291  
 EXPNO 1  
 PROCNO 1

F2 - Acquisition Parameters  
 Date\_ 20120907  
 Time 11.52  
 INSTRUM spect  
 PROBHD 5 mm BBI 1H-  
 PULPROG zg30  
 TD 65536  
 SOLVENT CDCl3  
 NS 32  
 DS 2  
 SWH 8278.146 Hz  
 FIDRES 0.126314 Hz  
 AQ 3.9584243 sec  
 RG 322.5  
 DW 60.400 usec  
 DE 6.00 usec  
 TE 300.0 K  
 D1 1.00000000 sec

===== CHANNEL f1 =====  
 NUC1 1H  
 P1 6.45 usec  
 PL1 0.00 dB  
 SF01 400.1324710 MHz

F2 - Processing parameters  
 SI 32768  
 SF 400.1300096 MHz  
 WDW EM  
 SSB 0  
 LB 0.30 Hz  
 GB 0  
 PC 1.00

1D NMR plot parameters  
 CX 20.00 cm  
 F1P 11.000 ppm  
 F1 4401.43 Hz  
 F2P -1.000 ppm  
 F2 -400.13 Hz  
 PPMCM 0.60000 ppm/cm  
 HZCM 240.07800 Hz/cm

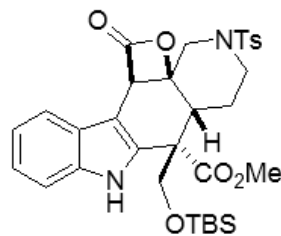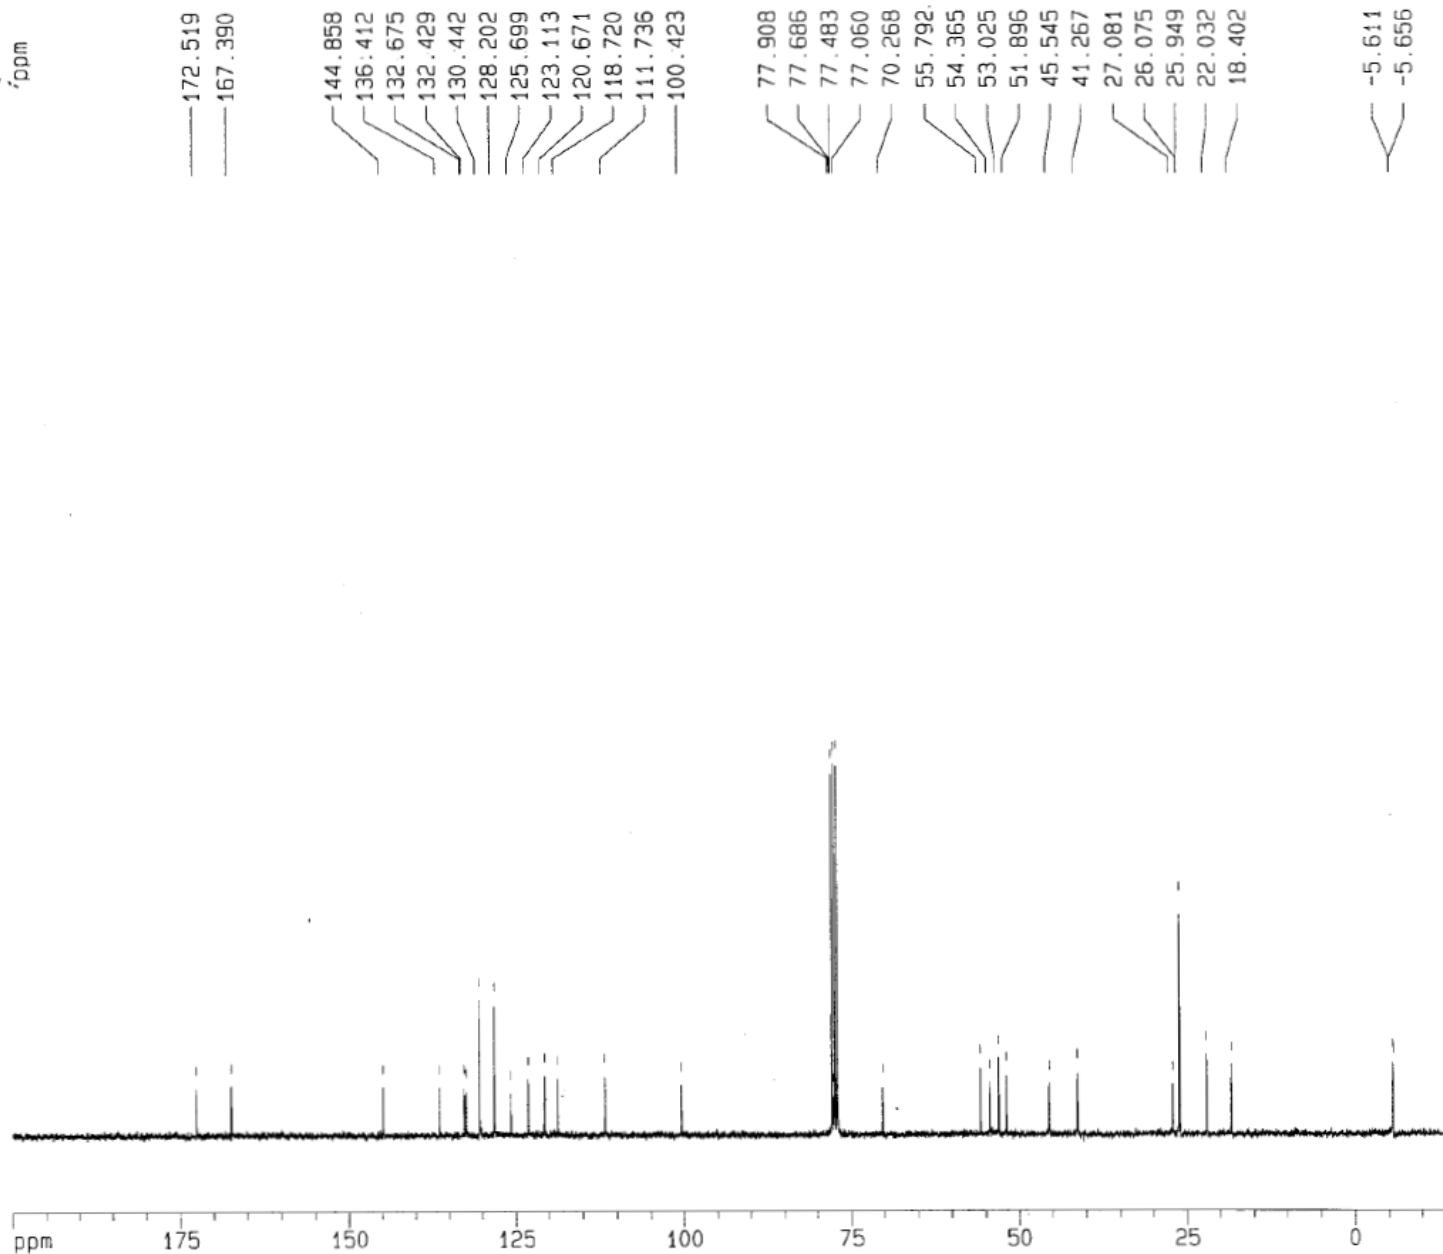

Current Data Parameters  
 NAME 090512FJIII290  
 EXPNO 2  
 PROCNO 1

F2 - Acquisition Parameters  
 Date\_ 20120905  
 Time 17.10  
 INSTRUM spect  
 PROBHD 5 mm GNP 1H/1  
 PULPROG zgpg30  
 TD 65536  
 SOLVENT CDCl3  
 NS 830  
 DS 4  
 SWH 18796.992 Hz  
 FIDRES 0.286819 Hz  
 AQ 1.7433076 sec  
 RG 512  
 DW 26.600 usec  
 DE 6.00 usec  
 TE 300.0 K  
 D1 2.0000000 sec  
 D11 0.0300000 sec  
 D12 0.0000200 sec

===== CHANNEL f1 =====  
 NUC1 13C  
 P1 5.25 usec  
 PL1 -6.00 dB  
 SF01 75.4106357 MHz

===== CHANNEL f2 =====  
 CPDPRG2 waltz16  
 NUC2 1H  
 PCPD2 115.00 usec  
 PL2 0.00 dB  
 PL12 19.70 dB  
 PL13 19.70 dB  
 SF02 299.8711995 MHz

F2 - Processing parameters  
 SI 32768  
 SF 75.4023410 MHz  
 WDW EM  
 SSB 0  
 LB 1.00 Hz  
 GB 0  
 PC 1.40

1D NMR plot parameters  
 CX 20.00 cm  
 F1P 200.000 ppm  
 F1 15080.47 Hz  
 F2P -30.000 ppm  
 F2 -2262.07 Hz  
 PPMCM 11.50000 ppm/cm  
 HZCM 867.12695 Hz/cm

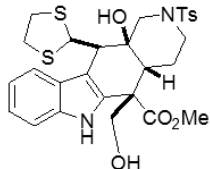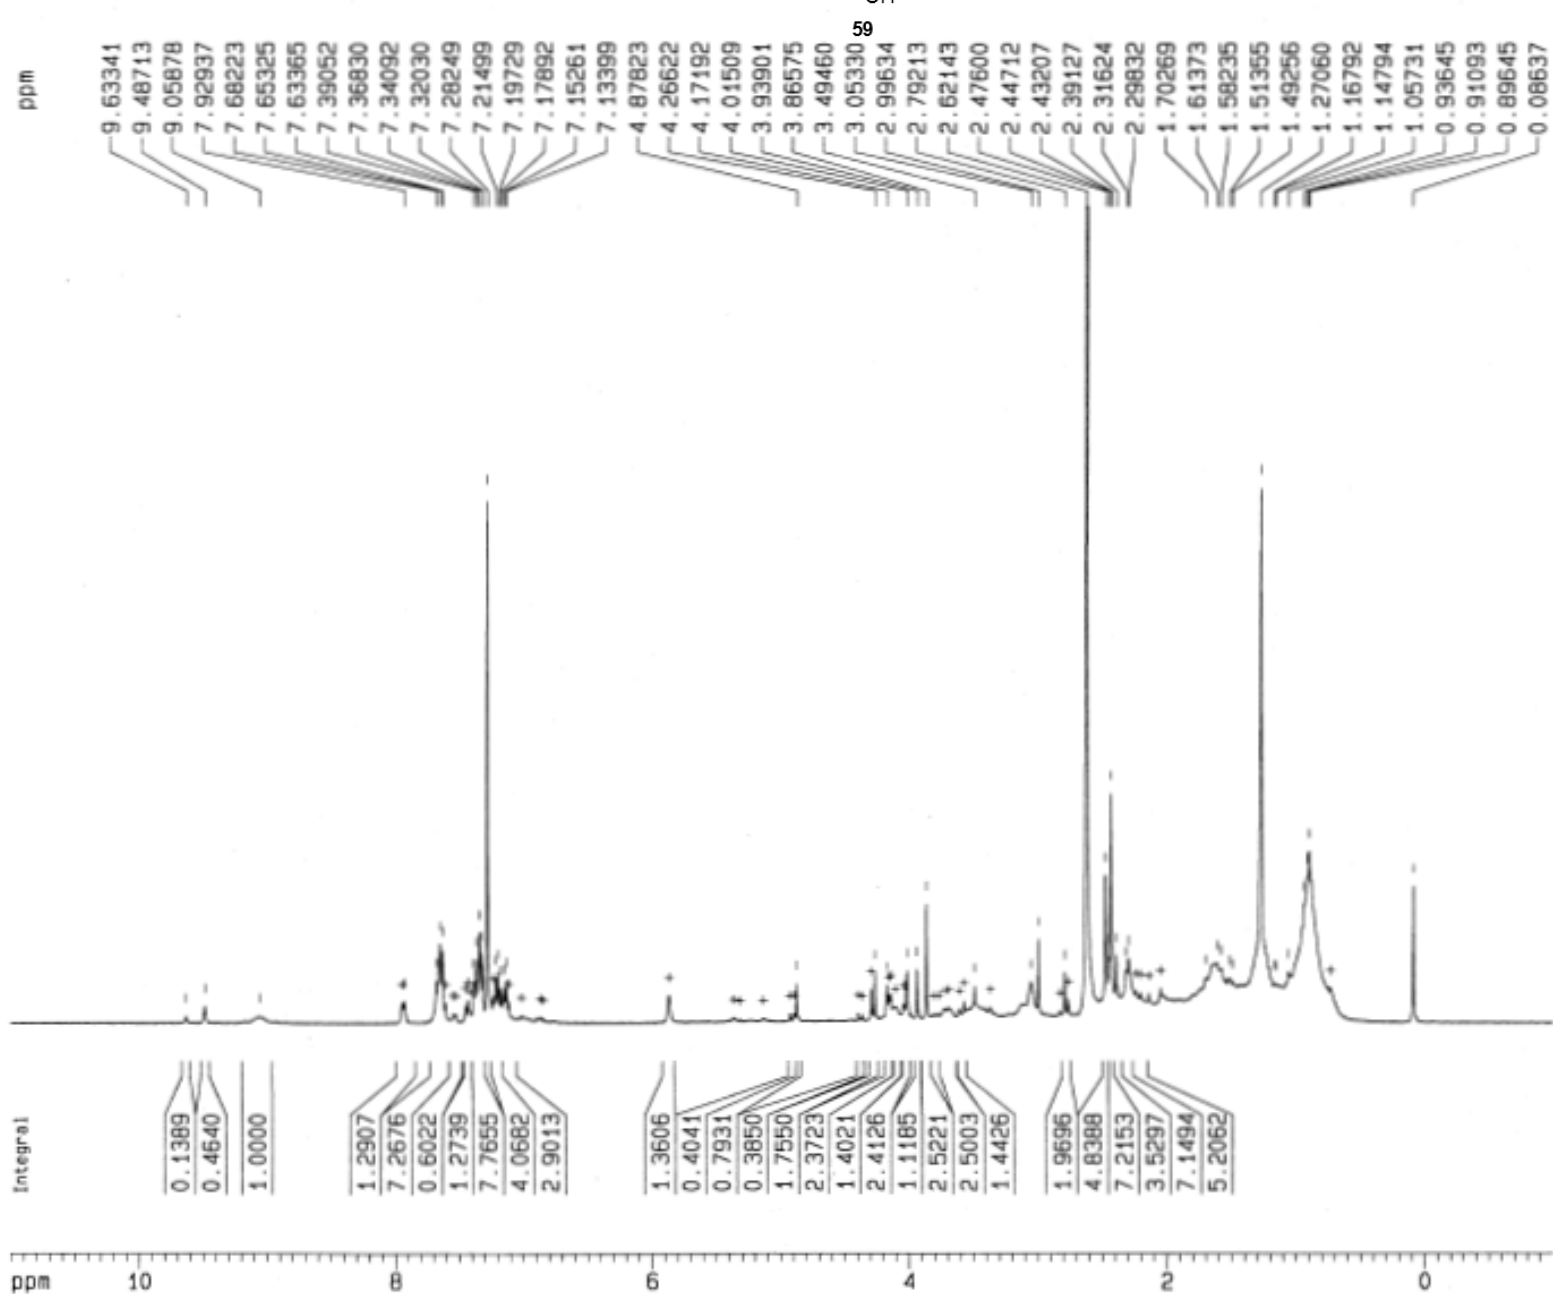

## Current Data Parameters

NAME 060112FJIII175  
EXPNO 1  
PROCNO 1

## F2 - Acquisition Parameters

Date\_ 20120602  
Time 1.07  
INSTRUM spect  
PROBHD 5 mm BBI 1H-  
PULPROG zg30  
TD 65536  
SOLVENT CDCl3  
NS 16  
DS 2  
SWH 8278.146 Hz  
FIDRES 0.126314 Hz  
AQ 3.9584243 sec  
RG 114  
DW 60.400 usec  
DE 6.00 usec  
TE 300.0 K  
D1 1.00000000 sec

## ----- CHANNEL f1 -----

NUC1 1H  
P1 6.45 usec  
PL1 0.00 dB  
SFO1 400.1324710 MHz

## F2 - Processing parameters

SI 32768  
SF 400.1300000 MHz  
WDW no  
SSB 0  
LB 0.00 Hz  
GB 0  
PC 1.00

## 1D NMR plot parameters

CX 20.00 cm  
F1P 11.000 ppm  
F1 4401.43 Hz  
F2P -1.000 ppm  
F2 -400.13 Hz  
PPMCM 0.60000 ppm/cm  
HZCM 240.07800 Hz/cm

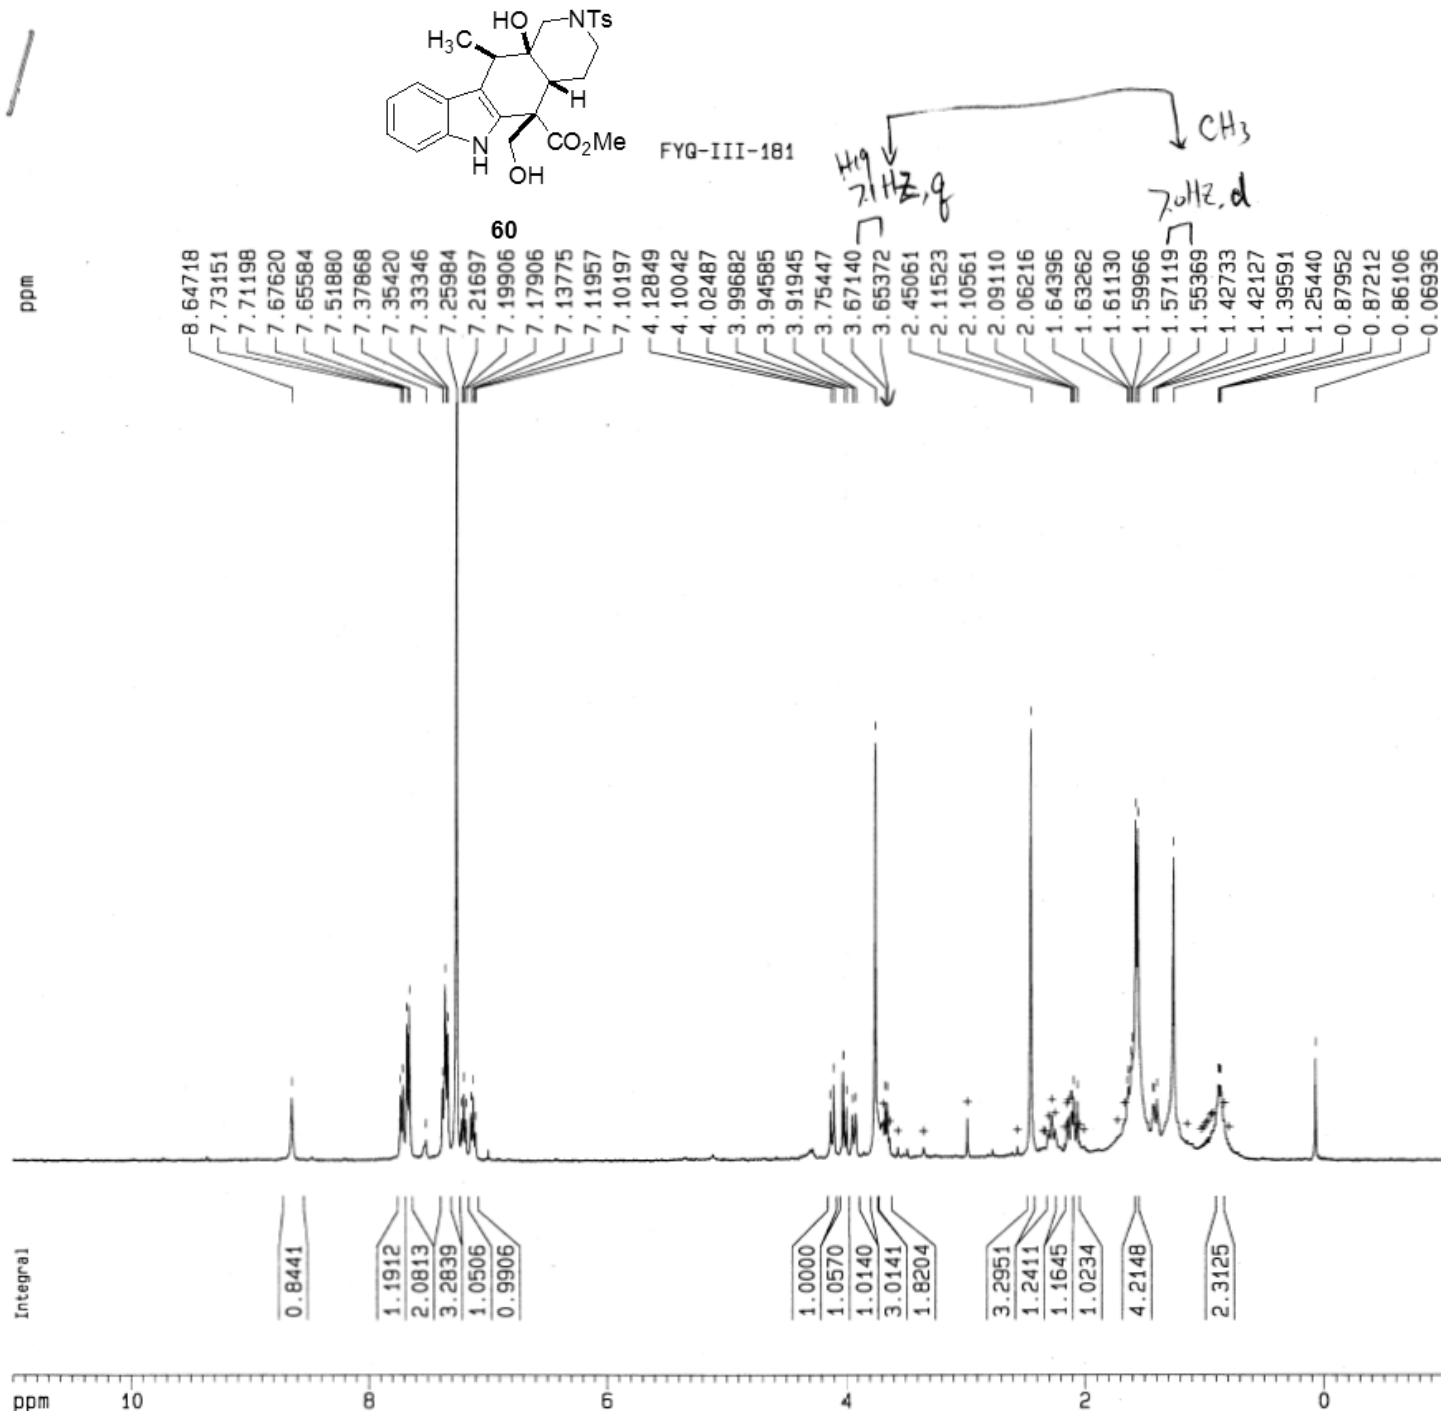

## Current Data Parameters

NAME 060512FJIII181  
EXPNO 1  
PROCNO 1

## F2 - Acquisition Parameters

Date\_ 20120605  
Time 13.52  
INSTRUM spect  
PROBHD 5 mm BBI 1H-  
PULPROG zg30  
TD 65536  
SOLVENT CDCl3  
NS 256  
DS 2  
SWH 8278.146 Hz  
FIDRES 0.126314 Hz  
AQ 3.9584243 sec  
RG 4597.6  
DW 60.400 usec  
DE 6.00 usec  
TE 300.0 K  
D1 1.00000000 sec

## ----- CHANNEL f1 -----

NUC1 1H  
P1 6.45 usec  
PL1 0.00 dB  
SFO1 400.1324710 MHz

## F2 - Processing parameters

SI 32768  
SF 400.1300089 MHz  
WDW EM  
SSB 0  
LB 0.30 Hz  
GB 0  
PC 1.00

## 1D NMR plot parameters

CX 20.00 cm  
F1P 11.000 ppm  
F1 4401.43 Hz  
F2P -1.000 ppm  
F2 -400.13 Hz  
PPMCM 0.50000 ppm/cm  
HZCM 240.07800 Hz/cm

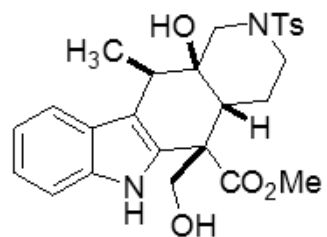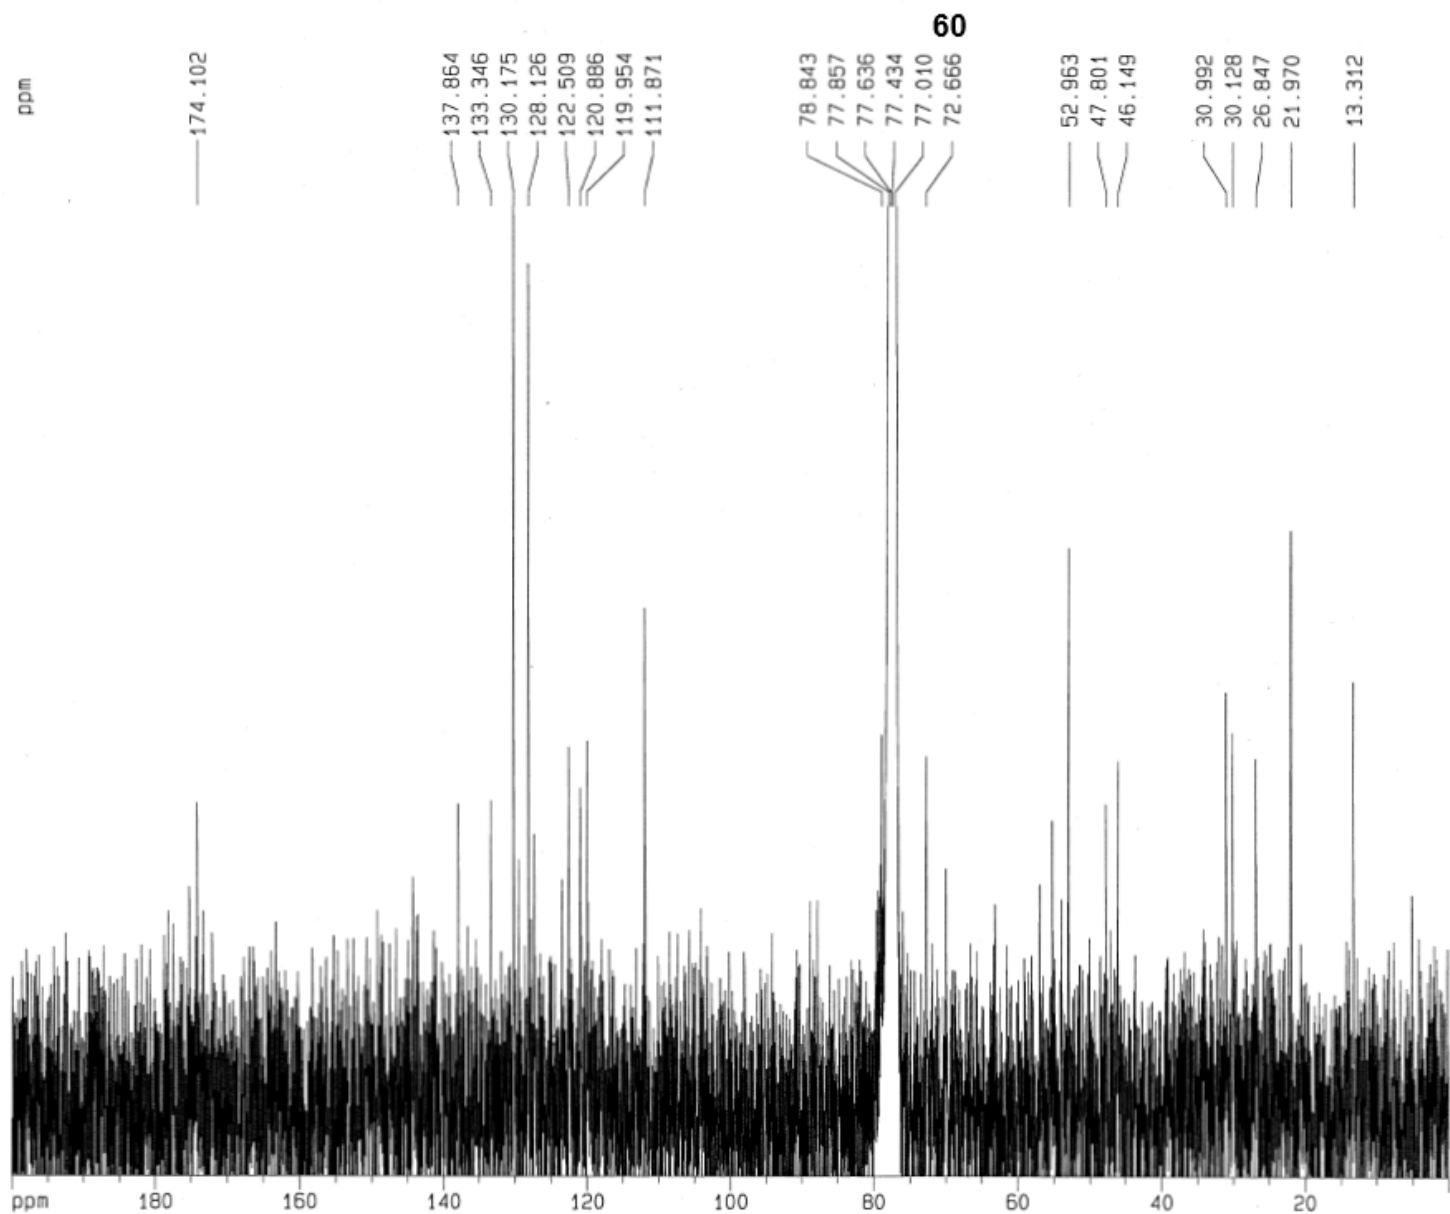

Current Data Parameters  
NAME 060512FJ11181  
EXPNO 1  
PROCNO 1

F2 - Acquisition Parameters  
Date\_ 20120606  
Time 6.40  
INSTRUM spect  
PROBHD 5 mm QNP 1H/1  
PULPROG zgpg30  
TD 65536  
SOLVENT CDC13  
NS 13107  
DS 4  
SWH 18796.992 Hz  
FIDRES 0.286819 Hz  
AQ 1.7433076 sec  
RG 1024  
DM 26.600 usec  
DE 6.00 usec  
TE 300.0 K  
D1 2.00000000 sec  
D11 0.03000000 sec  
D12 0.00002000 sec

----- CHANNEL f1 -----  
NUC1 13C  
P1 5.25 usec  
PL1 -6.00 dB  
SF01 75.4106357 MHz

----- CHANNEL f2 -----  
CPDPRG2 waltz16  
NUC2 1H  
PCPD2 115.00 usec  
PL2 0.00 dB  
PL12 19.70 dB  
PL13 19.70 dB  
SF02 299.8711995 MHz

F2 - Processing parameters  
SI 32768  
SF 75.4023410 MHz  
WDW EM  
SSB 0  
LB 1.00 Hz  
GB 0  
PC 1.40

1D NMR plot parameters  
CX 20.00 cm  
F1P 200.000 ppm  
F1 15080.47 Hz  
F2P 0.000 ppm  
F2 0.00 Hz  
PPMCM 10.00000 ppm/cm  
HZCM 754.02344 Hz/cm

FYQ-III-181 NOESY

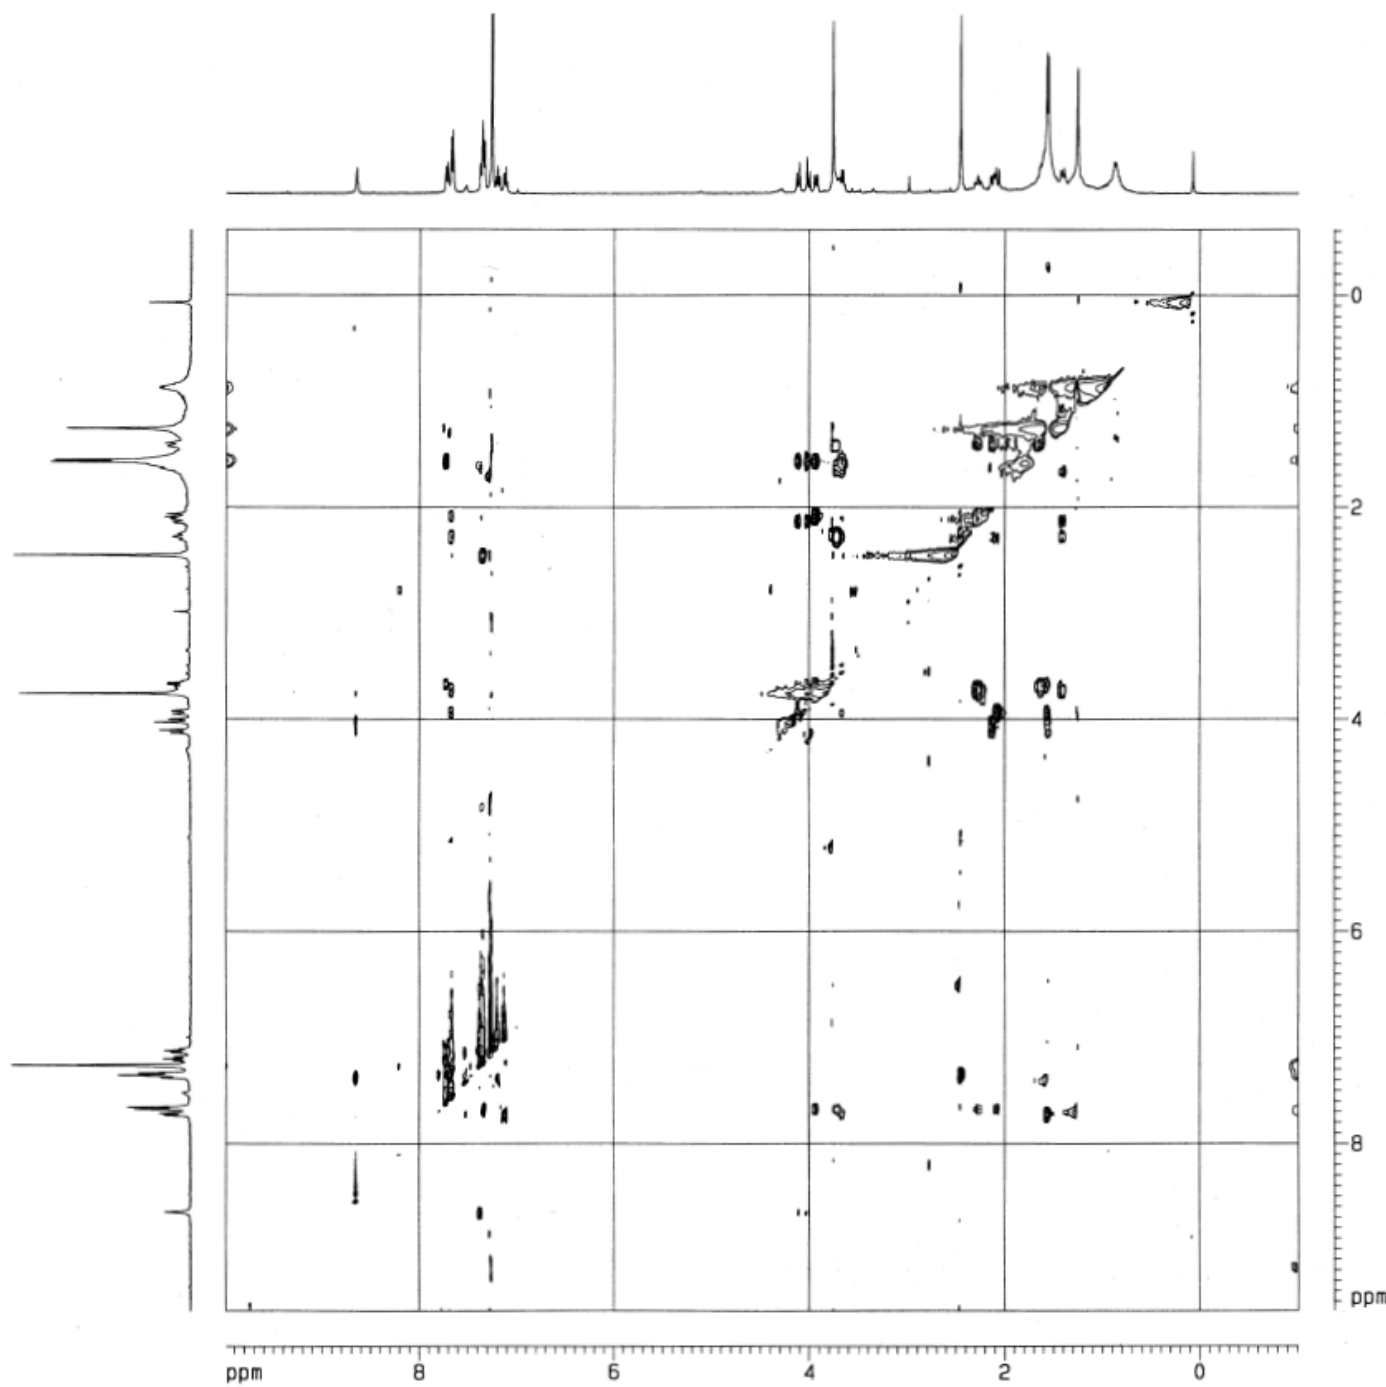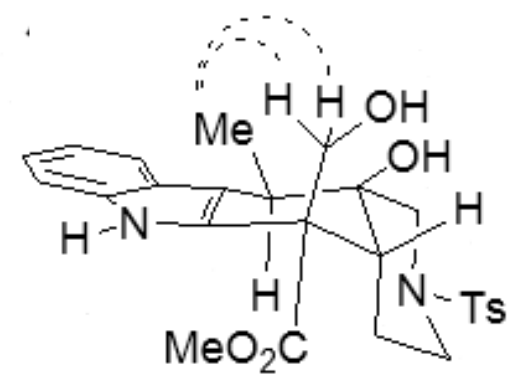

60

selected nOe: ----



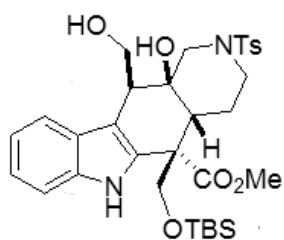

61

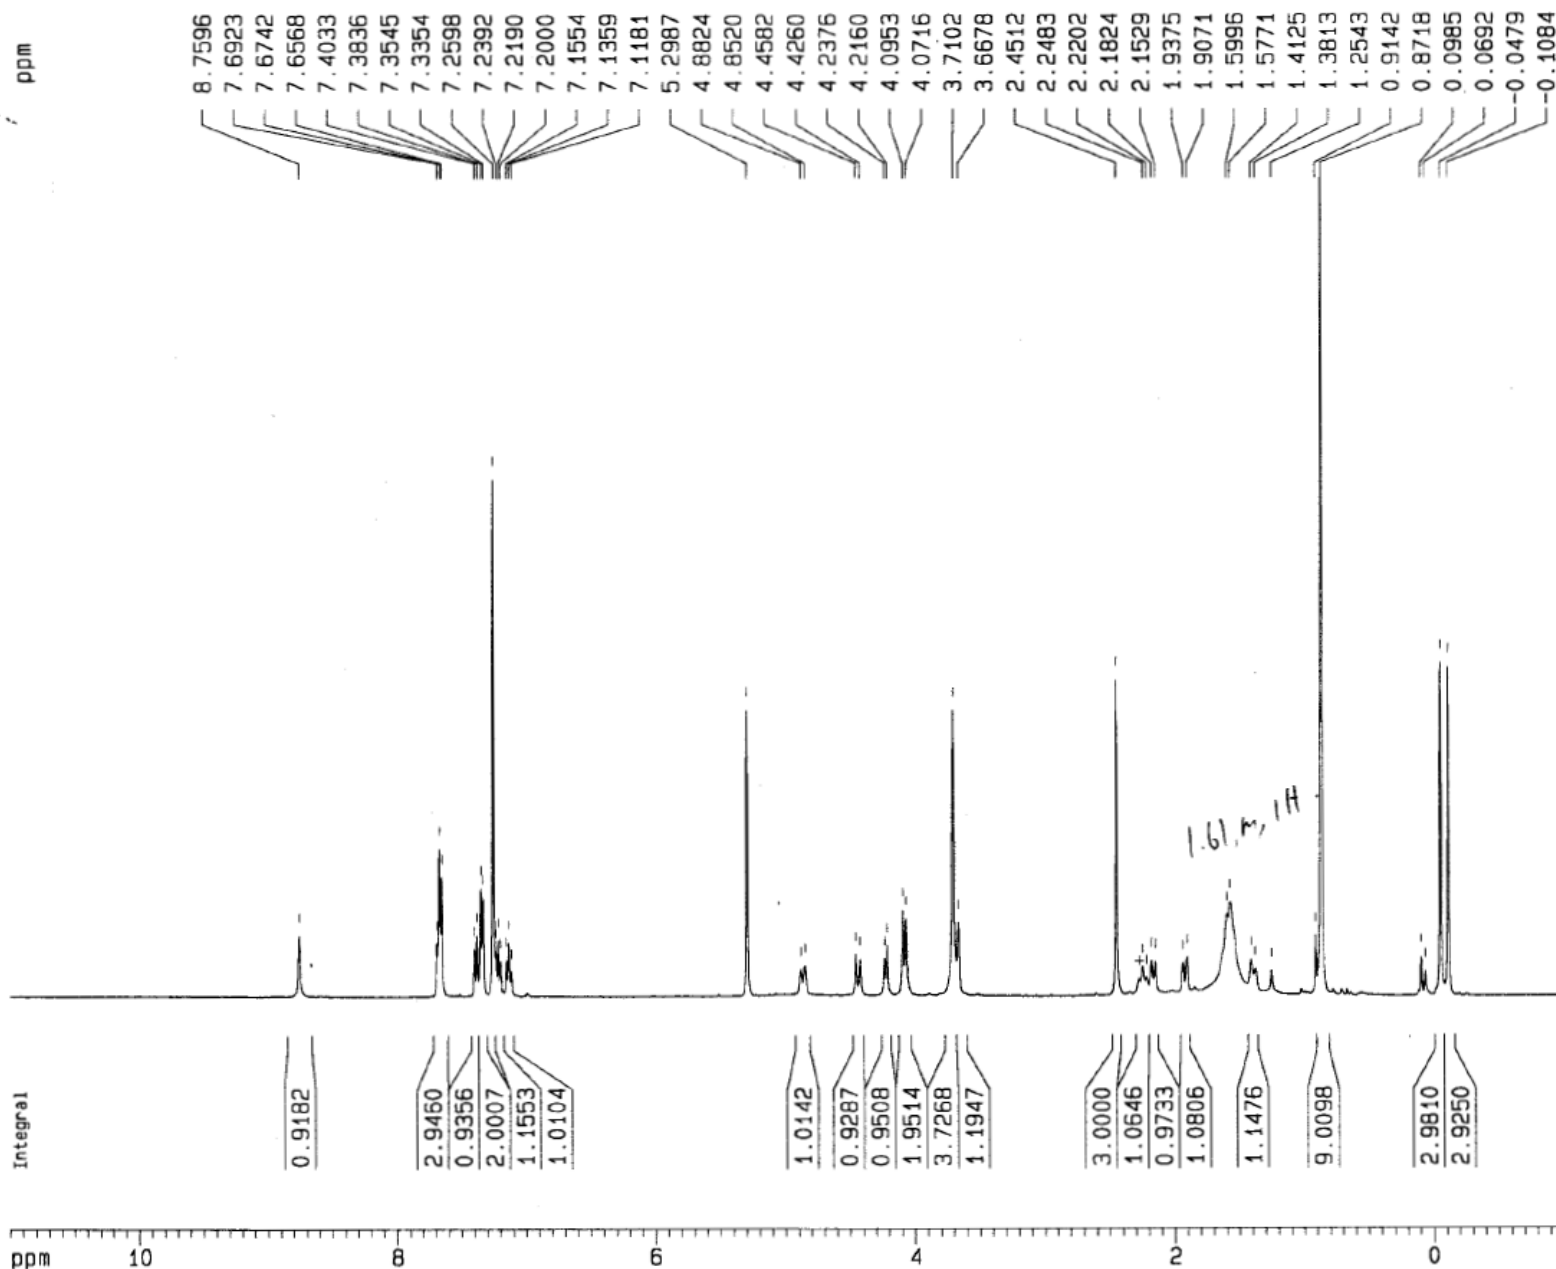

Current Data Parameters  
 NAME 090712FJIII292  
 EXPNO 1  
 PROCNO 1

F2 - Acquisition Parameters  
 Date\_ 20120907  
 Time 11.45  
 INSTRUM spect  
 PROBHD 5 mm BBI 1H-  
 PULPROG zg30  
 TD 65536  
 SOLVENT CDCl3  
 NS 16  
 DS 2  
 SWH 8278.146 Hz  
 FIDRES 0.126314 Hz  
 AQ 3.9584243 sec  
 RG 456.1  
 DW 60.400 usec  
 DE 6.00 usec  
 TE 300.0 K  
 D1 1.0000000 sec

----- CHANNEL f1 -----  
 NUC1 1H  
 P1 6.45 usec  
 PL1 0.00 dB  
 SFO1 400.1324710 MHz

F2 - Processing parameters  
 SI 32768  
 SF 400.1300095 MHz  
 WDM EM  
 SSB 0  
 LB 0.30 Hz  
 GB 0  
 PC 1.00

1D NMR plot parameters  
 CX 20.00 cm  
 F1P 11.000 ppm  
 F1 4401.43 Hz  
 F2P -1.000 ppm  
 F2 -400.13 Hz  
 PPMCM 0.60000 ppm/cm  
 HZCM 240.07800 Hz/cm

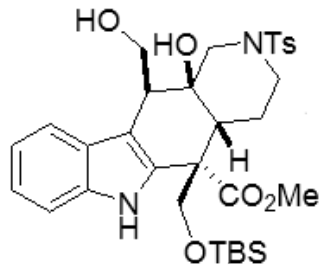

61

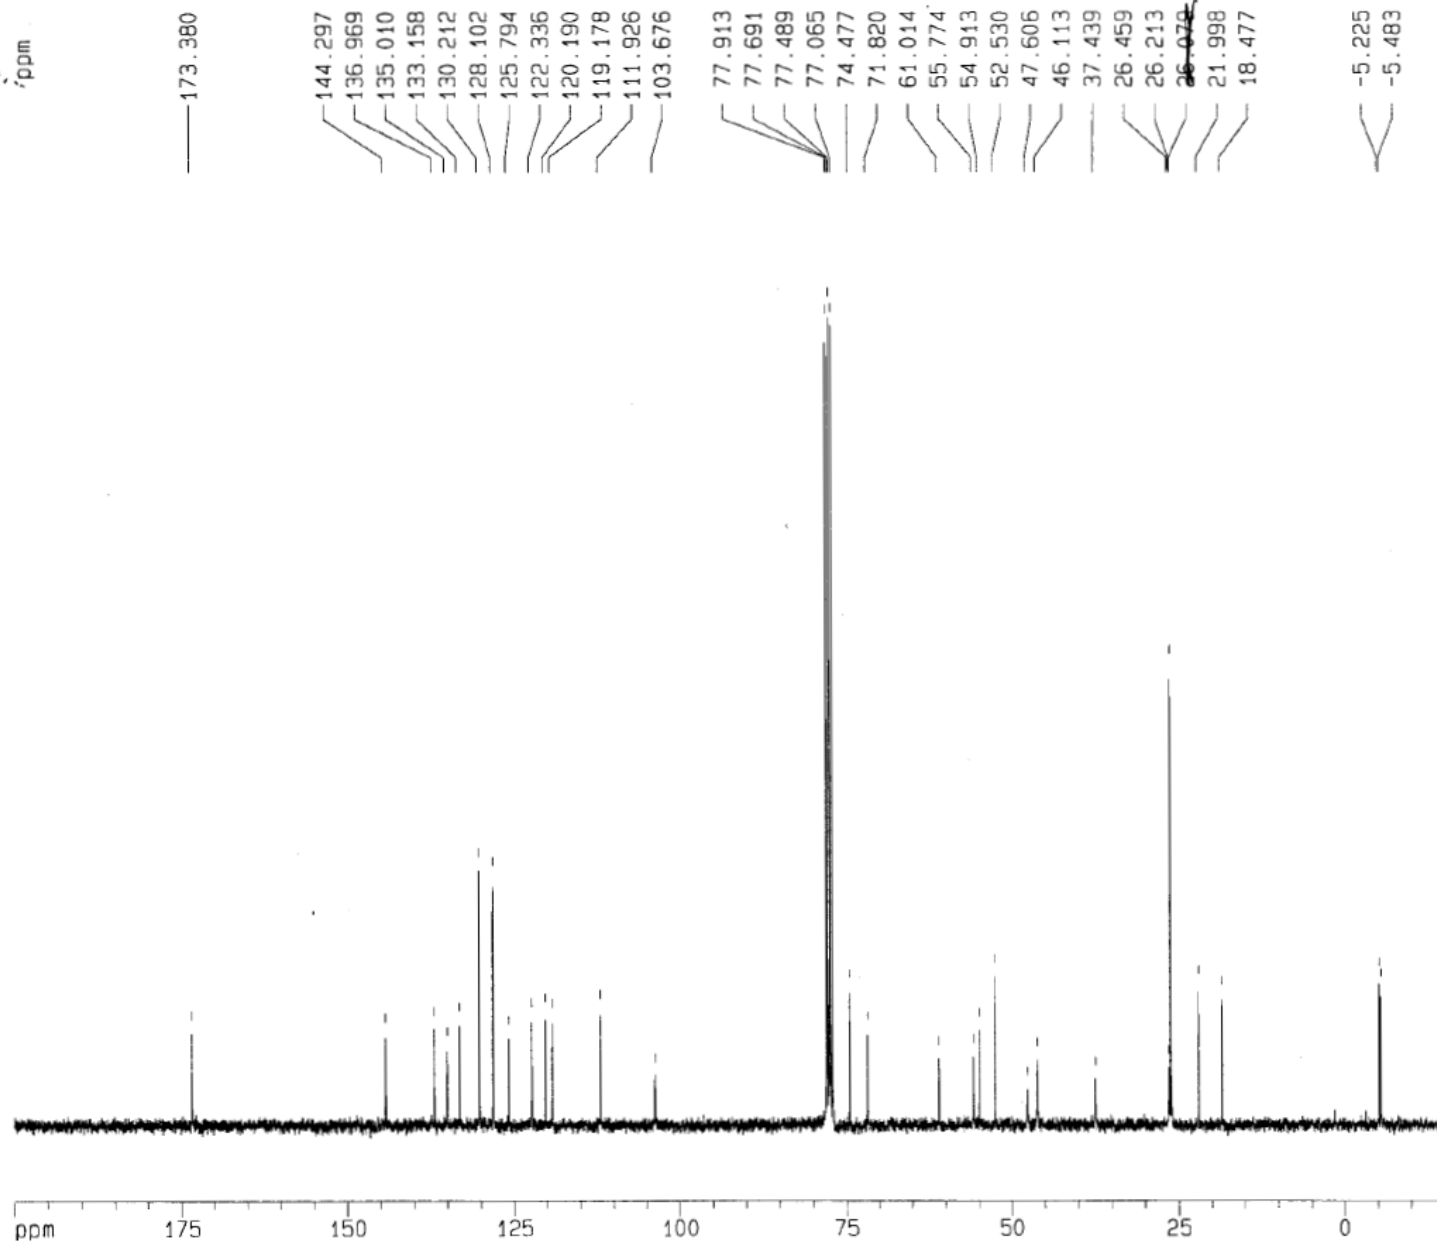

Current Data Parameters  
 NAME 090612FJII1292  
 EXPNO 2  
 PROCNO 1

F2 - Acquisition Parameters  
 Date\_ 20120906  
 Time 16.43  
 INSTRUM spect  
 PROBHD 5 mm QNP 1H/1  
 PULPROG zgpg30  
 TD 65536  
 SOLVENT CDC13  
 NS 567  
 DS 4  
 SWH 18796.992 Hz  
 FIDRES 0.286819 Hz  
 AQ 1.7433076 sec  
 RG 1024  
 DW 26.600 usec  
 DE 6.00 usec  
 TE 300.0 K  
 D1 2.0000000 sec  
 D11 0.0300000 sec  
 D12 0.0002000 sec

===== CHANNEL f1 =====  
 NUC1 13C  
 P1 5.25 usec  
 PL1 -6.00 dB  
 SFO1 75.4106357 MHz

===== CHANNEL f2 =====  
 CPDPRG2 waltz16  
 NUC2 1H  
 PCPD2 115.00 usec  
 PL2 0.00 dB  
 PL12 19.70 dB  
 PL13 19.70 dB  
 SFO2 299.8711995 MHz

F2 - Processing parameters  
 SI 32768  
 SF 75.4023410 MHz  
 WDW EM  
 SSB 0  
 LB 1.00 Hz  
 GB 0  
 PC 1.40

1D NMR plot parameters  
 CX 20.00 cm  
 F1P 200.000 ppm  
 F1 15080.47 Hz  
 F2P -30.000 ppm  
 F2 -2262.07 Hz  
 PPMCM 11.50000 ppm/cm  
 HZCM 867.12695 Hz/cm

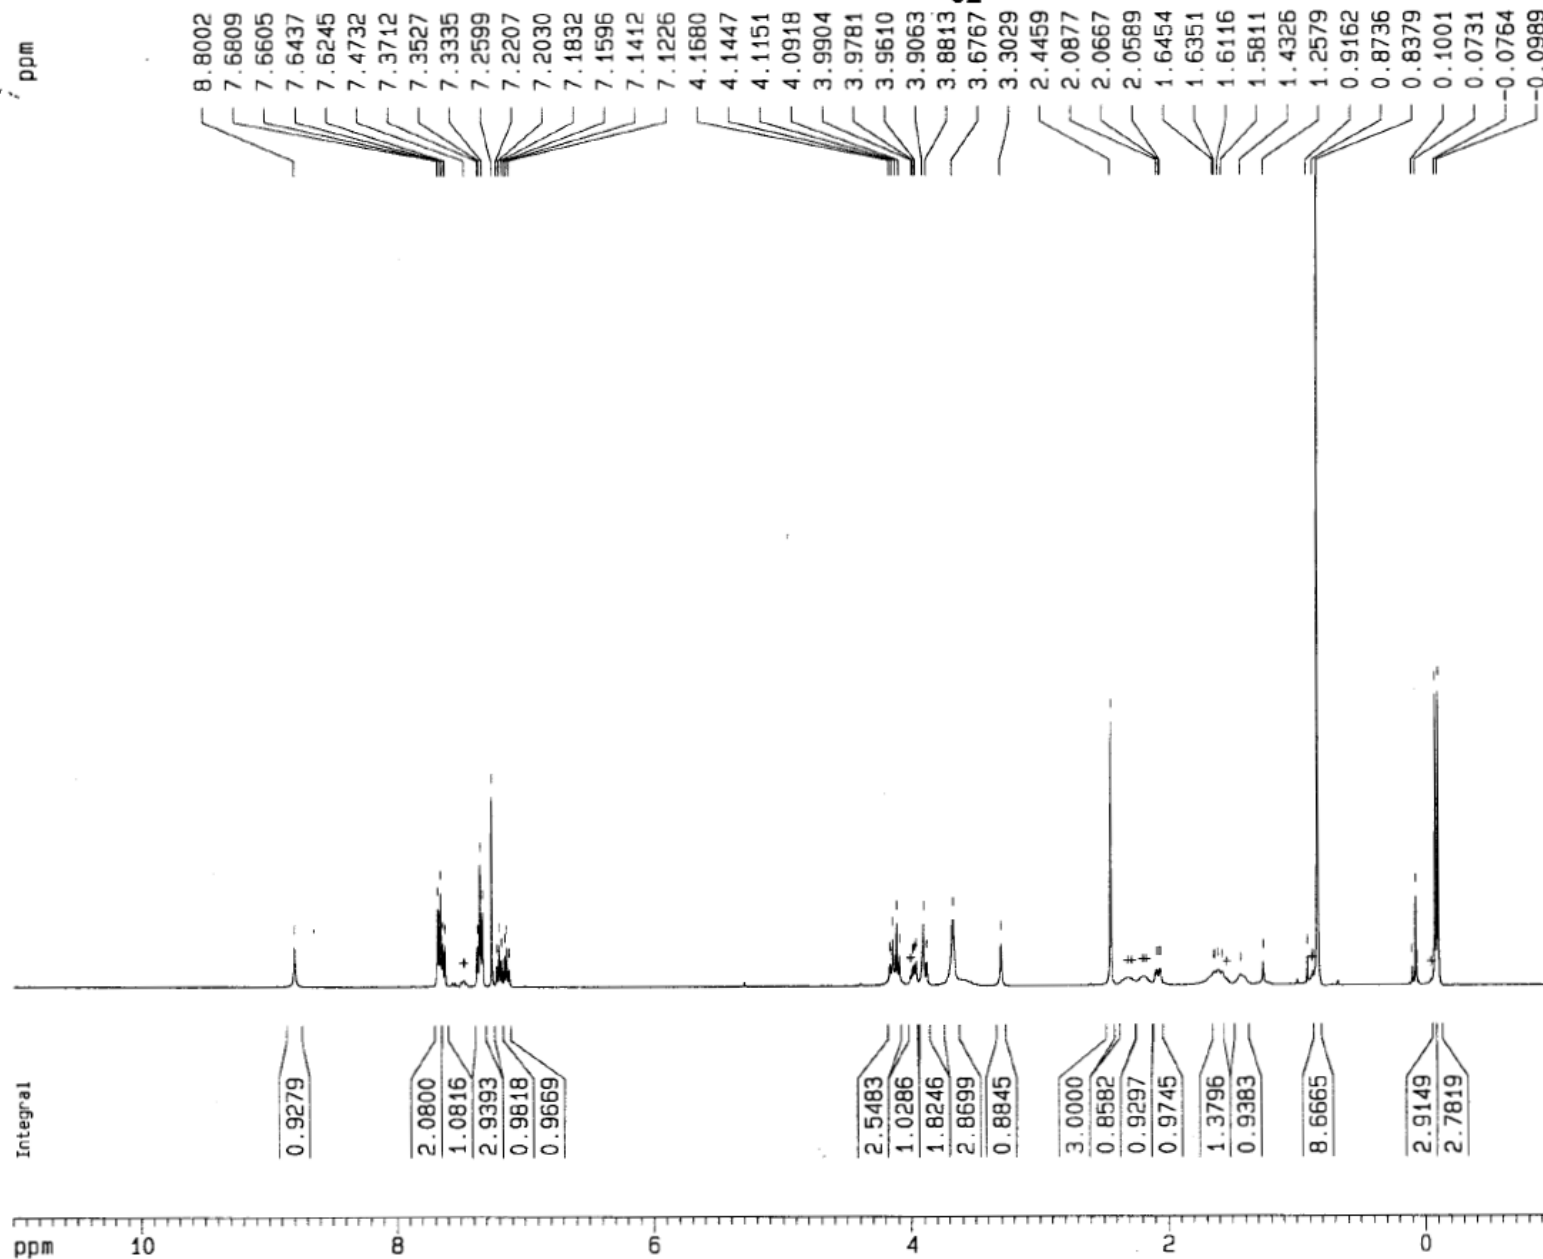

Current Data Parameters  
 NAME 090712FJIII294  
 EXPNO 1  
 PROCNO 1

F2 - Acquisition Parameters  
 Date\_ 20120907  
 Time 19.09  
 INSTRUM spect  
 PROBHD 5 mm BBI 1H-  
 PULPROG zg30  
 TD 65536  
 SOLVENT CDCl3  
 NS 8  
 DS 2  
 SWH 8278.146 Hz  
 FIDRES 0.126314 Hz  
 AQ 3.9584243 sec  
 RG 574.7  
 DW 60.400 usec  
 DE 6.00 usec  
 TE 300.0 K  
 D1 1.00000000 sec

----- CHANNEL f1 -----  
 NUC1 1H  
 P1 6.45 usec  
 PL1 0.00 dB  
 SF01 400.1324710 MHz

F2 - Processing parameters  
 SI 32768  
 SF 400.1300091 MHz  
 WDW EM  
 SSB 0  
 LB 0.30 Hz  
 GB 0  
 PC 1.00

1D NMR plot parameters  
 CX 20.00 cm  
 F1P 11.000 ppm  
 F1 4401.43 Hz  
 F2P -1.000 ppm  
 F2 -400.13 Hz  
 PPMCM 0.60000 ppm/cm  
 HZCM 240.07800 Hz/cm

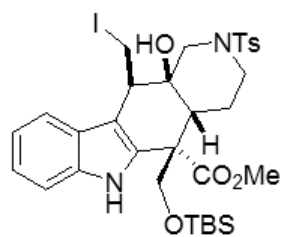

62

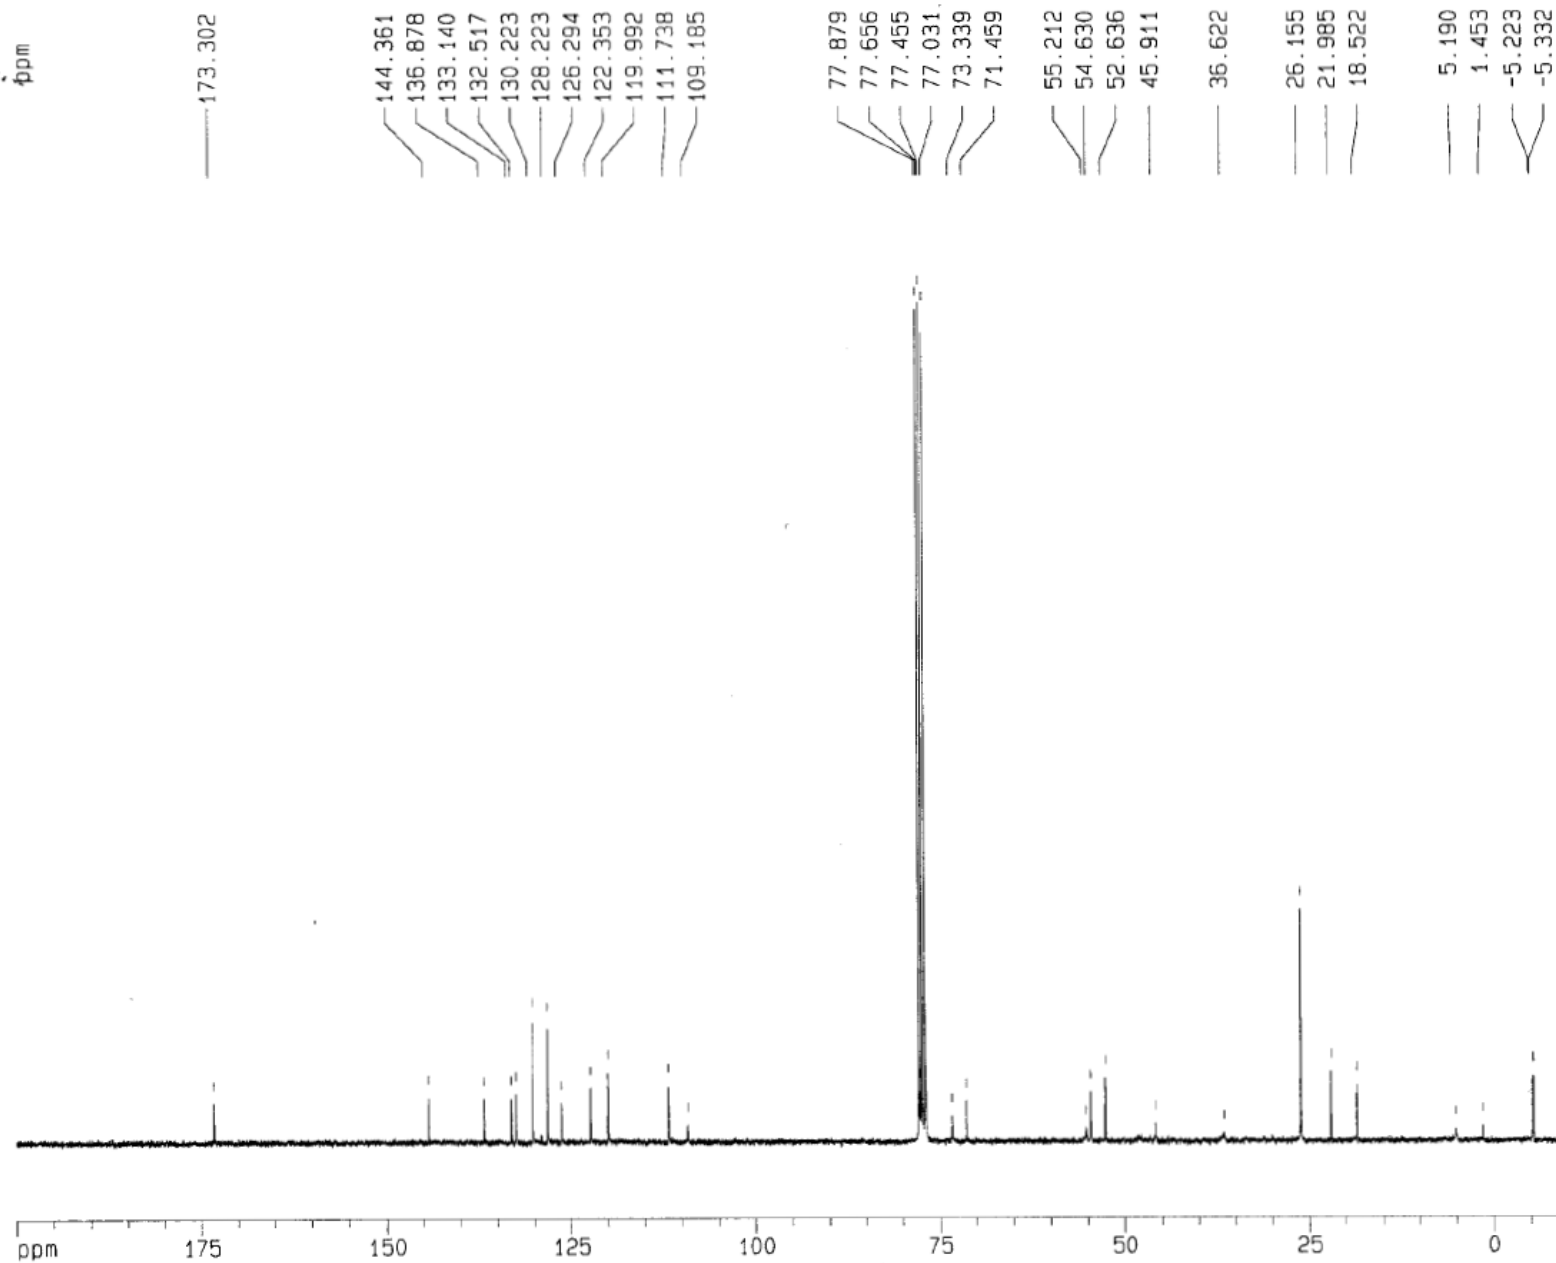

Current Data Parameters  
 NAME 090812FJII1294  
 EXPNO 2  
 PROCNO 1

F2 - Acquisition Parameters  
 Date\_ 20120908  
 Time 14.13  
 INSTRUM spect  
 PROBHD 5 mm GNP 1H/1  
 PULPROG zgpg30  
 TD 65536  
 SOLVENT CDCl3  
 NS 2848  
 DS 4  
 SMH 18796.992 Hz  
 FIDRES 0.286819 Hz  
 AQ 1.7433076 sec  
 RG 1625.5  
 DW 26.600 usec  
 DE 6.00 usec  
 TE 300.0 K  
 D1 2.0000000 sec  
 D11 0.0300000 sec  
 D12 0.0002000 sec

===== CHANNEL f1 =====  
 NUC1 13C  
 P1 5.25 usec  
 PL1 -6.00 dB  
 SF01 75.4106357 MHz

===== CHANNEL f2 =====  
 CPDPRG2 waltz16  
 NUC2 1H  
 PCPD2 115.00 usec  
 PL2 0.00 dB  
 PL12 19.70 dB  
 PL13 19.70 dB  
 SF02 299.8711995 MHz

F2 - Processing parameters  
 SI 32768  
 SF 75.4023410 MHz  
 WDW EM  
 SSB 0  
 LB 1.00 Hz  
 GB 0  
 PC 1.40

1D NMR plot parameters  
 CX 20.00 cm  
 F1P 200.000 ppm  
 F1 15080.47 Hz  
 F2P -10.000 ppm  
 F2 -754.02 Hz  
 PPMCM 10.50000 ppm/cm  
 HZCM 791.72461 Hz/cm

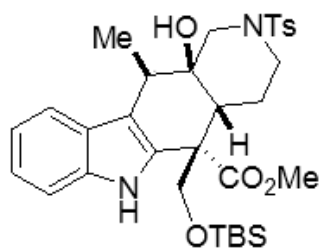

63

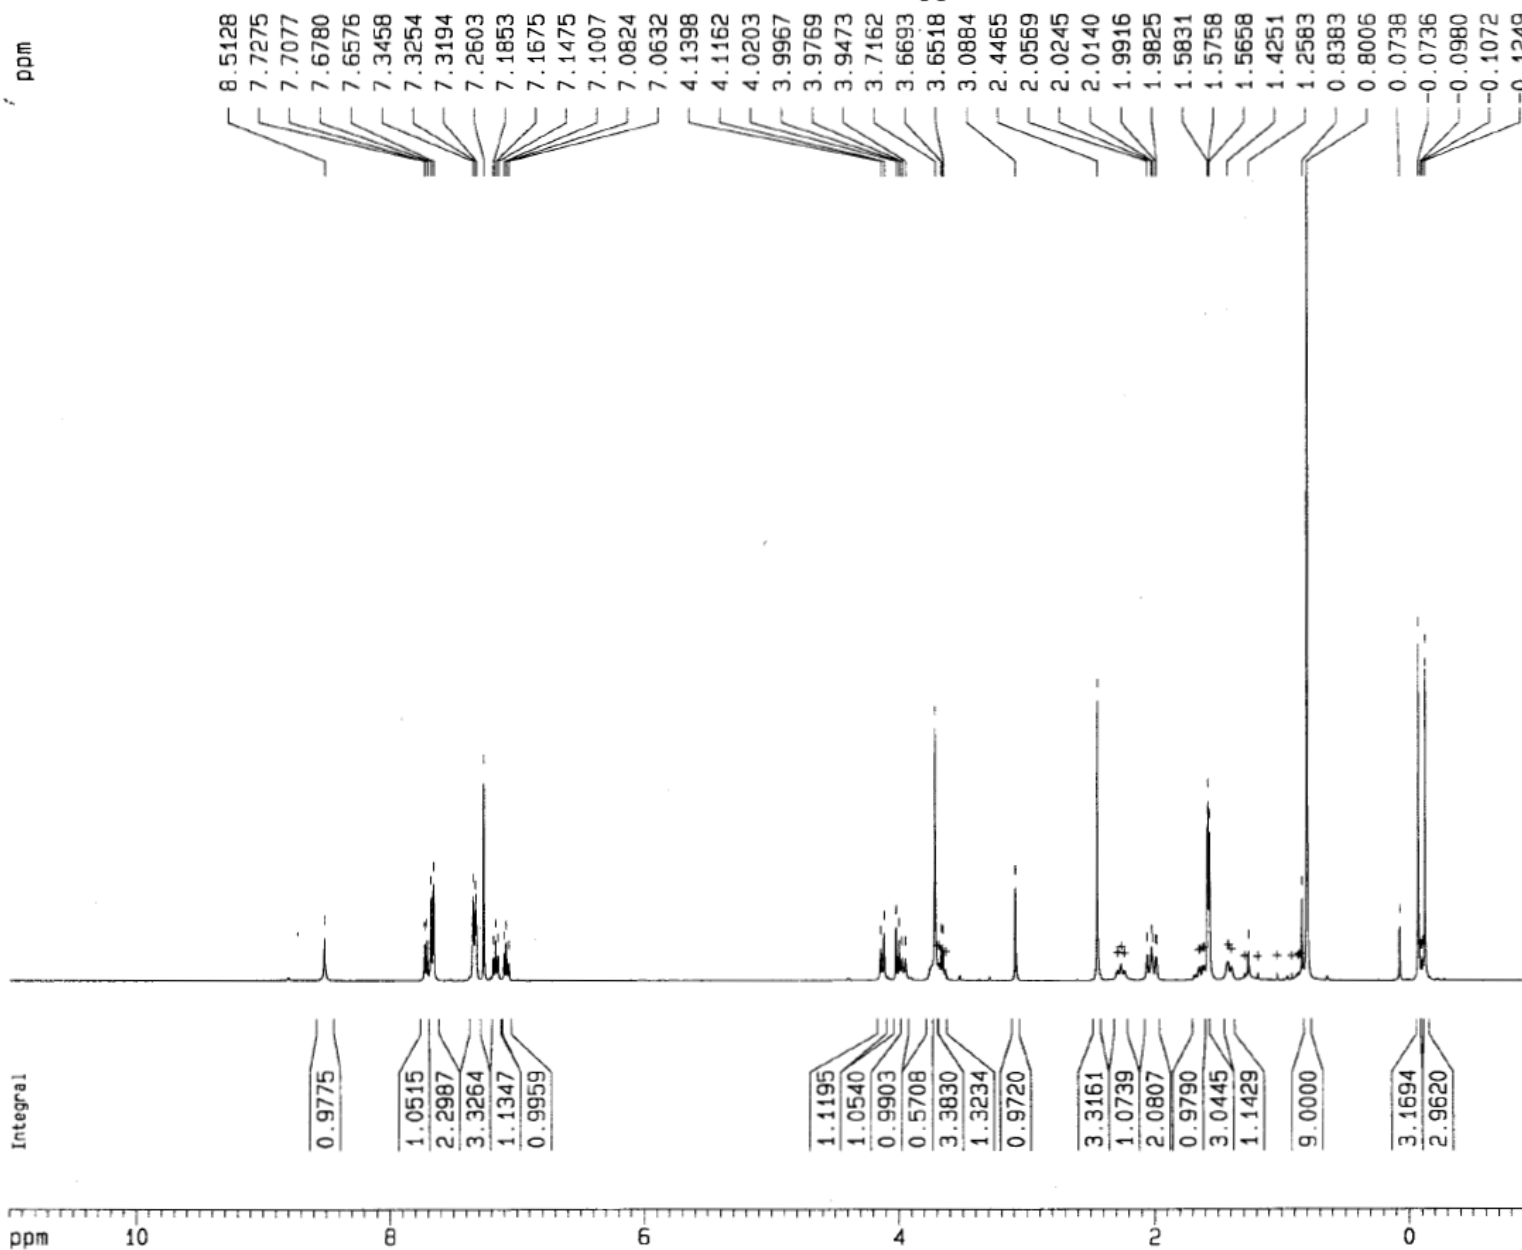

Current Data Parameters  
NAME 090912FJIII296  
EXPNO 1  
PROCNO 1

F2 - Acquisition Parameters  
Date\_ 20120909  
Time 22.57  
INSTRUM spect  
PROBHD 5 mm BBI 1H-  
PULPROG zg30  
TD 65536  
SOLVENT CDCl3  
NS 16  
DS 2  
SWH 8278.146 Hz  
FIDRES 0.126314 Hz  
AQ 3.9584243 sec  
RG 724.1  
DW 60.400 usec  
DE 6.00 usec  
TE 300.0 K  
D1 1.00000000 sec

===== CHANNEL f1 =====  
NUC1 1H  
P1 6.45 usec  
PL1 0.00 dB  
SF01 400.1324710 MHz

F2 - Processing parameters  
SI 32768  
SF 400.1300091 MHz  
WDW EM  
SSB 0  
LB 0.30 Hz  
GB 0  
PC 1.00

1D NMR plot parameters  
CX 20.00 cm  
F1P 11.000 ppm  
F1 4401.43 Hz  
F2P -1.000 ppm  
F2 -400.13 Hz  
PPMCM 0.60000 ppm/cm  
HZCM 240.07800 Hz/cm

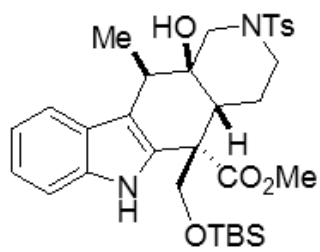**63**

Current Data Parameters  
NAME 090912FJ111296  
EXPNO 1

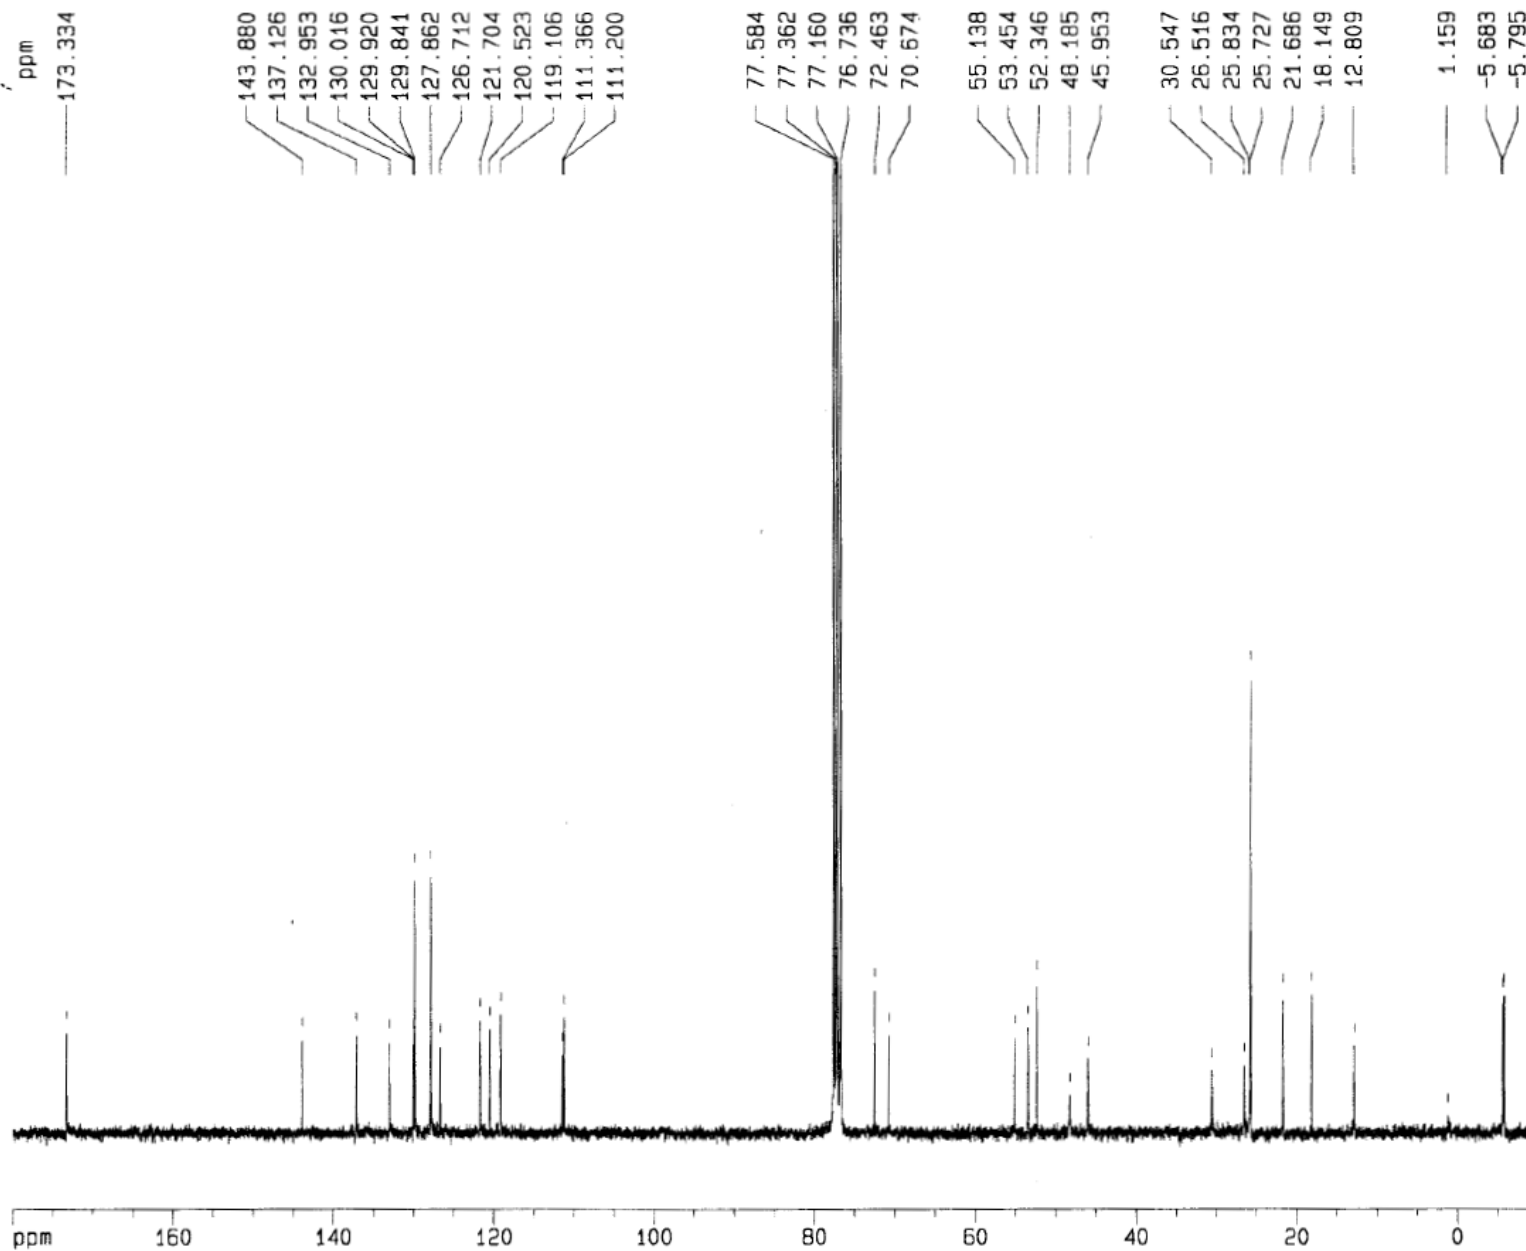

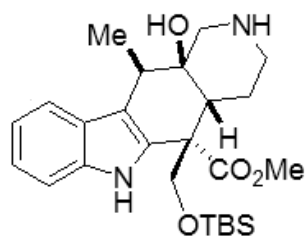

64

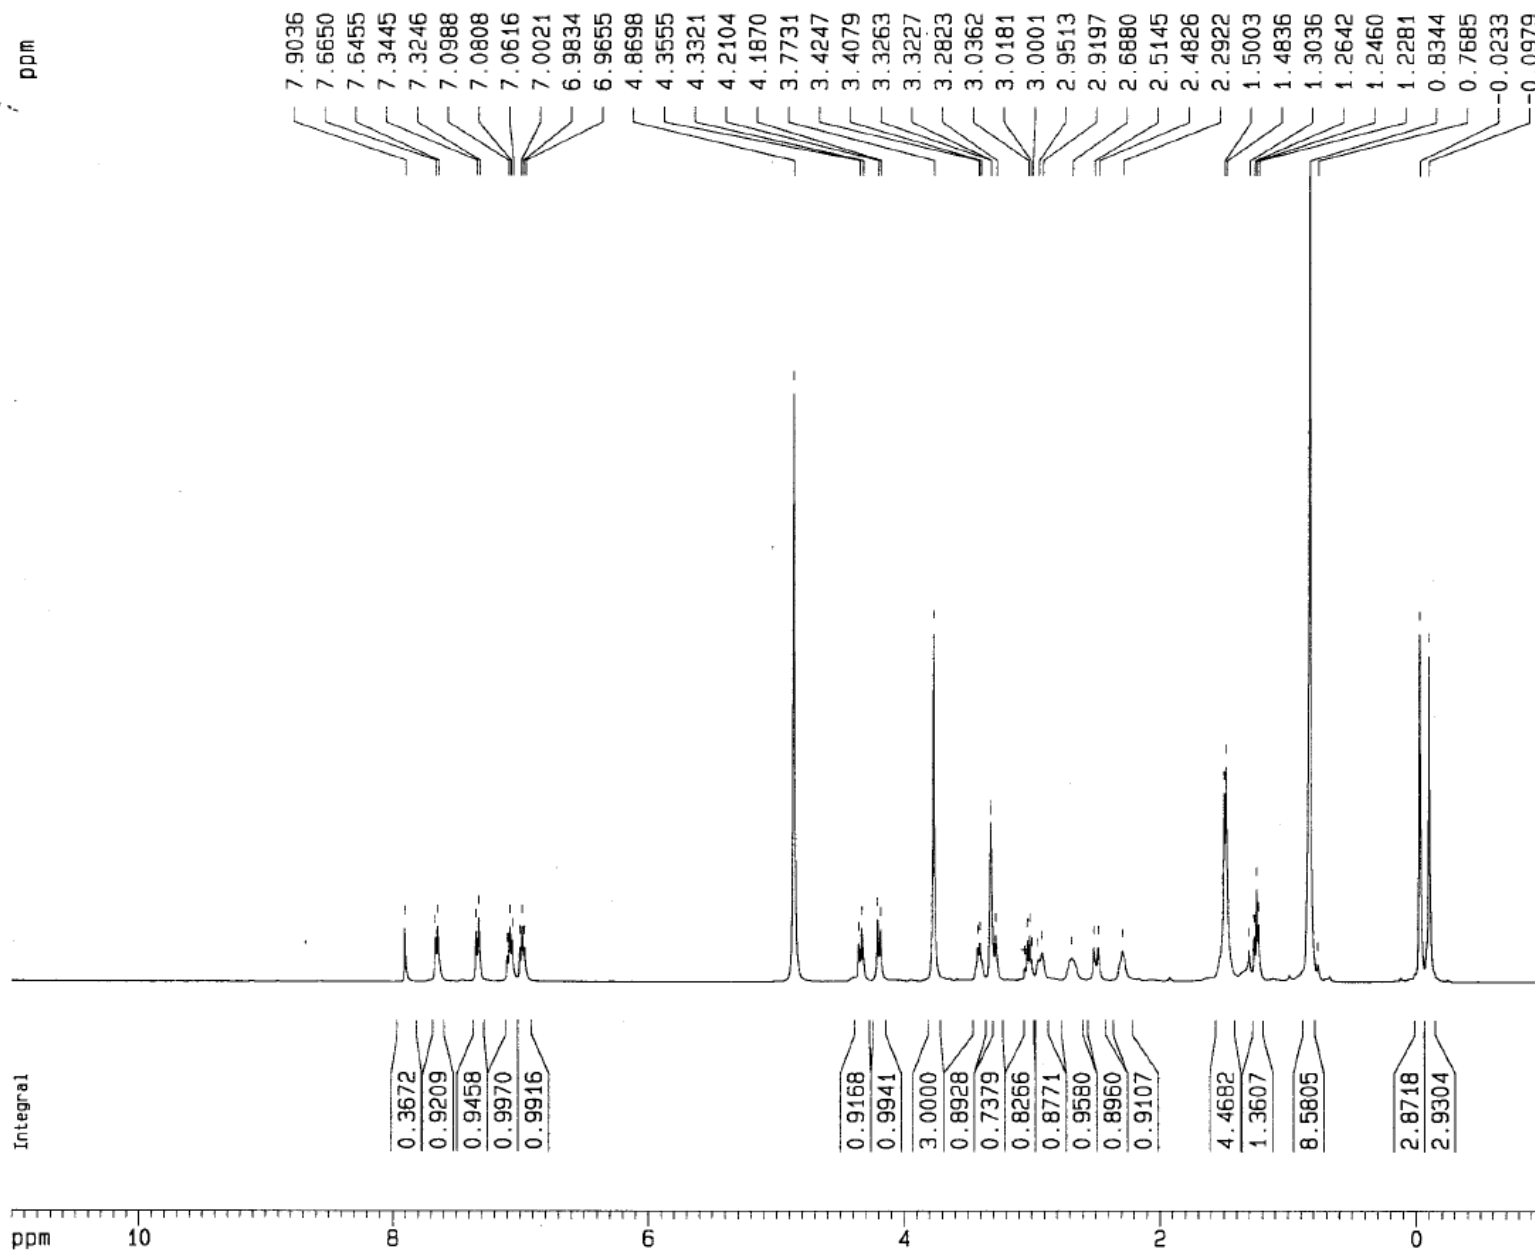

Current Data Parameters  
 NAME 091212FJIII299  
 EXPNO 3  
 PROCNO 1

F2 - Acquisition Parameters  
 Date\_ 20120912  
 Time 20.11  
 INSTRUM spect  
 PROBHD 5 mm BBI 1H-  
 PULPROG zg30  
 TD 65536  
 SOLVENT MeOH  
 NS 16  
 DS 2  
 SWH 8278.146 Hz  
 FIDRES 0.126314 Hz  
 AQ 3.9584243 sec  
 RG 101.6  
 DW 60.400 usec  
 DE 6.00 usec  
 TE 300.0 K  
 D1 1.00000000 sec

===== CHANNEL f1 =====  
 NUC1 1H  
 P1 6.45 usec  
 PL1 0.00 dB  
 SF01 400.1324710 MHz

F2 - Processing parameters  
 SI 32768  
 SF 400.1300009 MHz  
 WDW EM  
 SSB 0  
 LB 0.30 Hz  
 GB 0  
 PC 1.00

1D NMR plot parameters  
 CX 20.00 cm  
 F1P 11.000 ppm  
 F1 4401.43 Hz  
 F2P -1.000 ppm  
 F2 -400.13 Hz  
 PPMCM 0.60000 ppm/cm  
 HZCM 240.07800 Hz/cm

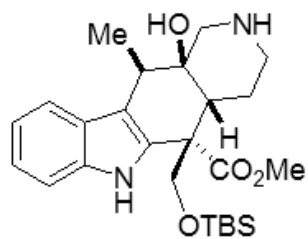

64

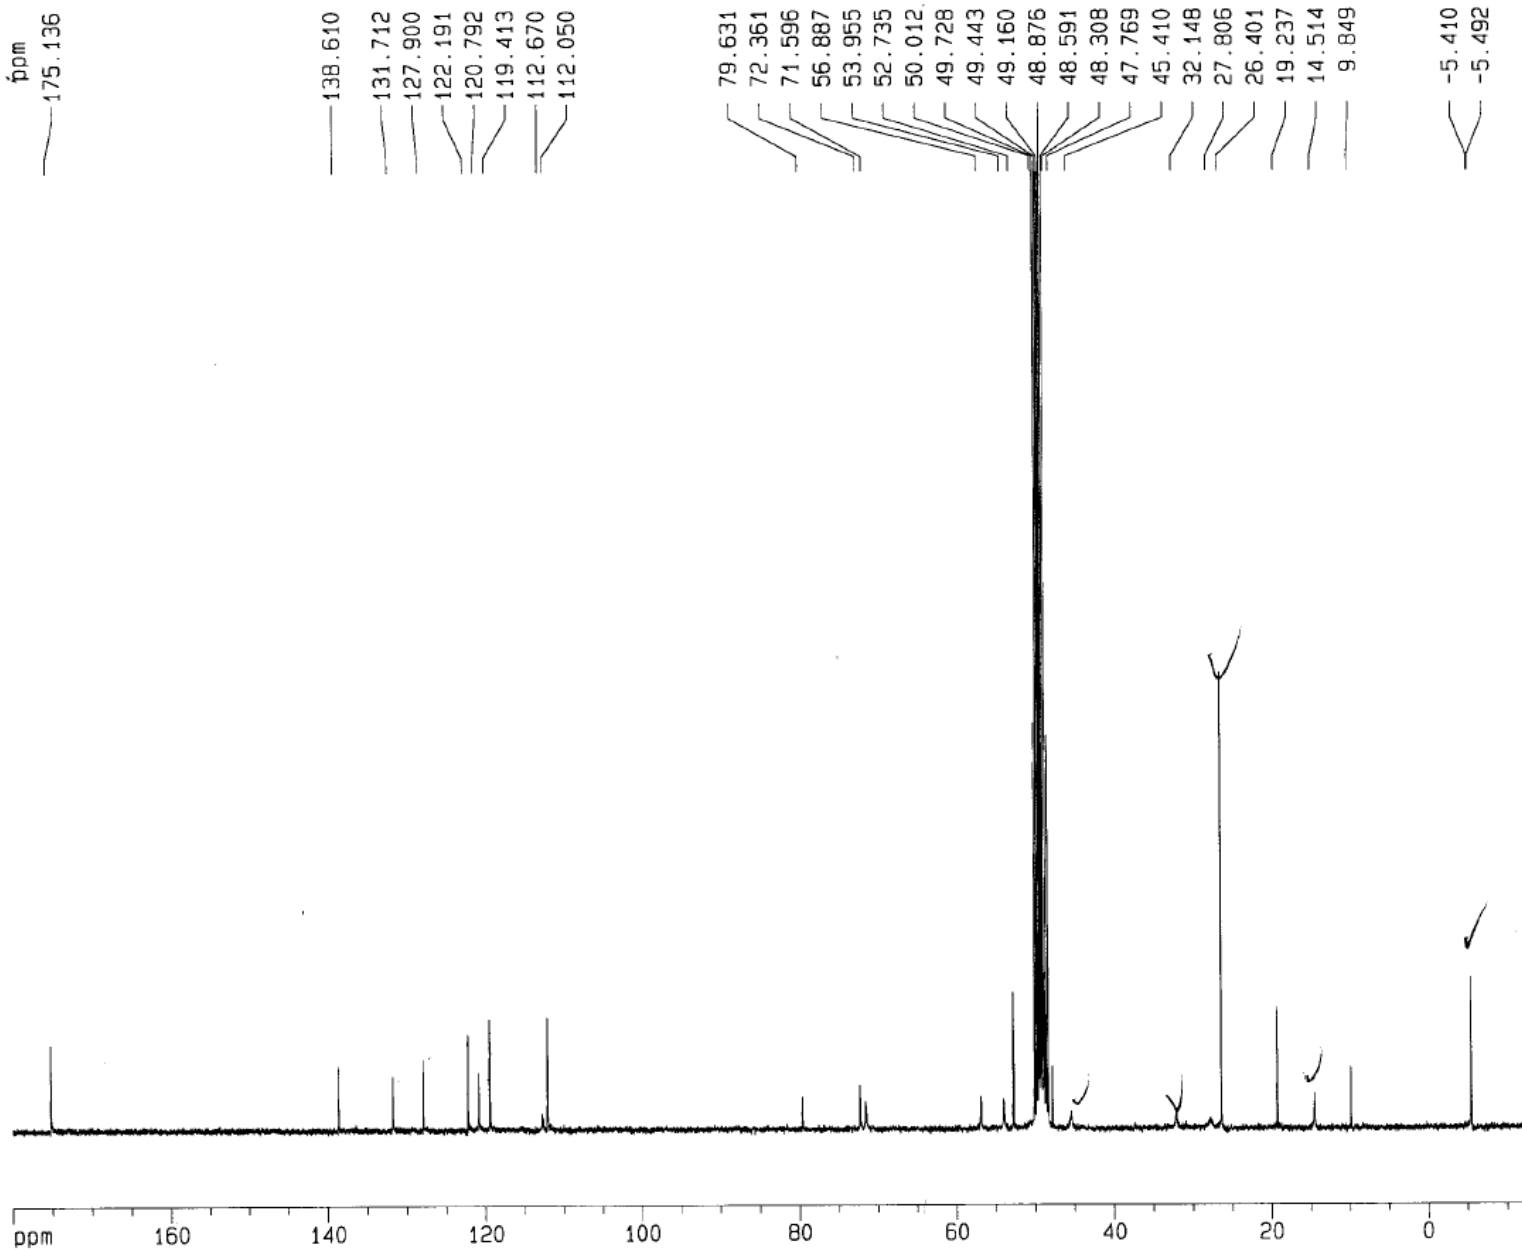

Current Data Parameters  
 NAME 091312FJII299  
 EXPNO 2  
 PROCNO 1

F2 - Acquisition Parameters  
 Date\_ 20120913  
 Time 20.19  
 INSTRUM spect  
 PROBHD 5 mm GNP 1H/1  
 PULPROG zgpg30  
 TD 65536  
 SOLVENT MeOH  
 NS 5720  
 DS 4  
 SWH 18796.992 Hz  
 FIDRES 0.286819 Hz  
 AQ 1.7433076 sec  
 RG 512  
 DW 26.600 usec  
 DE 6.00 usec  
 TE 300.0 K  
 D1 2.00000000 sec  
 D11 0.03000000 sec  
 D12 0.00002000 sec

----- CHANNEL f1 -----  
 NUC1 13C  
 P1 5.25 usec  
 PL1 -6.00 dB  
 SFO1 75.4106357 MHz

----- CHANNEL f2 -----  
 CPDPRG2 waltz16  
 NUC2 1H  
 PCPD2 115.00 usec  
 PL2 0.00 dB  
 PL12 19.70 dB  
 PL13 19.70 dB  
 SFO2 299.8711995 MHz

F2 - Processing parameters  
 SI 32768  
 SF 75.4022561 MHz  
 HDW EM  
 SSB 0  
 LB 1.00 Hz  
 GB 0  
 PC 1.40

1D NMR plot parameters  
 CX 20.00 cm  
 F1P 180.000 ppm  
 F1 13572.41 Hz  
 F2P -15.000 ppm  
 F2 -1131.03 Hz  
 PPMCM 9.75000 ppm/cm  
 HZCM 735.17212 Hz/cm



FYQ-III-299 NOESY

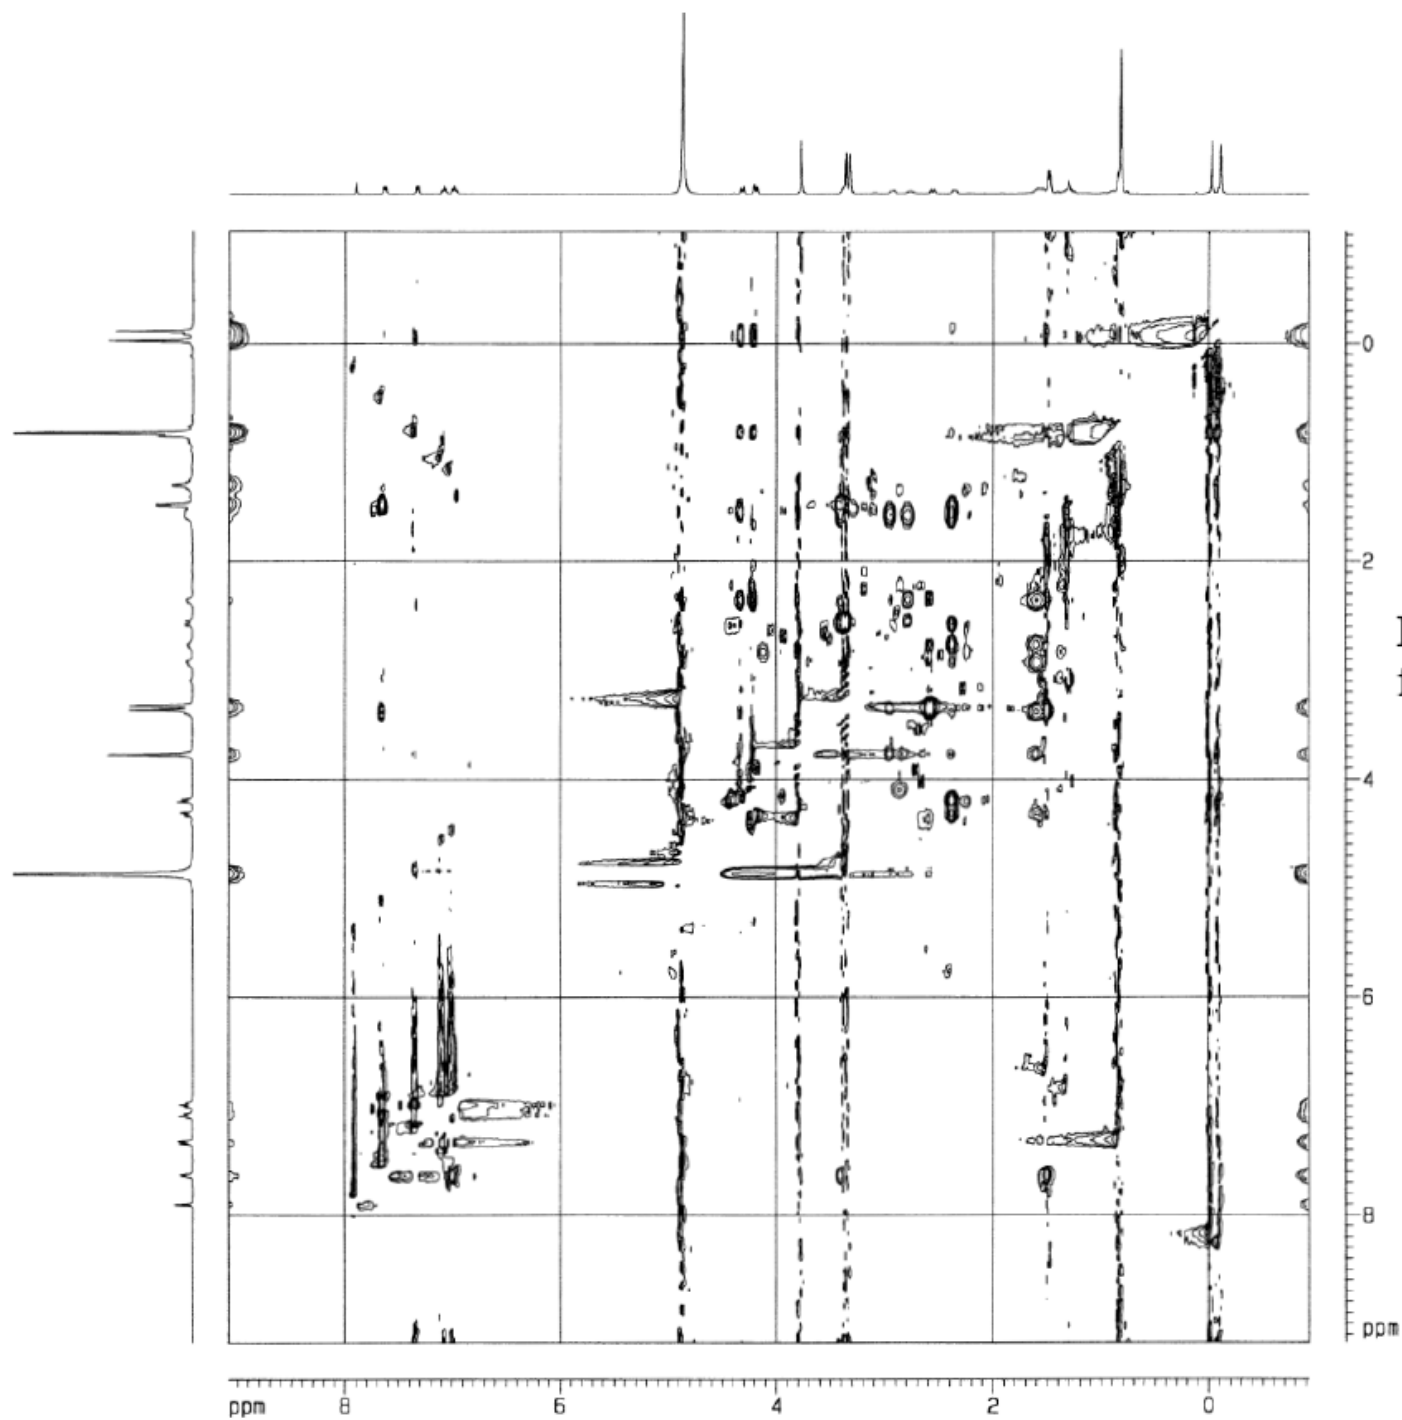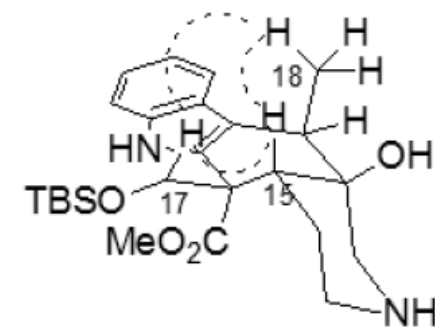

Key nOe correlations  
for piperidine **64**

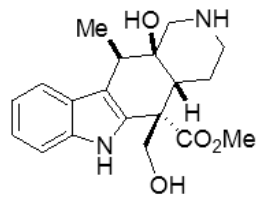

(+)-3

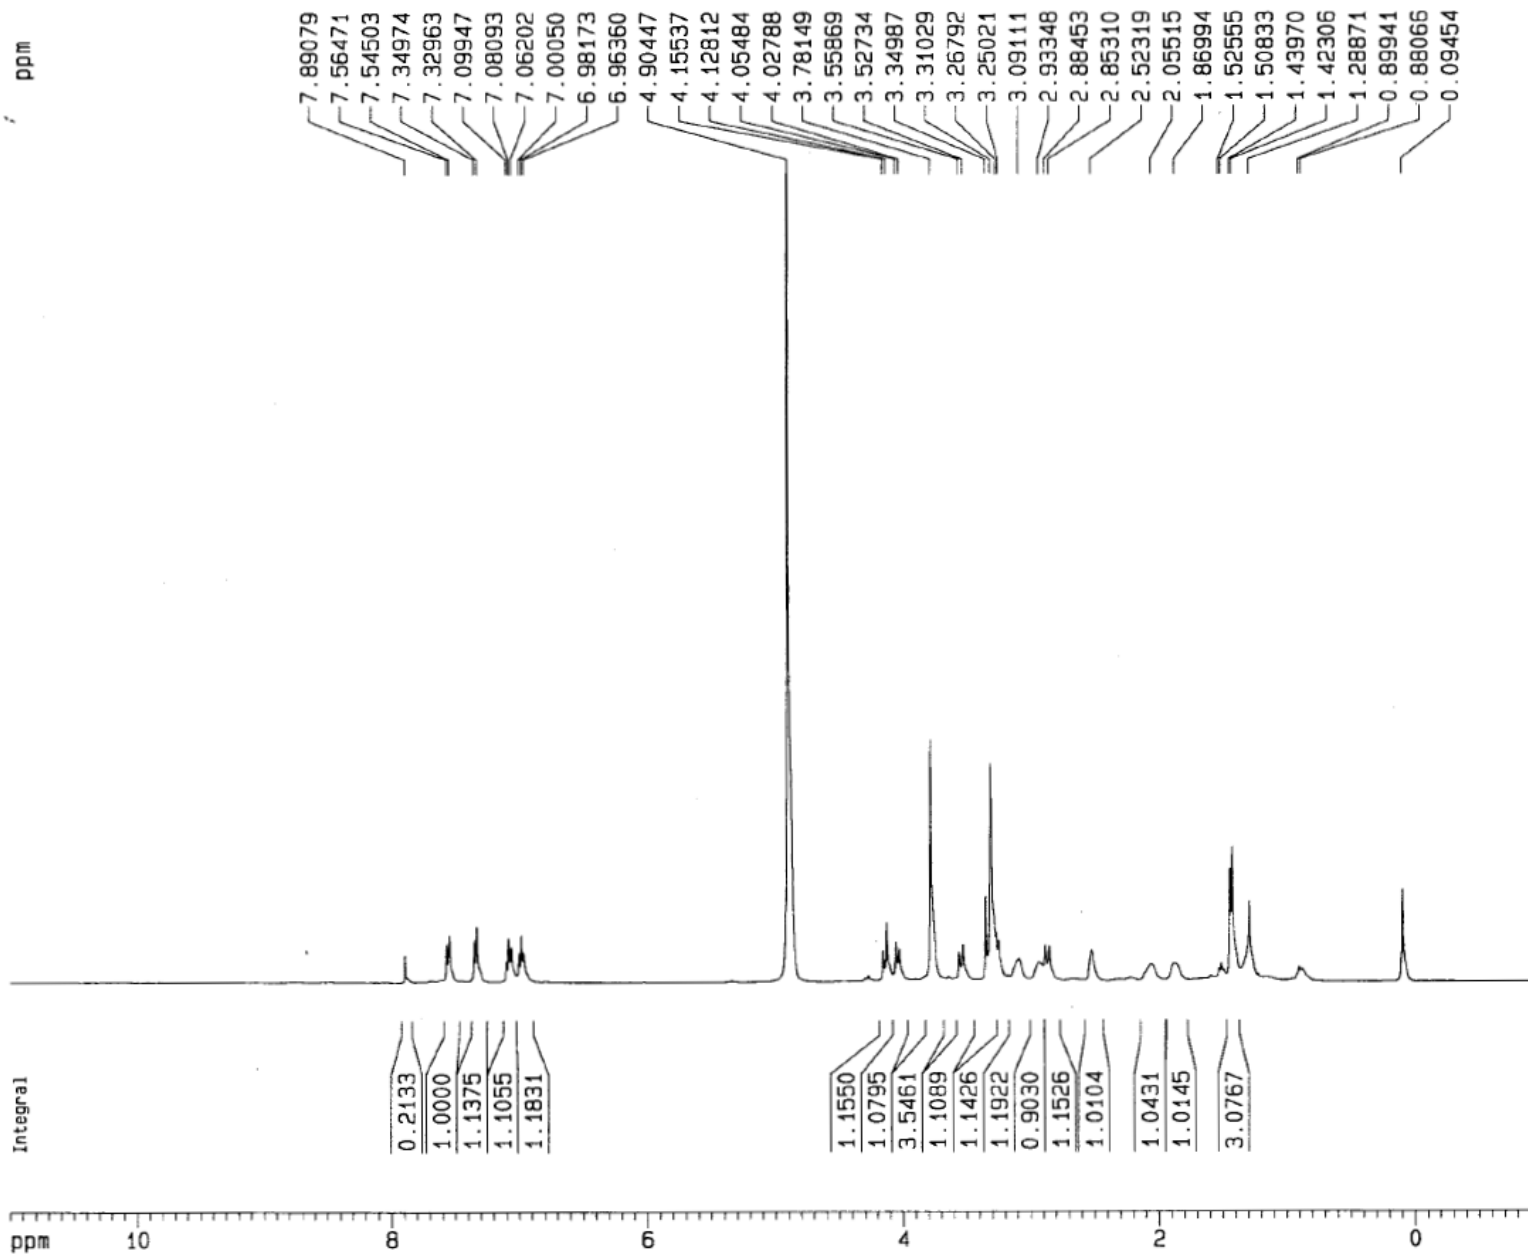

Current Data Parameters  
 NAME 092012FJV015  
 EXPNO 2  
 PROCNO 1

F2 - Acquisition Parameters  
 Date\_ 20120920  
 Time 20.21  
 INSTRUM spect  
 PROBHD 5 mm BBI 1H-  
 PULPROG zg30  
 TD 65536  
 SOLVENT MeOH  
 NS 16  
 DS 2  
 SWH 8278.146 Hz  
 FIDRES 0.126314 Hz  
 AQ 3.9584243 sec  
 RG 143.7  
 DW 60.400 usec  
 DE 6.00 usec  
 TE 300.0 K  
 D1 1.00000000 sec

===== CHANNEL f1 =====  
 NUC1 1H  
 P1 6.45 usec  
 PL1 0.00 dB  
 SF01 400.1324710 MHz

F2 - Processing parameters  
 SI 32768  
 SF 400.1300067 MHz  
 WDW EM  
 SSB 0  
 LB 0.30 Hz  
 GB 0  
 PC 1.00

1D NMR plot parameters  
 CX 20.00 cm  
 F1P 11.000 ppm  
 F1 4401.43 Hz  
 F2P -1.000 ppm  
 F2 -400.13 Hz  
 PPMCM 0.60000 ppm/cm  
 HZCM 240.07800 Hz/cm

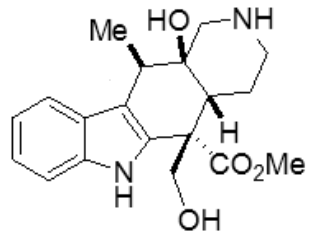

(+)-3

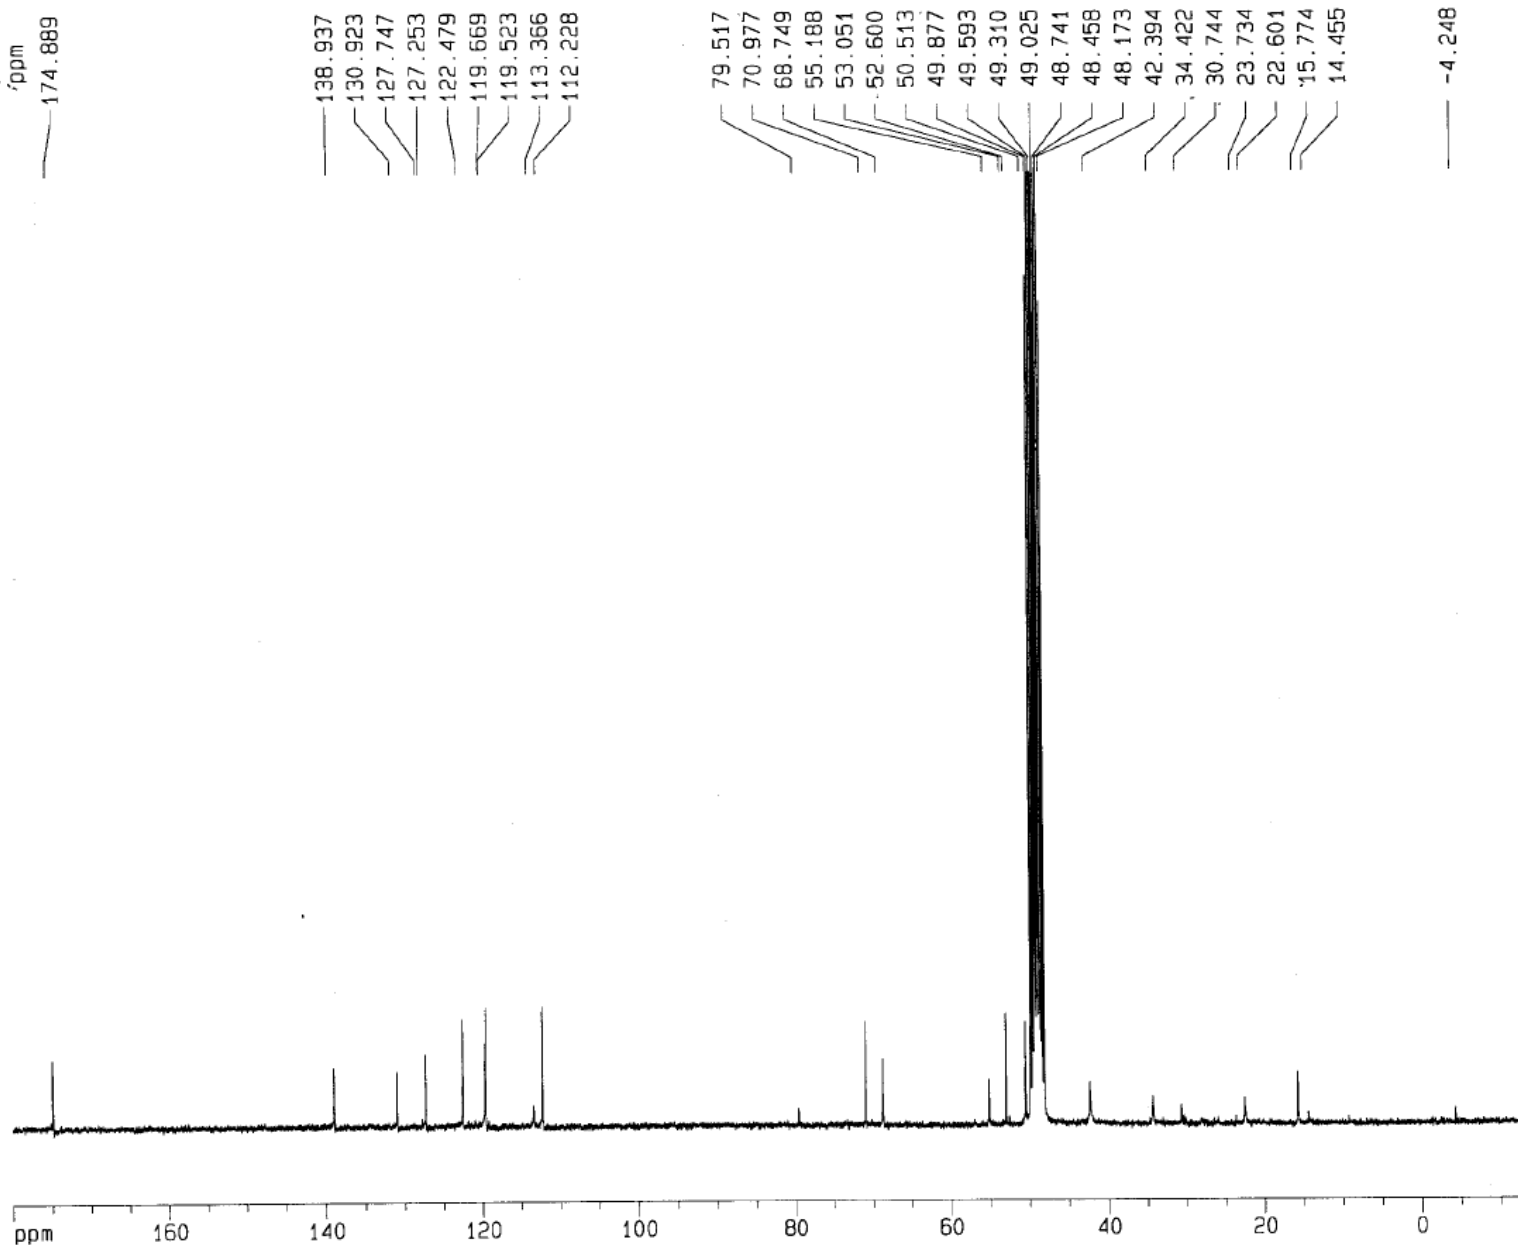

Current Data Parameters  
 NAME 092112FJV015  
 EXPNO 2  
 PROCNO 1

## F2 - Acquisition Parameters

Date\_ 20120922  
 Time 3.55  
 INSTRUM spect  
 PROBHD 5 mm QNP 1H/1  
 PULPROG zgpg30  
 TD 65536  
 SOLVENT MeOH  
 NS 11264  
 DS 4  
 SWH 18796.992 Hz  
 FIDRES 0.286819 Hz  
 AQ 1.7433076 sec  
 RG 8192  
 DW 26.600 usec  
 DE 6.00 usec  
 TE 300.0 K  
 D1 2.00000000 sec  
 D11 0.03000000 sec  
 D12 0.00002000 sec

----- CHANNEL f1 -----  
 NUC1 13C  
 P1 5.25 usec  
 PL1 -6.00 dB  
 SF01 75.4106357 MHz

----- CHANNEL f2 -----  
 CPDPRG2 waltz16  
 NUC2 1H  
 PCPD2 115.00 usec  
 PL2 0.00 dB  
 PL12 19.70 dB  
 PL13 19.70 dB  
 SF02 299.8711995 MHz

## F2 - Processing parameters

SI 32768  
 SF 75.4022676 MHz  
 WDW EM  
 SSB 0  
 LB 1.00 Hz  
 GB 0  
 PC 1.40

1D NMR plot parameters  
 CX 20.00 cm  
 F1P 180.000 ppm  
 F1 13572.41 Hz  
 F2P -15.000 ppm  
 F2 -1131.03 Hz  
 PPMCM 9.75000 ppm/cm  
 HZCM 735.17218 Hz/cm

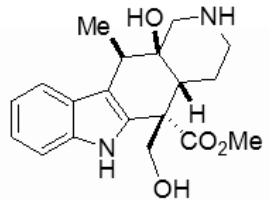**(±)-3**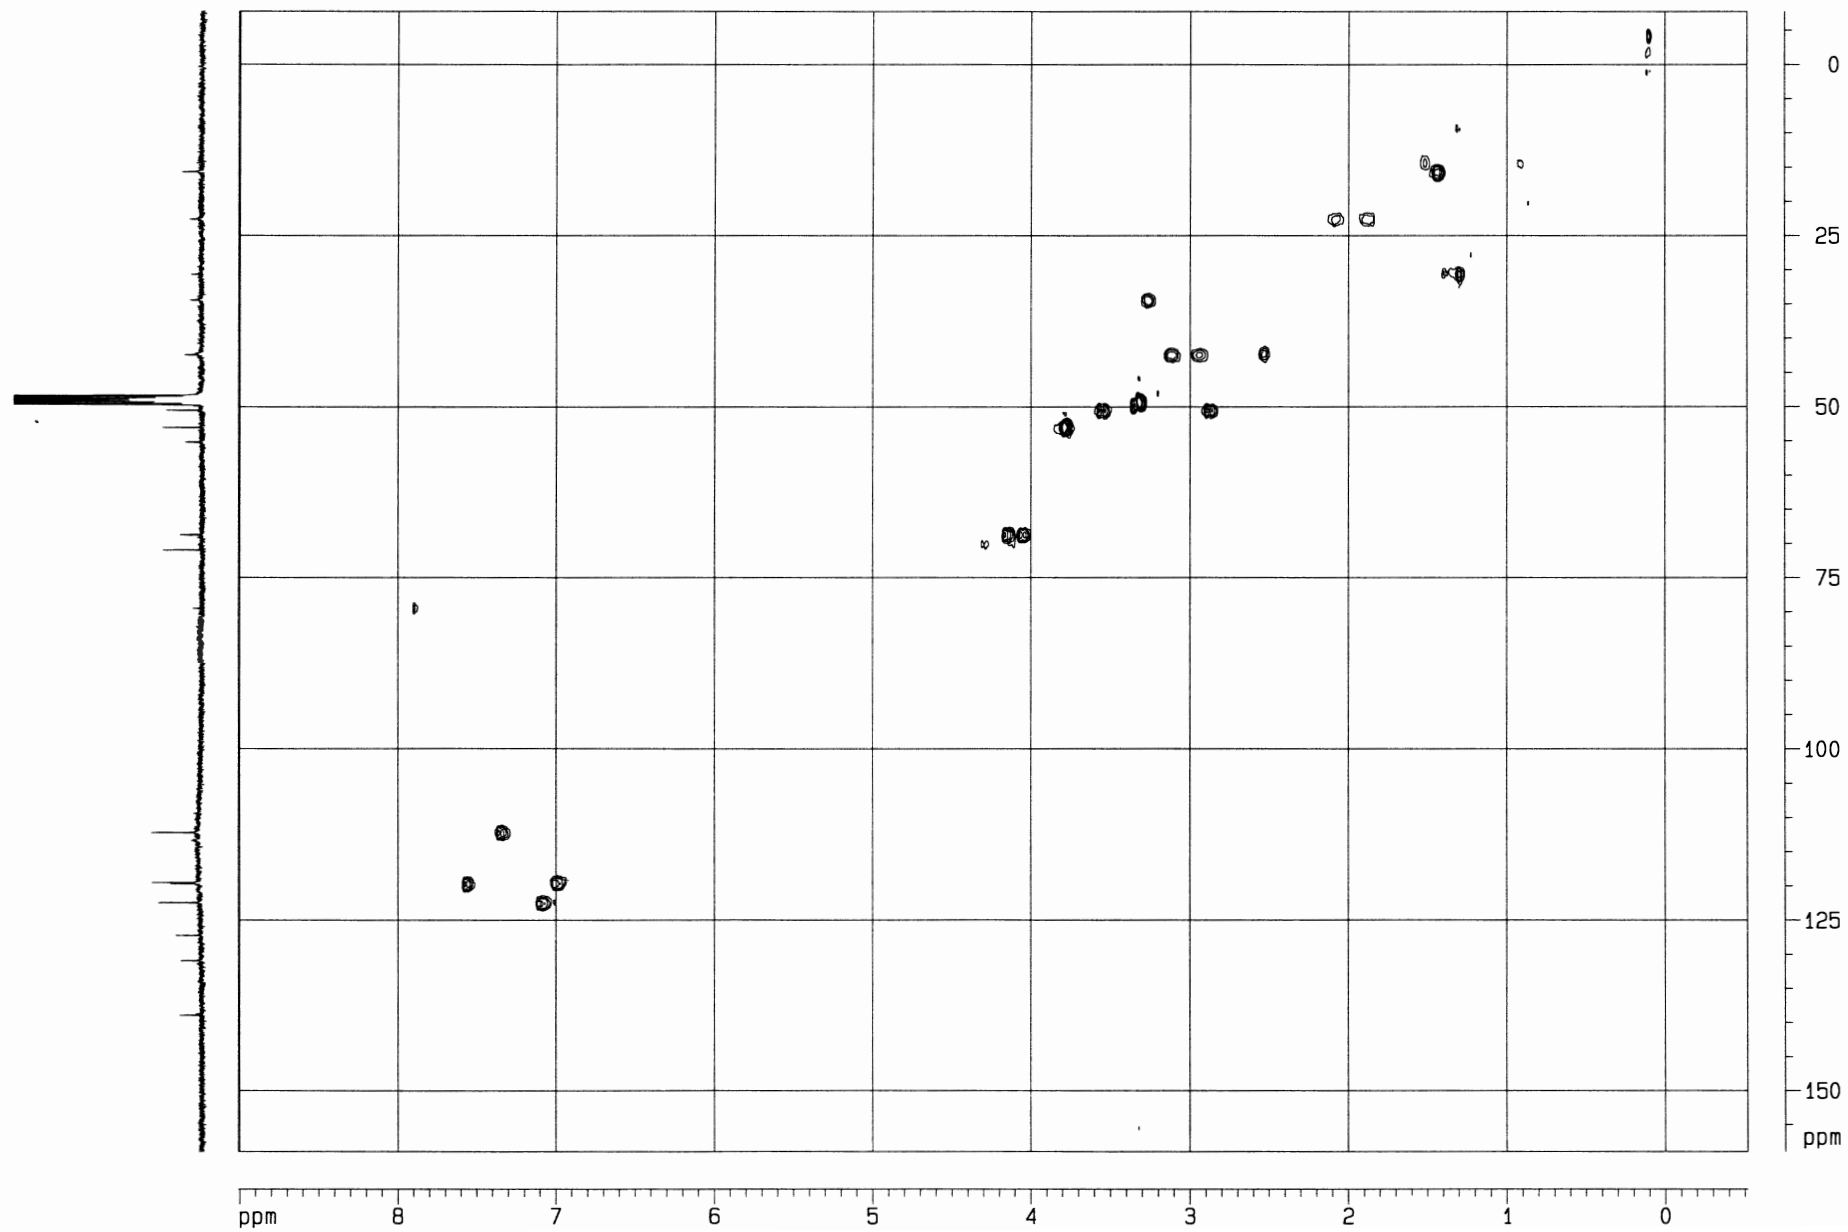

Selected HMBC correlations  
for alstilobanine A ((±)-3)

FYQ-V-015 HMBC d4-MeOD

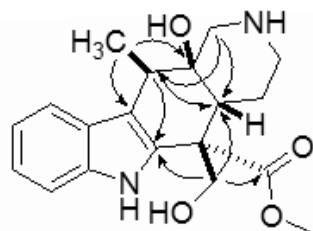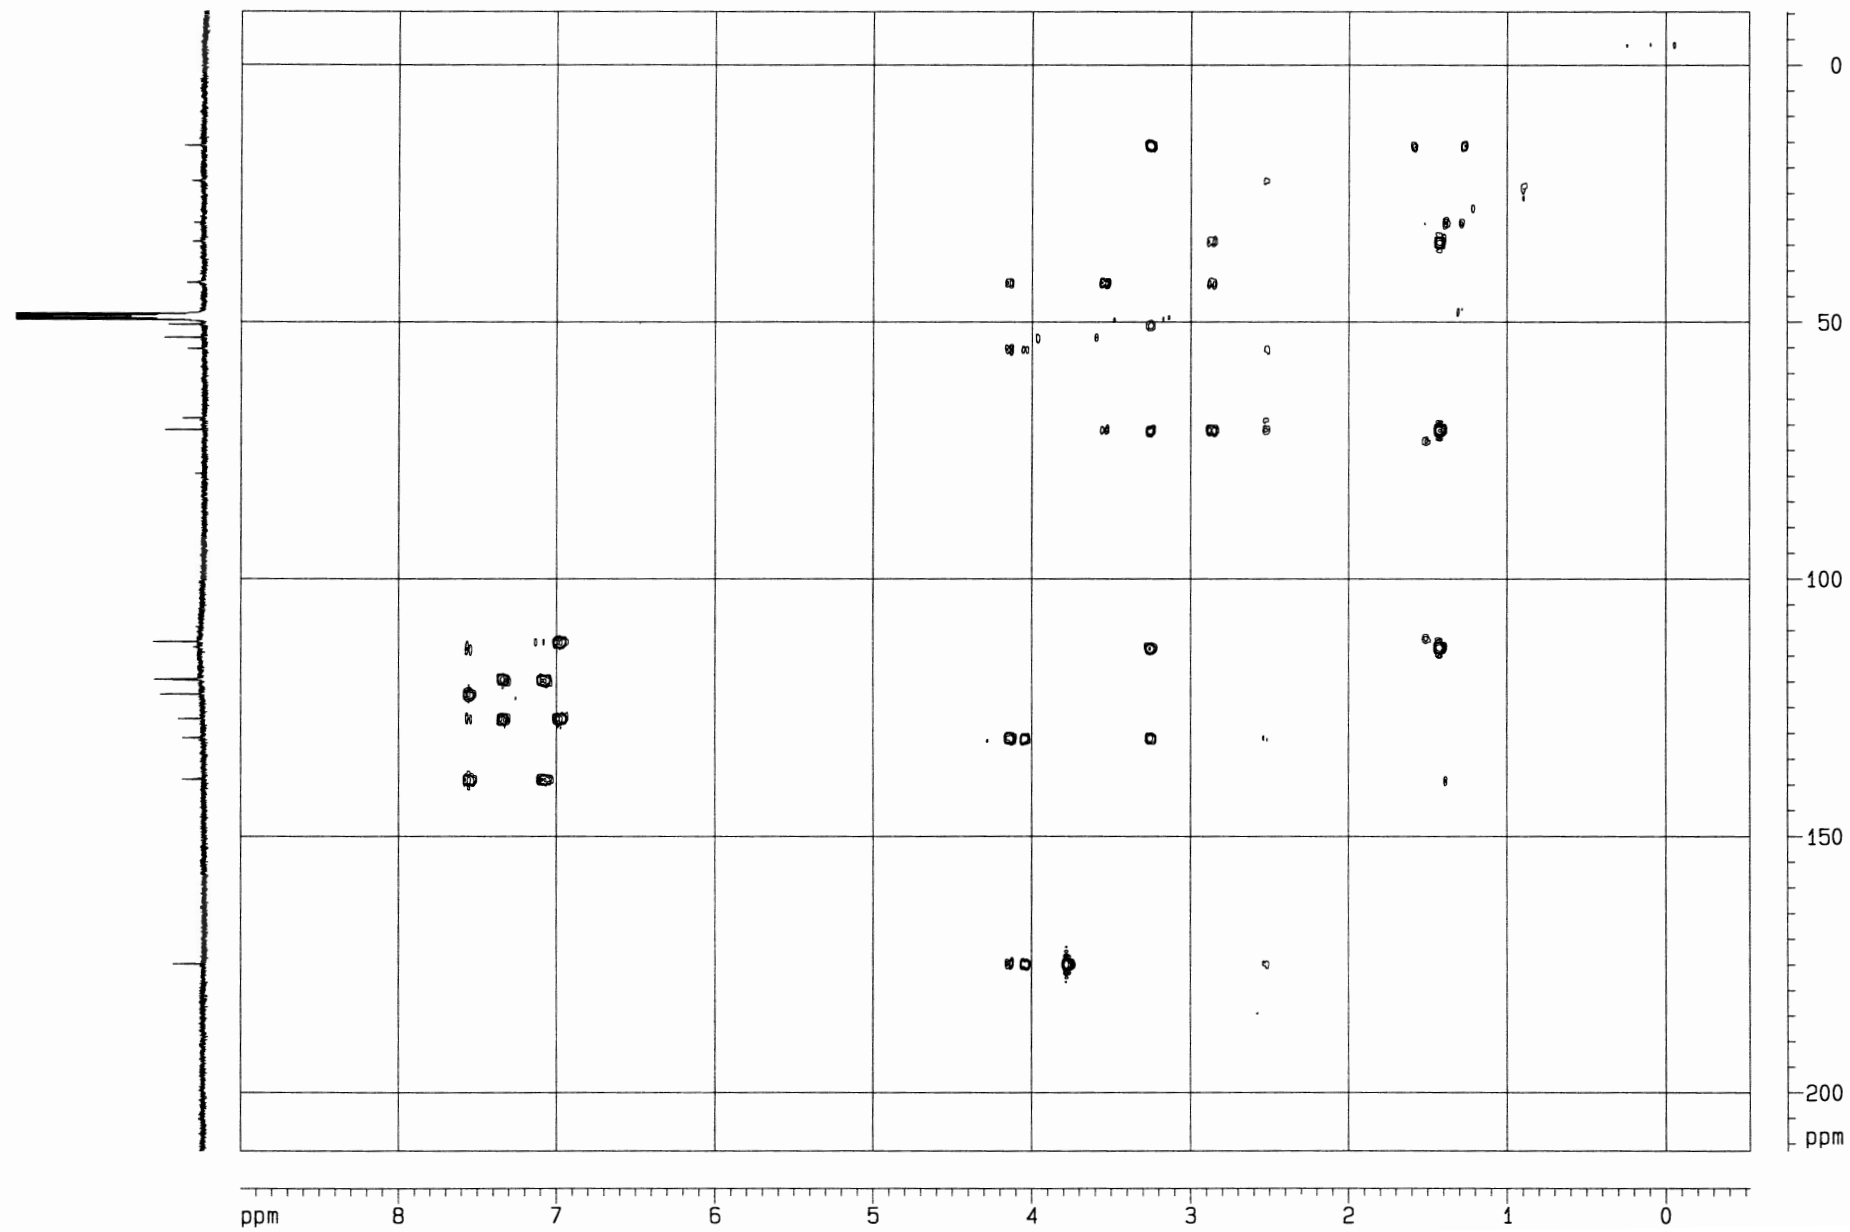

S81

FYQ-V-015 COSY d4-MeOD

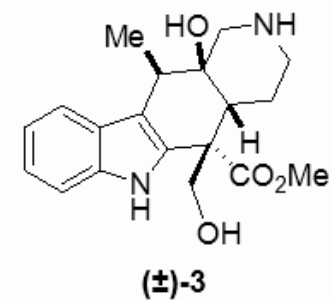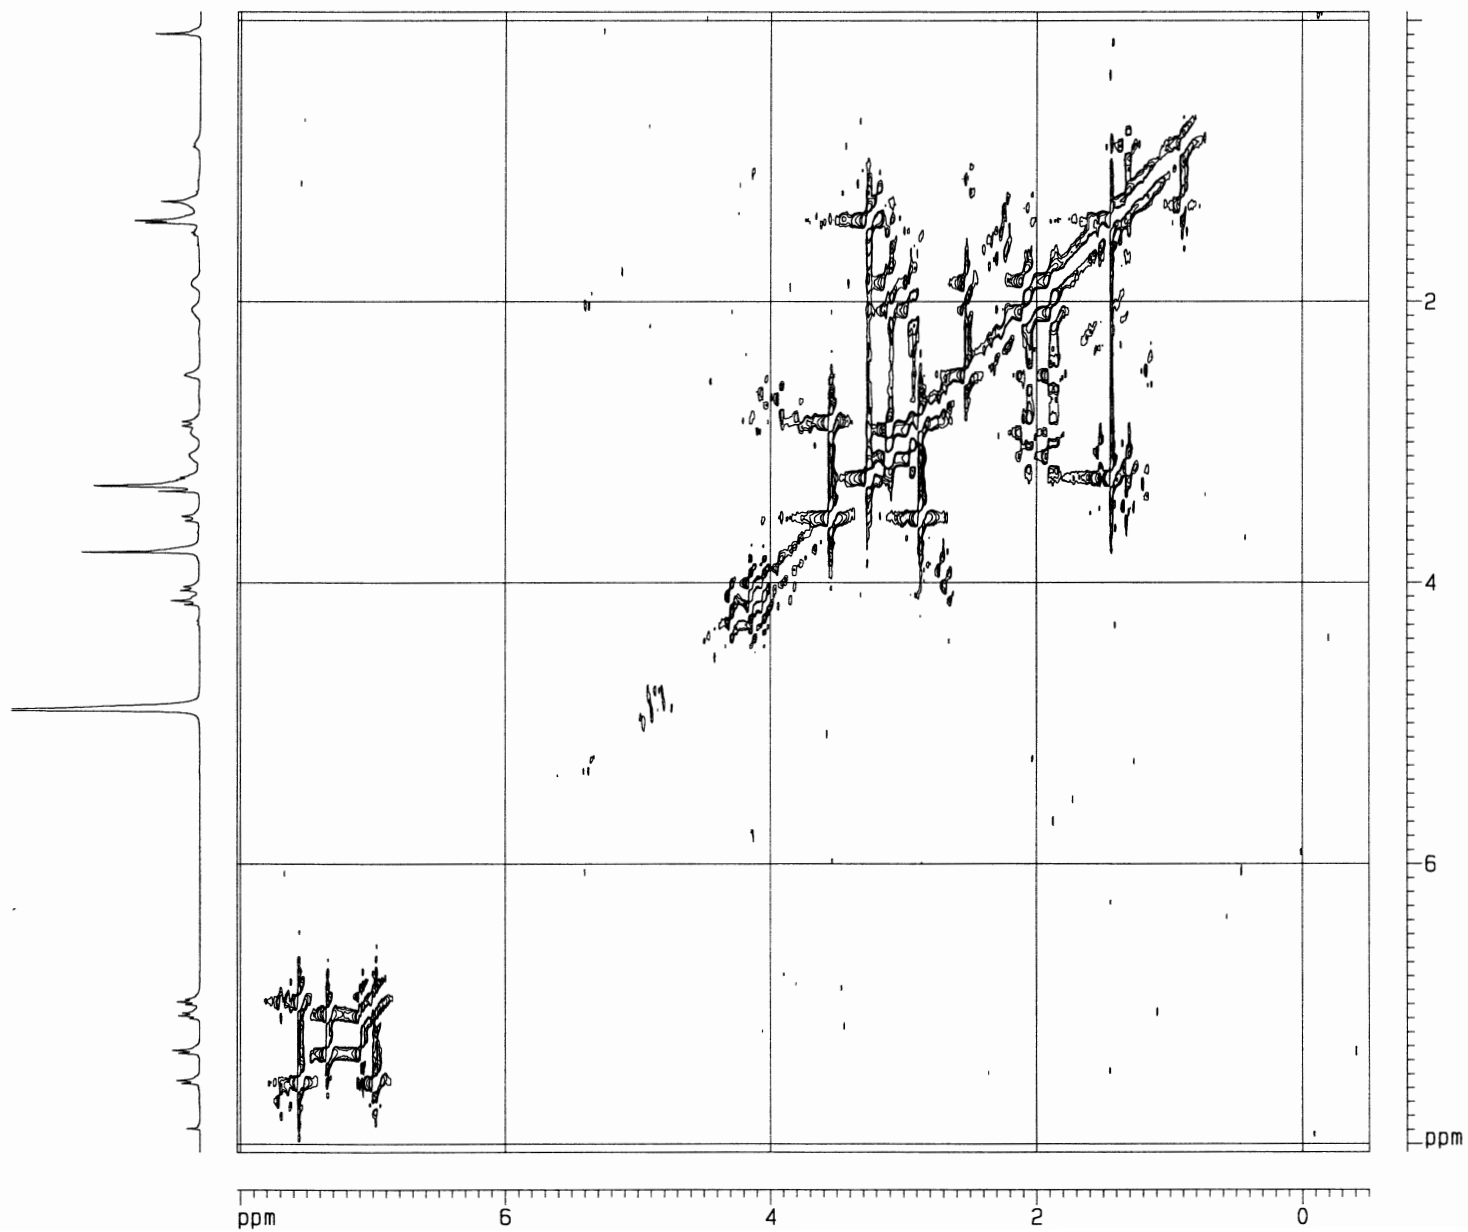

FYQ-V-015 NOESY d4-MeOD

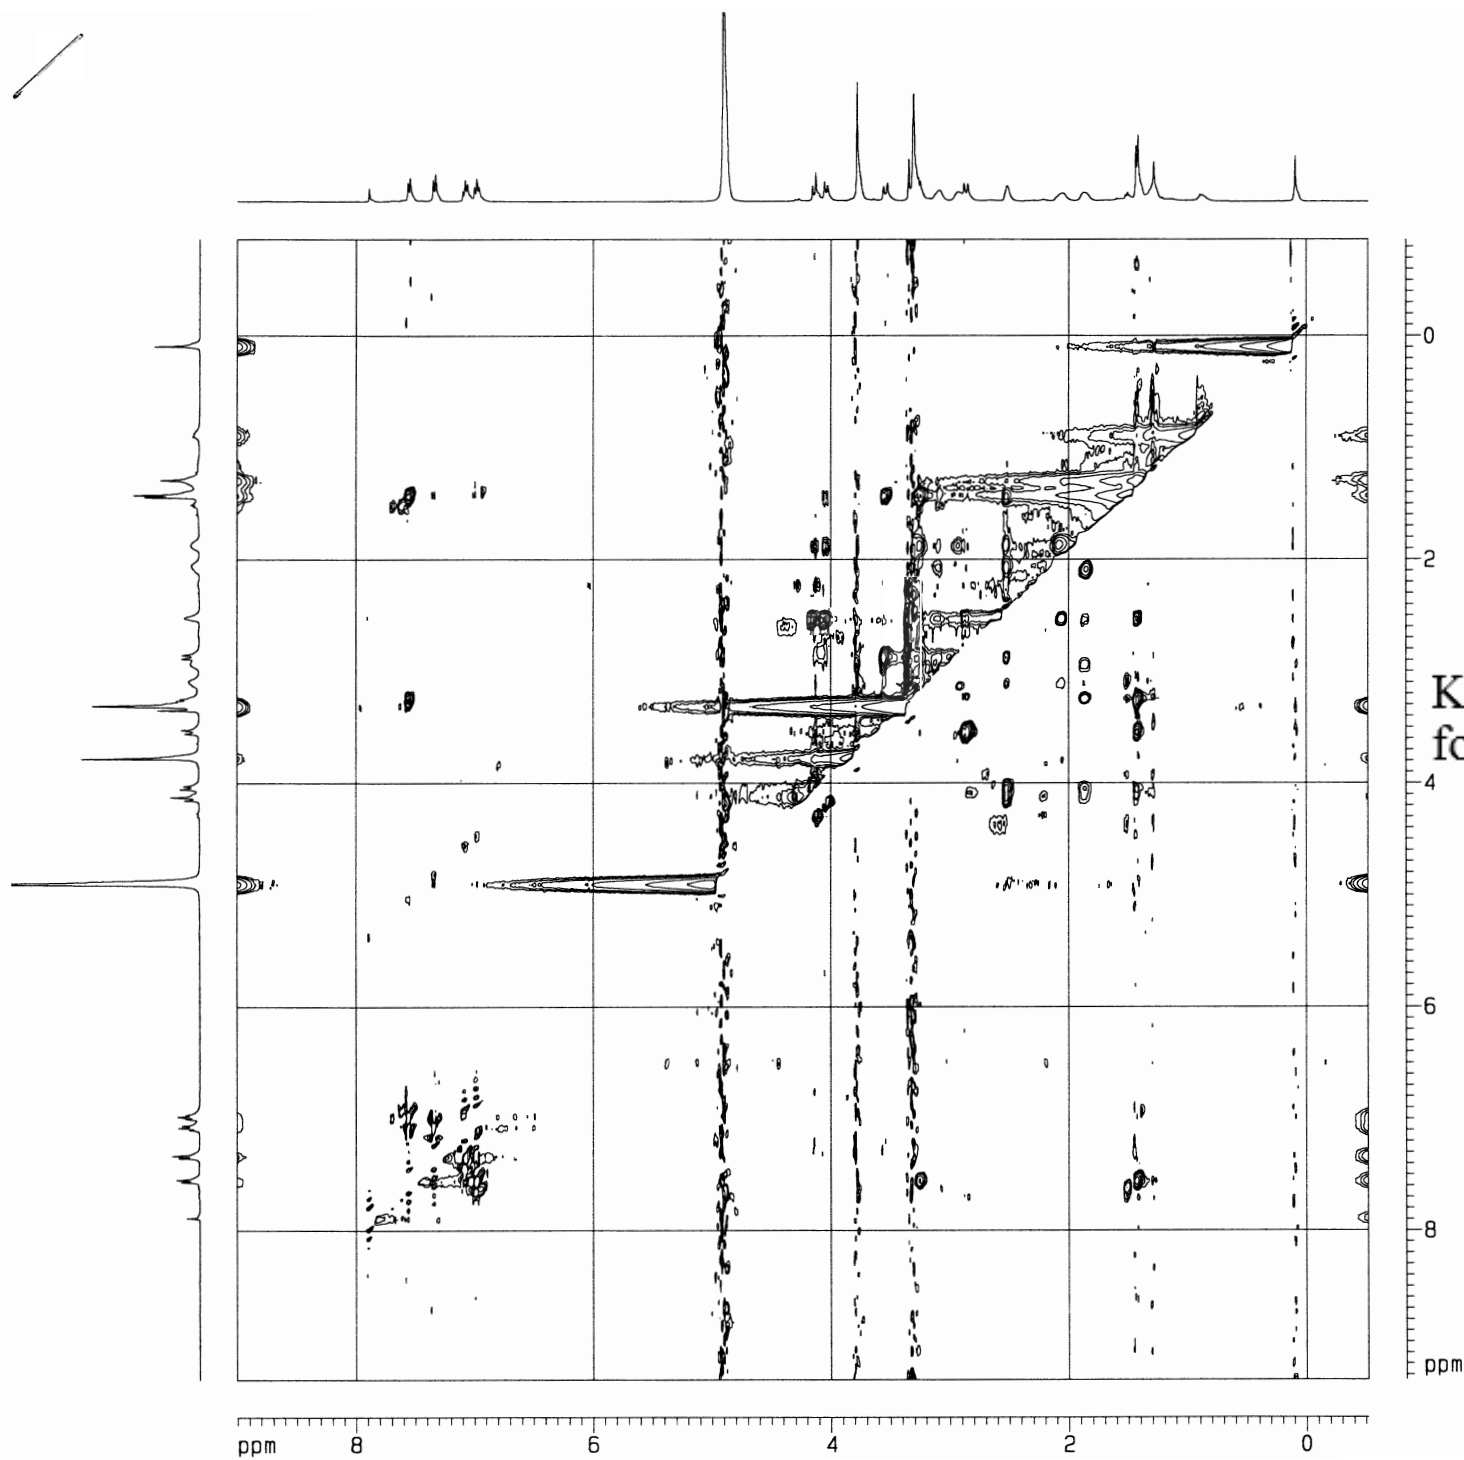

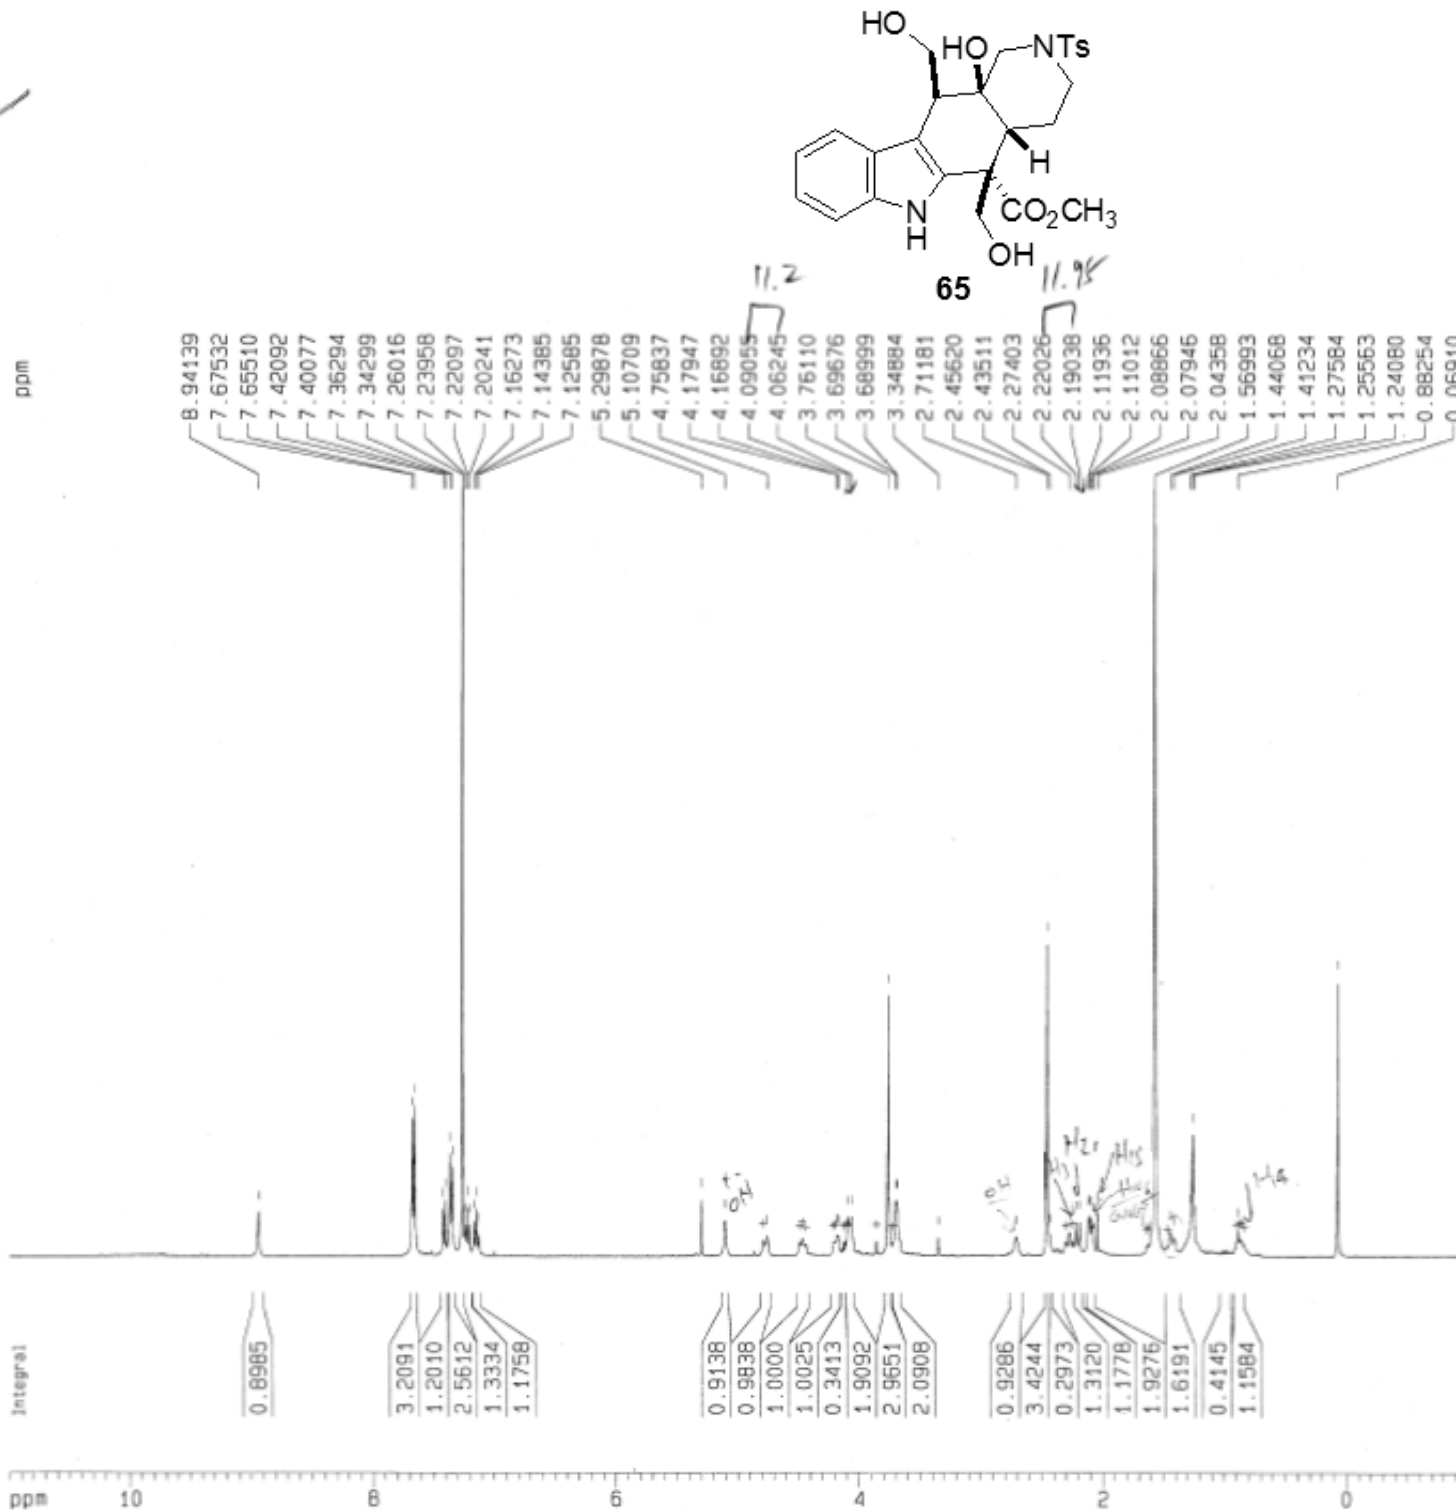

## Current Data Parameters

NAME 081011FJ11-071  
 EXPNO 1  
 PROCNO 1

## F2 - Acquisition Parameters

Date\_ 20110610  
 Time 23.44  
 INSTRUM spect  
 PROBHD 5 mm BBI 1H-  
 PULPROG zg30  
 TD 65536  
 SOLVENT CDCl3  
 NS 16  
 DS 2  
 SWH 8278.146 Hz  
 FIDRES 0.126314 Hz  
 AQ 3.9584243 sec  
 RG 512  
 DW 60.400 usec  
 DE 6.00 usec  
 TE 300.0 K  
 D1 1.00000000 sec

## ----- CHANNEL f1 -----

NUC1 1H  
 P1 6.45 usec  
 PL1 0.00 dB  
 SF01 400.1324710 MHz

## F2 - Processing parameters

SI 32768  
 SF 400.1300091 MHz  
 MDW EM  
 SSB 0  
 LB 0.30 Hz  
 GB 0  
 PC 1.00

## 1D NMR plot parameters

CX 20.00 cm  
 F1P 11.000 ppm  
 F1 4401.43 Hz  
 F2P -1.000 ppm  
 F2 -400.13 Hz  
 PPMCM 0.60000 ppm/cm  
 HZCM 240.07800 Hz/cm



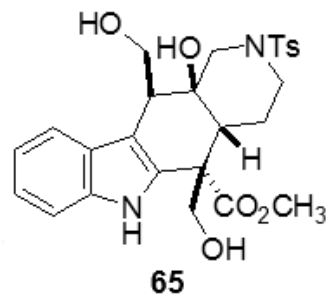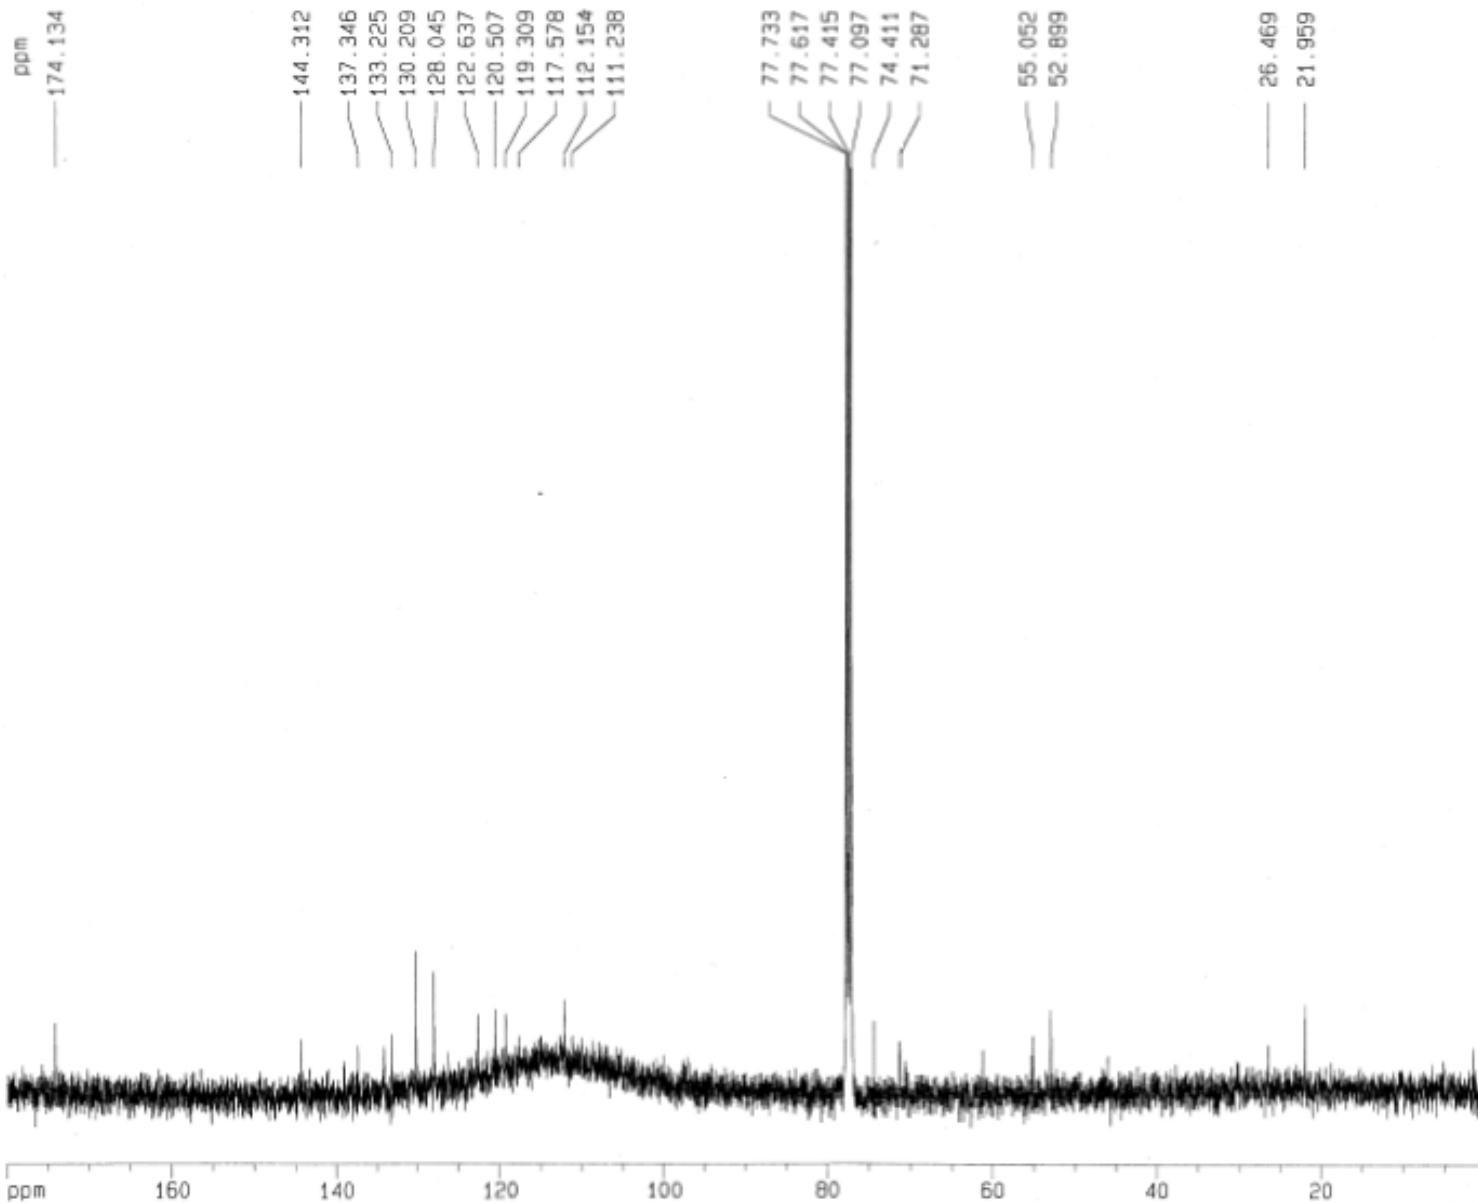

Current Data Parameters  
 NAME 081011FJ11-071  
 EXPNO 2  
 PROCNO 1

F2 - Acquisition Parameters  
 Date\_ 20110811  
 Time 7.23  
 INSTRUM spect  
 PROBHD 5 mm BBI 5H-  
 PULPROG zgpg30  
 TD 65536  
 SOLVENT CDCl3  
 NS 8192  
 DS 4  
 SMH 25125.629 Hz  
 FIDRES 0.383387 Hz  
 AQ 1.3042164 sec  
 RG 6502  
 DM 19.900 usec  
 DE 6.00 usec  
 TE 300.0 K  
 D1 2.00000000 sec  
 d11 0.03000000 sec  
 d12 0.00002000 sec

\*\*\*\*\* CHANNEL f1 \*\*\*\*\*  
 NUC1 13C  
 P1 16.35 usec  
 PL1 -6.00 dB  
 SF01 100.6237959 MHz

\*\*\*\*\* CHANNEL f2 \*\*\*\*\*  
 CPDPRG2 waltz16  
 NUC2 1H  
 PCPD2 114.00 usec  
 PL2 0.00 dB  
 PL12 24.00 dB  
 PL13 24.00 dB  
 SF02 400.1316005 MHz

F2 - Processing parameters  
 SI 32768  
 SF 100.6127290 MHz  
 WDM EM  
 SSB 0  
 LB 1.00 Hz  
 GB 0  
 PC 1.40

1D NMR plot parameters  
 CX 20.00 cm  
 F1P 180.000 ppm  
 F1 18110.29 Hz  
 F2P 0.000 ppm  
 F2 0.00 Hz  
 PRMCH 9.00000 ppm/cm  
 HZCM 905.51459 Hz/cm

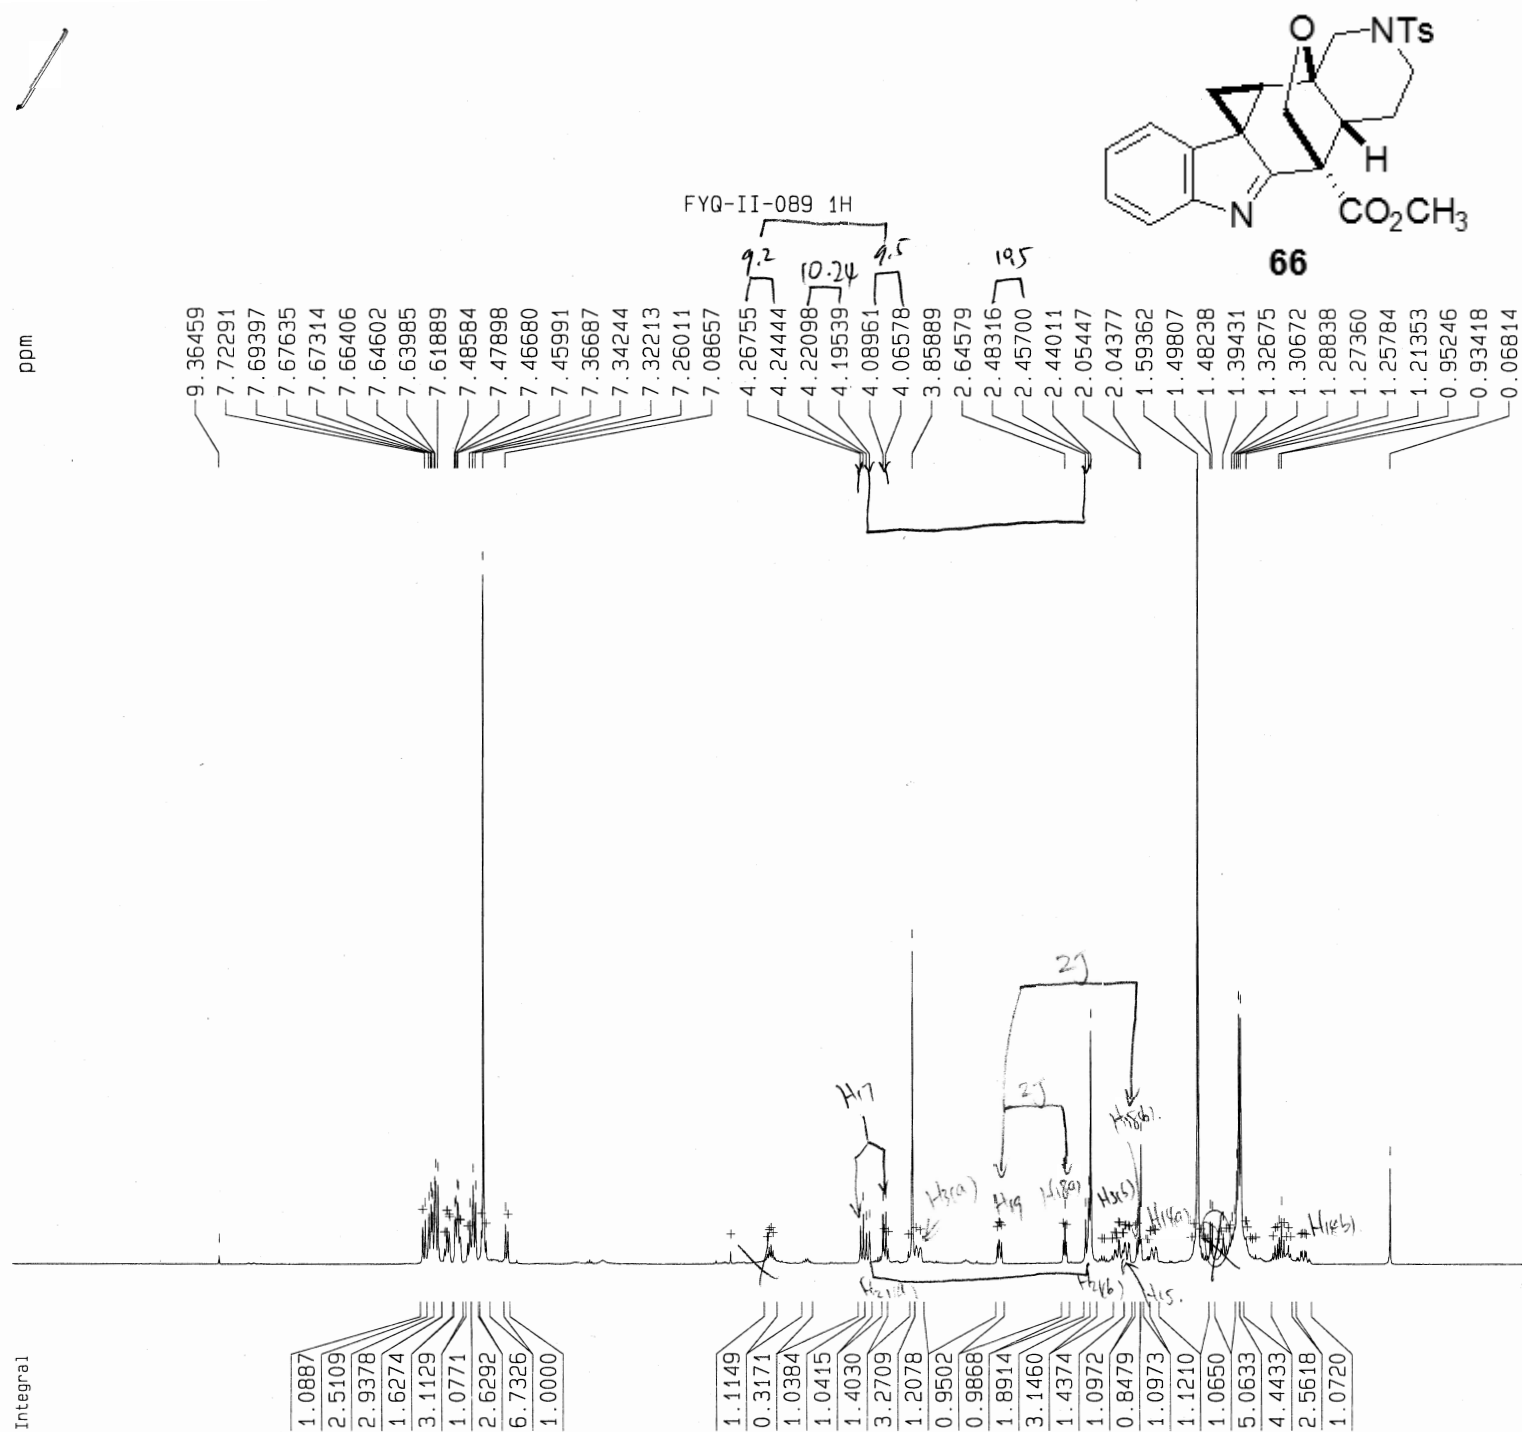

Current Data Parameters  
 NAME 081811FJII-089  
 EXPNO 2  
 PROCNO 1

F2 - Acquisition Parameters  
 Date\_ 20110818  
 Time 22.19  
 INSTRUM spect  
 PROBHD 5 mm BBI 1H-  
 PULPROG zg30  
 TD 65536  
 SOLVENT CDC13  
 NS 16  
 DS 2  
 SWH 8278.146 Hz  
 FIDRES 0.126314 Hz  
 AQ 3.9584243 sec  
 RG 456.1  
 DW 60.400 usec  
 DE 6.00 usec  
 TE 300.0 K  
 D1 1.00000000 sec

NUC1 1H  
 P1 6.45 usec  
 PL1 0.00 dB  
 SF01 400.1324710 MHz

F2 - Processing parameters  
 SI 32768  
 SF 400.1300091 MHz  
 WDW EM  
 SSB 0  
 LB 0.30 Hz  
 GB 0  
 PC 1.00

1D NMR plot parameters  
 CX 20.00 cm  
 F1P 11.000 ppm  
 F1 4401.43 Hz  
 F2P -1.000 ppm  
 F2 -400.13 Hz  
 PPMCM 0.60000 ppm/cm  
 HZCM 240.07800 Hz/cm

FYQ-II-089 C13

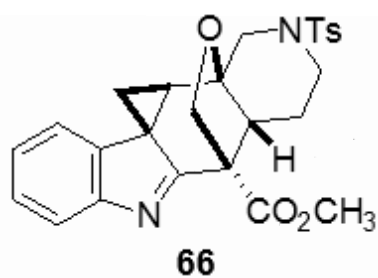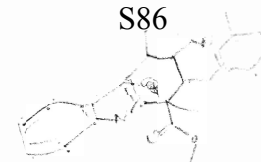

ppm

170.150

132.369  
132.270  
132.170  
130.073  
128.782  
128.661  
127.652  
127.254  
125.247  
121.782  
118.936  
116.644  
112.848  
107.943  
106.306

78.916  
77.547  
77.434  
77.230  
76.912  
72.808

60.512  
53.489  
52.951  
46.007  
42.161

24.313  
22.166  
22.022  
21.760

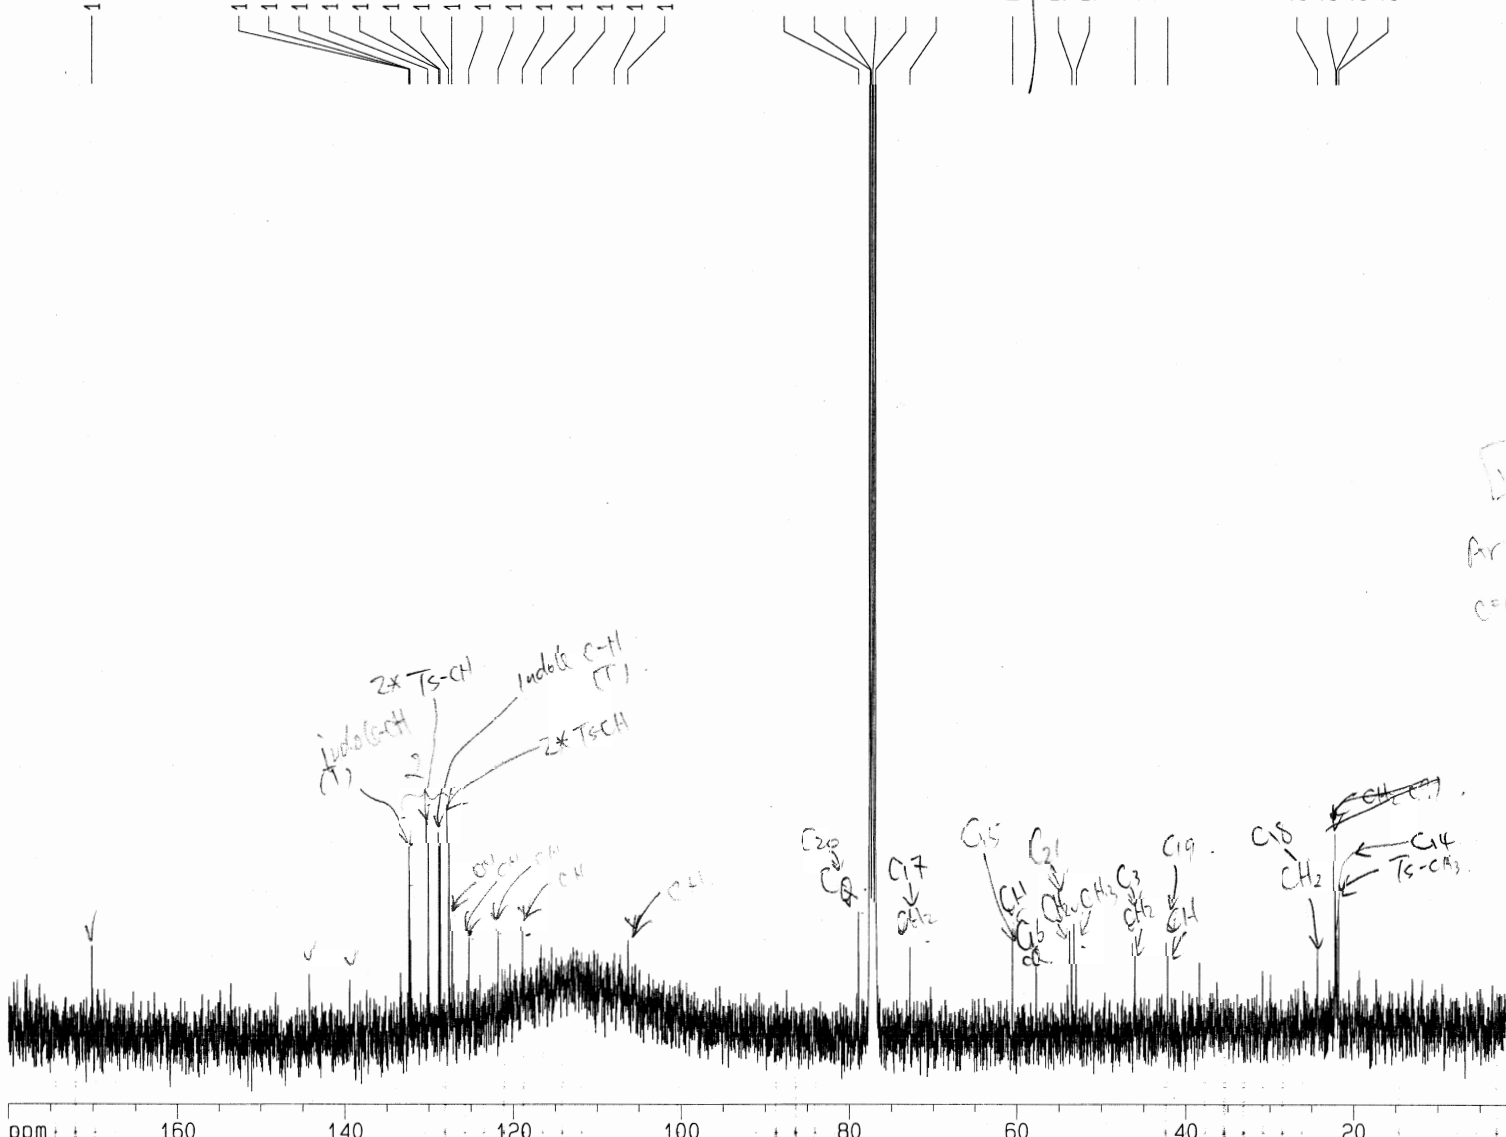

Current Data Parameters  
NAME 081811FJII-089  
EXPNO 7  
PROCNO 1

F2 - Acquisition Parameters  
Date\_ 20110819  
Time 8.49  
INSTRUM spect  
PROBHD 5 mm BBI 1H-  
PULPROG zgpg30  
TD 65536  
SOLVENT CDC13  
NS 6849  
DS 4  
SWH 25125.629 Hz  
FIDRES 0.383387 Hz  
AQ 1.3042164 sec  
RG 16384  
DW 19.900 usec  
DE 6.00 usec  
TE 300.0 K  
D1 2.00000000 sec  
d11 0.03000000 sec  
d12 0.00002000 sec

===== CHANNEL f1 =====  
NUC1 13C  
P1 16.35 usec  
PL1 -6.00 dB  
SF01 100.6237959 MHz

===== CHANNEL f2 =====  
CPDPRG2 waltz16  
NUC2 1H  
PCPD2 114.00 usec  
PL2 0.00 dB  
PL12 24.00 dB  
PL13 24.00 dB  
SF02 400.1316005 MHz

F2 - Processing parameters  
SI 32768  
SF 100.6127476 MHz  
WDW EM  
SSB 0  
LB 1.00 Hz  
GB 0  
PC 1.40

1D NMR plot parameters  
CX 20.00 cm  
F1P 180.000 ppm  
F1 18110.29 Hz  
F2P 0.000 ppm  
F2 0.00 Hz  
PPMCM 9.00000 ppm/cm  
HZCM 905.51471 Hz/cm

111  
Ar. 12  
C=O

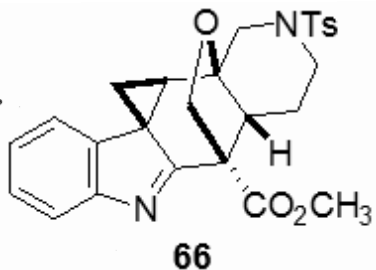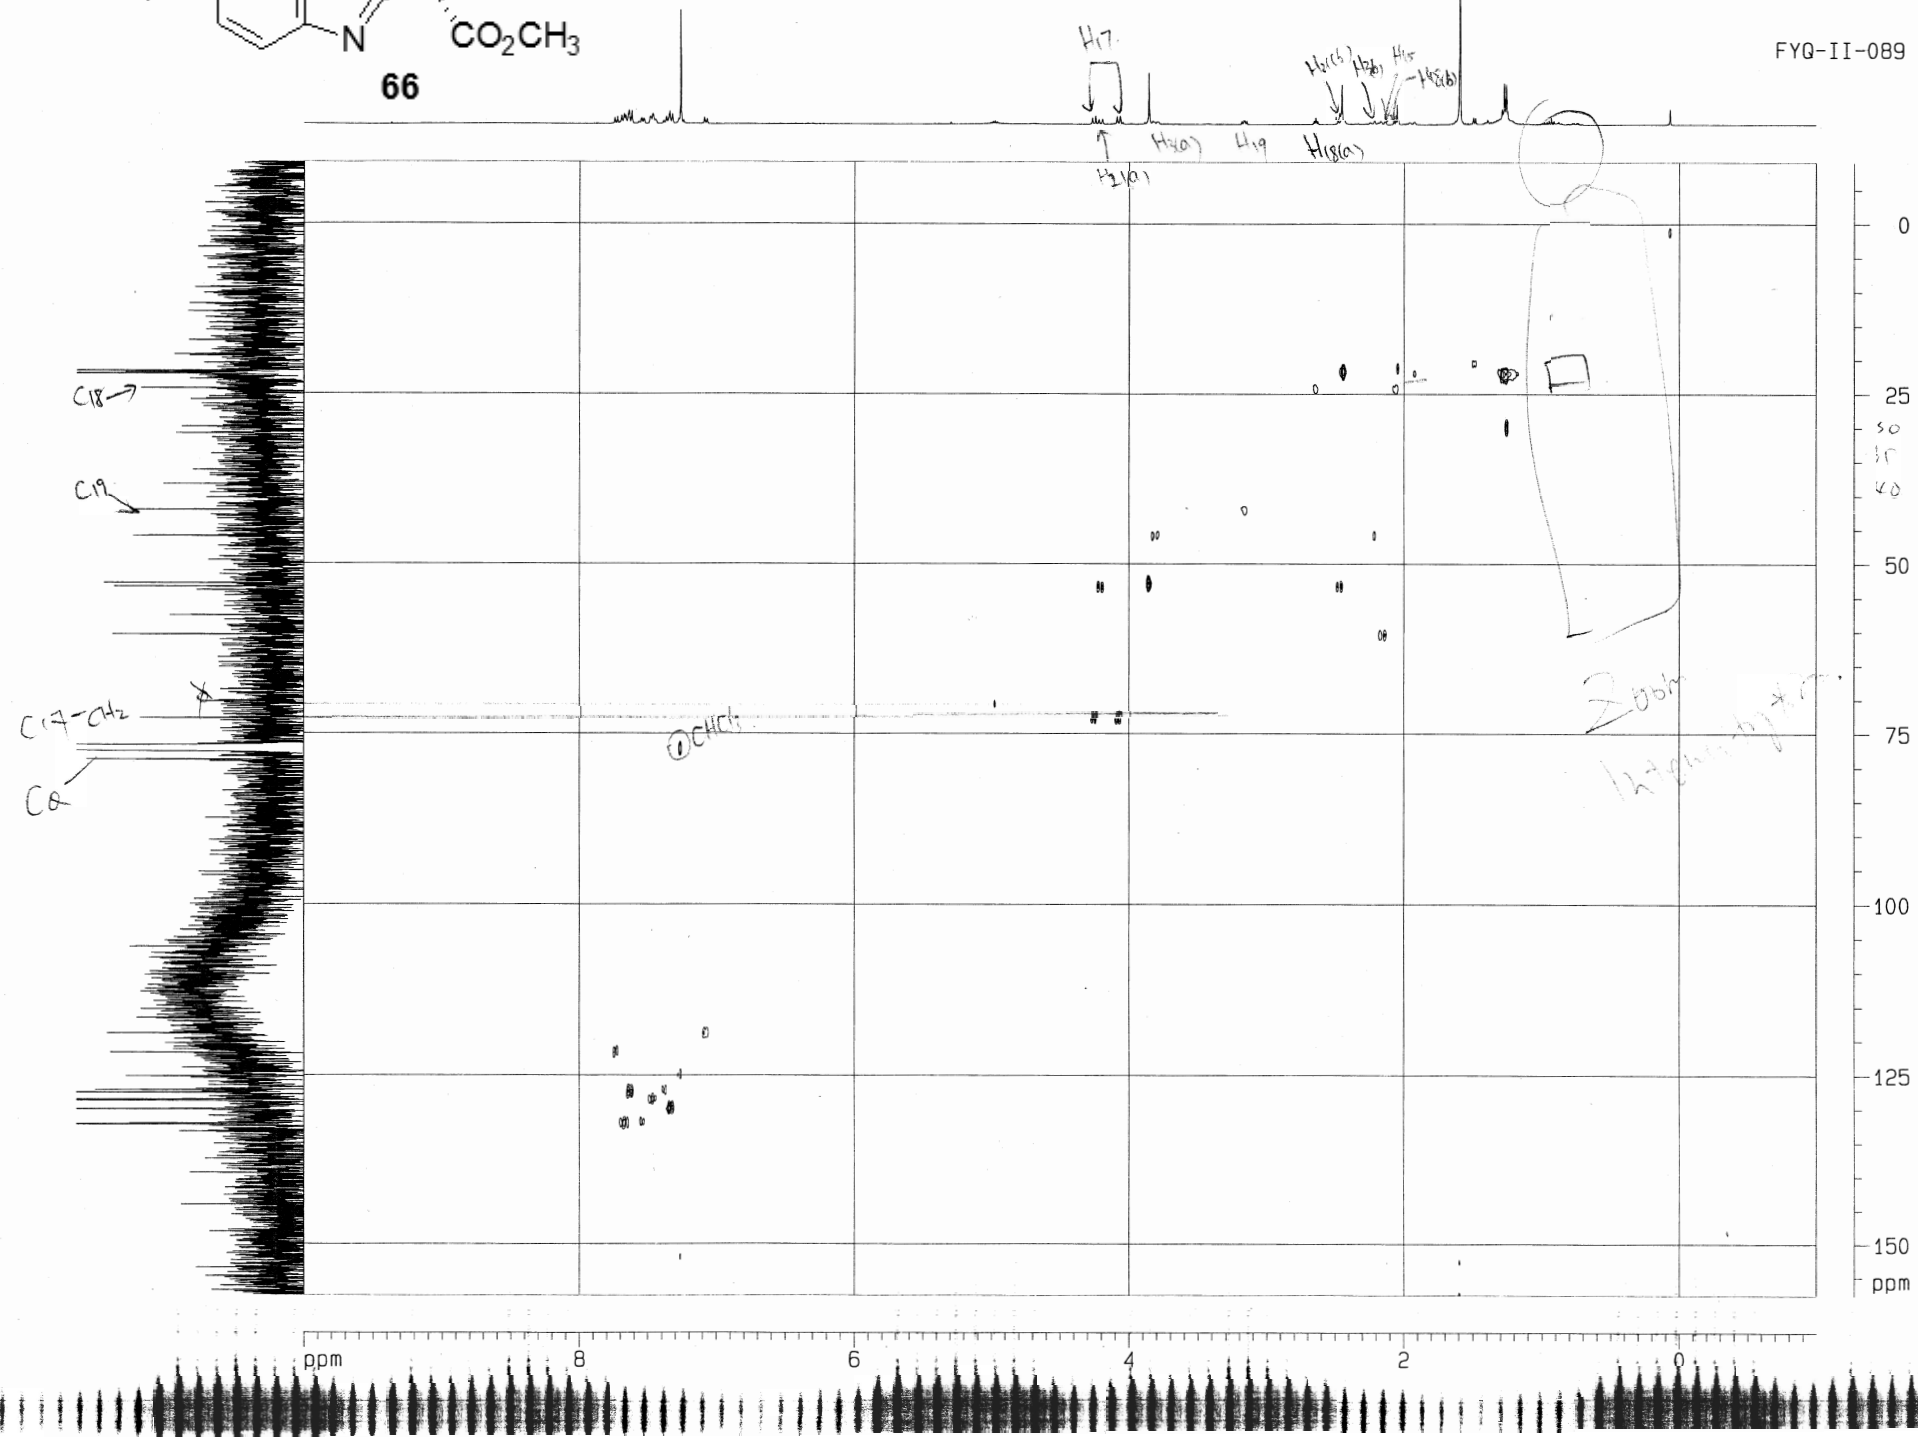

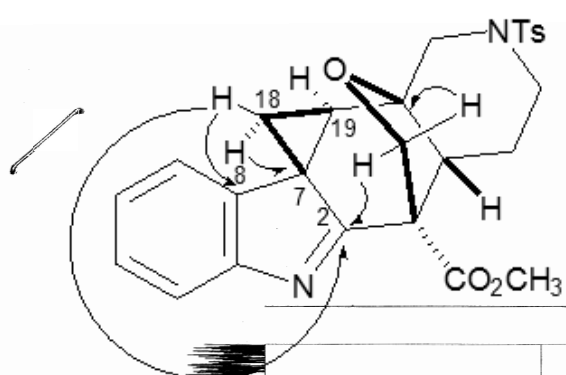

Key HMBC Correlations  
for cyclopropane 66

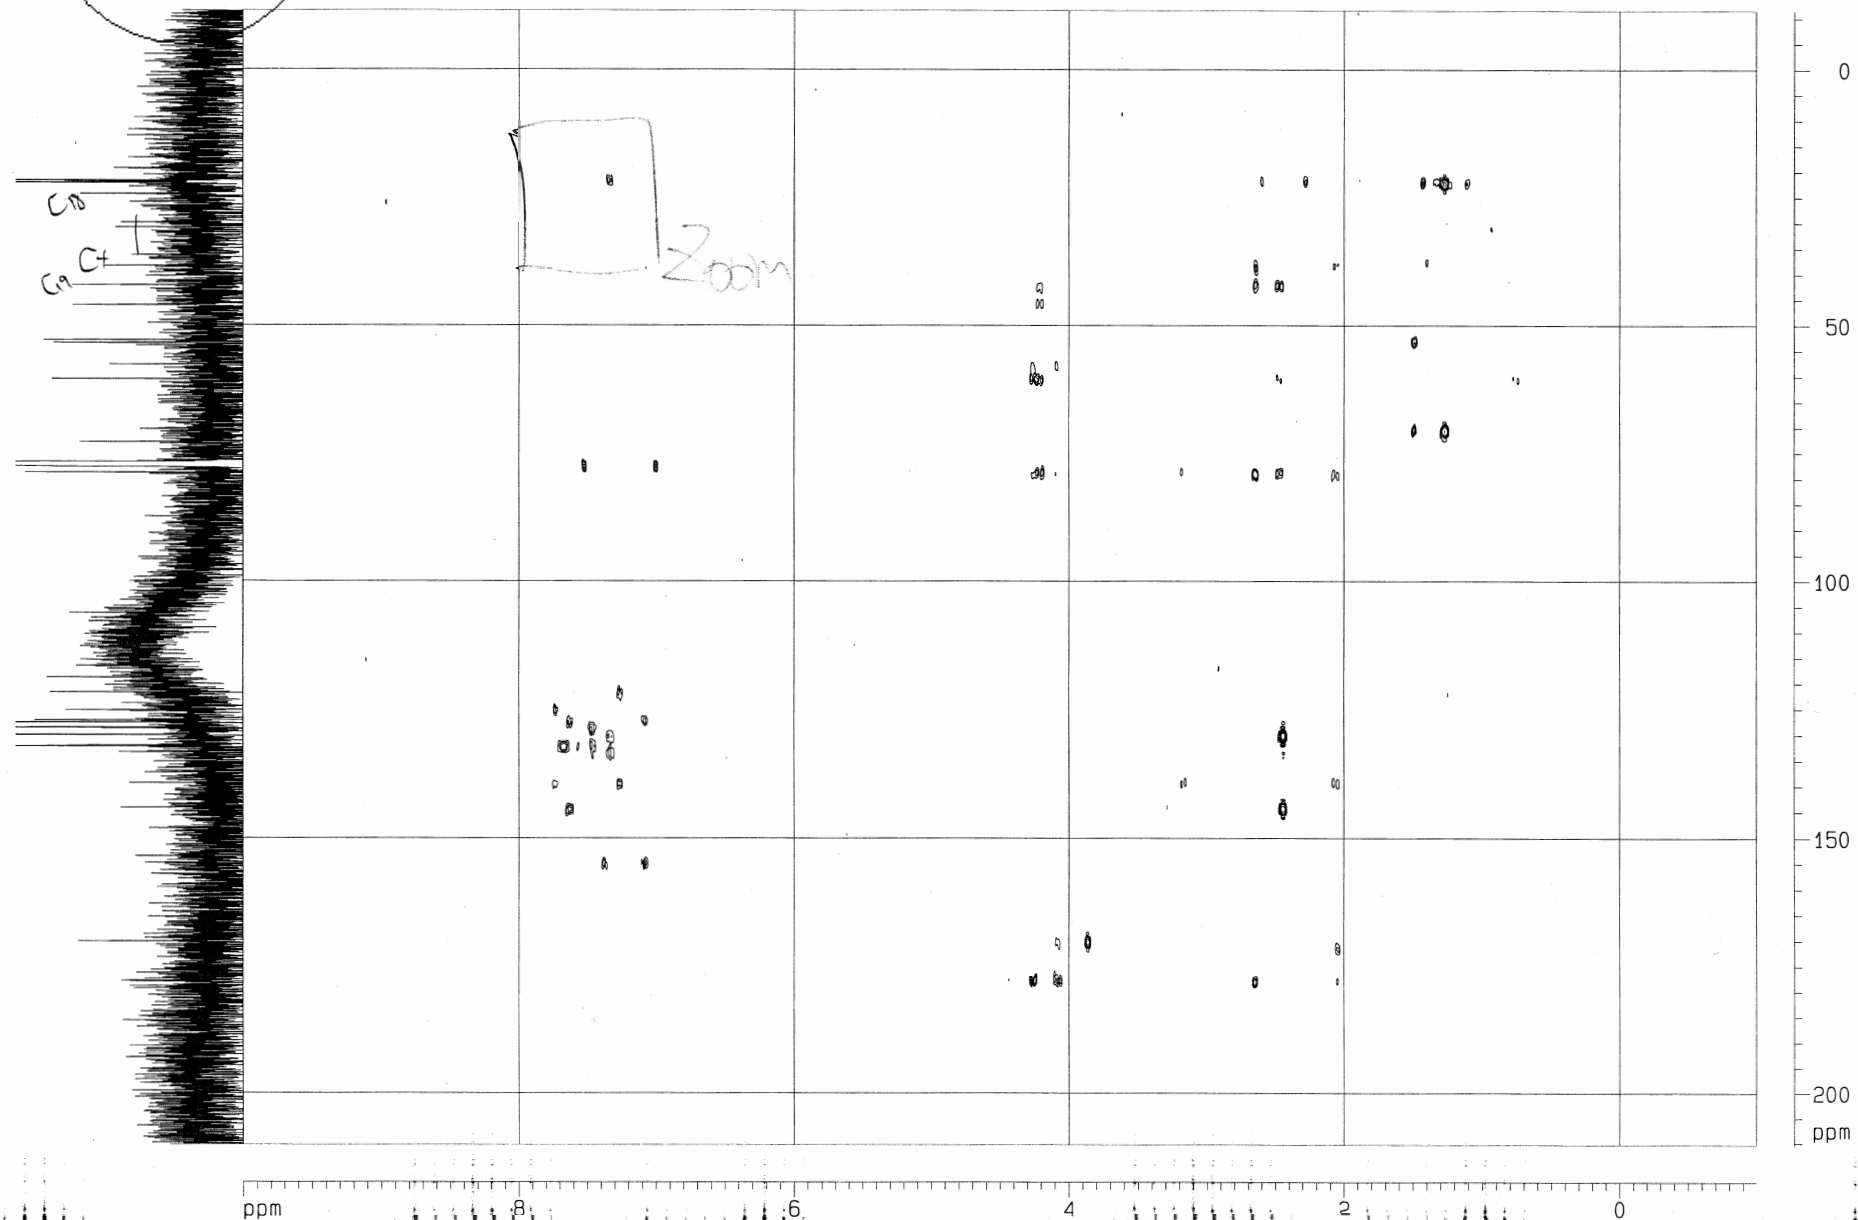

FYQ-II-089 COSY

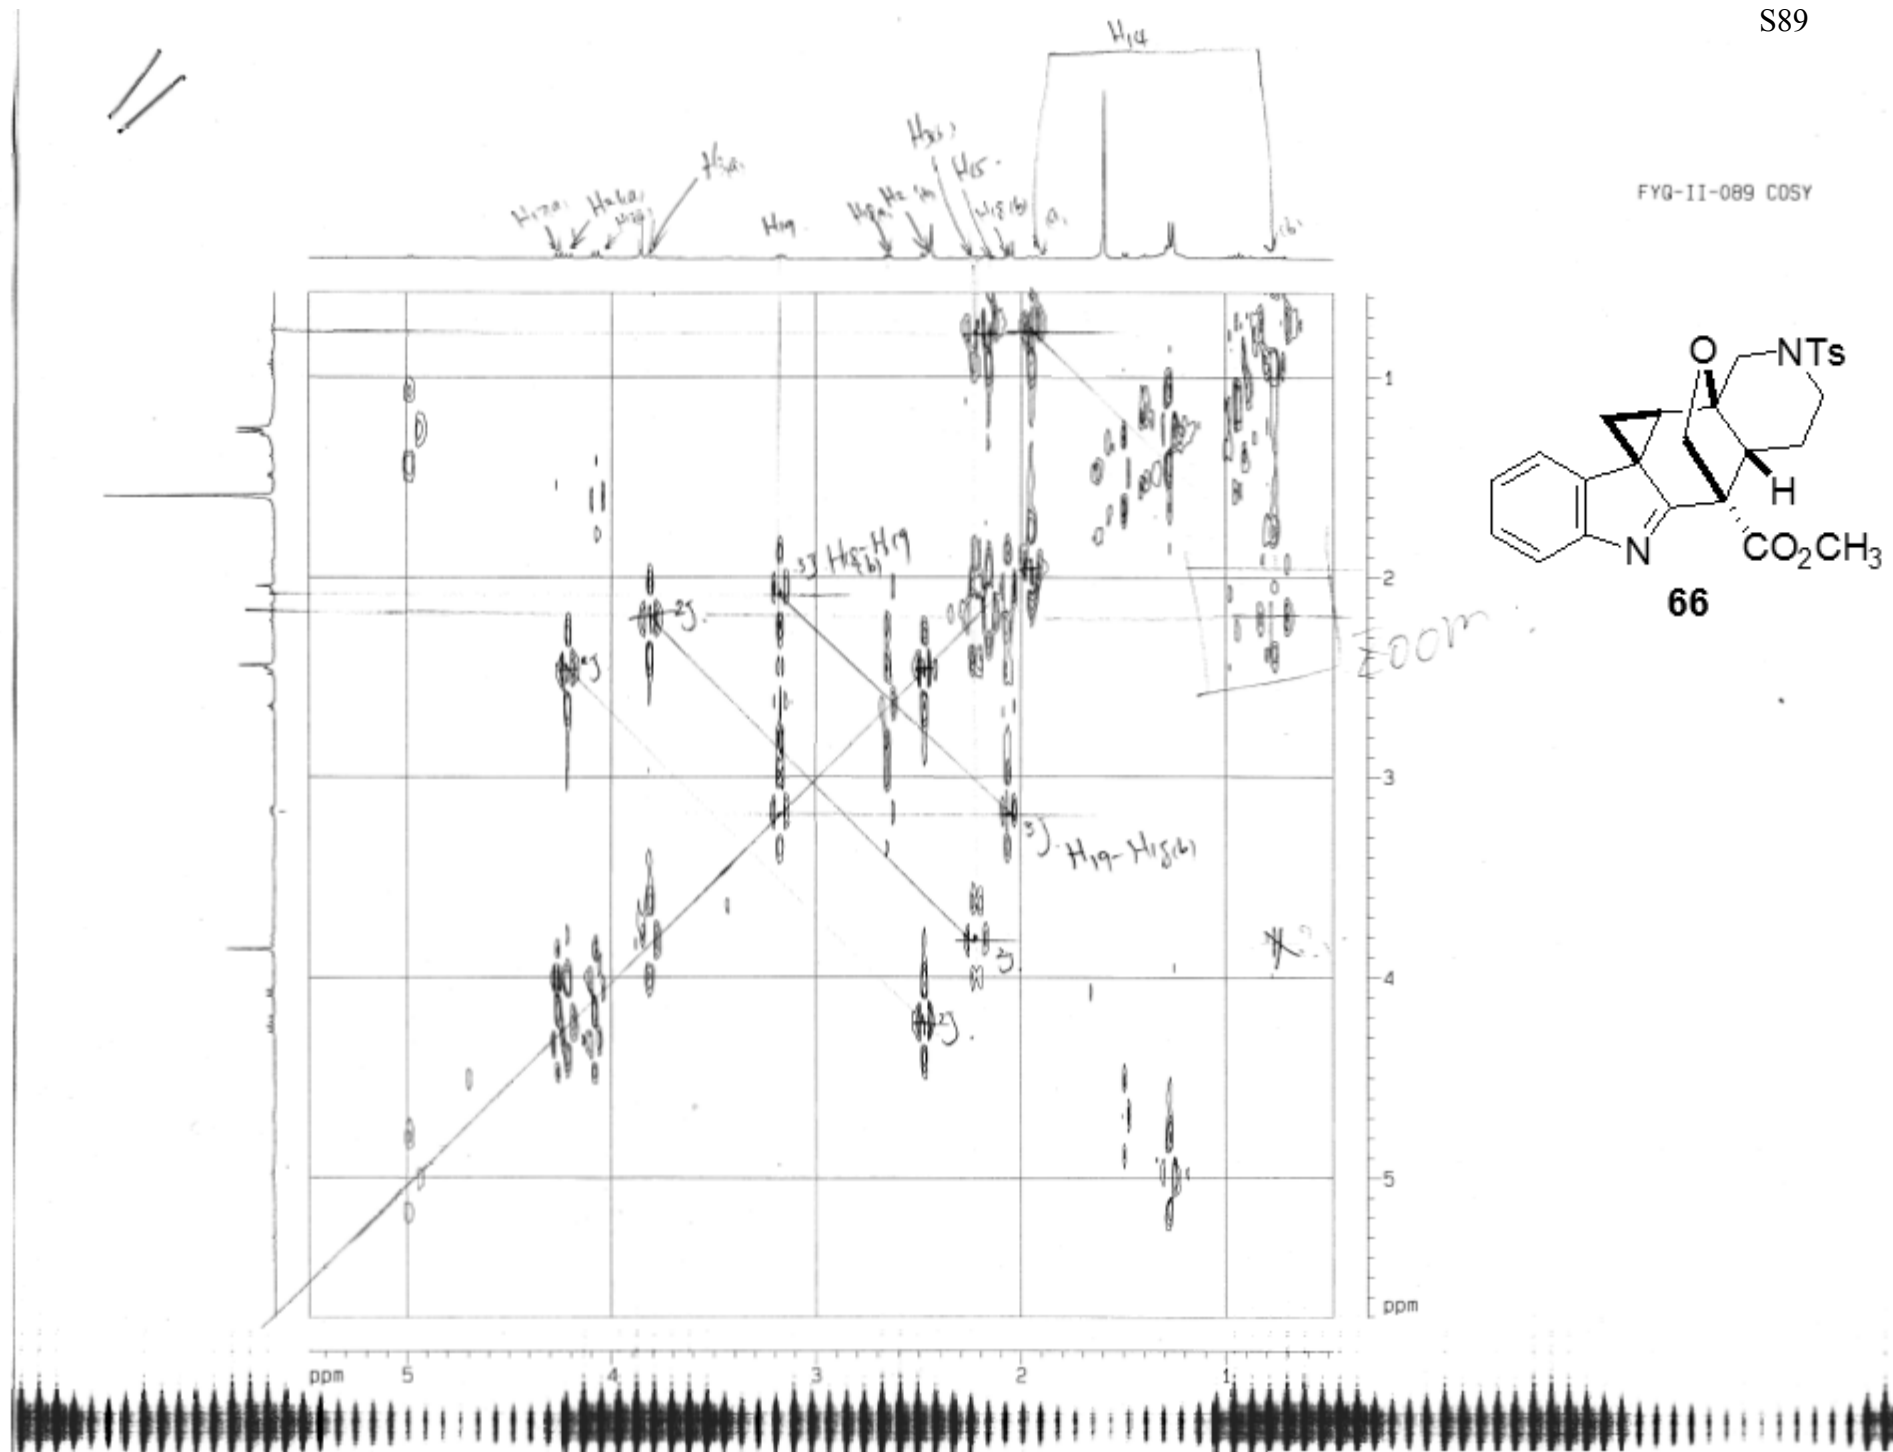

FYQ-II-089 NOESY

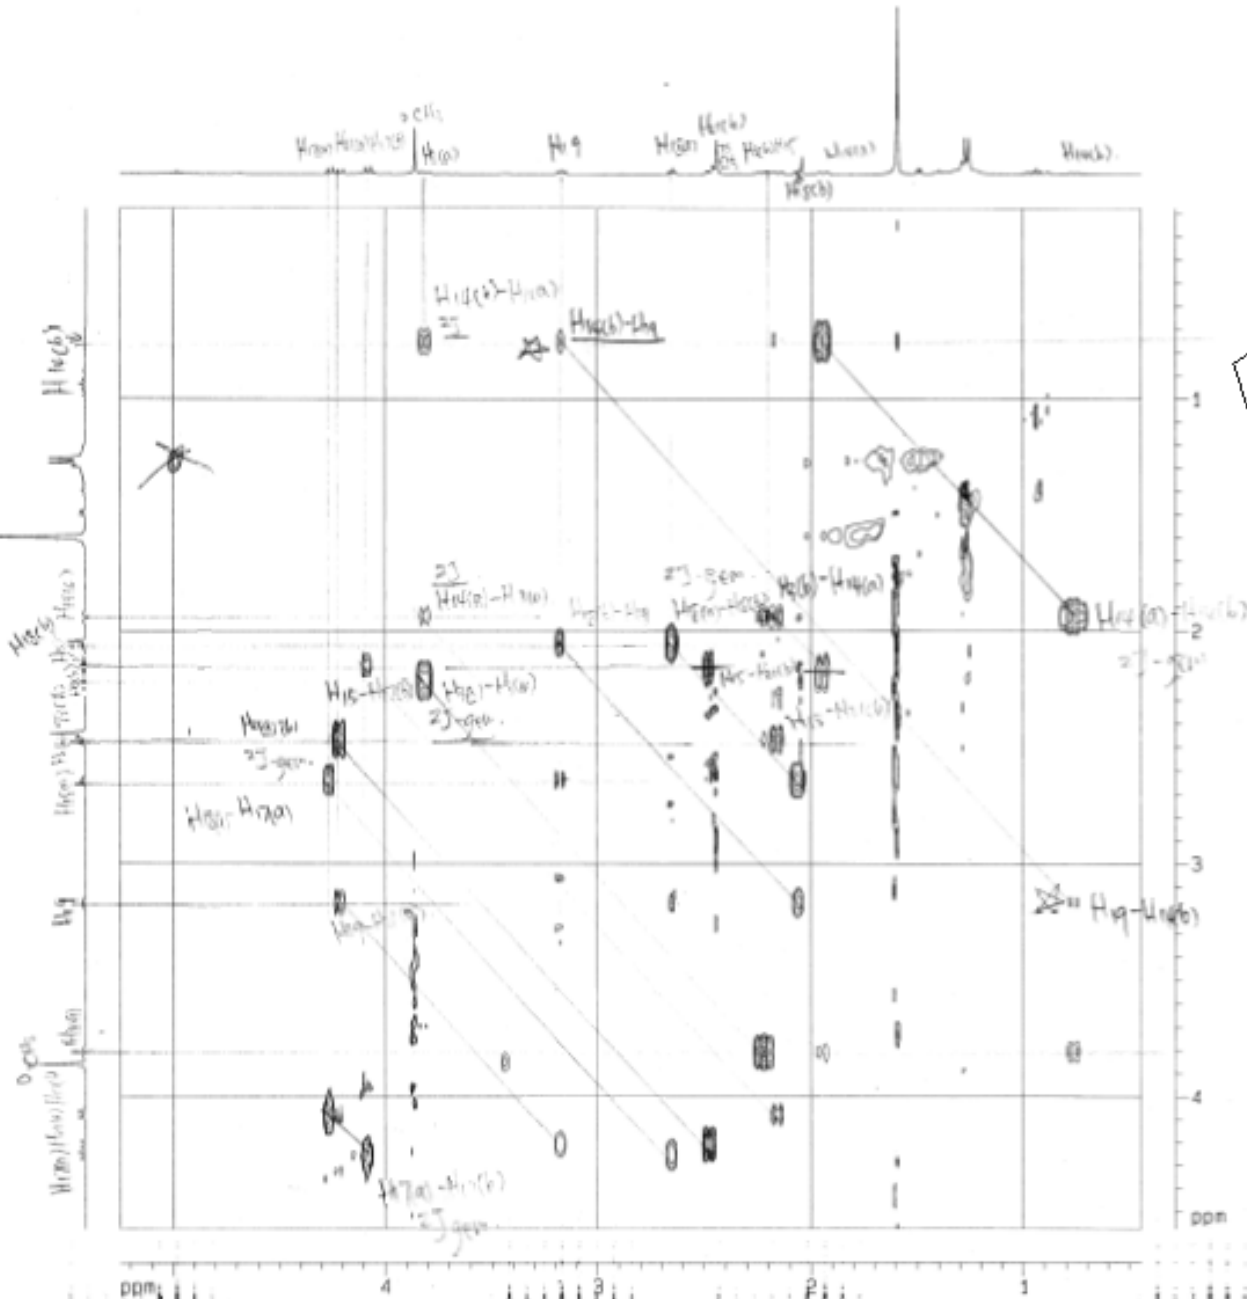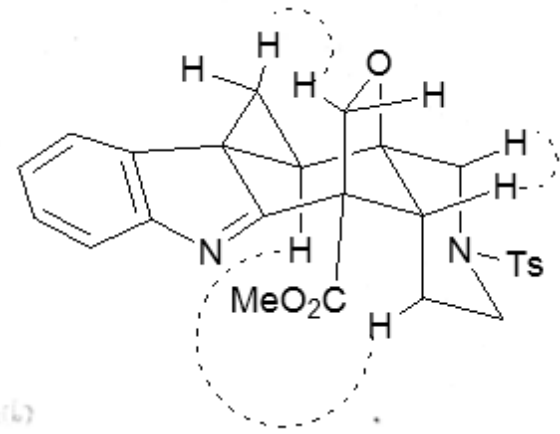

----- :Key nOe  
Correlations for 66  
double chair

FYQ-II-096100101 1H

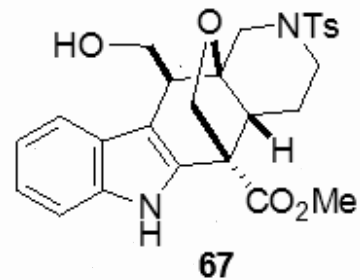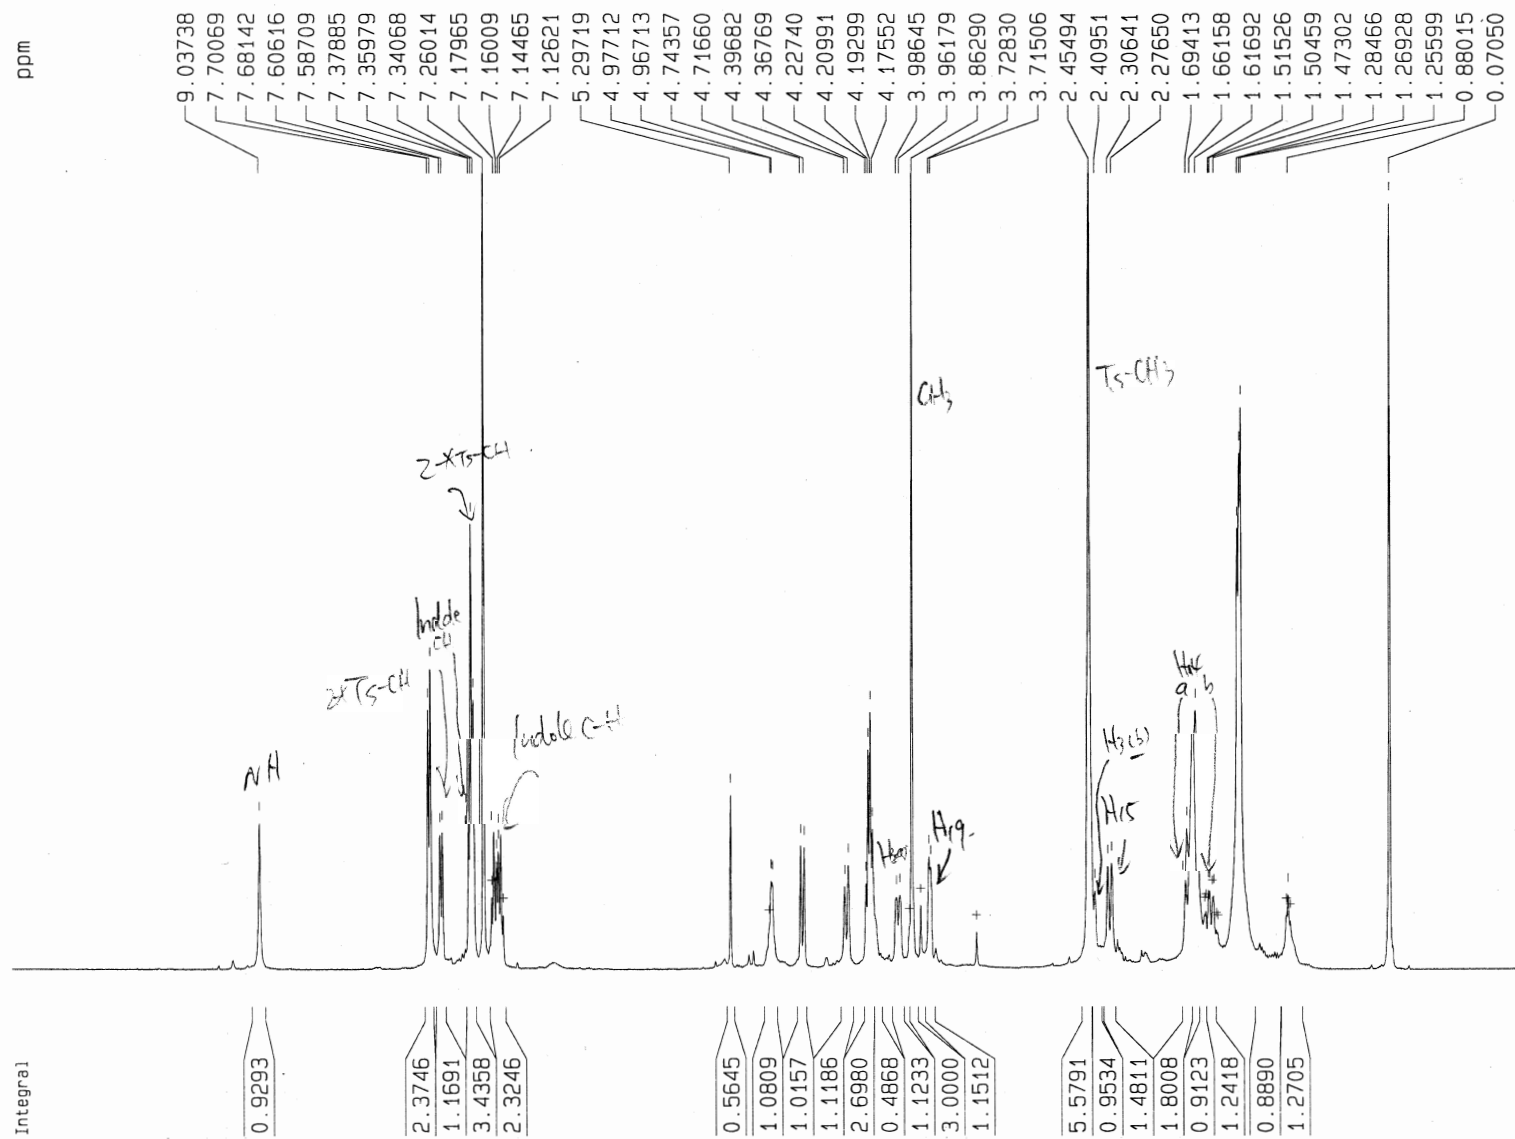

Current Data Parameters  
NAME 082411FJII-096  
EXPNO 2  
PROCNO 1

F2 - Acquisition Parameters  
Date\_ 20110824  
Time 19.08  
INSTRUM spect  
PROBHD 5 mm BBI 1H-  
PULPROG zg30  
TD 65536  
SOLVENT CDCl3  
NS 16  
DS 2  
SWH 8278.146 Hz  
FIDRES 0.126314 Hz  
AQ 3.9584243 sec  
RG 203.2  
DW 60.400 usec  
DE 6.00 usec  
TE 300.0 K  
D1 1.00000000 sec

===== CHANNEL f1 =====  
NUC1 1H  
P1 6.45 usec  
PL1 0.00 dB  
SFO1 400.1324710 MHz

F2 - Processing parameters  
SI 32768  
SF 400.1300091 MHz  
WDW EM  
SSB 0  
LB 0.30 Hz  
GB 0  
PC 1.00

1D NMR plot parameters  
CX 20.00 cm  
F1P 11.000 ppm  
F1 4401.43 Hz  
F2P -1.000 ppm  
F2 -400.13 Hz  
PPMCM 0.60000 ppm/cm  
HZCM 240.07800 Hz/cm



FYQ-II-096100101 C13 8k

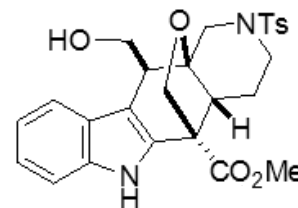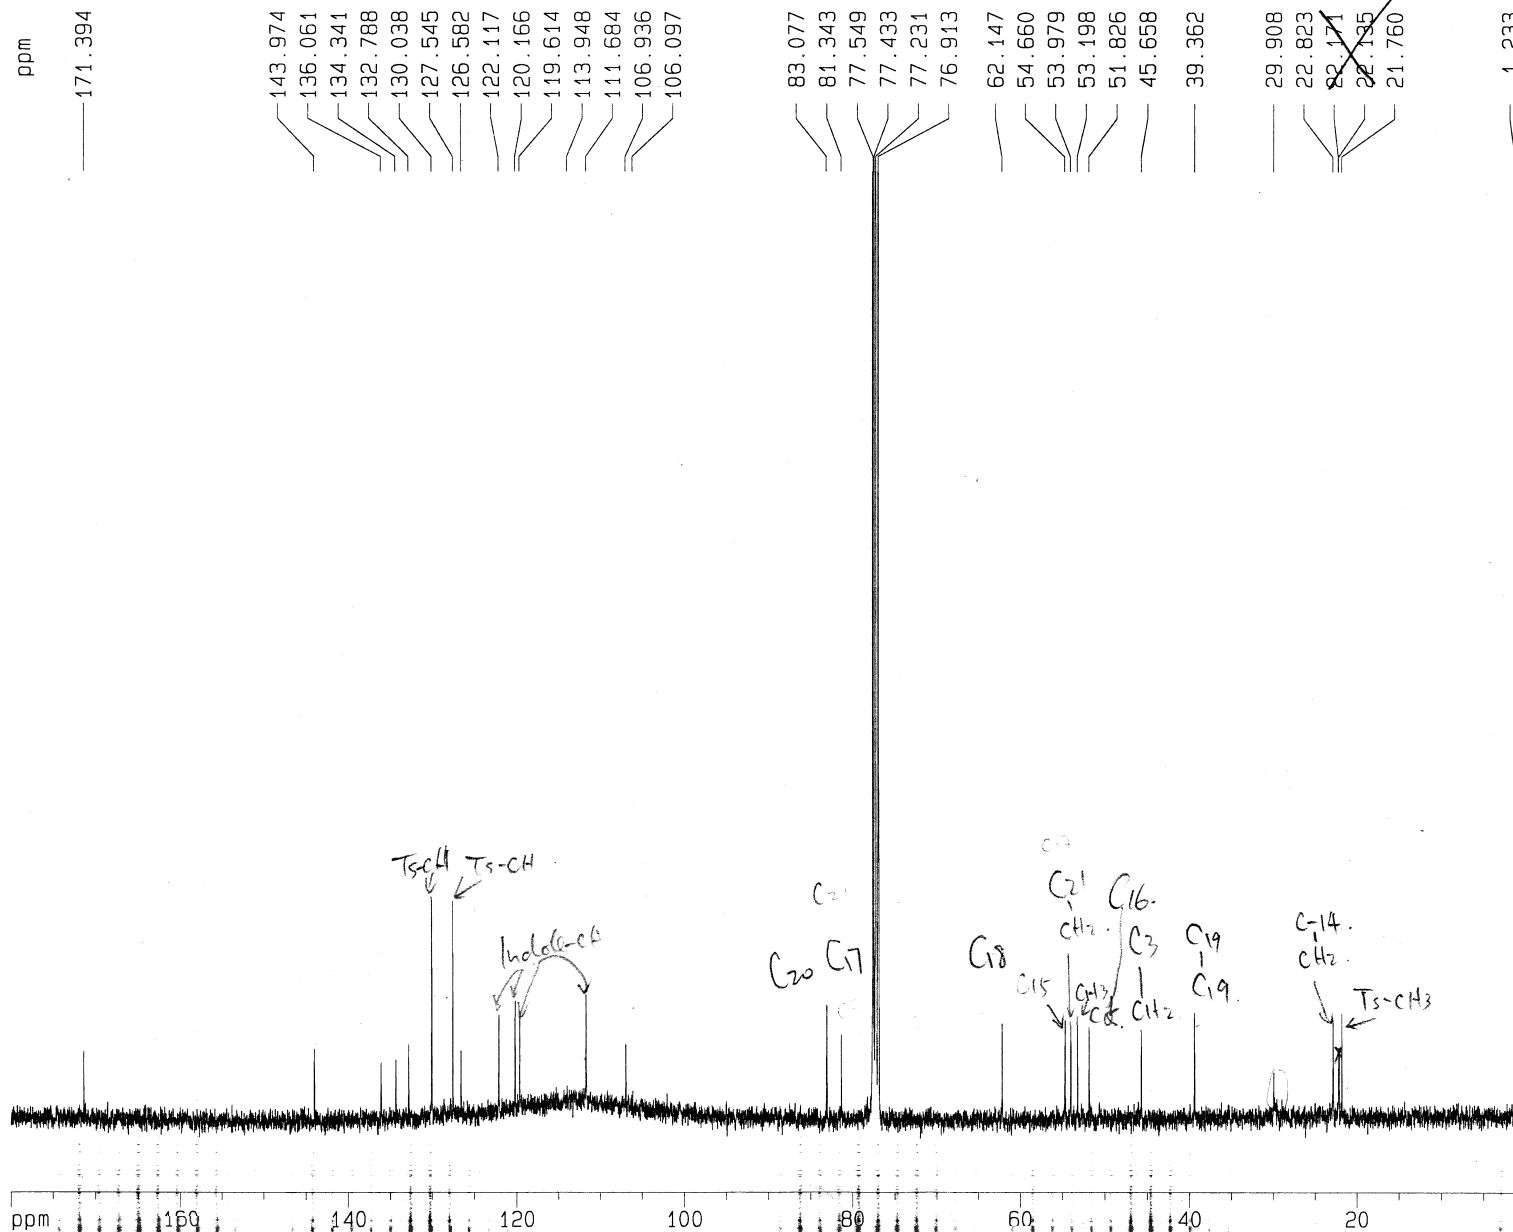

Current Data Parameters  
 NAME 082411FJII-096  
 EXPNO 7  
 PROCNO 1

F2 - Acquisition Parameters  
 Date\_ 20110825  
 Time 6.53  
 INSTRUM spect  
 PROBHD 5 mm BBI 1H-  
 PULPROG zgpg30  
 TD 65536  
 SOLVENT CDC13  
 NS 8192  
 DS 4  
 SWH 25125.629 Hz  
 FIDRES 0.383387 Hz  
 AQ 1.3042164 sec  
 RG 16384  
 DW 19.900 usec  
 DE 6.00 usec  
 TE 300.0 K  
 D1 2.00000000 sec  
 d11 0.03000000 sec  
 d12 0.00002000 sec

===== CHANNEL f1 =====  
 NUC1 13C  
 P1 16.35 usec  
 PL1 -6.00 dB  
 SF01 100.6237959 MHz

===== CHANNEL f2 =====  
 CPDPRG2 waltz16  
 NUC2 1H  
 PCPD2 114.00 usec  
 PL2 0.00 dB  
 PL12 24.00 dB  
 PL13 24.00 dB  
 SF02 400.1316005 MHz

F2 - Processing parameters  
 SI 32768  
 SF 100.6127484 MHz  
 WDW EM  
 SSB 0  
 LB 1.00 Hz  
 GB 0  
 PC 1.40

1D NMR plot parameters  
 CX 20.00 cm  
 F1P 180.000 ppm  
 F1 18110.29 Hz  
 F2P 0.000 ppm  
 F2 0.00 Hz  
 PPMCM 9.00000 ppm/cm  
 HZCM 805.51272 Hz/cm

at 93

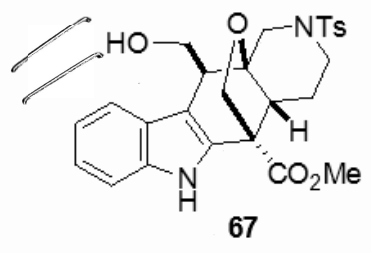

FYQ-II-096100101 HMQC

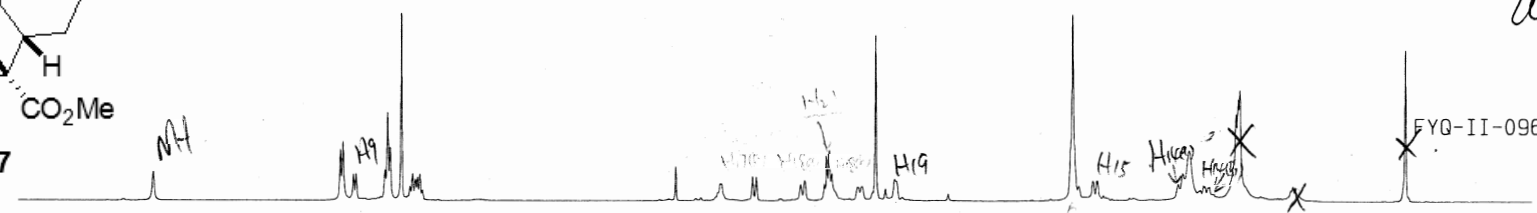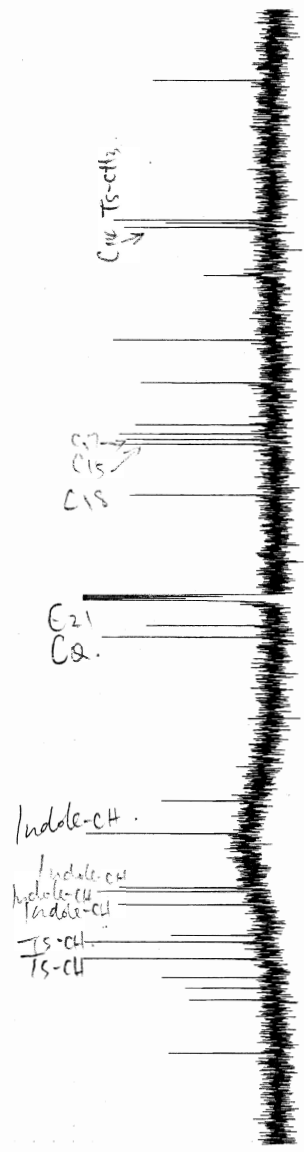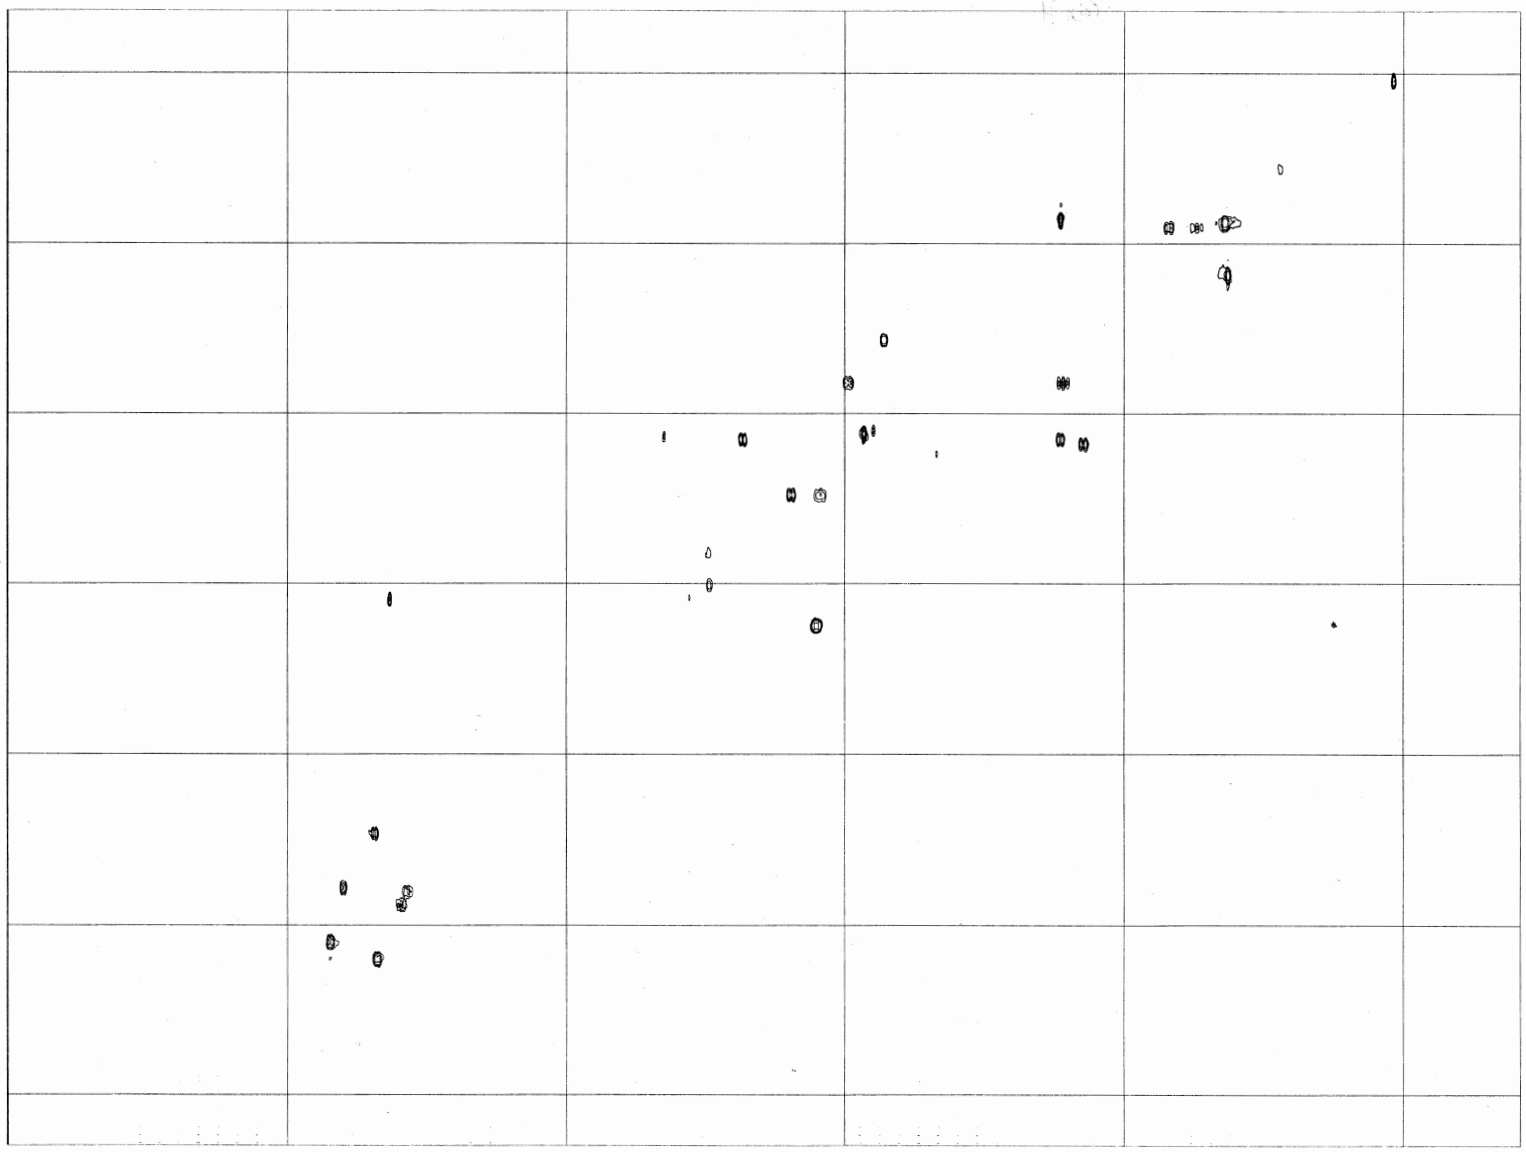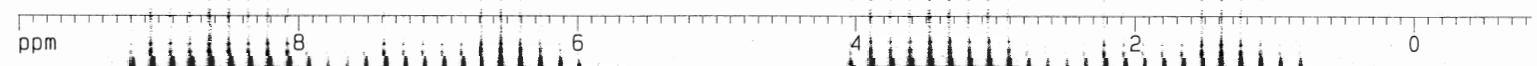

alt 894

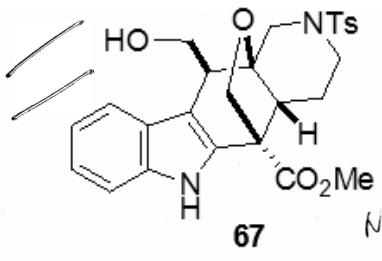

FYQ-II-096100101 HMBC

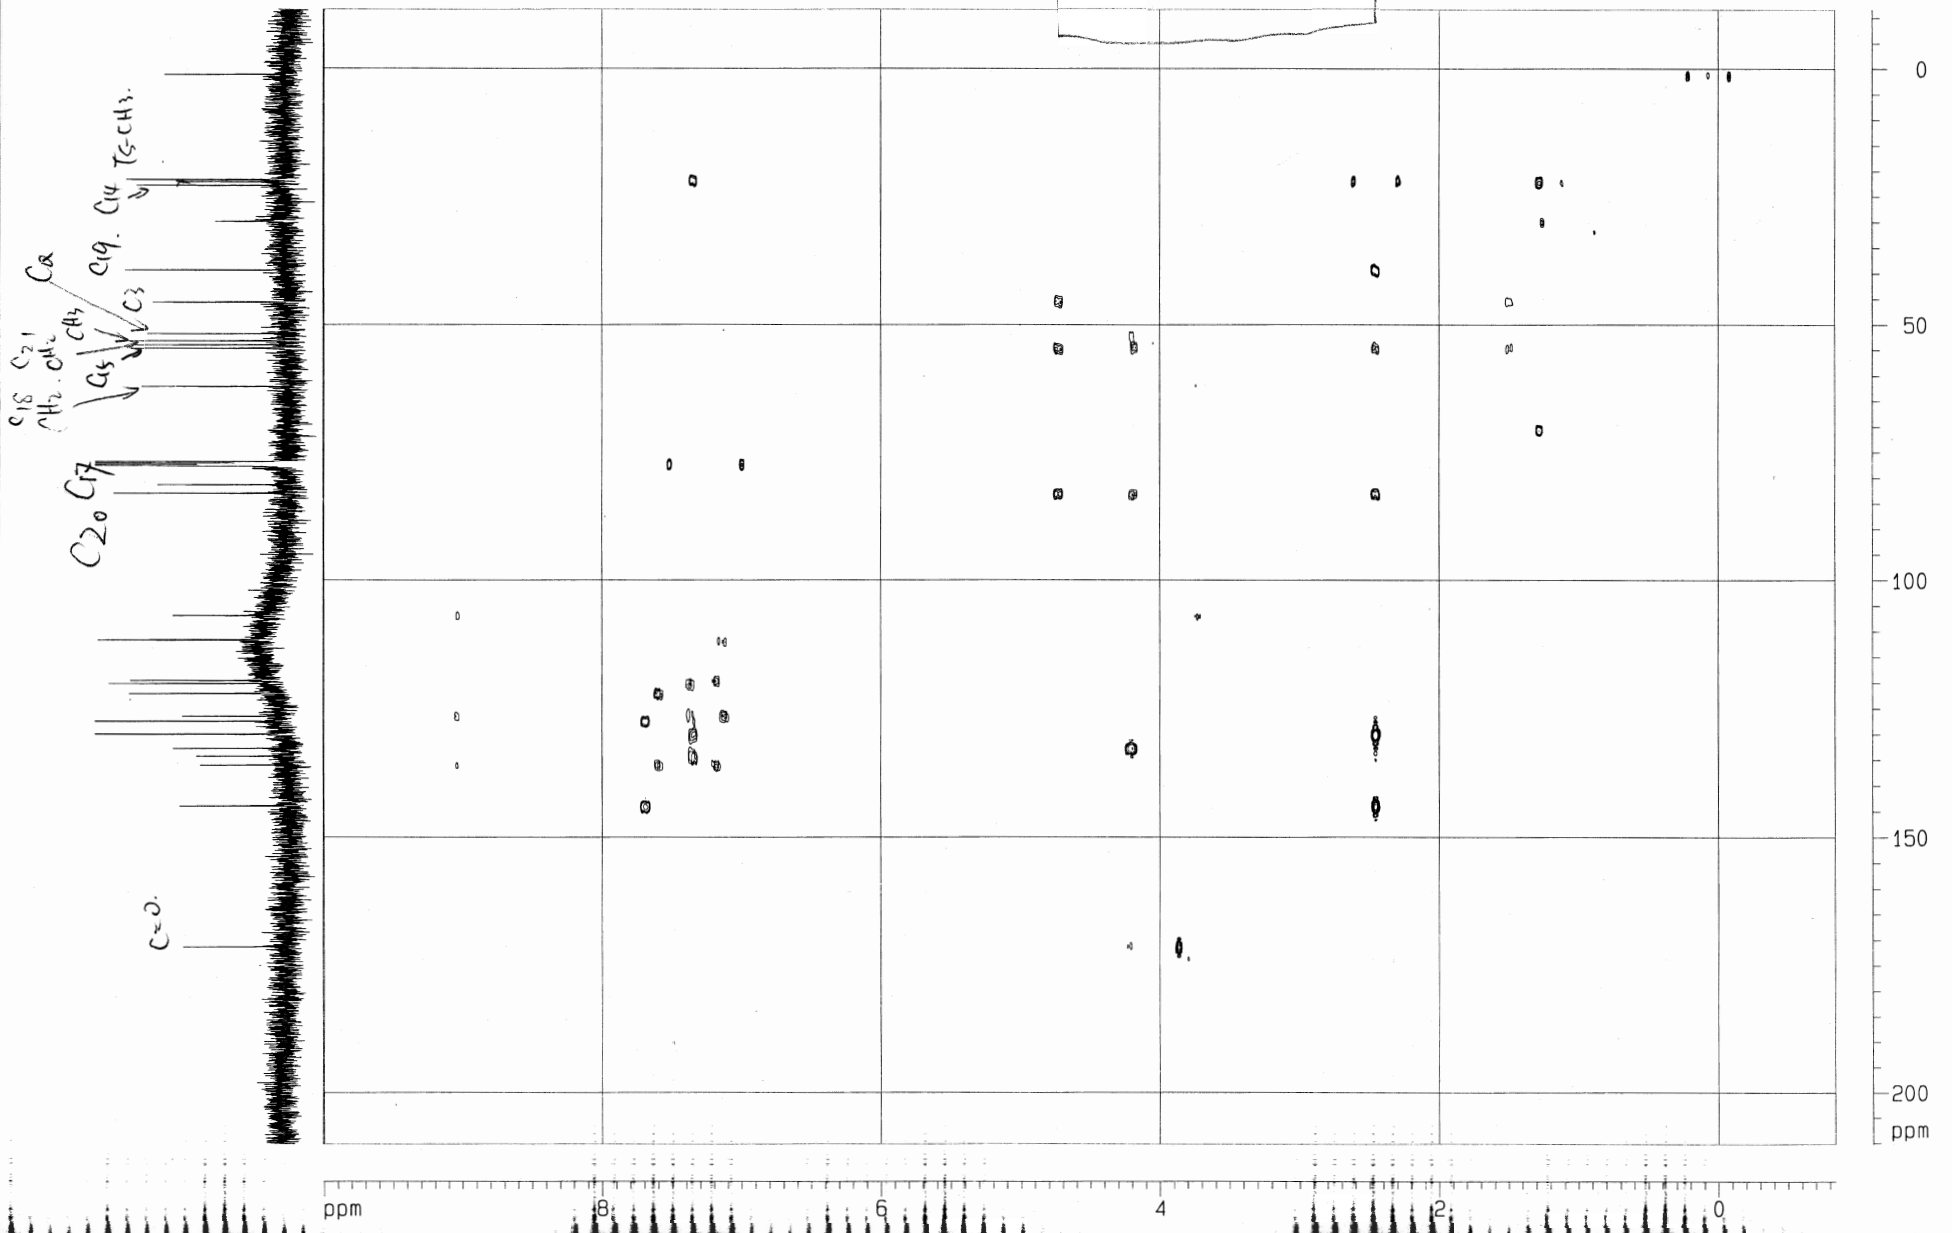

ppm 8 6 4 2 0

COSY (+)  
all.

S95

FYQ-II-096100101 COSY

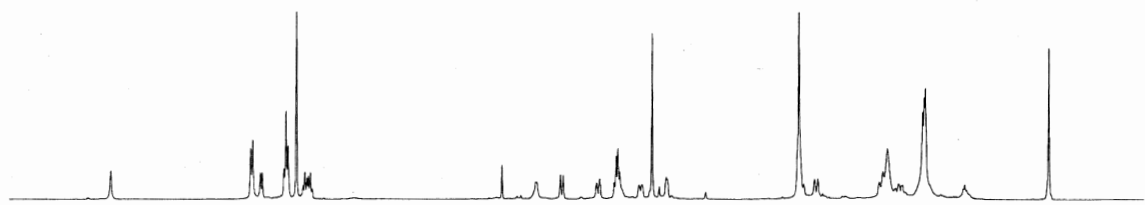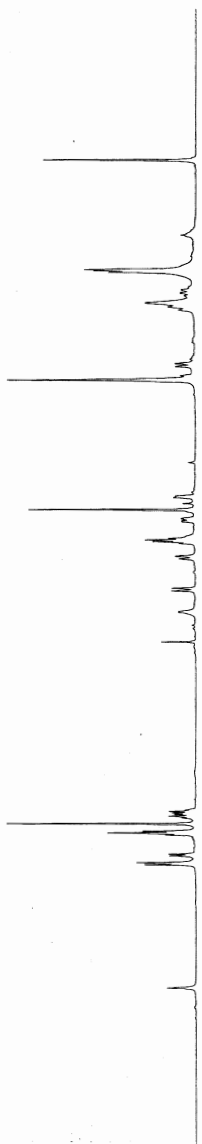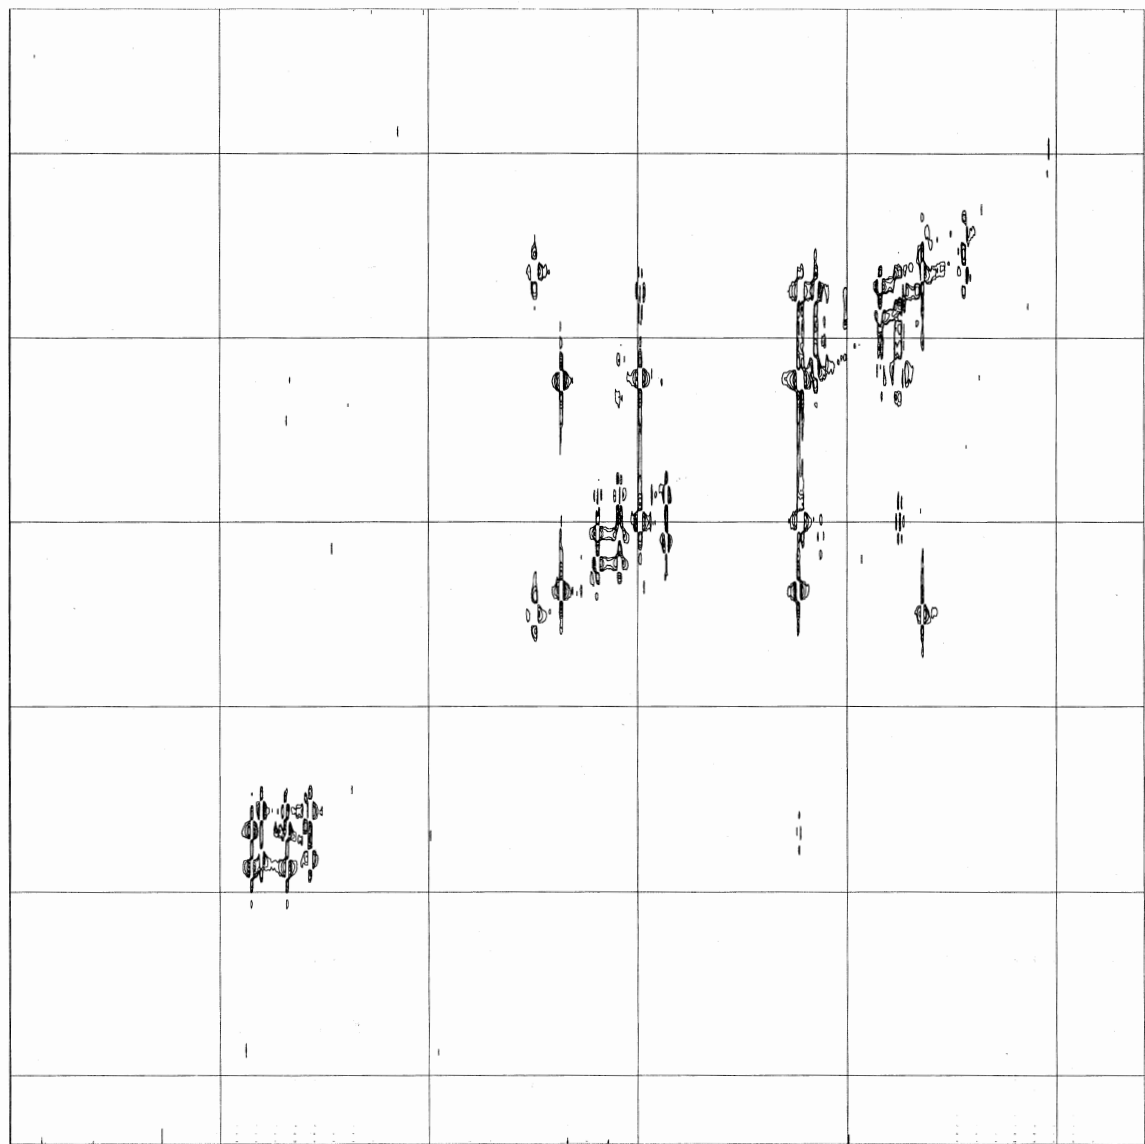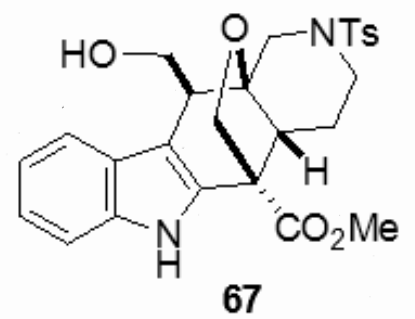

ppm 8 6 4 2 0

0 2 4 6 8 10 ppm

Zoom  
15 ppm

FYQ-II-096100101 NOESY

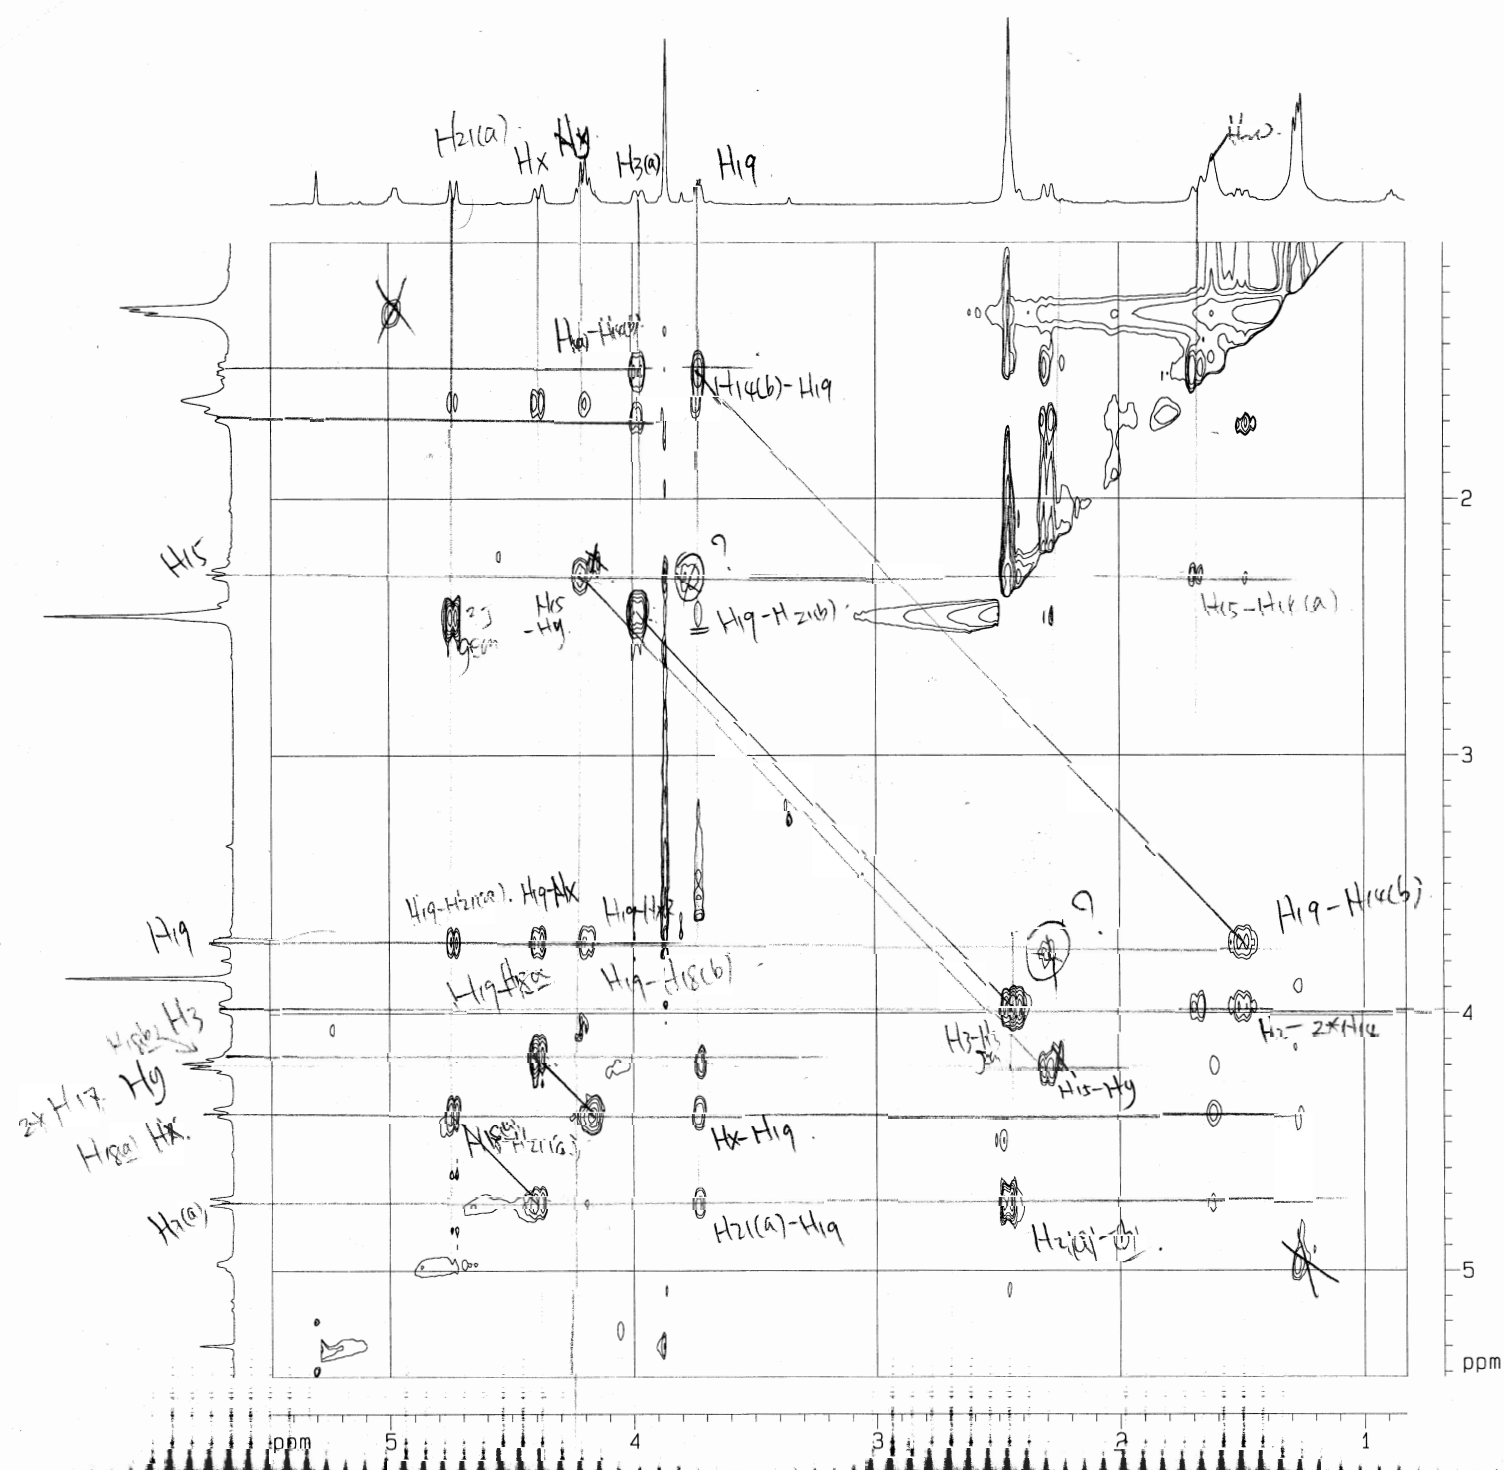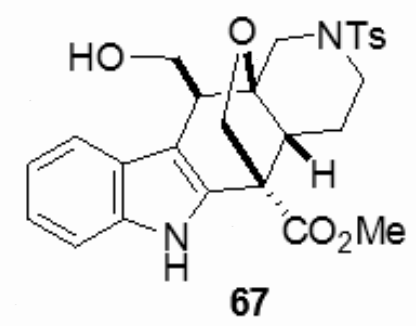

FYQ-II-106107 1H ns32

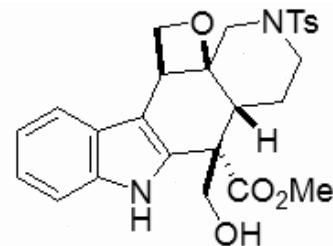

68

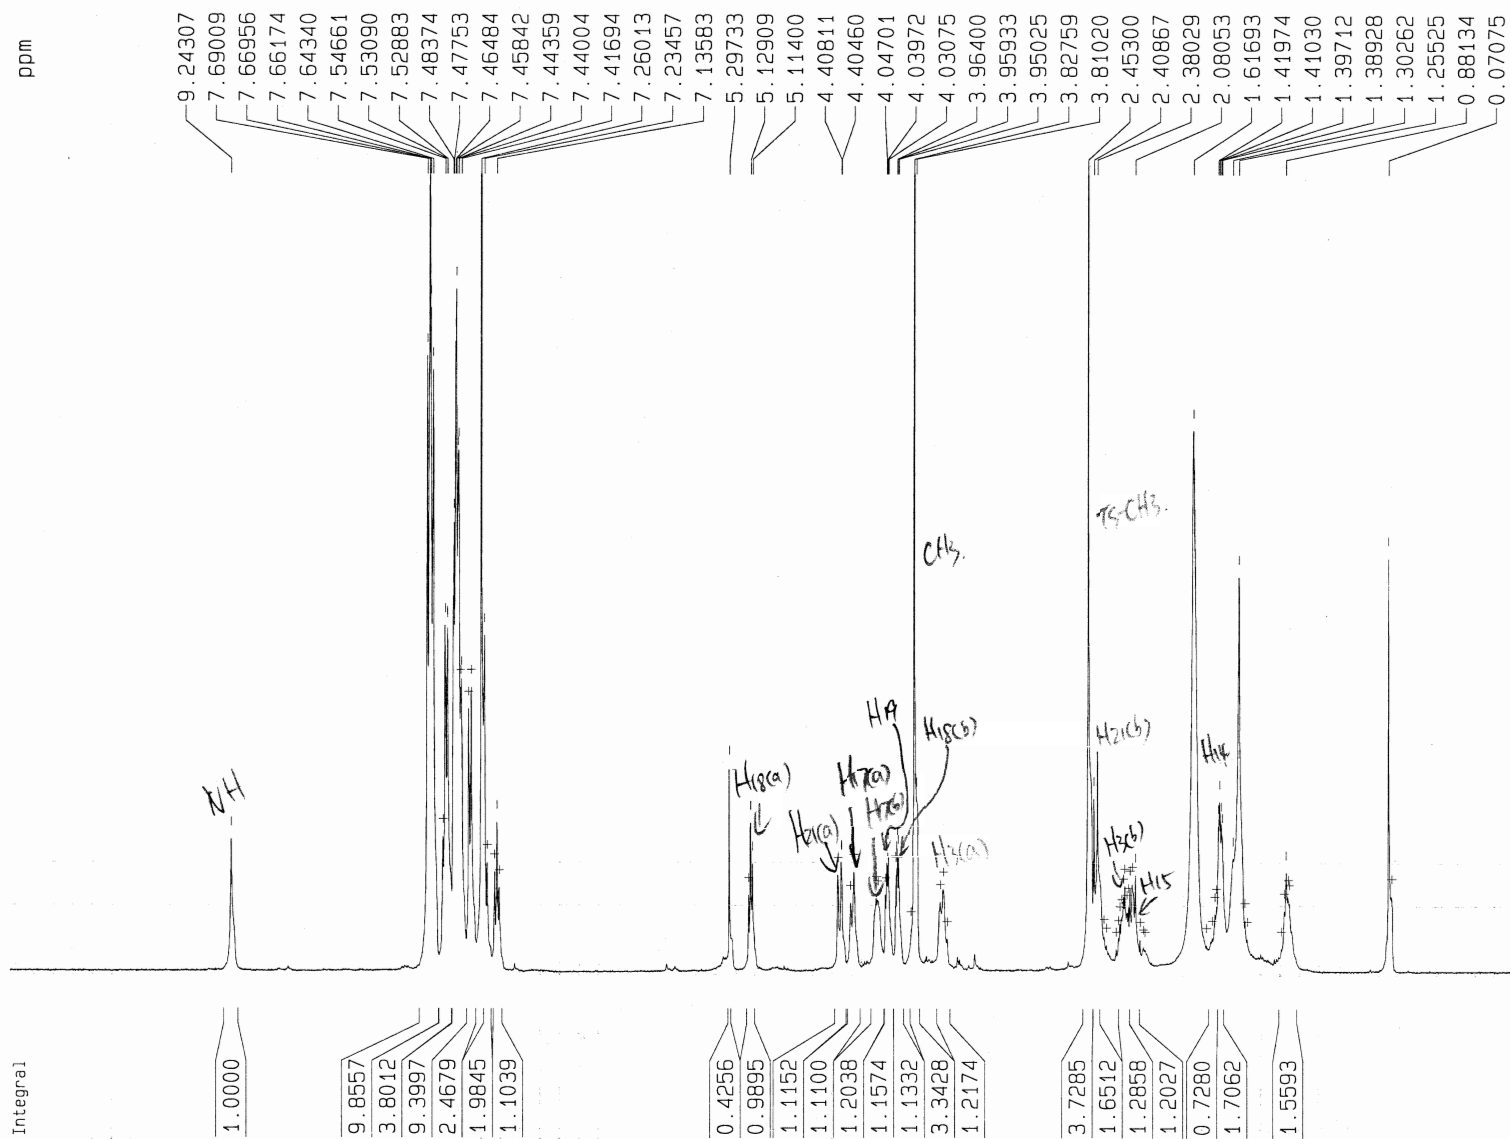

Current Data Parameters  
NAME 082911FJII-106  
EXPNO 2  
PROCNO 1

F2 - Acquisition Parameters  
Date\_ 20110829  
Time 18.38  
INSTRUM spect  
PROBHD 5 mm BBI 1H-  
PULPROG zg30  
TD 65536  
SOLVENT CDC13  
NS 32  
DS 2  
SWH 8278.146 Hz  
FIDRES 0.126314 Hz  
AQ 3.9584243 sec  
RG 322.5  
DW 60.400 usec  
DE 6.00 usec  
TE 300.0 K  
D1 1.00000000 sec

===== CHANNEL f1 =====  
NUC1 1H  
P1 6.45 usec  
PL1 0.00 dB  
SFO1 400.1324710 MHz

F2 - Processing parameters  
SI 32768  
SF 400.1300094 MHz  
WDW EM  
SSB 0  
LB 0.30 Hz  
GB 0  
PC 1.00

1D NMR plot parameters  
CX 20.00 cm  
F1P 11.000 ppm  
F1 4401.43 Hz  
F2P -1.000 ppm  
F2 -400.13 Hz  
PPMCM 0.60000 ppm/cm  
HZCM 240.07800 Hz/cm

FYQ-II-106107 C13 ns11k

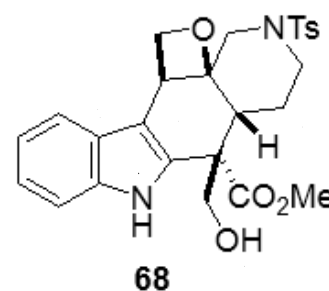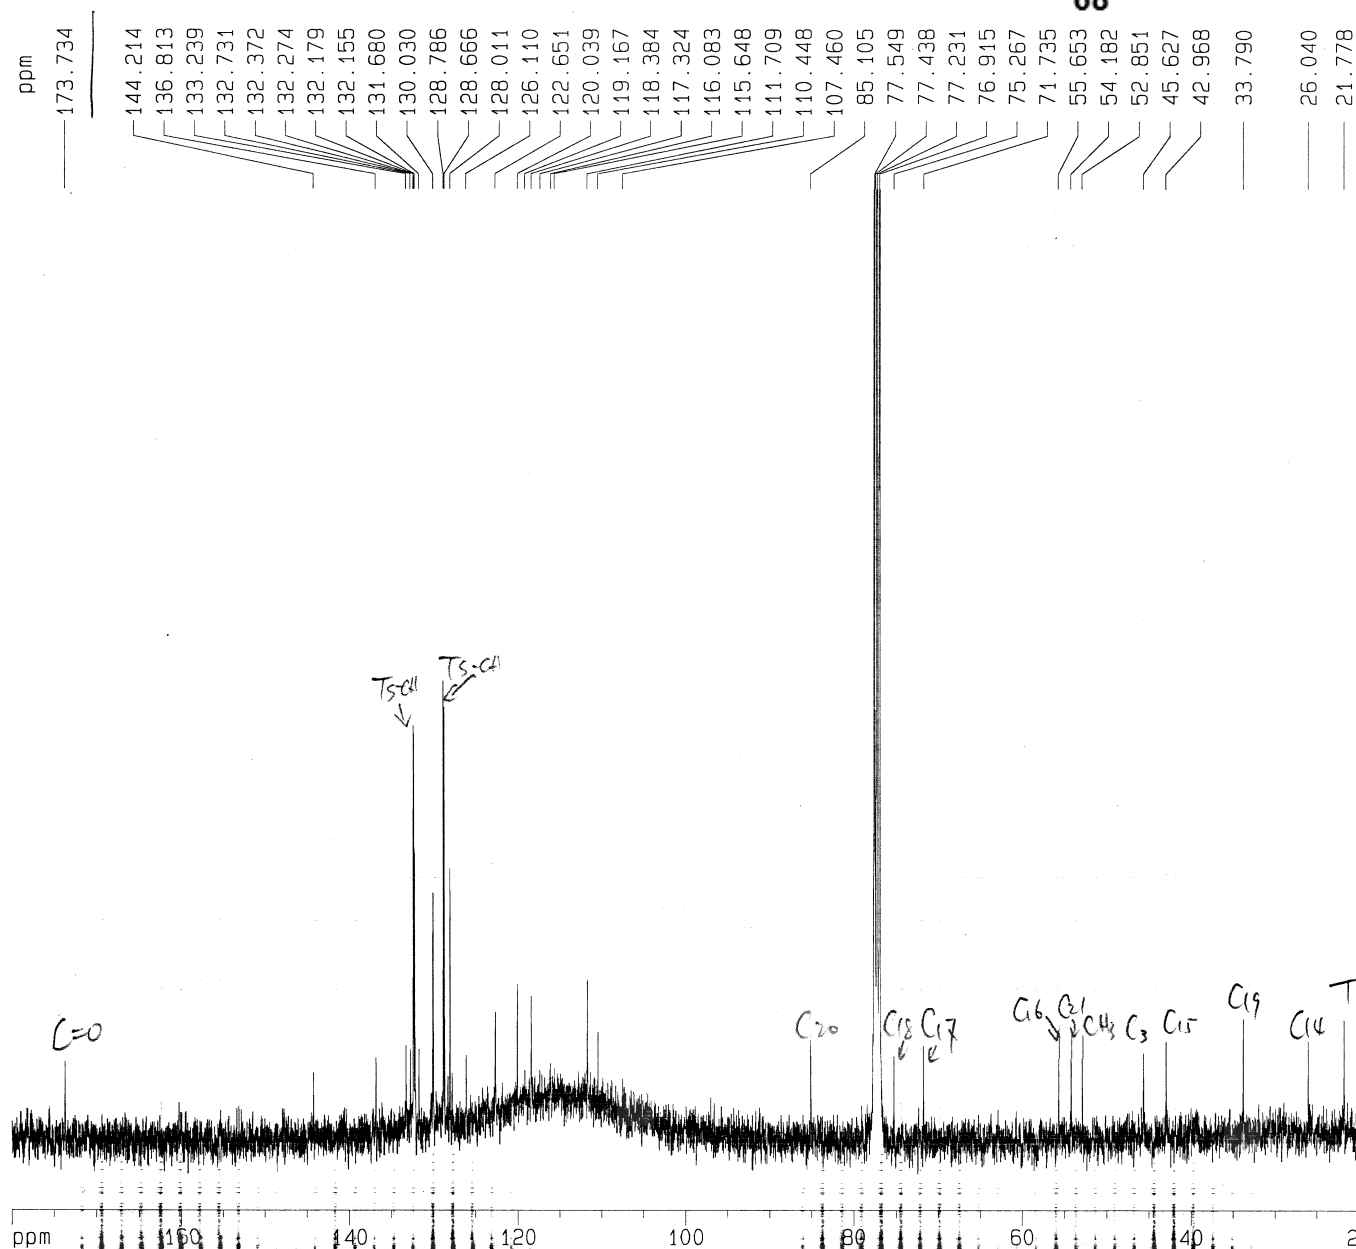

Current Data Parameters  
 NAME 082911FJII-106  
 EXPNO 7  
 PROCNO 1

F2 - Acquisition Parameters  
 Date\_ 20110830  
 Time 9.48  
 INSTRUM spect  
 PROBHD 5 mm BBI 1H-  
 PULPROG zgpg30  
 TD 65536  
 SOLVENT CDC13  
 NS 11264  
 DS 4  
 SWH 25125.629 Hz  
 FIDRES 0.383387 Hz  
 AQ 1.3042164 sec  
 RG 8192  
 DW 19.900 usec  
 DE 6.00 usec  
 TE 300.0 K  
 D1 2.0000000 sec  
 d11 0.0300000 sec  
 d12 0.0000200 sec

===== CHANNEL f1 =====  
 NUC1 13C  
 P1 16.35 usec  
 PL1 -6.00 dB  
 SF01 100.6237959 MHz

===== CHANNEL f2 =====  
 CPDPRG2 waltz16  
 NUC2 1H  
 PCPD2 114.00 usec  
 PL2 0.00 dB  
 PL12 24.00 dB  
 PL13 24.00 dB  
 SF02 400.1316005 MHz

F2 - Processing parameters  
 SI 32768  
 SF 100.6127476 MHz  
 WDW EM  
 SSB 0  
 LB 1.00 Hz  
 GB 0  
 PC 1.40

1D NMR plot parameters  
 CX 20.00 cm  
 F1P 180.000 ppm  
 F1 18110.29 Hz  
 F2P 0.000 ppm  
 F2 0.00 Hz  
 PPMCM 9.00000 ppm/cm  
 IZCM 805.51171 Hz/cm

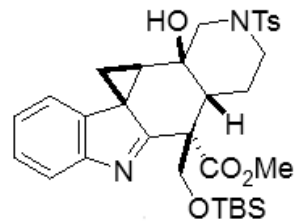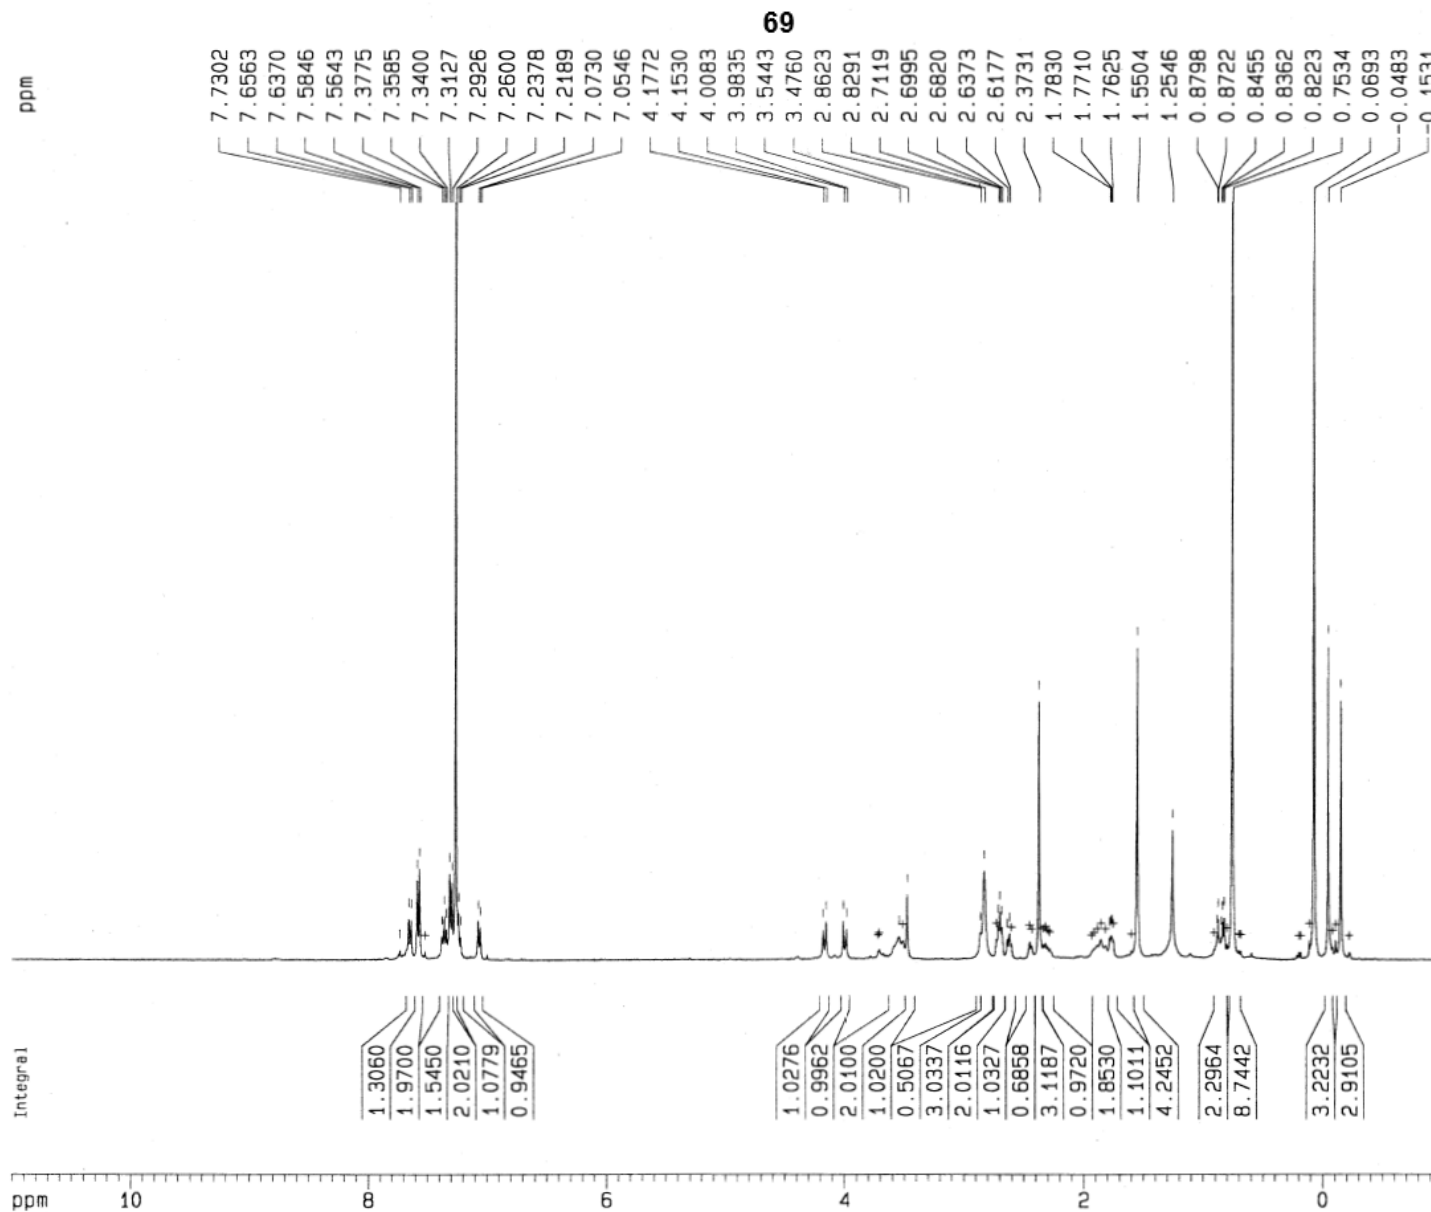

## Current Data Parameters

NAME 101312FJ-AgBF4  
EXPNO 1  
PROCNO 1

## F2 - Acquisition Parameters

Date\_ 20121013  
Time 12.31  
INSTRUM spect  
PROBHD 5 mm BBI 1H-  
PULPROG zg30  
TD 65536  
SOLVENT CDCl3  
NS 24  
DS 2  
SWH 8278.146 Hz  
FIDRES 0.126314 Hz  
AQ 3.9584243 sec  
RG 812.7  
DW 60.400 usec  
DE 6.00 usec  
TE 300.0 K  
D1 1.00000000 sec

## ===== CHANNEL f1 =====

NUC1 1H  
P1 6.45 usec  
PL1 0.00 dB  
SF01 400.1324710 MHz

## F2 - Processing parameters

SI 32768  
SF 400.1300091 MHz  
WDW EM  
SSB 0  
LB 0.30 Hz  
GB 0  
PC 1.00

## 1D NMR plot parameters

CX 20.00 cm  
F1P 11.000 ppm  
F1 4401.43 Hz  
F2P -1.000 ppm  
F2 -400.13 Hz  
PPMCM 0.60000 ppm/cm  
HZCM 240.07800 Hz/cm



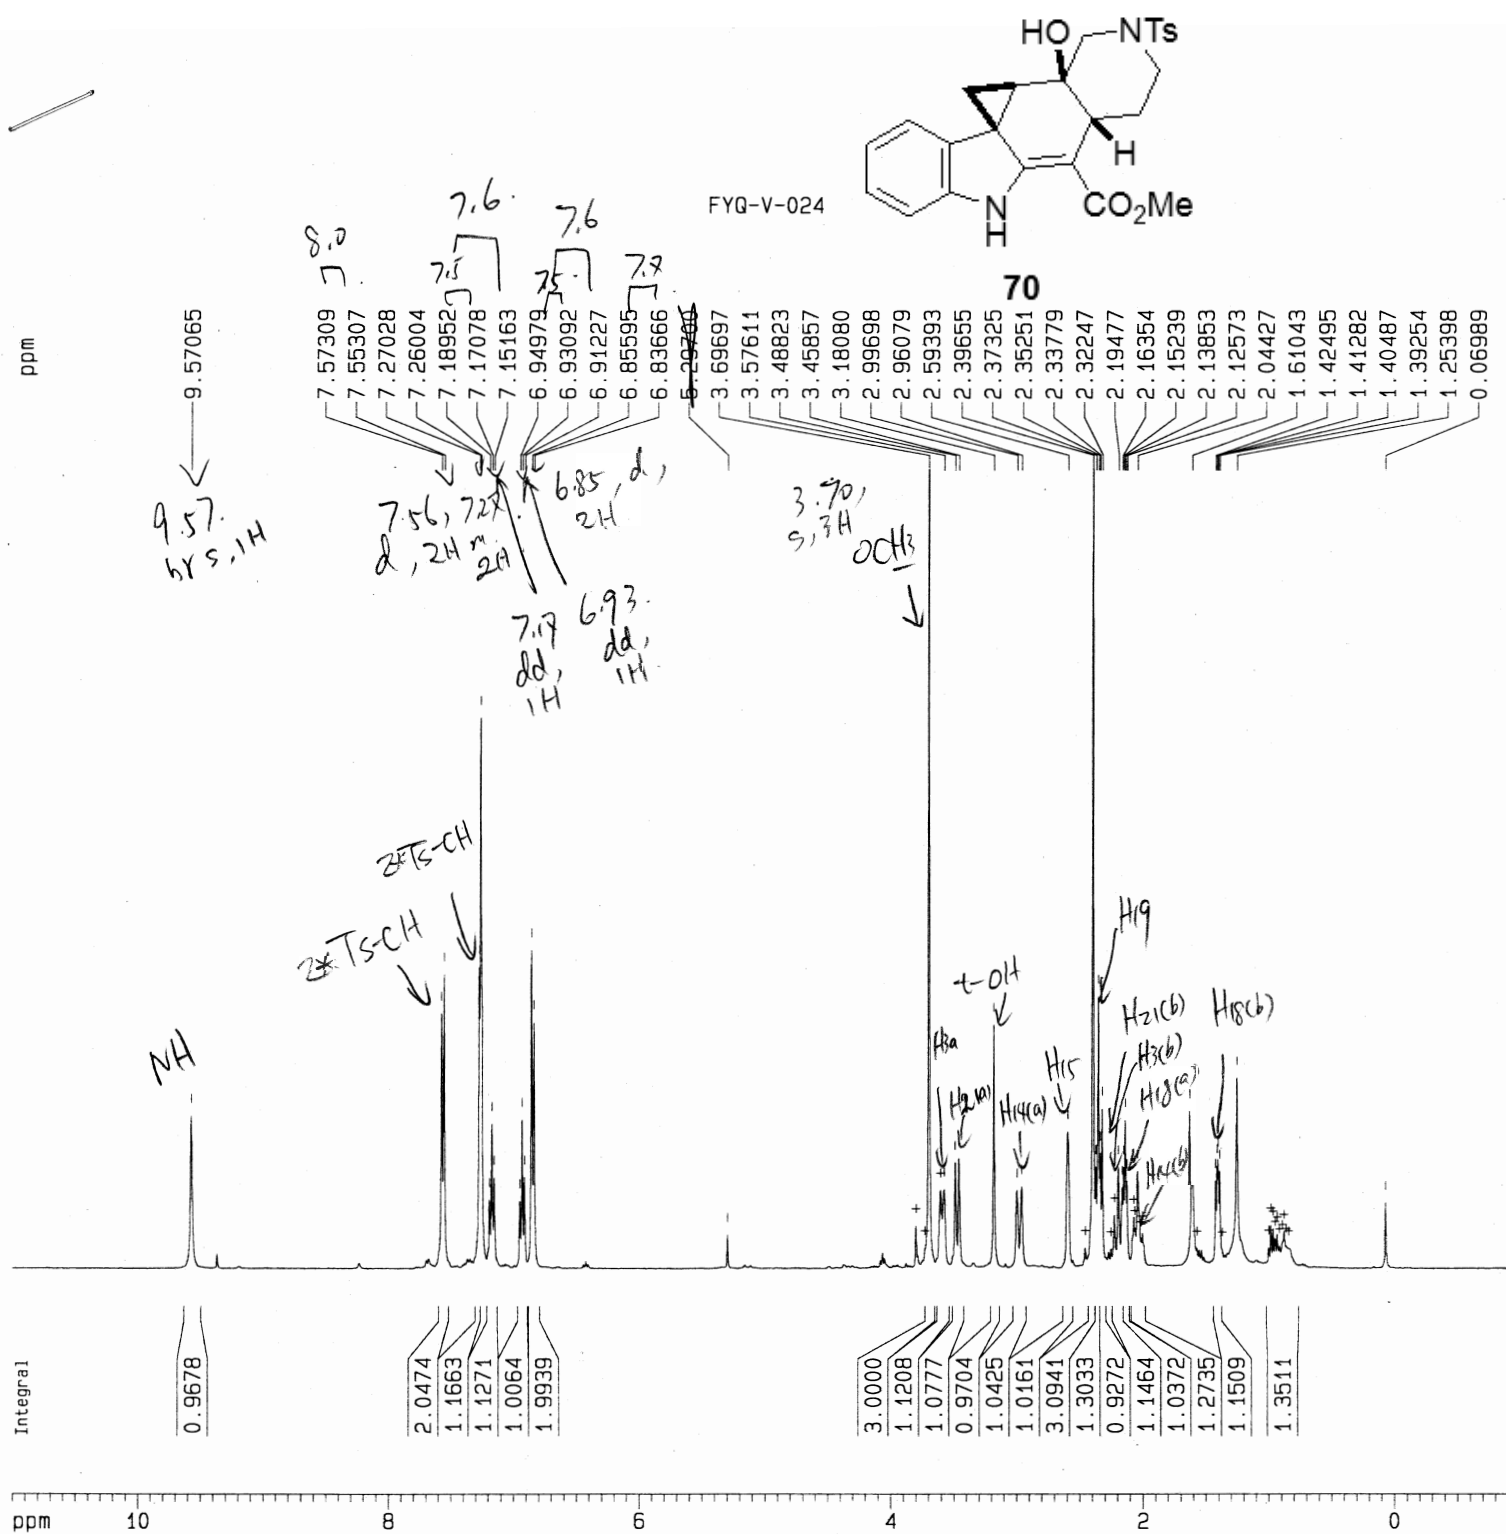

Current Data Parameters  
 NAME 102112FJV-024  
 EXPNO 2  
 PROCNO 1

F2 - Acquisition Parameters  
 Date\_ 20121021  
 Time 13.41  
 INSTRUM spect  
 PROBHD 5 mm BBI 1H-  
 PULPROG zg30  
 TD 65536  
 SOLVENT CDC13  
 NS 16  
 DS 2  
 SWH 8278.146 Hz  
 FIDRES 0.126314 Hz  
 AQ 3.9584243 sec  
 RG 203.2  
 DW 60.400 usec  
 DE 6.00 usec  
 TE 300.0 K  
 D1 1.00000000 sec

===== CHANNEL f1 =====  
 NUC1 1H  
 P1 6.45 usec  
 PL1 0.00 dB  
 SFO1 400.1324710 MHz

F2 - Processing parameters  
 SI 32768  
 SF 400.1300091 MHz  
 WDW EM  
 SSB 0  
 LB 0.30 Hz  
 GB 0  
 PC 1.00

1D NMR plot parameters  
 CX 20.00 cm  
 F1P 11.000 ppm  
 F1 4401.43 Hz  
 F2P -1.000 ppm  
 F2 -400.13 Hz  
 PPMCM 0.60000 ppm/cm  
 HZCM 240.07800 Hz/cm

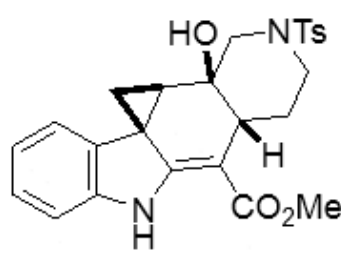

70

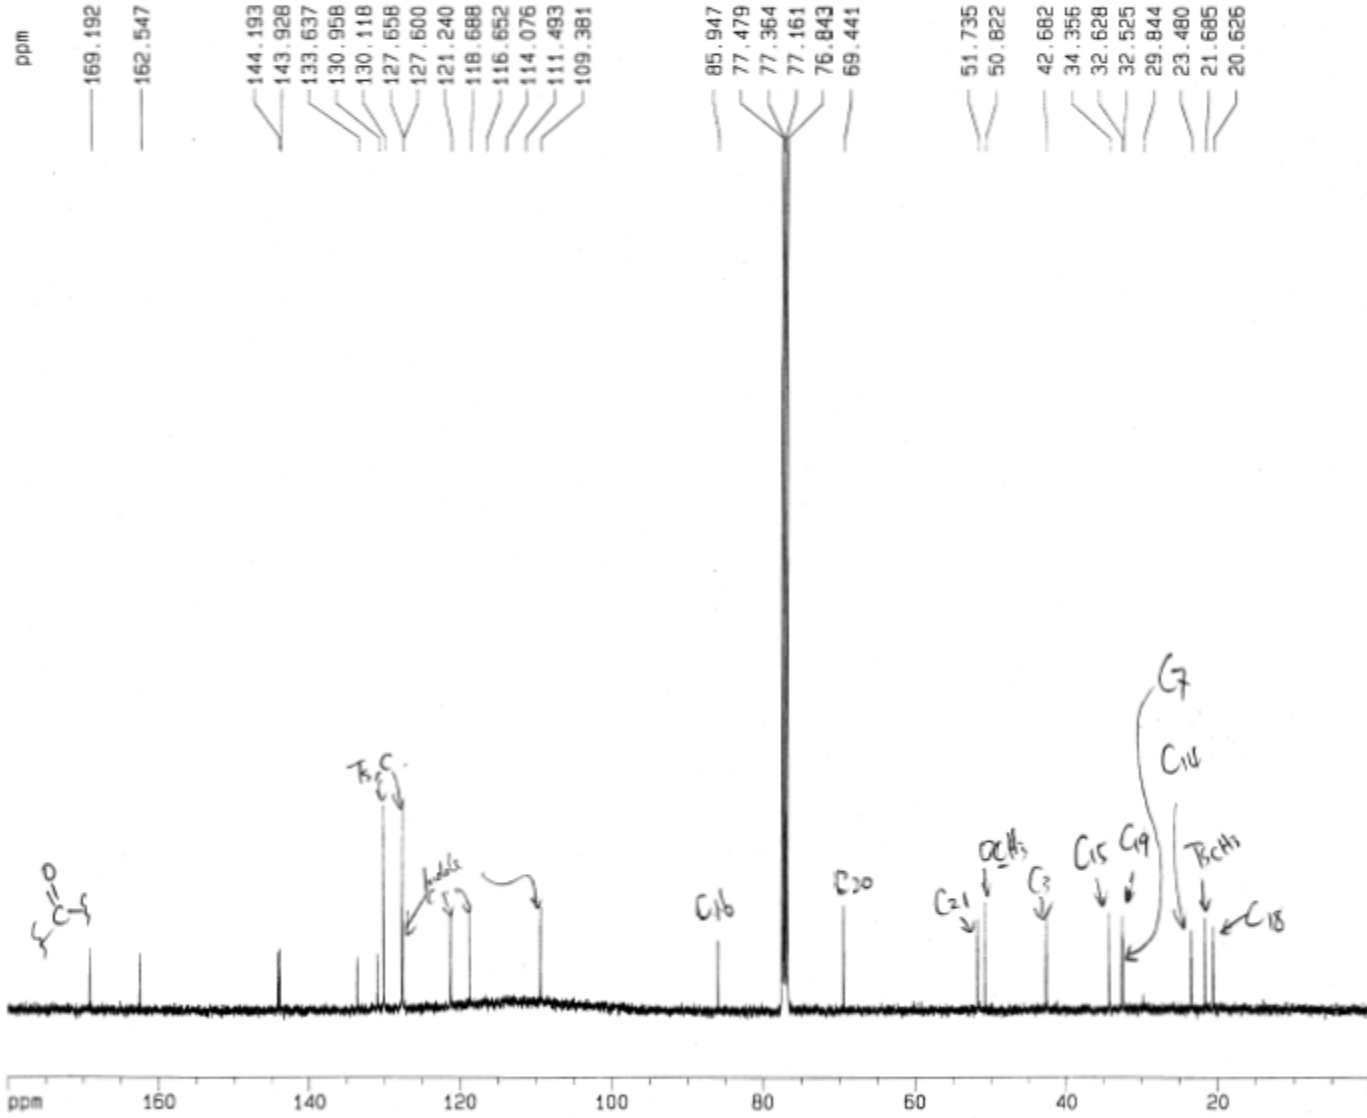

Current Data Parameters  
 NAME 102112FJV-024  
 EXPNO 7  
 PROCNO 1

F2 - Acquisition Parameters  
 Date\_ 20121022  
 Time 2.59  
 INSTRUM spect  
 PROBHD 5 mm BBI 1H-  
 PULPROG zgpg30  
 TD 65536  
 SOLVENT CDCl3  
 NS 9216  
 DS 4  
 SMH 25125.629 Hz  
 FIDRES 0.383387 Hz  
 AQ 1.3042164 sec  
 RG 16384  
 DW 19.900 usec  
 DE 6.00 usec  
 TE 300.0 K  
 O1 2.0000000 sec  
 d11 0.0300000 sec  
 d12 0.00002000 sec

----- CHANNEL f1 -----  
 NUC1 13C  
 P1 16.35 usec  
 PL1 -6.00 dB  
 SFO1 100.6237959 MHz

----- CHANNEL f2 -----  
 CPDPRG2 waltz16  
 NUC2 1H  
 PCPD2 114.00 usec  
 PL2 0.00 dB  
 PL12 24.00 dB  
 PL13 24.00 dB  
 SFO2 400.1316005 MHz

F2 - Processing parameters  
 SI 32768  
 SF 100.6127554 MHz  
 MON EM  
 SSB 0  
 LB 1.00 Hz  
 GB 0  
 PC 1.40

1D NMR plot parameters  
 CX 20.00 cm  
 F1P 180.000 ppm  
 F1 18110.29 Hz  
 F2P 0.000 ppm  
 F2 0.00 Hz  
 PPMCM 9.00000 ppm/cm  
 HZCM 905.51477 Hz/cm

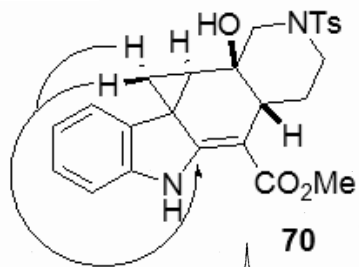

Key HMBC  
correlations  
for 70

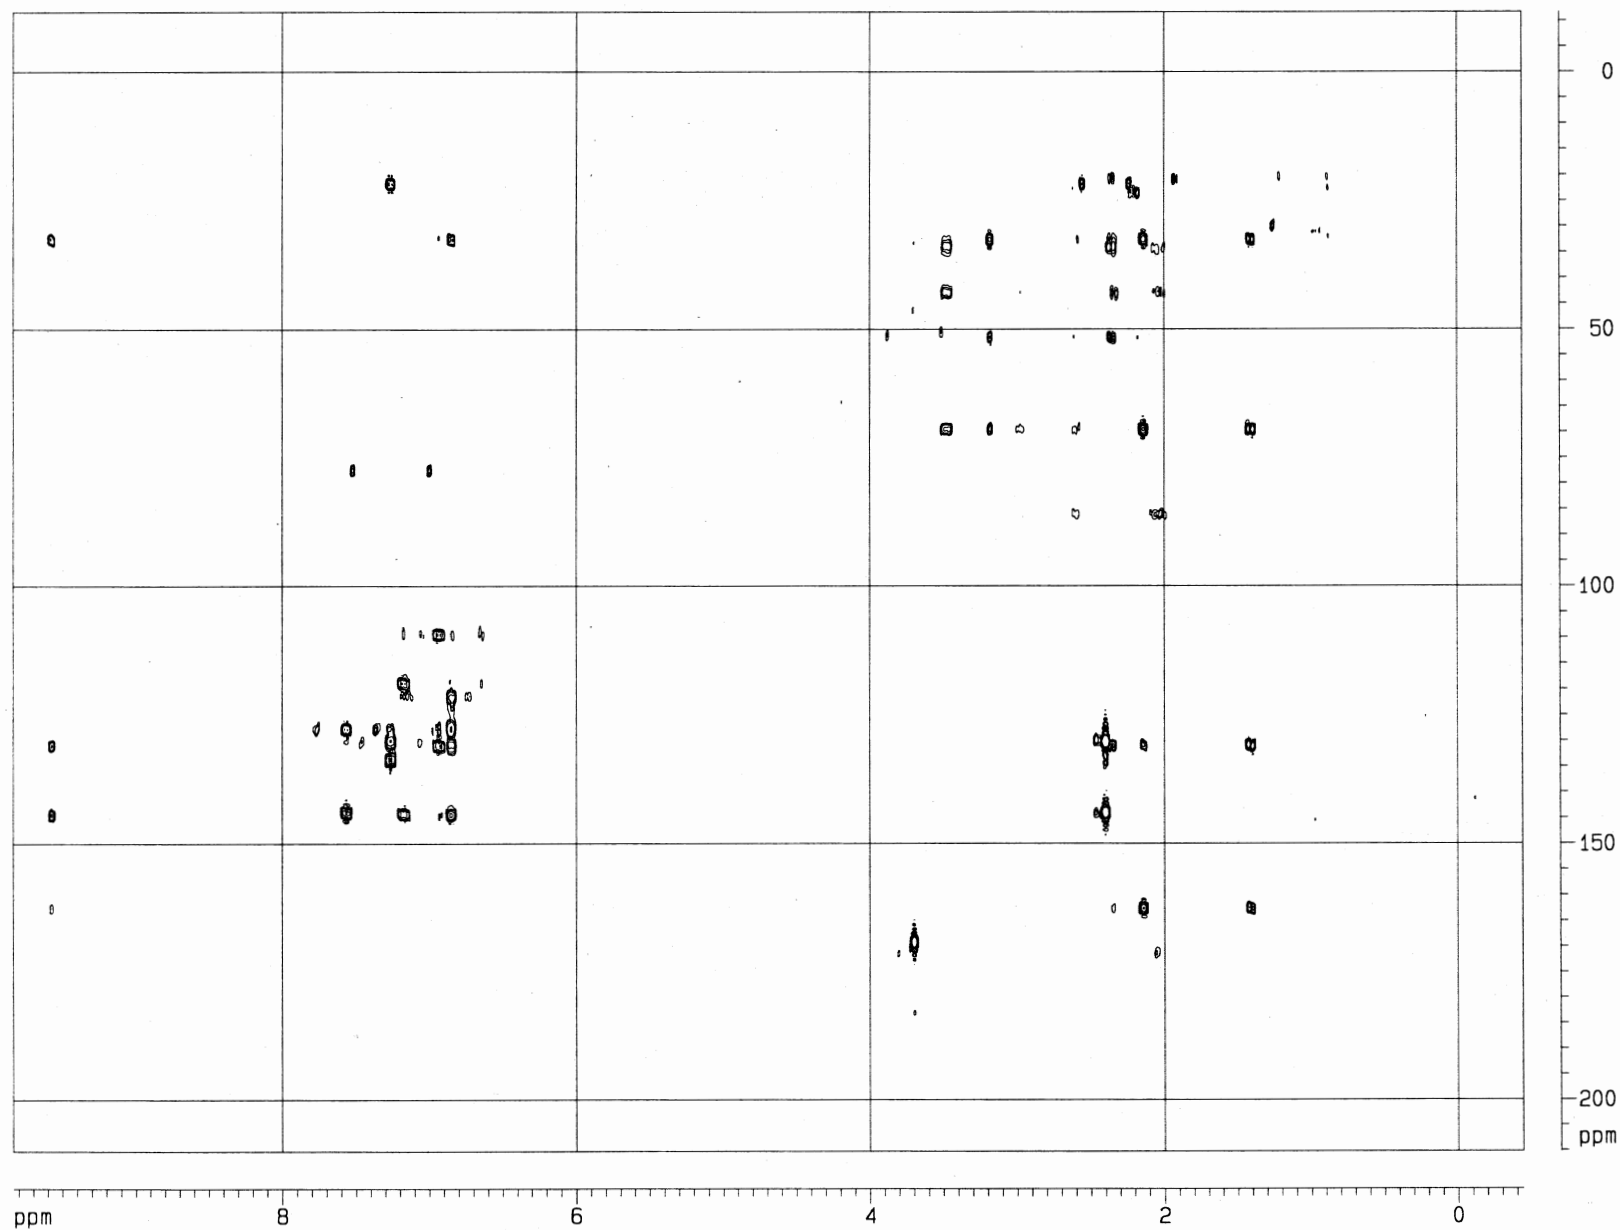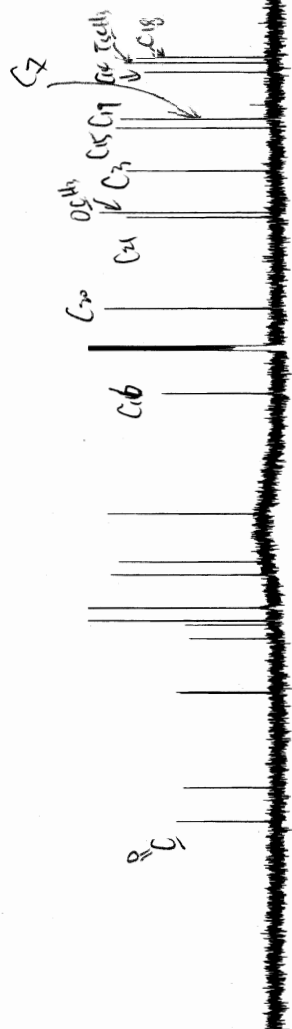

FYQ-V-053

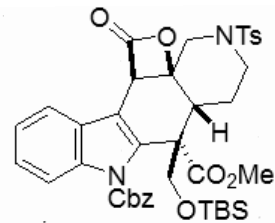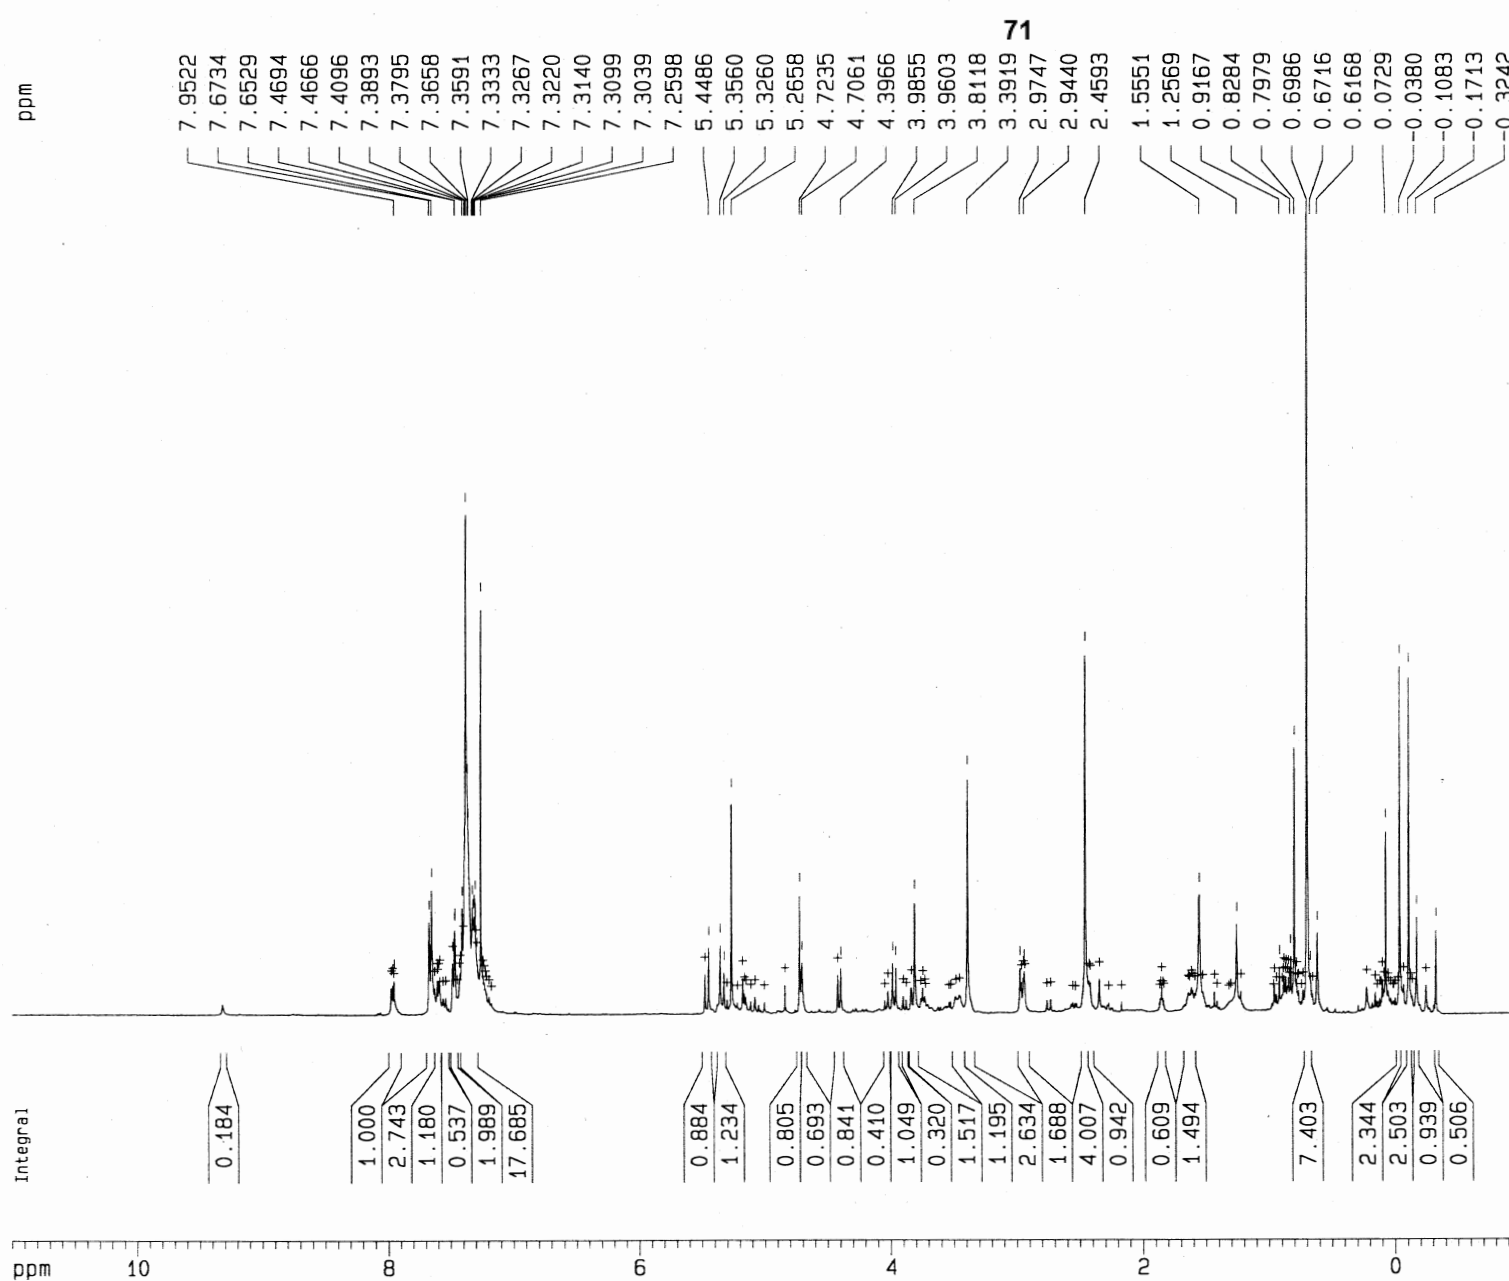

Current Data Parameters  
NAME 111612FJV-053  
EXPNO 1  
PROCNO 1

F2 - Acquisition Parameters  
Date\_ 20121116  
Time 10.37  
INSTRUM spect  
PROBHD 5 mm BBI 1H-  
PULPROG zg30  
TD 65536  
SOLVENT CDC13  
NS 16  
DS 2  
SWH 8278.146 Hz  
FIDRES 0.126314 Hz  
AQ 3.9584243 sec  
RG 322.5  
DW 60.400 usec  
DE 6.00 usec  
TE 300.0 K  
D1 1.00000000 sec

===== CHANNEL f1 =====  
NUC1 1H  
P1 6.45 usec  
PL1 0.00 dB  
SFO1 400.1324710 MHz

F2 - Processing parameters  
SI 32768  
SF 400.1300094 MHz  
WDW EM  
SSB 0  
LB 0.30 Hz  
GB 0  
PC 1.00

1D NMR plot parameters  
CX 20.00 cm  
F1P 11.000 ppm  
F1 4401.43 Hz  
F2P -1.000 ppm  
F2 -400.13 Hz  
PPMCM 0.60000 ppm/cm  
HZCM 240.07800 Hz/cm

FYQ-V-055 pure

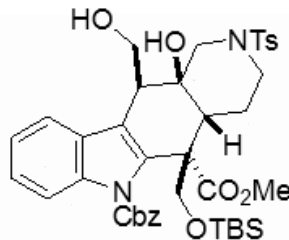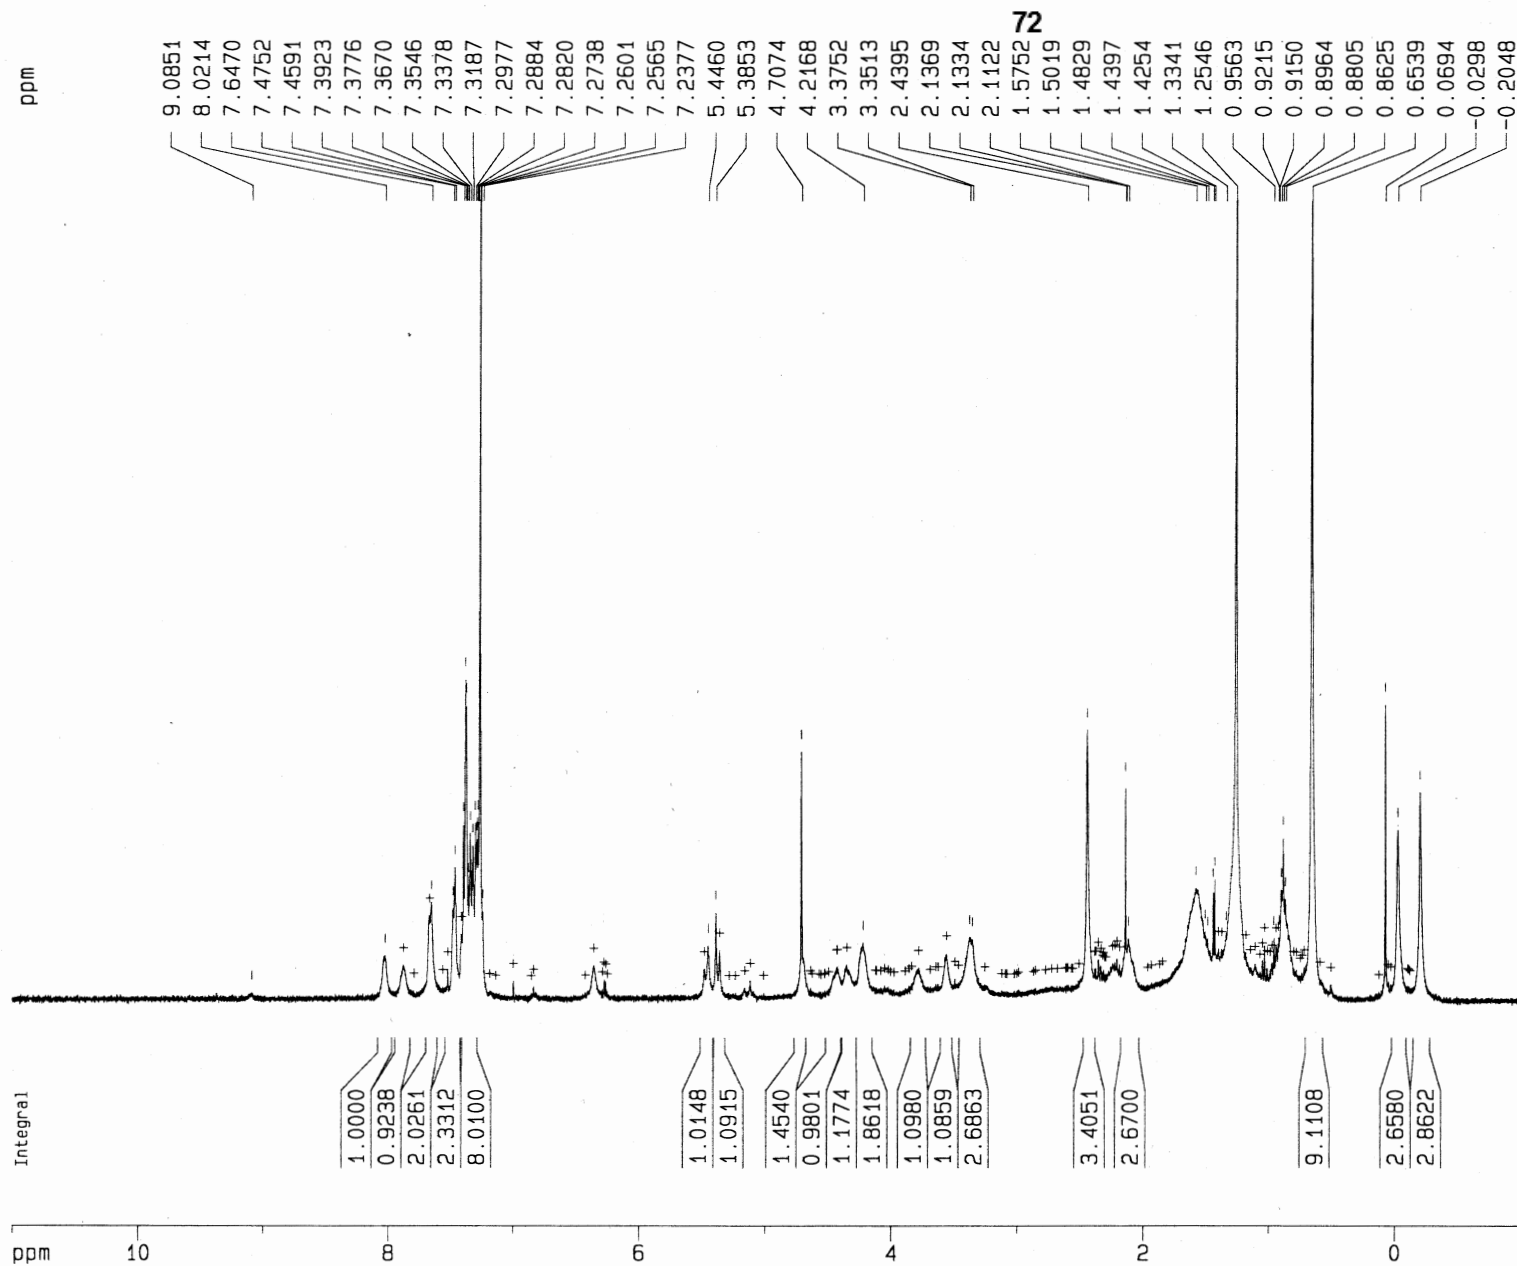

Current Data Parameters  
NAME 111612FJV-055  
EXPNO 2  
PROCNO 1

F2 - Acquisition Parameters  
Date\_ 20121116  
Time 14.24  
INSTRUM spect  
PROBHD 5 mm BBI 1H-  
PULPROG zg30  
TD 65536  
SOLVENT CDC13  
NS 48  
DS 2  
SWH 8278.146 Hz  
FIDRES 0.126314 Hz  
AQ 3.9584243 sec  
RG 645.1  
DW 60.400 usec  
DE 6.00 usec  
TE 300.0 K  
D1 1.00000000 sec

===== CHANNEL f1 =====  
NUC1 1H  
P1 6.45 usec  
PL1 0.00 dB  
SF01 400.1324710 MHz

F2 - Processing parameters  
SI 32768  
SF 400.1300094 MHz  
WDW no  
SSB 0  
LB 0.00 Hz  
GB 0  
PC 1.00

1D NMR plot parameters  
CX 20.00 cm  
F1P 11.000 ppm  
F1 4401.43 Hz  
F2P -1.000 ppm  
F2 -400.13 Hz  
PPMCM 0.60000 ppm/cm  
HZCM 240.07802 Hz/cm

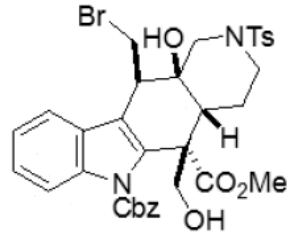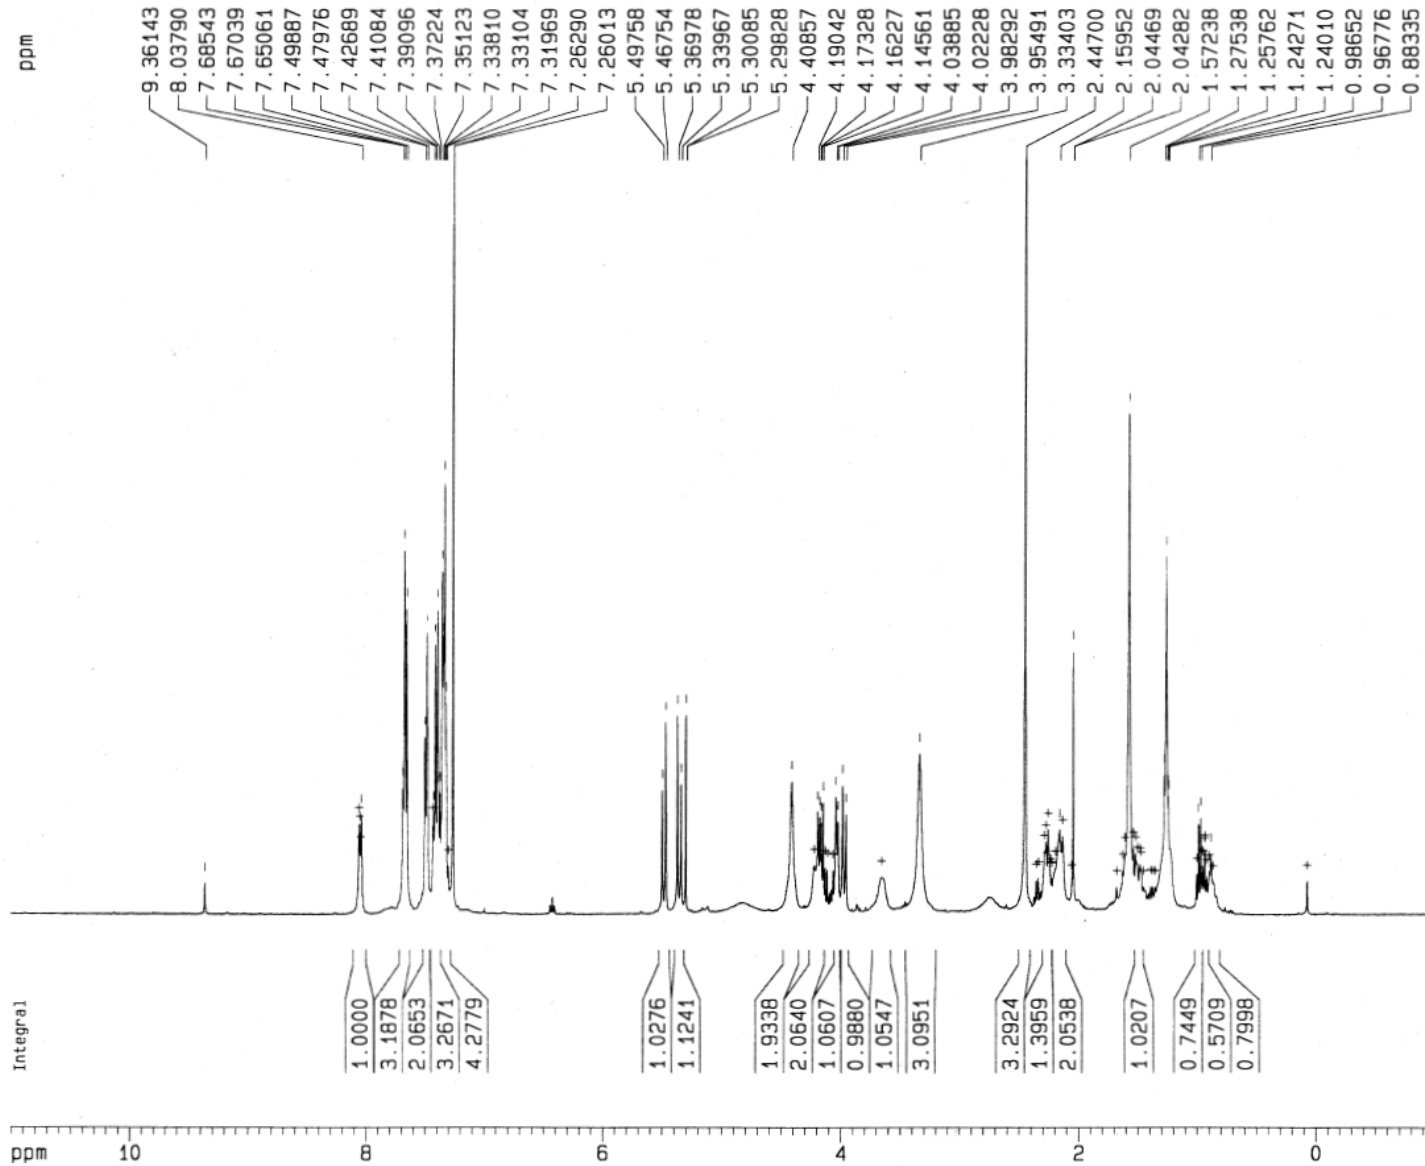

Current Data Parameters  
 NAME 120812FJV-0698  
 EXPNO 1  
 PROCNO 1

F2 - Acquisition Parameters  
 Date\_ 20121208  
 Time 17.34  
 INSTRUM spect  
 PROBHD 5 mm BBI 1H-  
 PULPROG zg30  
 TD 65536  
 SOLVENT CDCl3  
 NS 16  
 DS 2  
 SWH 8278.146 Hz  
 FIDRES 0.126314 Hz  
 AQ 3.9584243 sec  
 RG 287.4  
 DW 60.400 usec  
 DE 6.00 usec  
 TE 300.0 K  
 D1 1.00000000 sec

===== CHANNEL f1 =====  
 NUC1 1H  
 P1 6.45 usec  
 PL1 0.00 dB  
 SFO1 400.1324710 MHz

F2 - Processing parameters  
 SI 32768  
 SF 400.1300086 MHz  
 WDW EM  
 SSB 0  
 LB 0.30 Hz  
 GB 0  
 PC 1.00

1D NMR plot parameters  
 CX 20.00 cm  
 F1P 11.000 ppm  
 F1 4401.43 Hz  
 F2P -1.000 ppm  
 F2 -400.13 Hz  
 PPMCM 0.60000 ppm/cm  
 HZCM 240.07800 Hz/cm

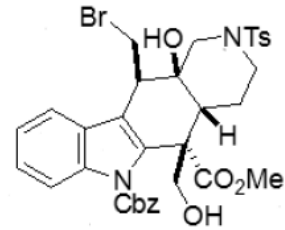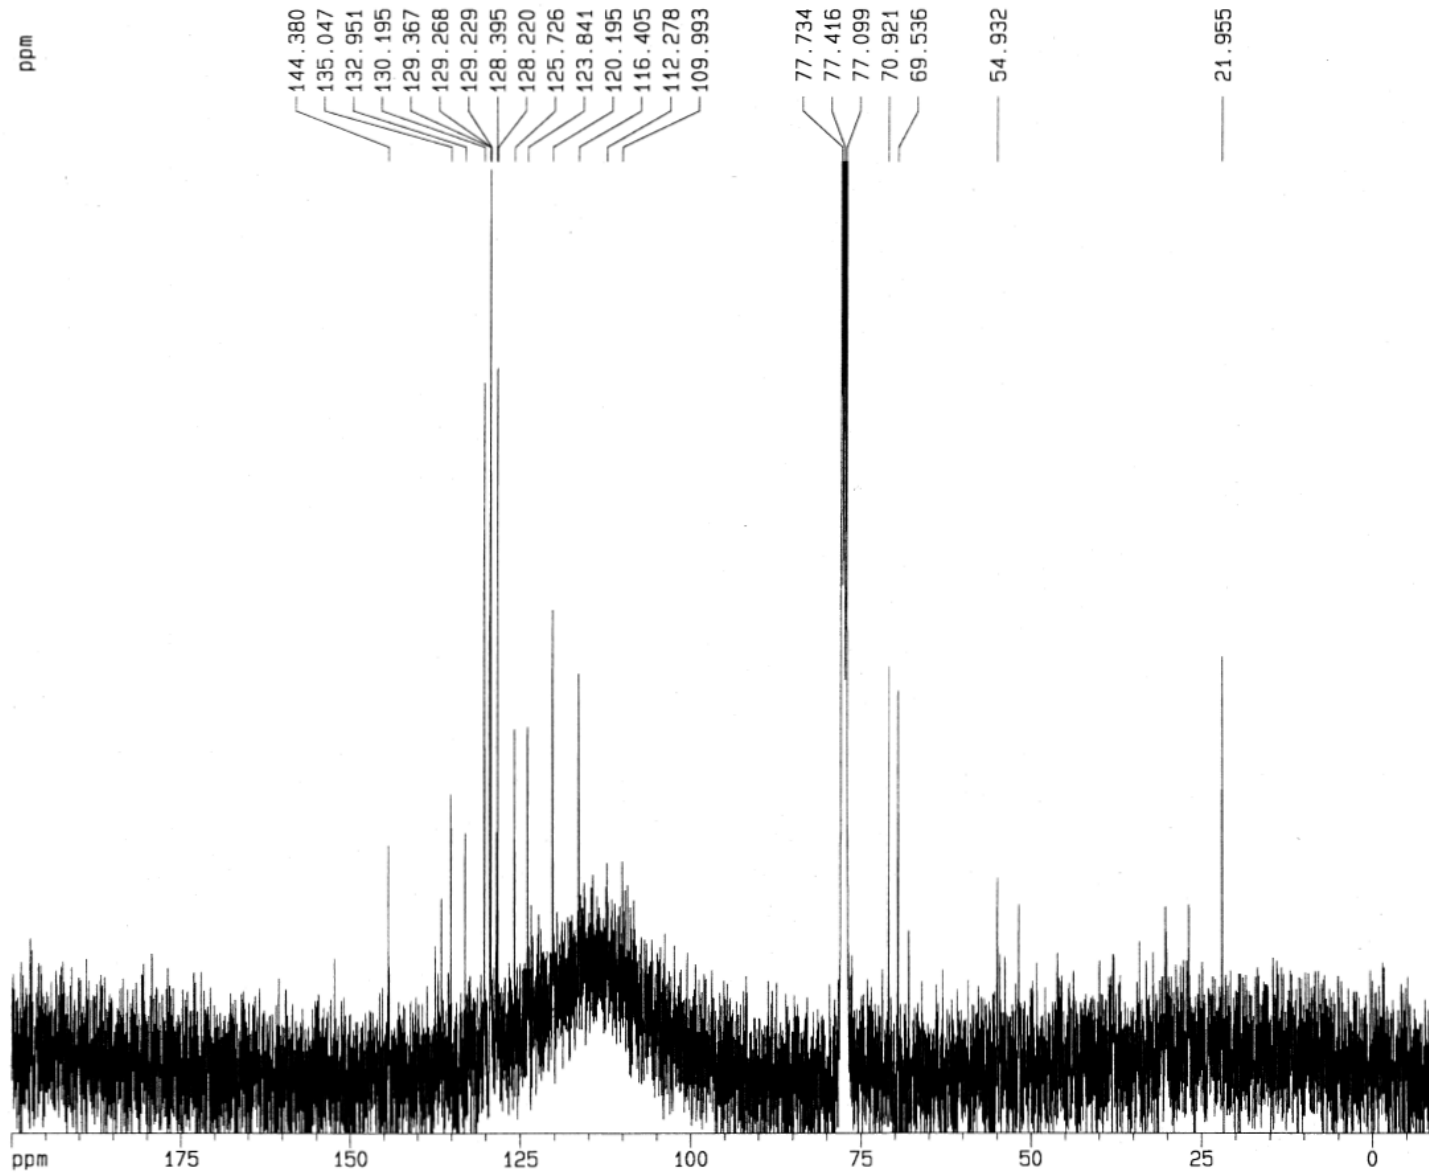

Current Data Parameters  
NAME 120812FJV-059B  
EXPNO 7  
PROCNO 1

F2 - Acquisition Parameters  
Date\_ 20121209  
Time 8.59  
INSTRUM spect  
PROBHD 5 mm BBI 1H-  
PULPROG zgpg30  
TD 65536  
SOLVENT CDC13  
NS 10240  
DS 4  
SWH 25125.629 Hz  
FIDRES 0.383387 Hz  
AQ 1.3042164 sec  
RG 16384  
DW 19.900 usec  
DE 6.00 usec  
TE 300.0 K  
D1 2.0000000 sec  
d11 0.0300000 sec  
d12 0.00002000 sec

----- CHANNEL f1 -----  
NUC1 13C  
P1 16.35 usec  
PL1 -6.00 dB  
SF01 100.6237959 MHz

----- CHANNEL f2 -----  
CPDPRG2 waltz16  
NUC2 1H  
PCPD2 114.00 usec  
PL2 0.00 dB  
PL12 24.00 dB  
PL13 24.00 dB  
SF02 400.1316005 MHz

F2 - Processing parameters  
SI 32768  
SF 100.6127290 MHz  
WDW EM  
SSB 0  
LB 1.00 Hz  
GB 0  
PC 1.40

1D NMR plot parameters  
CX 20.00 cm  
F1P 200.000 ppm  
F1 20122.55 Hz  
F2P -10.000 ppm  
F2 -1006.13 Hz  
PPMCM 10.50000 ppm/cm  
HZCM 1056.43372 Hz/cm

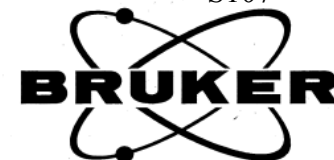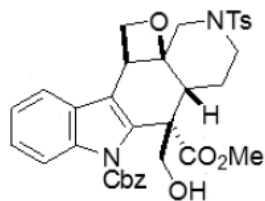

74

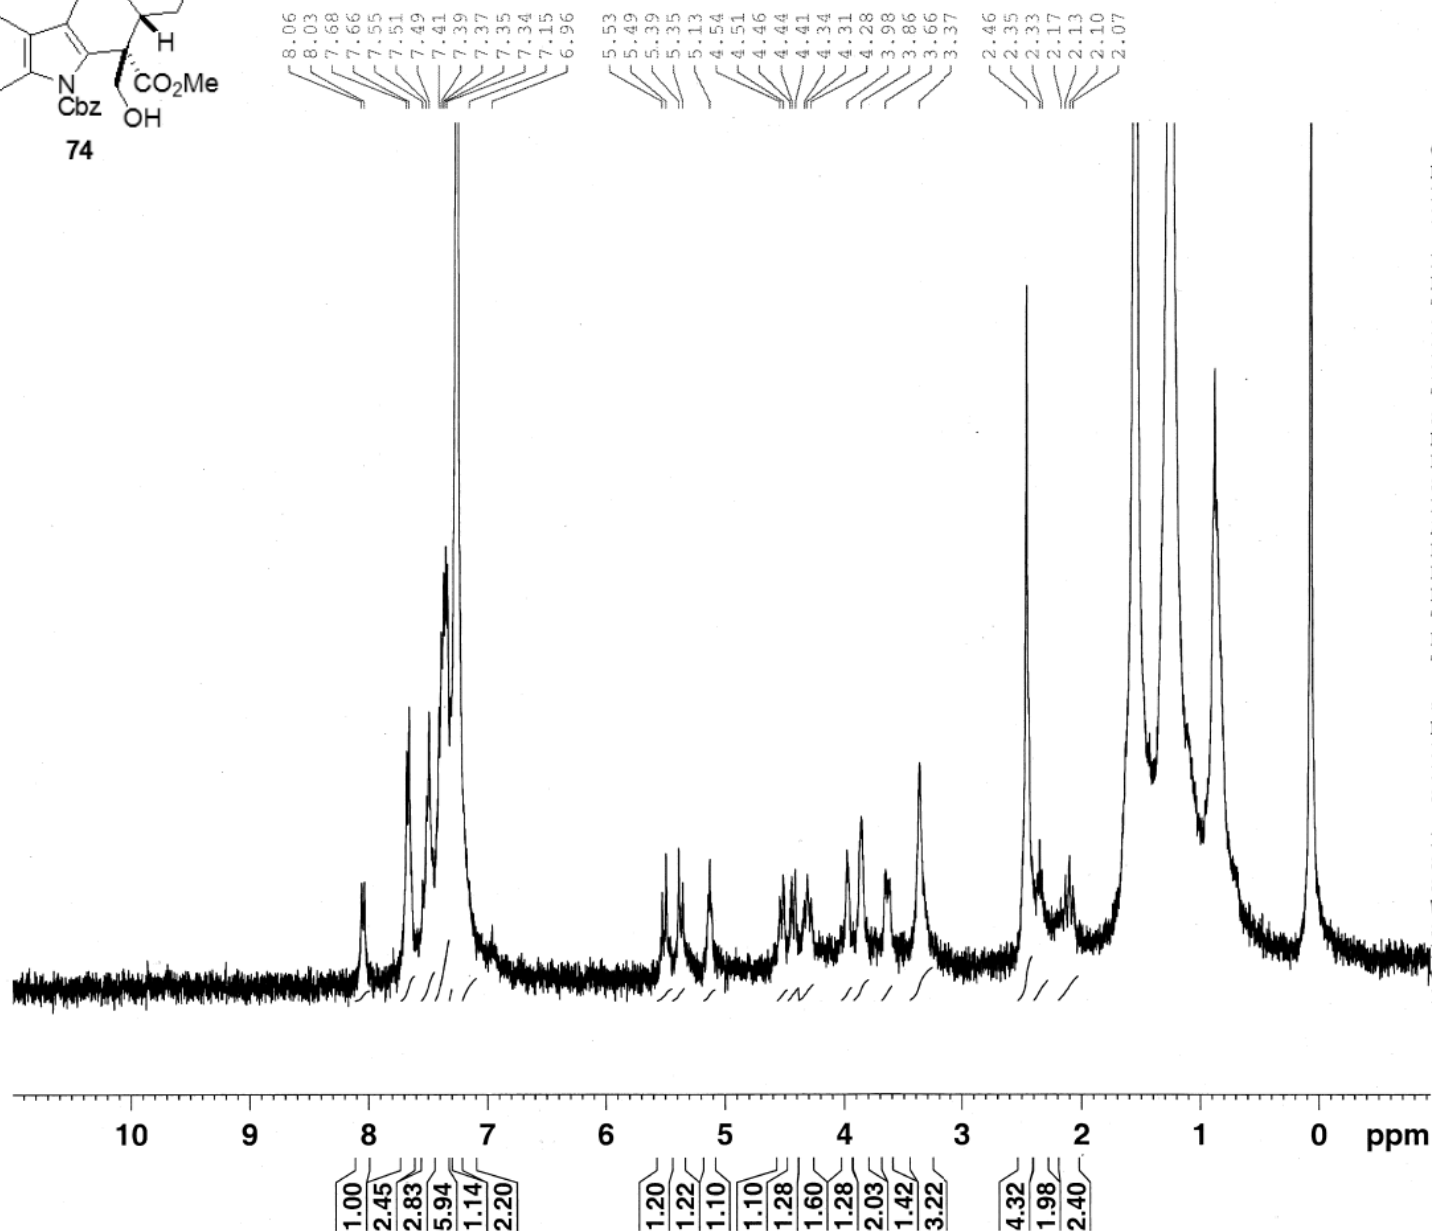

Current Data Parameters  
 NAME 121812FJV-085 Crude  
 EXPNO 2  
 PROCNO 1

F2 - Acquisition Parameters  
 Date\_ 20121218  
 Time 16.46  
 INSTRUM spect  
 PROBHD 5 mm QNP 1H/15  
 PULPROG zg30  
 TD 65536  
 SOLVENT CDCl3  
 NS 96  
 DS 2  
 SWH 7440.476 Hz  
 FIDRES 0.113533 Hz  
 AQ 4.4040694 sec  
 RG 2048  
 DW 67.200 usec  
 DE 6.00 usec  
 TE 295.5 K  
 D1 1.00000000 sec  
 TDO 1

==== CHANNEL f1 =====  
 NUC1 1H  
 P1 14.93 usec  
 PL1 -3.00 dB  
 SFO1 360.1322240 MHz

F2 - Processing parameters  
 SI 32768  
 SF 360.1300143 MHz  
 WDW EM  
 SSB 0  
 LB 0.30 Hz  
 GB 0  
 PC 1.00



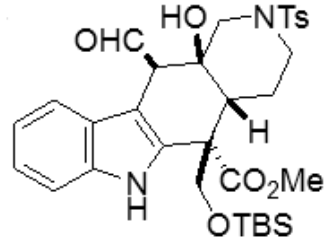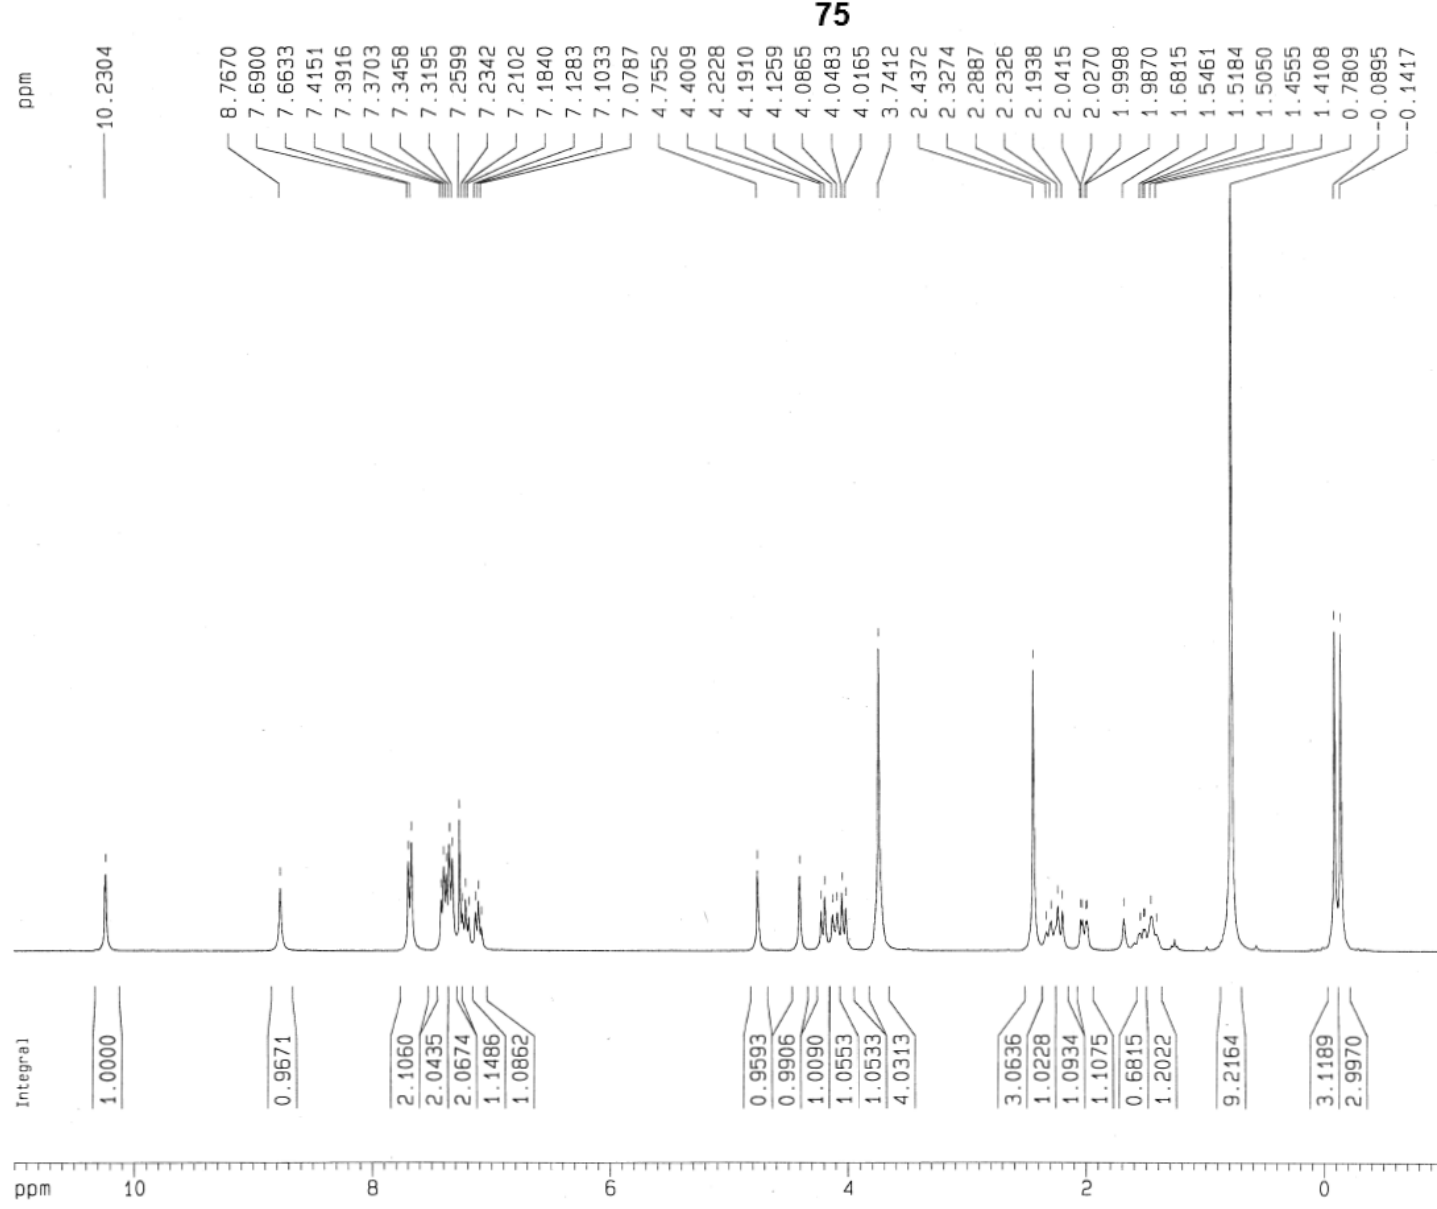

Current Data Parameters  
 NAME 082713FJV-284  
 EXPNO 1  
 PROCNO 1

F2 - Acquisition Parameters  
 Date\_ 20130827  
 Time 15.57  
 INSTRUM spect  
 PROBHD 5 mm GNP 1H/1  
 PULPROG zg30  
 TD 65536  
 SOLVENT CDCl3  
 NS 4  
 DS 2  
 SWH 6172.839 Hz  
 FIDRES 0.094190 Hz  
 AQ 5.3084660 sec  
 RG 143.7  
 DW 81.000 usec  
 DE 6.00 usec  
 TE 300.0 K  
 D1 1.0000000 sec

===== CHANNEL f1 =====  
 NUC1 1H  
 P1 12.10 usec  
 PL1 0.00 dB  
 SF01 299.8718518 MHz

F2 - Processing parameters  
 SI 32768  
 SF 299.8700103 MHz  
 WDW EM  
 SSB 0  
 LB 0.30 Hz  
 GB 0  
 PC 1.00

1D NMR plot parameters  
 CX 20.00 cm  
 F1P 11.000 ppm  
 F1 3298.57 Hz  
 F2P -1.000 ppm  
 F2 -299.87 Hz  
 PPMCM 0.60000 ppm/cm  
 HZCM 179.92200 Hz/cm

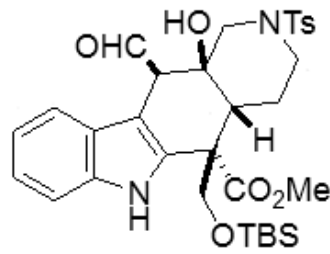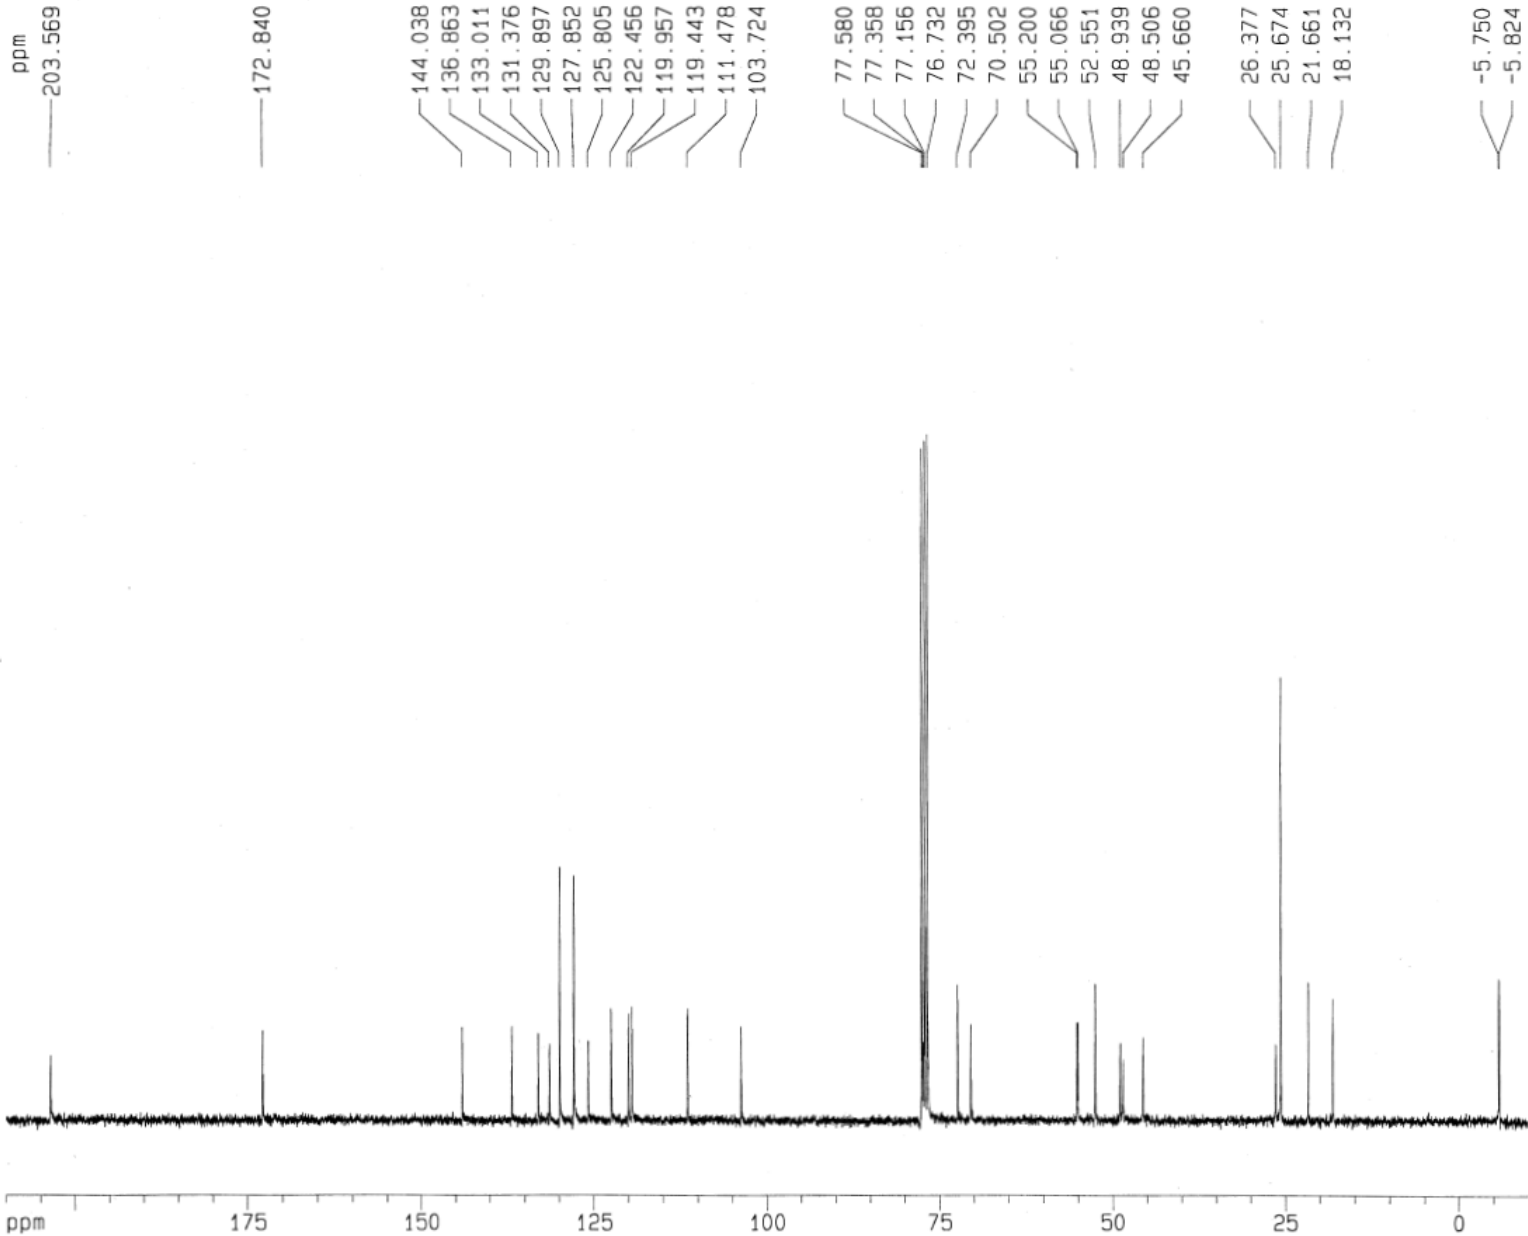

Current Data Parameters  
 NAME 082713FJV-284  
 EXPNO 2  
 PROCNO 1

F2 - Acquisition Parameters  
 Date\_ 20130827  
 Time 17.03  
 INSTRUM spect  
 PROBHD 5 mm GNP 1H/1  
 PULPROG zgpg30  
 TD 65536  
 SOLVENT CDC13  
 NS 1024  
 DS 4  
 SWH 18796.992 Hz  
 FIDRES 0.286819 Hz  
 AQ 1.7433076 sec  
 RG 1024  
 DW 26.600 usec  
 DE 6.00 usec  
 TE 300.0 K  
 D1 2.0000000 sec  
 D11 0.0300000 sec  
 D12 0.00002000 sec

===== CHANNEL f1 =====  
 NUC1 13C  
 P1 5.25 usec  
 PL1 -6.00 dB  
 SF01 75.4106357 MHz

===== CHANNEL f2 =====  
 CPDPRG2 waltz16  
 NUC2 1H  
 PCPD2 115.00 usec  
 PL2 0.00 dB  
 PL12 19.70 dB  
 PL13 19.70 dB  
 SF02 299.8711995 MHz

F2 - Processing parameters  
 SI 32768  
 SF 75.4023554 MHz  
 WDW EM  
 SSB 0  
 LB 1.00 Hz  
 GB 0  
 PC 1.40

1D NMR plot parameters  
 CX 20.00 cm  
 F1P 210.000 ppm  
 F1 15834.50 Hz  
 F2P -10.000 ppm  
 F2 -754.02 Hz  
 PPMCM 11.00000 ppm/cm  
 HZCM 829.42603 Hz/cm

FYQ-V-190 1H

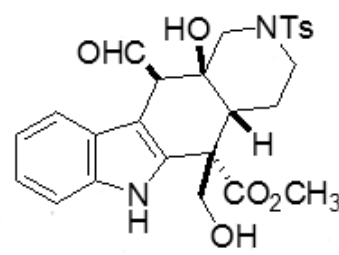

58

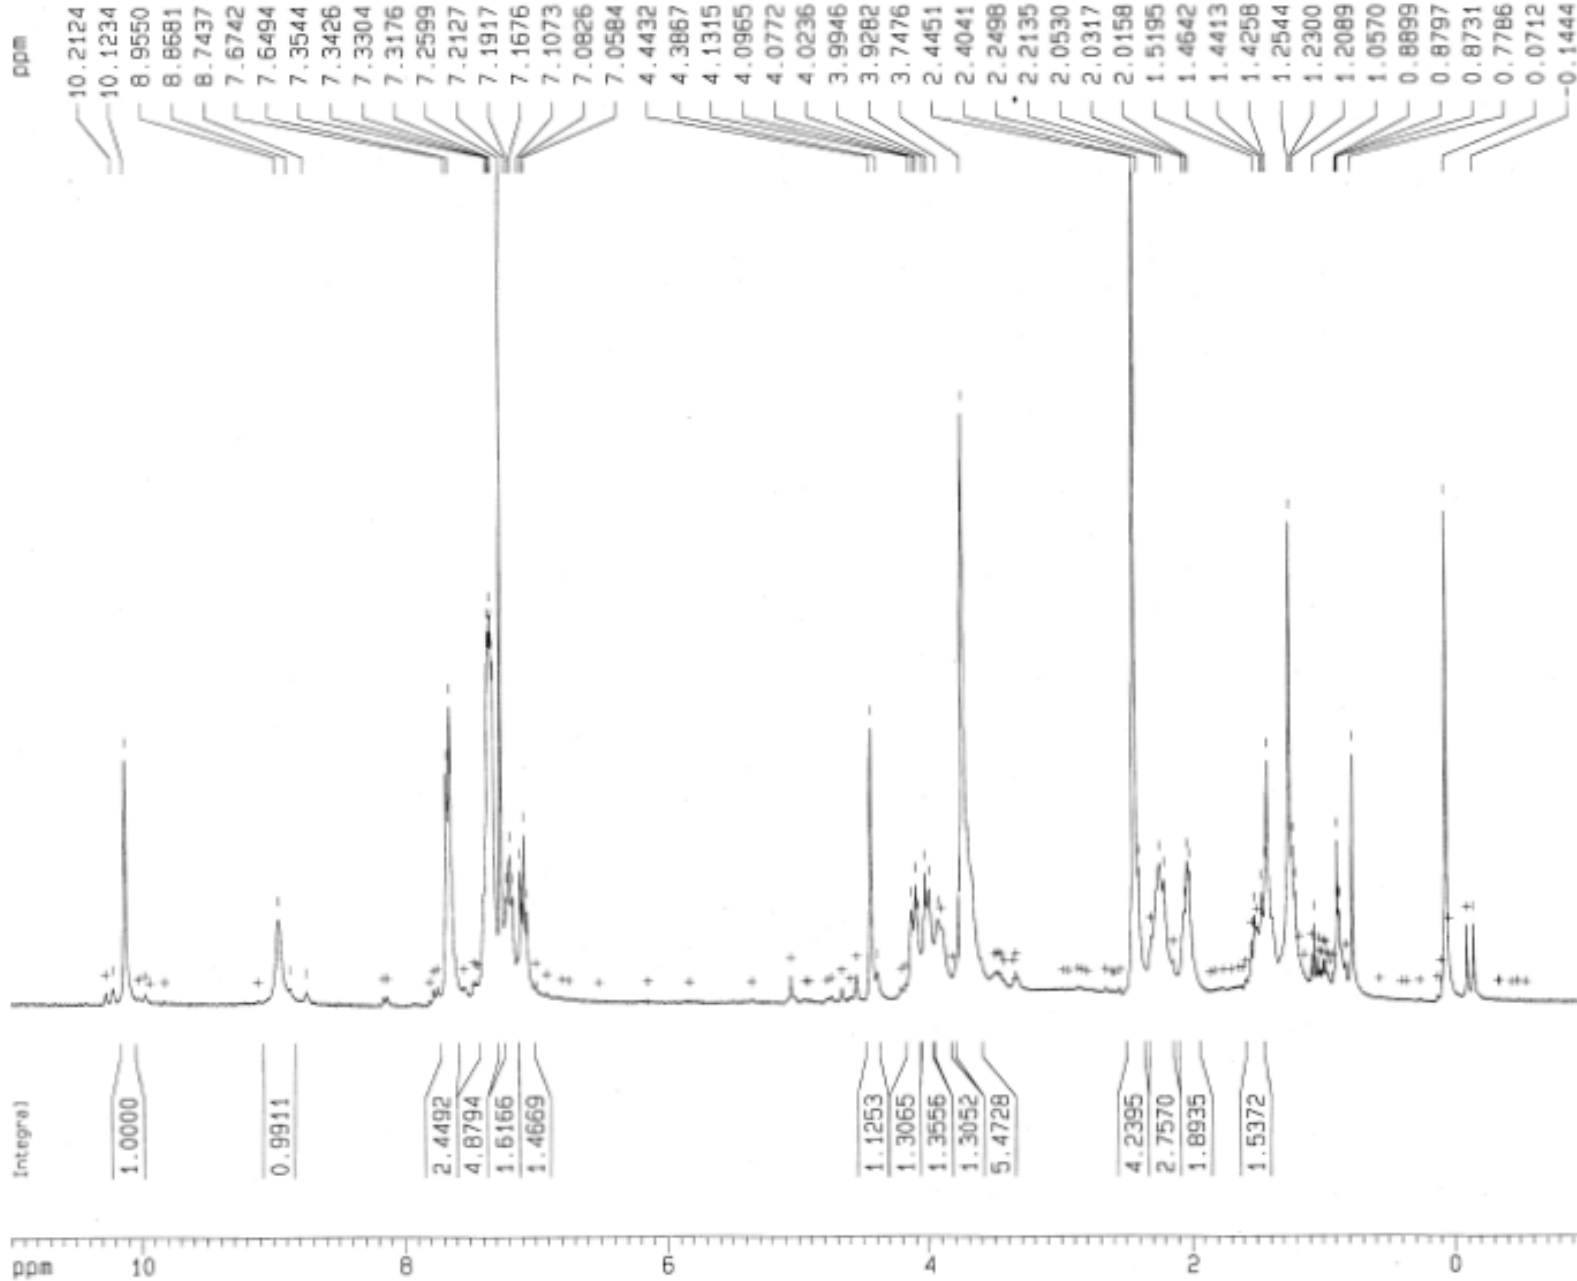

Current Data Parameters  
 NAME 062913FJV-190  
 EXPNO 1  
 PROCNO 1

F2 - Acquisition Parameters  
 Date\_ 20130629  
 Time 11.28  
 INSTRUM spect  
 PROBHD 5 mm QNP 1H/1  
 PULPROG zg30  
 TD 65536  
 SOLVENT CDCl3  
 NS 16  
 DS 2  
 SWH 6172.839 Hz  
 FIDRES 0.094190 Hz  
 AQ 5.3084660 sec  
 RG 512  
 DW 81.000 usec  
 DE 6.00 usec  
 TE 300.0 K  
 D1 1.00000000 sec

----- CHANNEL f1 -----  
 NUC1 1H  
 P1 12.10 usec  
 PL1 0.00 dB  
 SFO1 299.8718518 MHz

F2 - Processing parameters  
 SI 32768  
 SF 299.8700103 MHz  
 WDM EM  
 SSB 0  
 LB 0.30 Hz  
 GB 0  
 PC 1.00

1D NMR plot parameters  
 CX 20.00 cm  
 FtP 11.000 ppm  
 F1 3298.57 Hz  
 F2P -1.000 ppm  
 F2 -299.87 Hz  
 PPMCM 0.50000 ppm/cm  
 HZCM 179.92200 Hz/cm

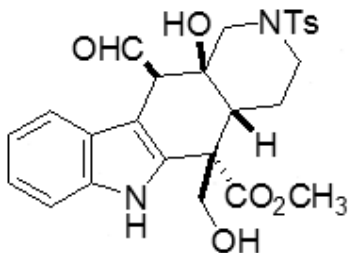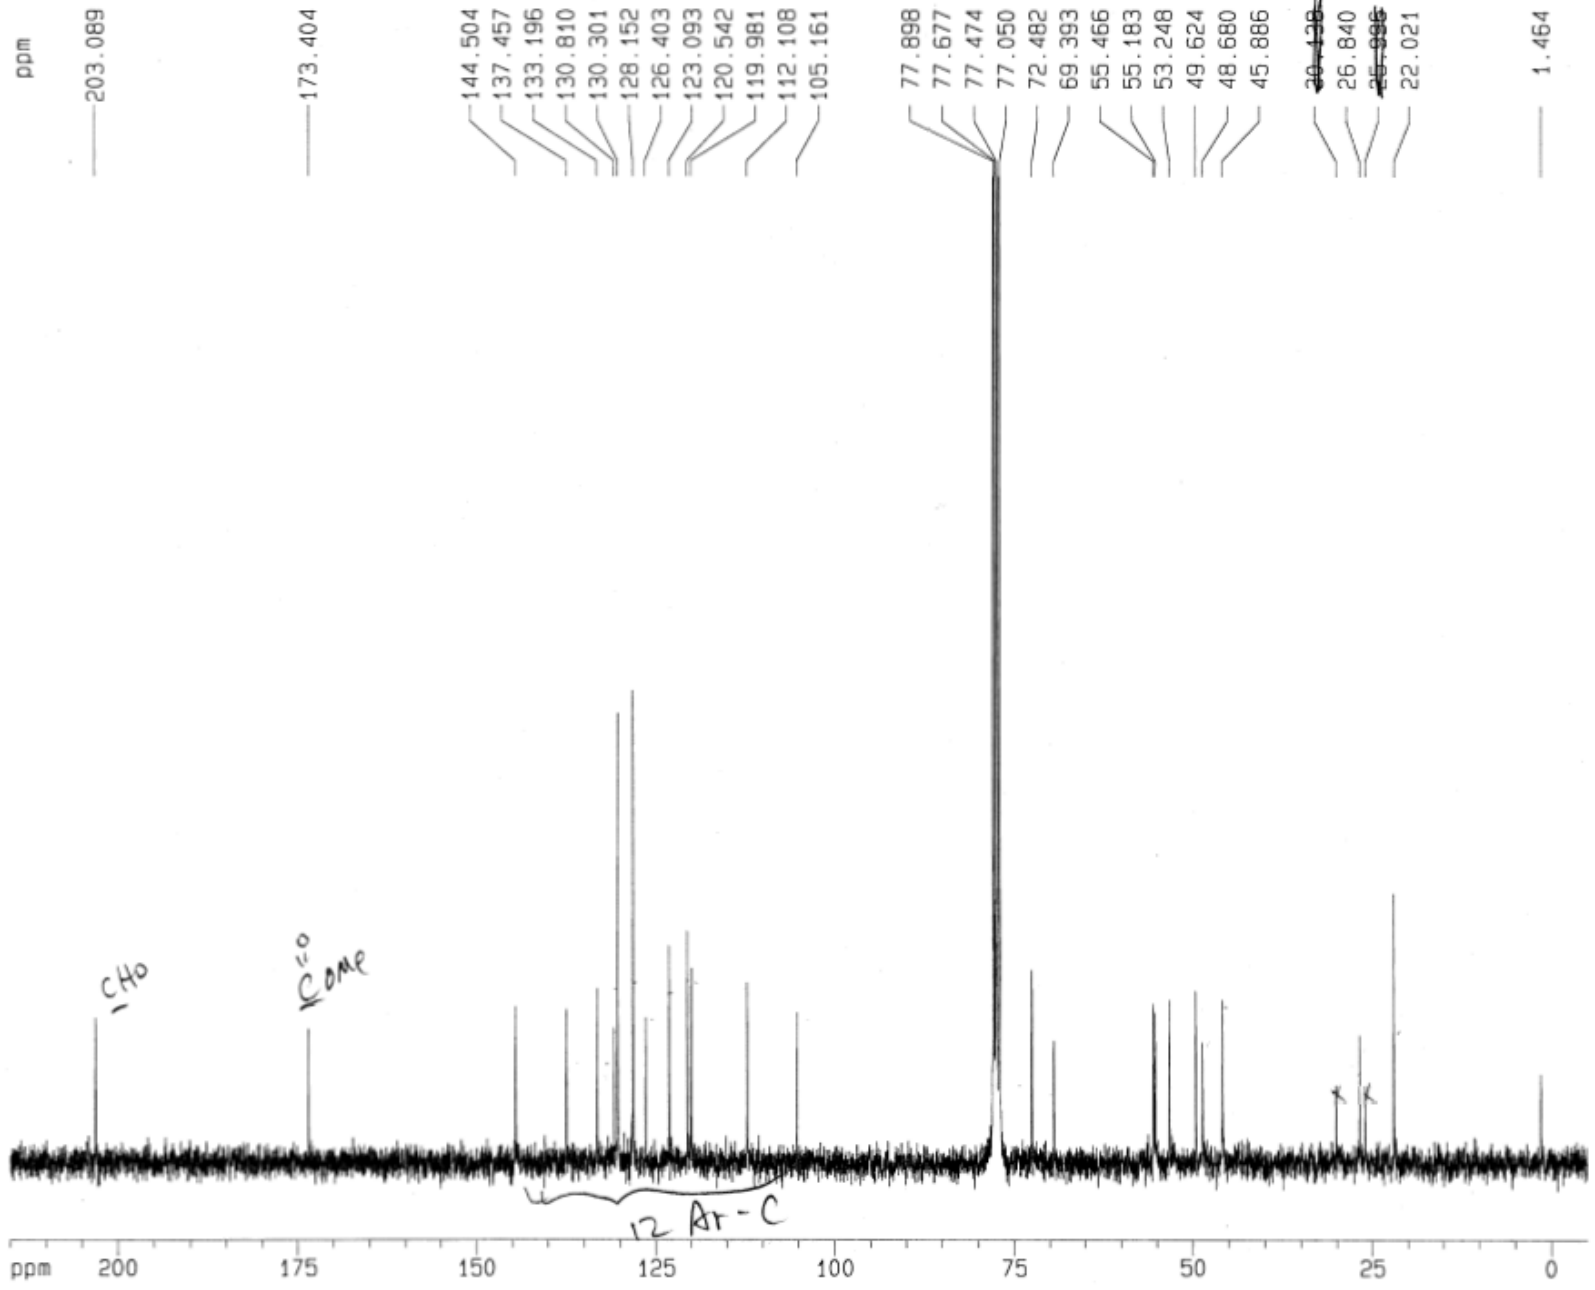

Current Data Parameters  
 NAME 062913FJV-190  
 EXPNO 2  
 PROCNO 1

F2 - Acquisition Parameters  
 Date\_ 20130629  
 Time 14.05  
 INSTRUM spect  
 PROBHD 5 mm QNP 1H/1  
 PULPROG zgpg30  
 TD 65536  
 SOLVENT CDC13  
 NS 2452  
 DS 4  
 SMH 18796.992 Hz  
 FIDRES 0.286819 Hz  
 AQ 1.7433076 sec  
 RG 1024  
 DM 26.600 usec  
 DE 6.00 usec  
 TE 300.0 K  
 D1 2.0000000 sec  
 D11 0.0300000 sec  
 D12 0.00002000 sec

===== CHANNEL f1 =====  
 NUC1 13C  
 P1 5.25 usec  
 PL1 -6.00 dB  
 SFO1 75.4106357 MHz

===== CHANNEL f2 =====  
 CPDPRG2 waltz16  
 NUC2 1H  
 PCPD2 115.00 usec  
 PL2 0.00 dB  
 PL12 19.70 dB  
 PL13 19.70 dB  
 SFO2 299.8711995 MHz

F2 - Processing parameters  
 SI 32768  
 SF 75.4023410 MHz  
 WDM EM  
 SSB 0  
 LB 1.00 Hz  
 GB 0  
 PC 1.40

1D NMR plot parameters  
 CX 20.00 cm  
 F1P 215.000 ppm  
 F1 16211.50 Hz  
 F2P -5.000 ppm  
 F2 -377.01 Hz  
 PPMCM 11.00000 ppm/cm  
 HZCM 829.42578 Hz/cm

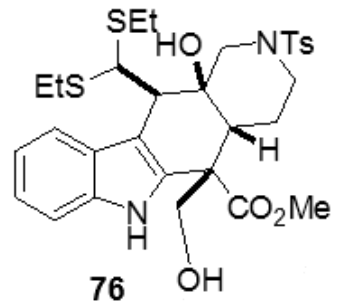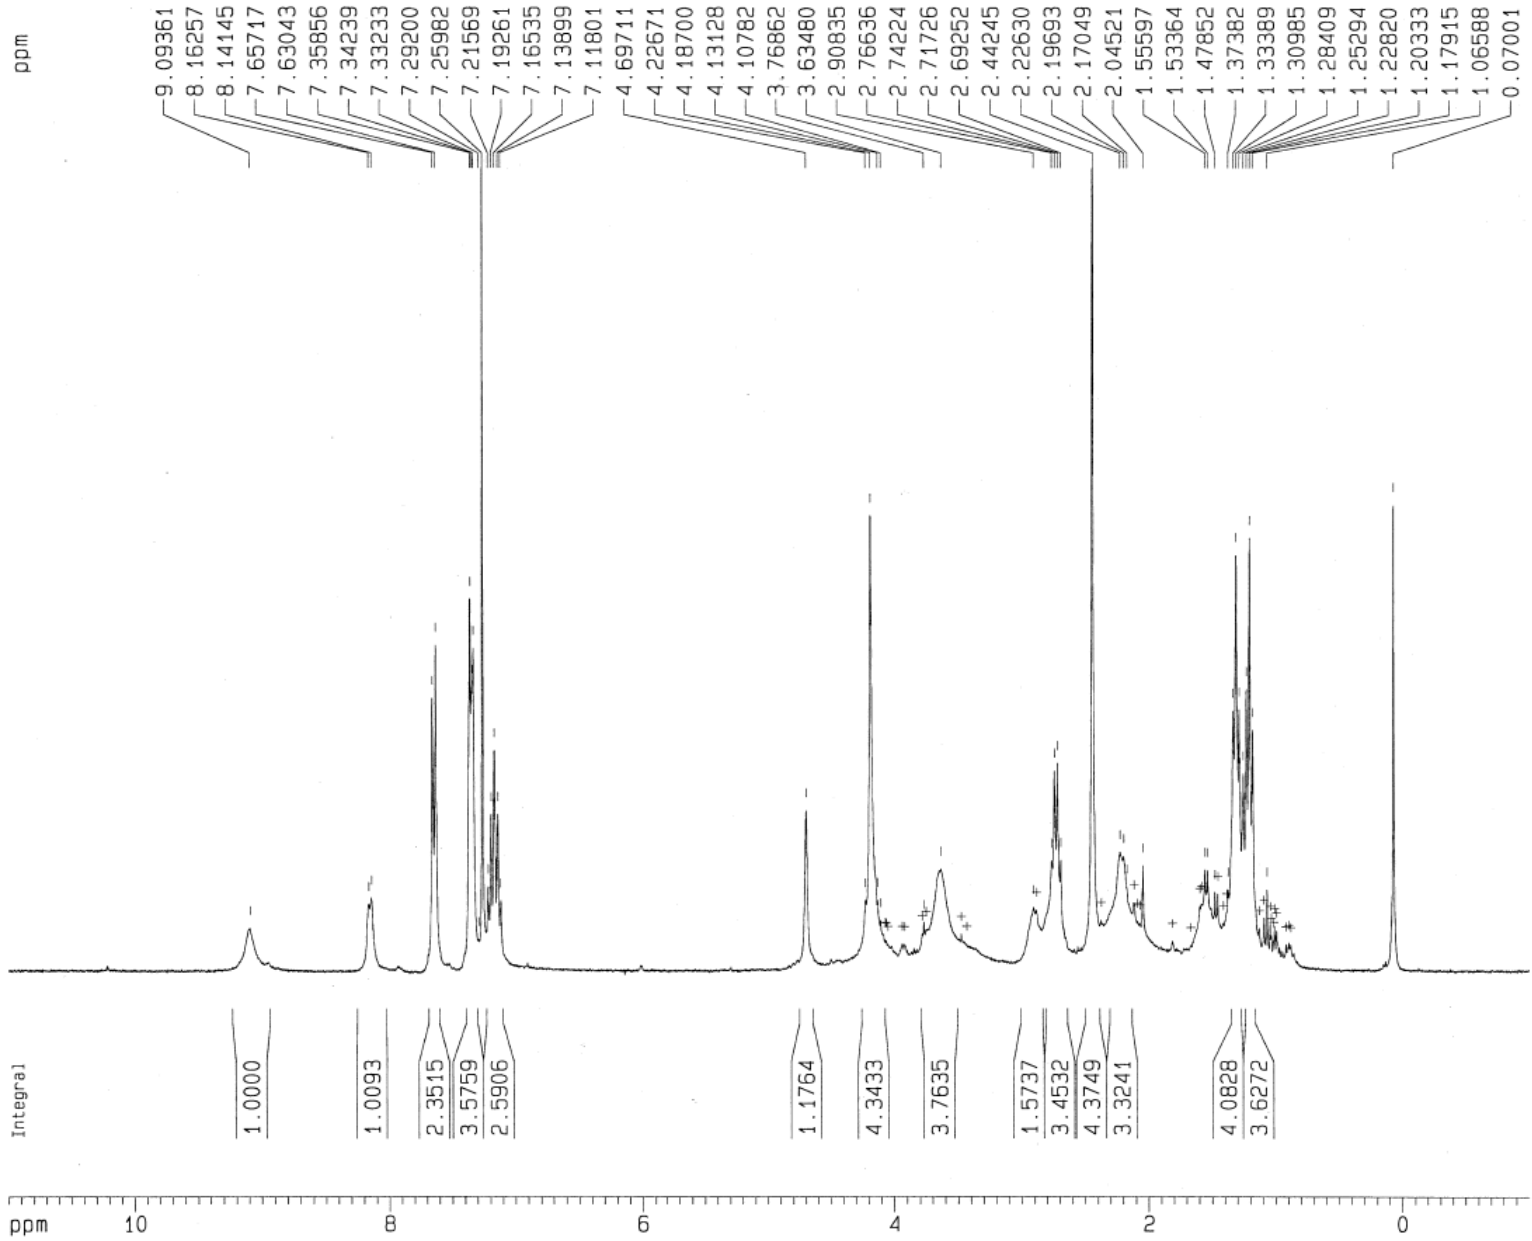

Current Data Parameters  
 NAME 070113FJV-193  
 EXPNO 1  
 PROCNO 1

F2 - Acquisition Parameters  
 Date\_ 20130701  
 Time 12.21  
 INSTRUM spect  
 PROBHD 5 mm GNP 1H/1  
 PULPROG zg30  
 TD 65536  
 SOLVENT CDC13  
 NS 16  
 DS 2  
 SWH 6172.839 Hz  
 FIDRES 0.094190 Hz  
 AQ 5.3084660 sec  
 RG 574.7  
 DW 81.000 usec  
 DE 6.00 usec  
 TE 300.0 K  
 D1 1.00000000 sec

----- CHANNEL f1 -----  
 NUC1 1H  
 P1 12.10 usec  
 PL1 0.00 dB  
 SFO1 299.8718518 MHz

F2 - Processing parameters  
 SI 32768  
 SF 299.8700101 MHz  
 WDW EM  
 SSB 0  
 LB 0.30 Hz  
 GB 0  
 PC 1.00

1D NMR plot parameters  
 CX 20.00 cm  
 F1P 11.000 ppm  
 F1 3298.57 Hz  
 F2P -1.000 ppm  
 F2 -299.87 Hz  
 PPMCM 0.50000 ppm/cm  
 HZCM 179.92200 Hz/cm

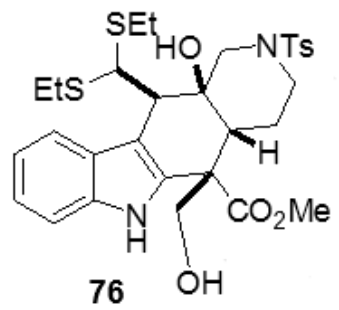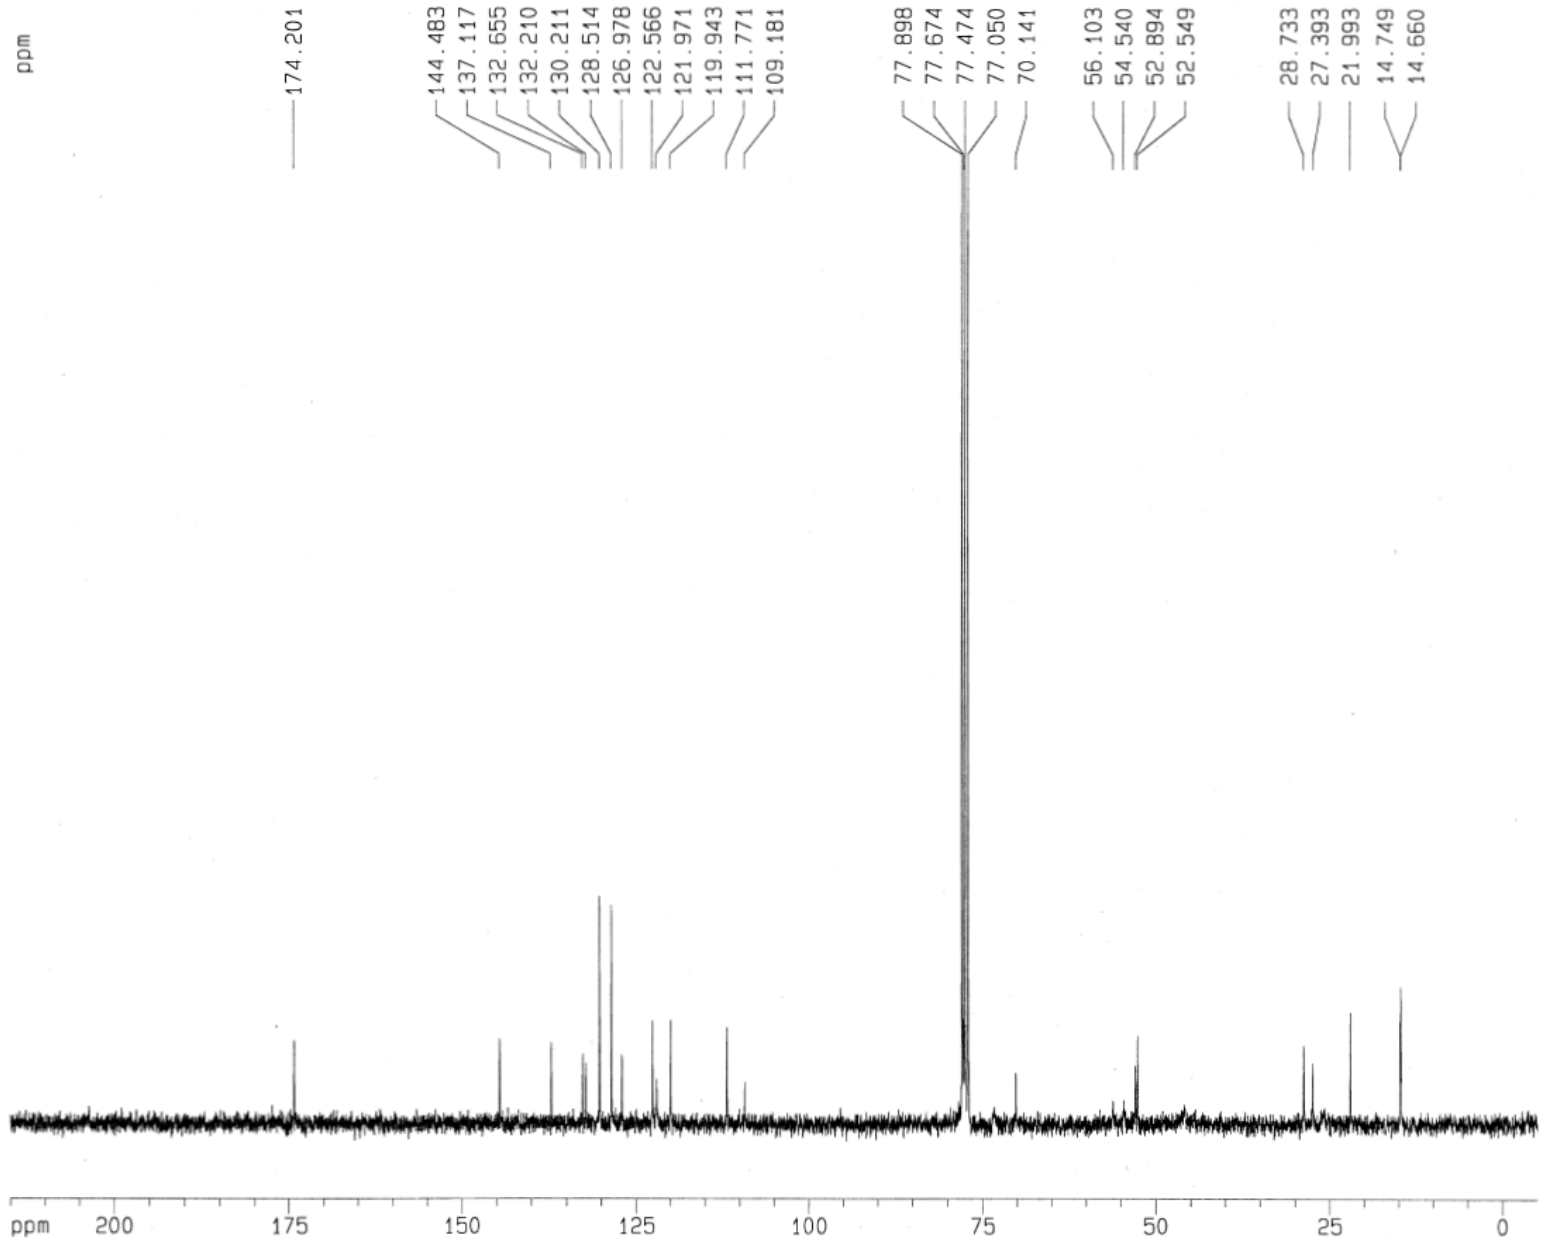

Current Data Parameters  
 NAME 082813FJV-286  
 EXPNO 2  
 PROCNO 1

F2 - Acquisition Parameters  
 Date\_ 20130828  
 Time 12.23  
 INSTRUM spect  
 PROBHD 5 mm QNP 1H/1  
 PULPROG zgpg30  
 TD 65536  
 SOLVENT CDCl3  
 NS 730  
 DS 4  
 SWH 18796.992 Hz  
 FIDRES 0.286819 Hz  
 AQ 1.7433076 sec  
 RG 1024  
 DW 26.600 usec  
 DE 6.00 usec  
 TE 300.0 K  
 D1 2.0000000 sec  
 D11 0.0300000 sec  
 D12 0.00002000 sec

===== CHANNEL f1 =====  
 NUC1 13C  
 P1 5.25 usec  
 PL1 -6.00 dB  
 SFO1 75.4106357 MHz

===== CHANNEL f2 =====  
 CPDPRG2 waltz16  
 NUC2 1H  
 PCPD2 115.00 usec  
 PL2 0.00 dB  
 PL12 19.70 dB  
 PL13 19.70 dB  
 SFO2 299.8711995 MHz

F2 - Processing parameters  
 SI 32768  
 SF 75.4023410 MHz  
 WDW EM  
 SSB 0  
 LB 1.00 Hz  
 GB 0  
 PC 1.40

1D NMR plot parameters  
 CX 20.00 cm  
 F1P 215.000 ppm  
 F1 16211.50 Hz  
 F2P -5.000 ppm  
 F2 -377.01 Hz  
 PPMCM 11.00000 ppm/cm  
 HZCM 829.42578 Hz/cm

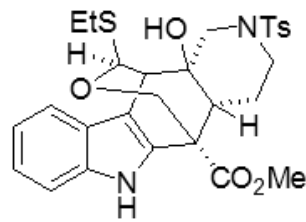

77

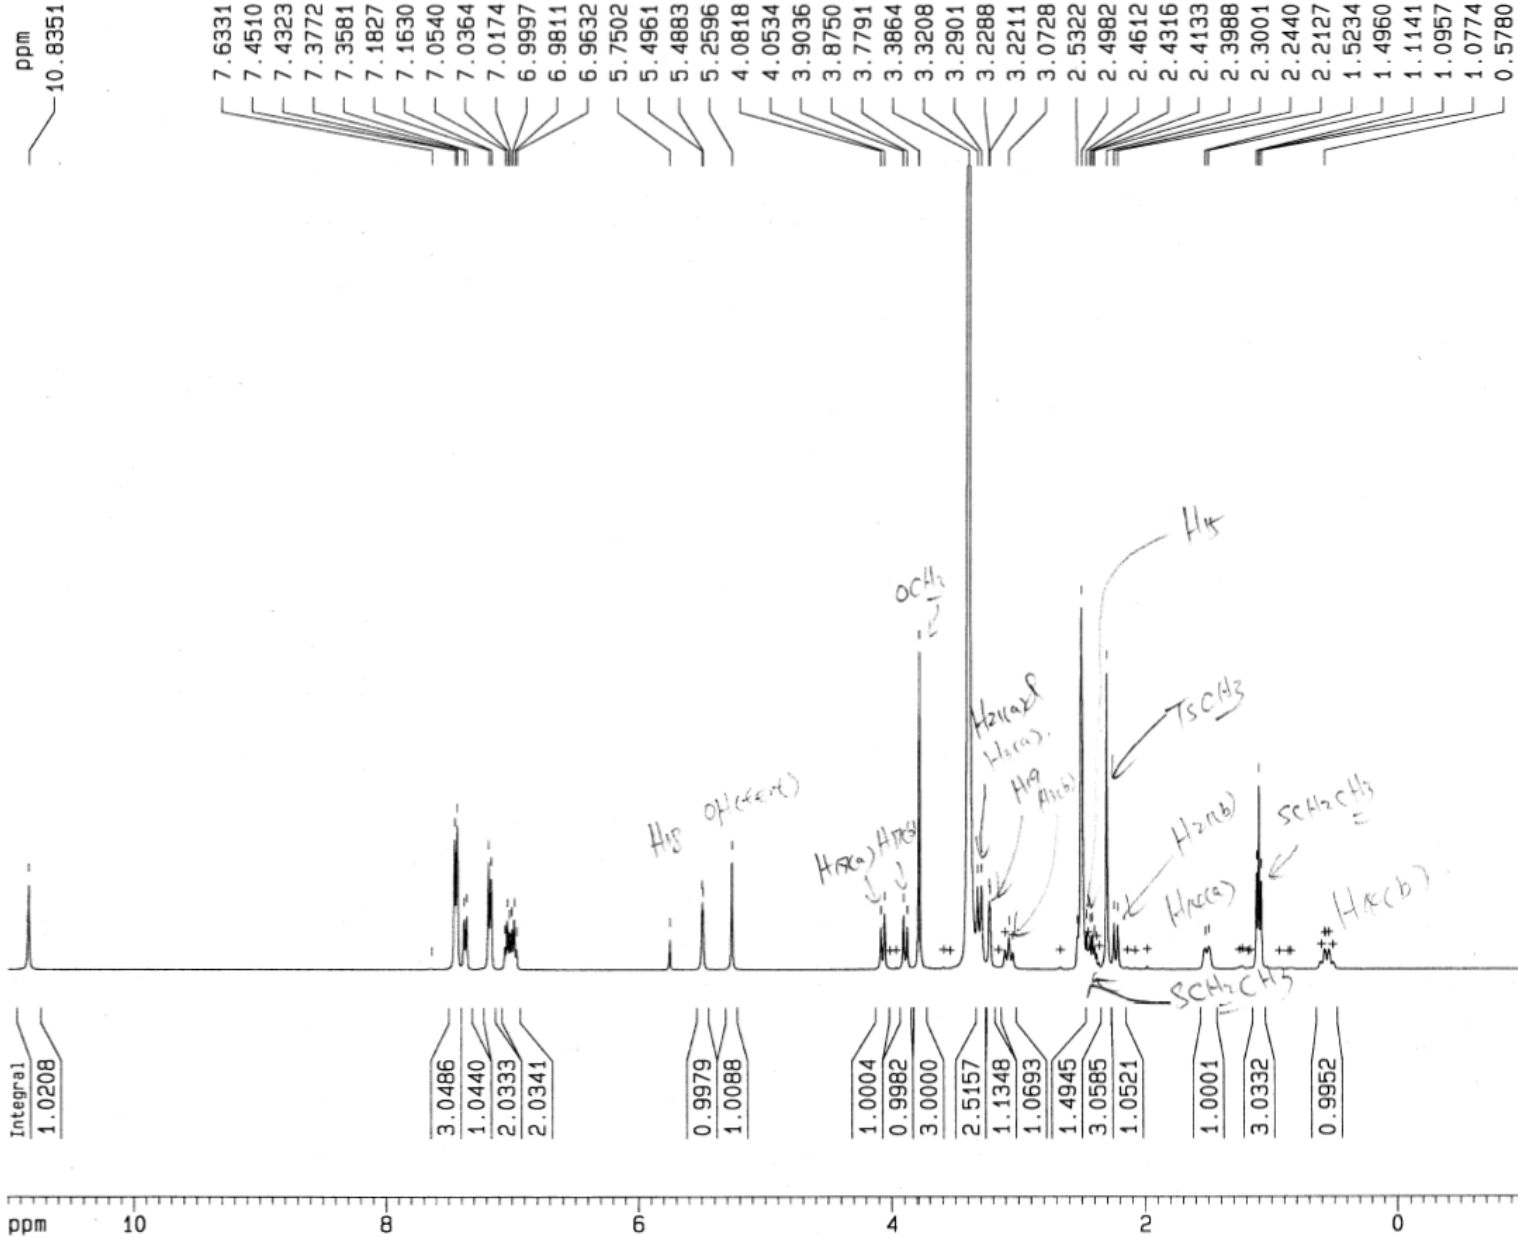

Current Data Parameters  
 NAME 071213FJV-218L  
 EXPNO 2  
 PROCNO 1

F2 - Acquisition Parameters  
 Date\_ 20130712  
 Time 19.23  
 INSTRUM spect  
 PROBHD 5 mm BBI 1H-  
 PULPROG zg30  
 TD 65536  
 SOLVENT DMSO  
 NS 16  
 DS 2  
 SWH 8278.146 Hz  
 FIDRES 0.126314 Hz  
 AQ 3.9584243 sec  
 RG 128  
 DW 60.400 usec  
 DE 6.00 usec  
 TE 300.0 K  
 D1 1.00000000 sec

===== CHANNEL f1 =====  
 NUC1 1H  
 P1 6.45 usec  
 PL1 0.00 dB  
 SF01 400.1324710 MHz

F2 - Processing parameters  
 SI 32768  
 SF 400.1300041 MHz  
 WDW EM  
 SSB 0  
 LB 0.30 Hz  
 GB 0  
 PC 1.00

1D NMR plot parameters  
 CX 20.00 cm  
 F1P 11.000 ppm  
 F1 4401.43 Hz  
 F2P -1.000 ppm  
 F2 -400.13 Hz  
 PPMCM 0.60000 ppm/cm  
 HZCM 240.07800 Hz/cm

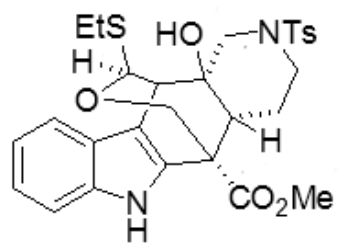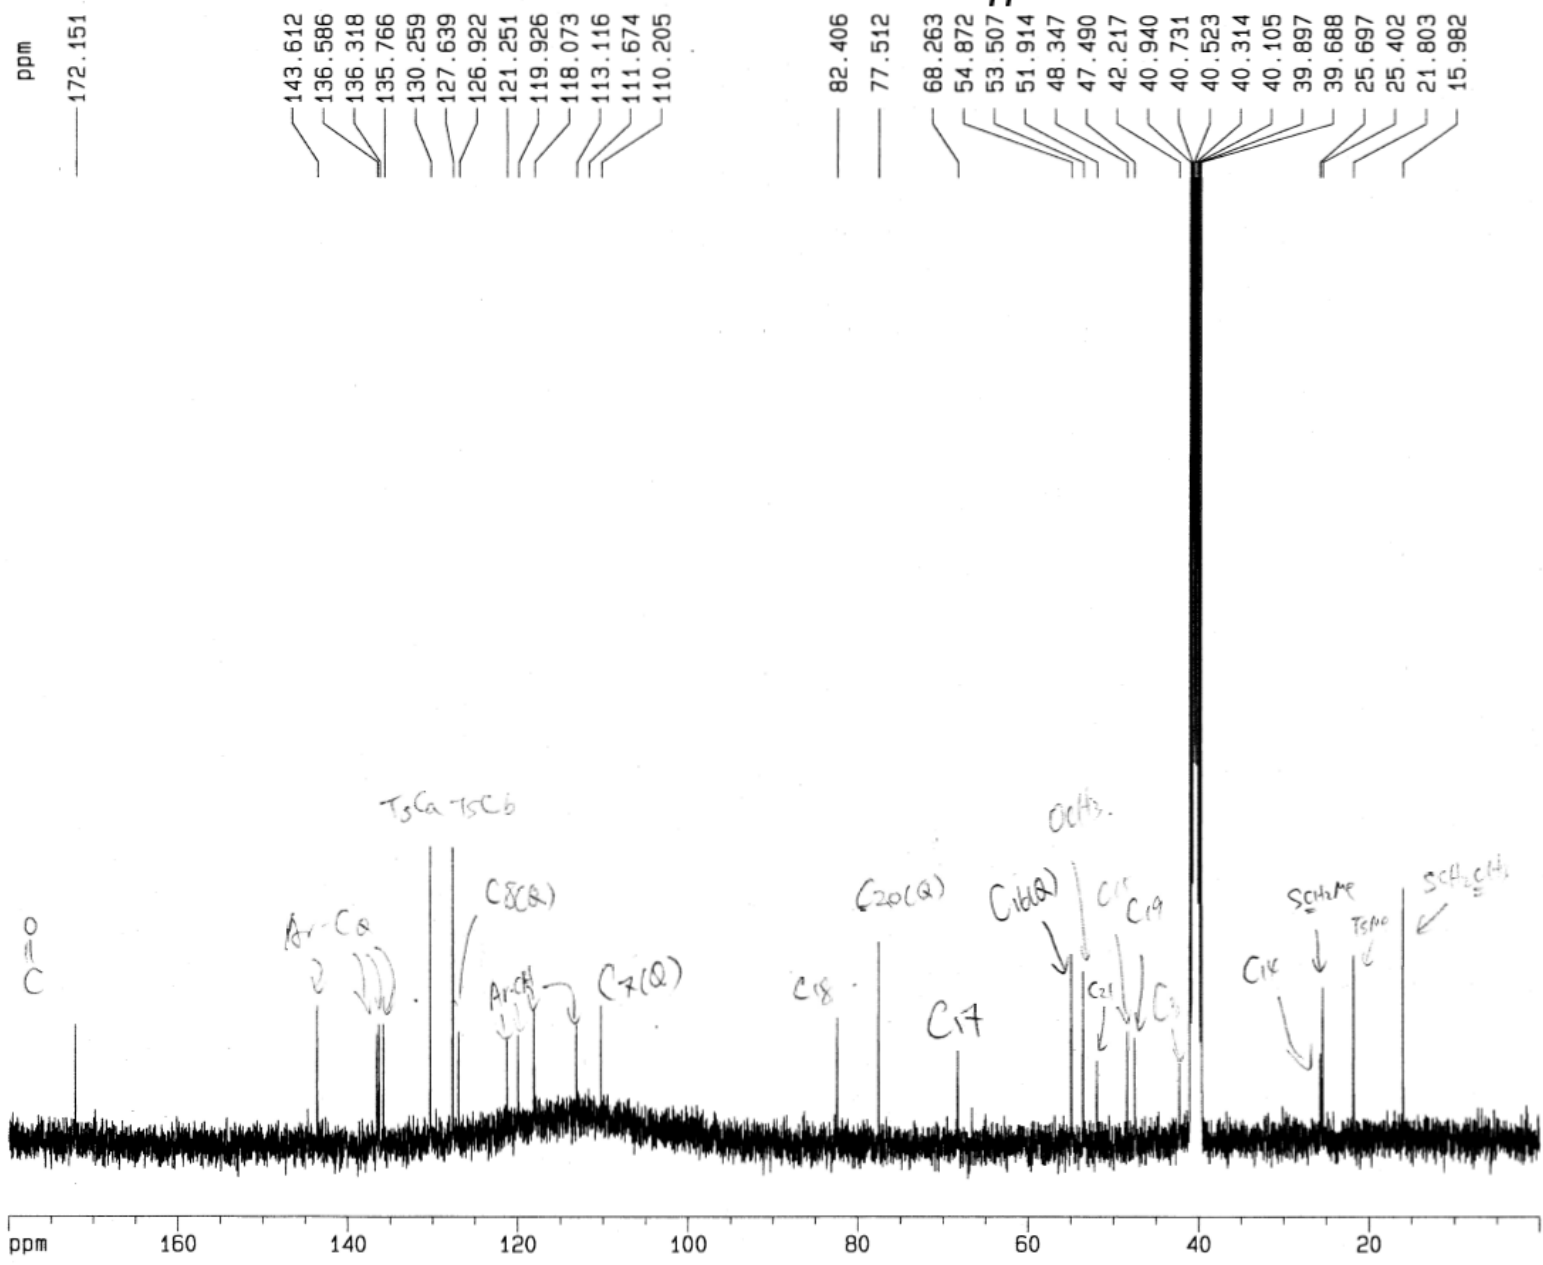

Current Data Parameters  
 NAME 071213FJV-218L  
 EXPNO 7  
 PROCNO 1

F2 - Acquisition Parameters  
 Date\_ 20130713  
 Time 8.26  
 INSTRUM spect  
 PROBHD 5 mm BBI 1H-  
 PULPROG zgpg30  
 TD 65536  
 SOLVENT DMSO  
 NS 10240  
 DS 4  
 SWH 25125.629 Hz  
 FIDRES 0.383387 Hz  
 AQ 1.3042164 sec  
 RG 16384  
 DW 19.900 usec  
 DE 6.00 usec  
 TE 300.0 K  
 D1 2.00000000 sec  
 D11 0.03000000 sec  
 D12 0.00002000 sec

----- CHANNEL f1 -----  
 NUC1 13C  
 P1 16.35 usec  
 PL1 -6.00 dB  
 SFO1 100.6237959 MHz

----- CHANNEL f2 -----  
 CPDPRG2 waltz16  
 NUC2 1H  
 PCPD2 114.00 usec  
 PL2 0.00 dB  
 PL12 24.00 dB  
 PL13 24.00 dB  
 SFO2 400.1316005 MHz

F2 - Processing parameters  
 SI 32768  
 SF 100.6127290 MHz  
 NDM EM  
 SSB 0  
 LB 1.00 Hz  
 GB 0  
 PC 1.40

1D NMR plot parameters  
 CX 20.00 cm  
 F1P 180.000 ppm  
 F1 18110.29 Hz  
 F2P 0.000 ppm  
 F2 0.00 Hz  
 PPMCM 9.00000 ppm/cm  
 HZCM 905.51459 Hz/cm



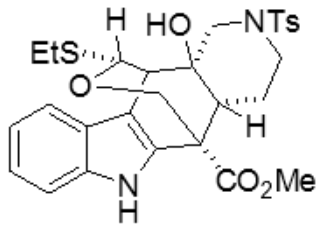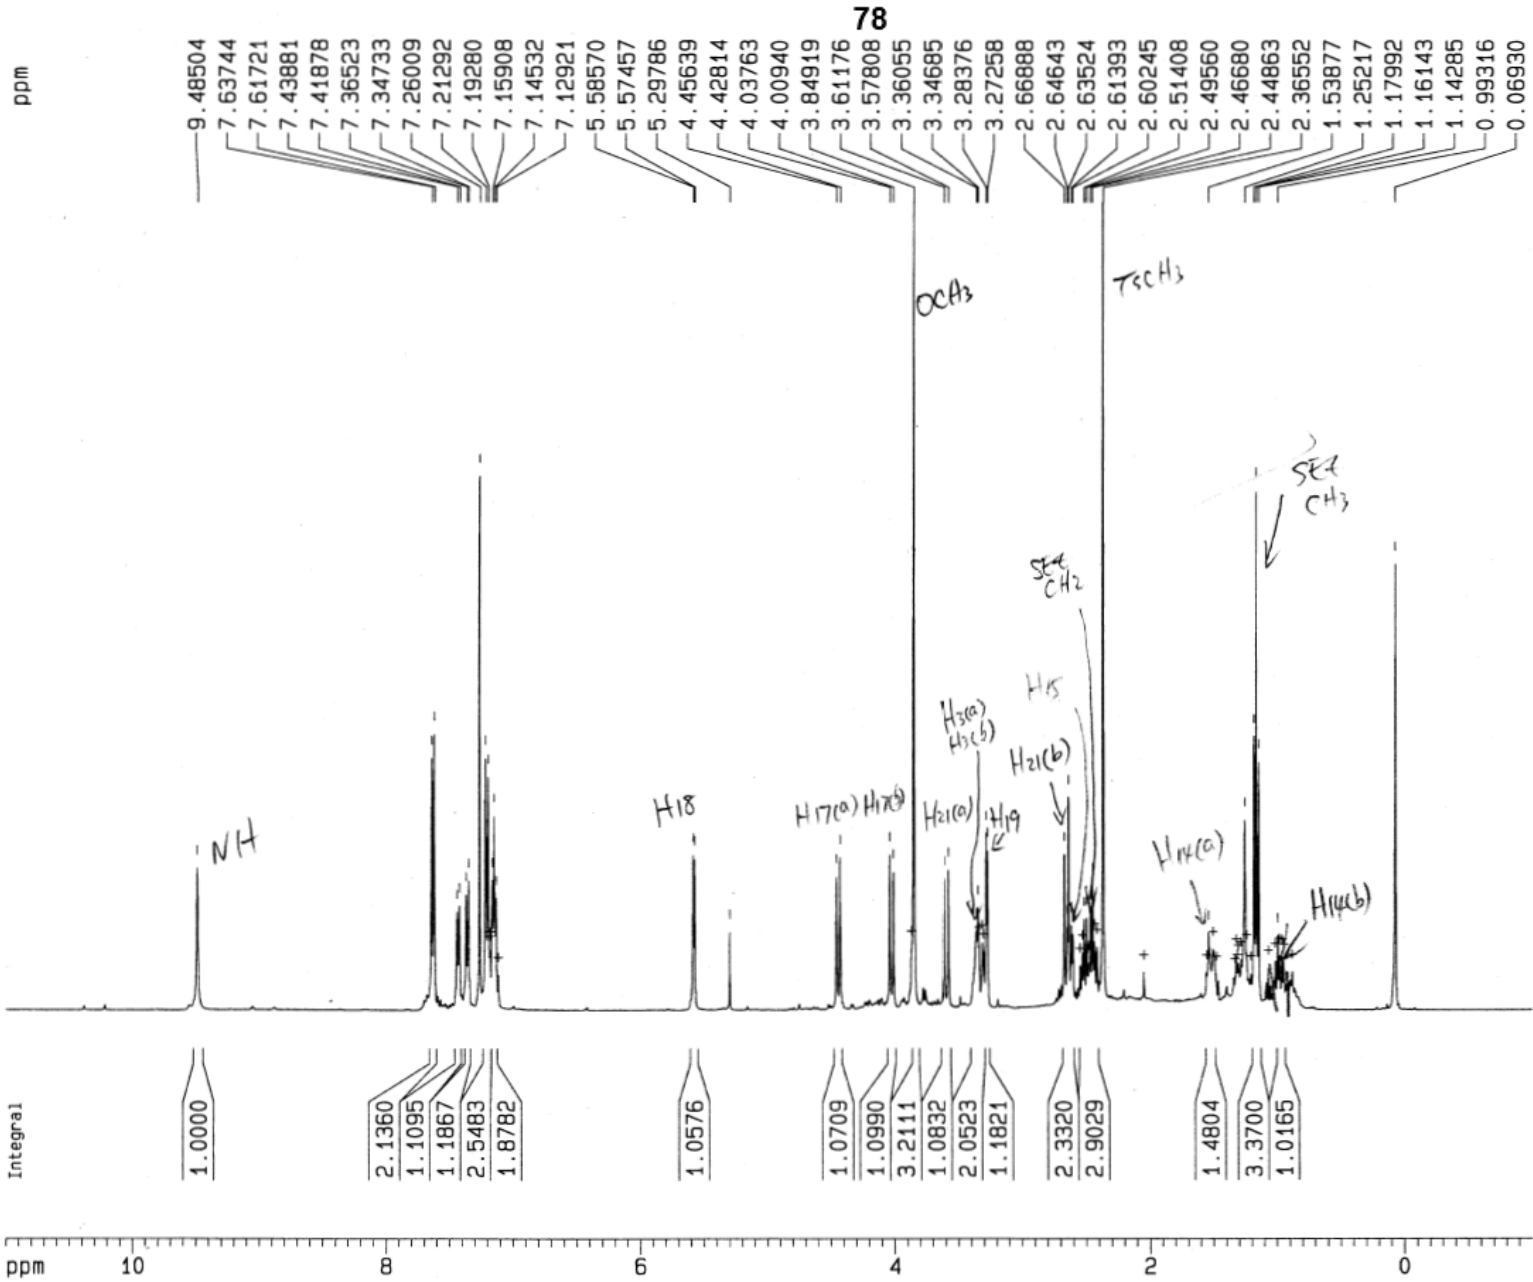

Current Data Parameters  
 NAME 070313FJV-200P  
 EXPNO 2  
 PROCNO 1

F2 - Acquisition Parameters  
 Date\_ 20130703  
 Time 17.22  
 INSTRUM spect  
 PROBHD 5 mm BBI 1H-  
 PULPROG zg30  
 TD 65536  
 SOLVENT CDCl3  
 NS 16  
 DS 2  
 SNH 8278.146 Hz  
 FIDRES 0.126314 Hz  
 AQ 3.9584243 sec  
 RG 181  
 DW 60.400 usec  
 DE 5.00 usec  
 TE 300.0 K  
 D1 1.00000000 sec

----- CHANNEL f1 -----  
 NUC1 1H  
 P1 6.45 usec  
 PL1 0.00 dB  
 SF01 400.1324710 MHz

F2 - Processing parameters  
 SI 32768  
 SF 400.1300099 MHz  
 WDW EM  
 SSB 0  
 LB 0.30 Hz  
 GB 0  
 PC 1.00

1D NMR plot parameters  
 CX 20.00 cm  
 F1P 11.000 ppm  
 F1 4401.43 Hz  
 F2P -1.000 ppm  
 F2 -400.13 Hz  
 PPMCM 0.60000 ppm/cm  
 HZCM 240.07800 Hz/cm

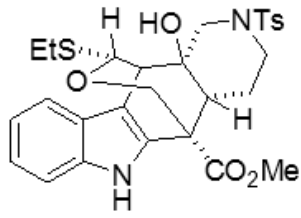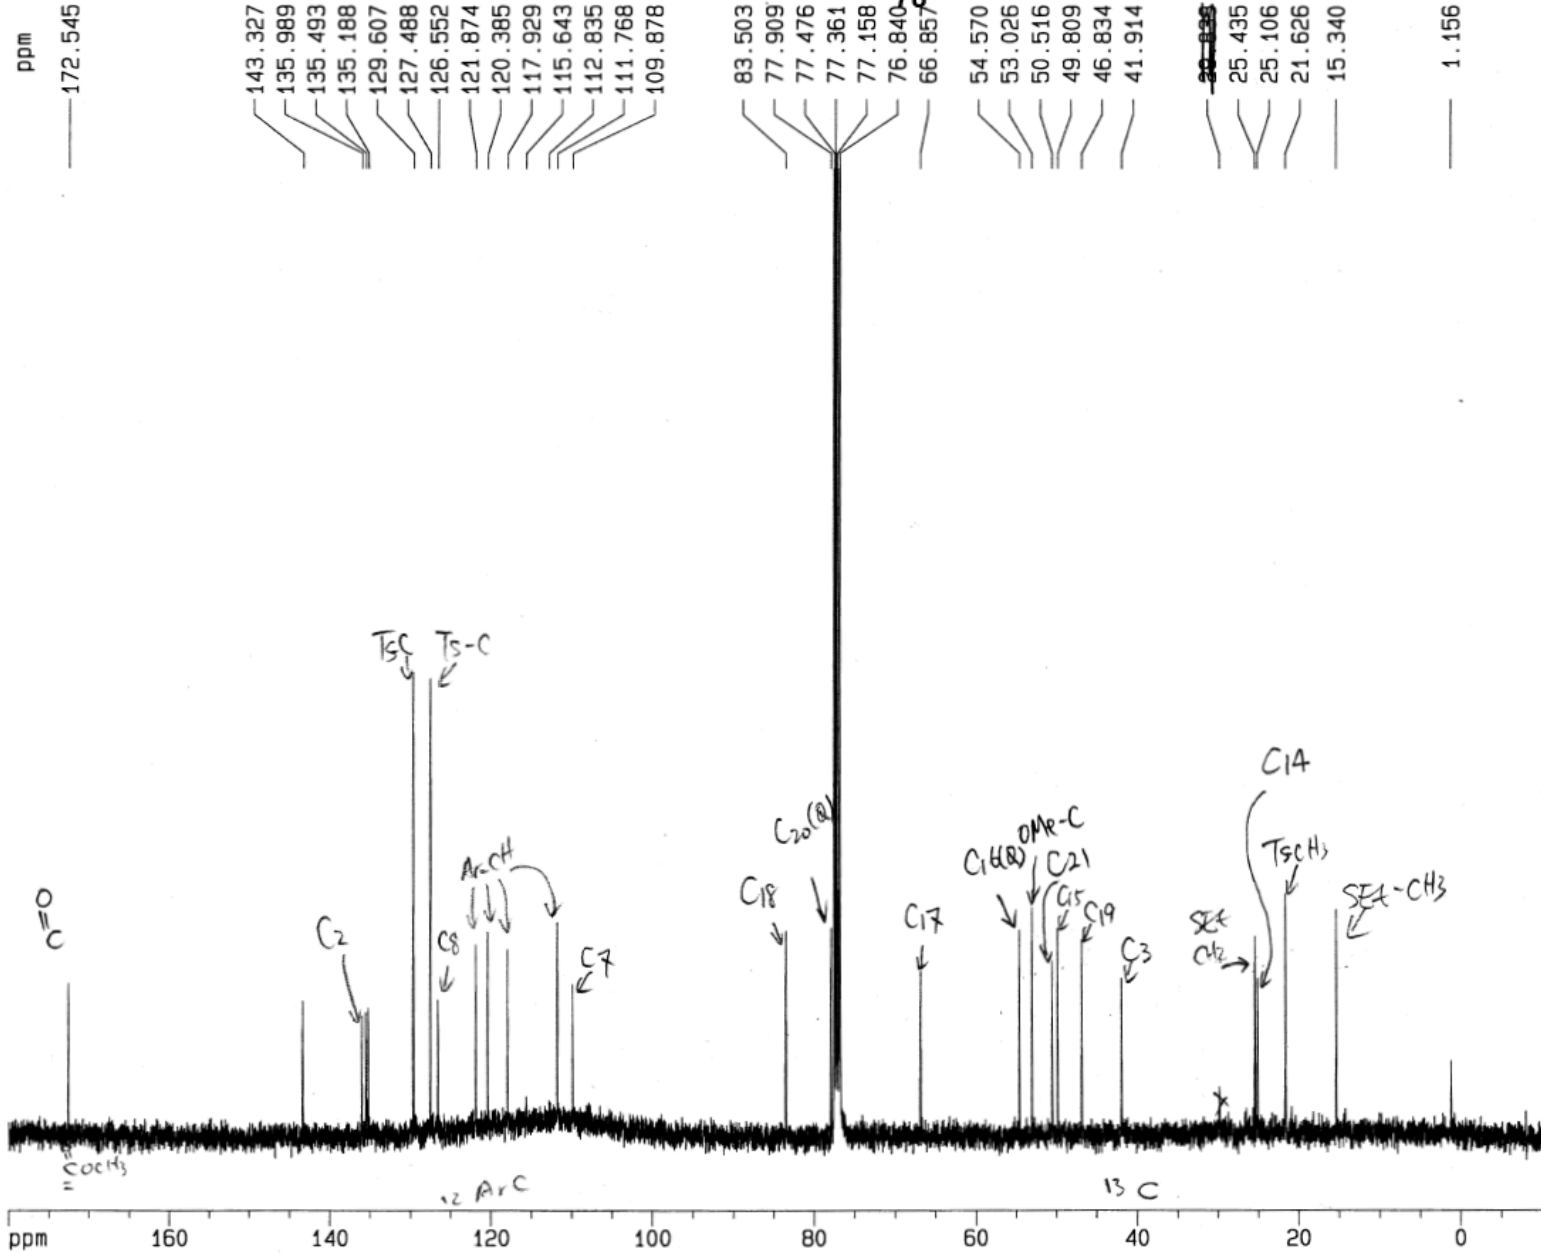

Current Data Parameters  
 NAME 070313JV-200P  
 EXPNO 7  
 PROCNO 1

F2 - Acquisition Parameters  
 Date\_ 20130704  
 Time 6.14  
 INSTRUM spect  
 PROBHD 5 mm BBI 1H-  
 PULPROG zgpg30  
 TD 65536  
 SOLVENT CDC13  
 NS 8192  
 DS 4  
 SWH 25125.629 Hz  
 FIDRES 0.383387 Hz  
 AQ 1.3042164 sec  
 RG 16384  
 DW 19.900 usec  
 DE 6.00 usec  
 TE 300.0 K  
 D1 2.00000000 sec  
 D11 0.03000000 sec  
 D12 0.00002000 sec

===== CHANNEL f1 =====  
 NUC1 13C  
 P1 16.35 usec  
 PL1 -6.00 dB  
 SF01 100.6237959 MHz

===== CHANNEL f2 =====  
 CPDPRG2 waltz16  
 NUC2 1H  
 PCPD2 114.00 usec  
 PL2 0.00 dB  
 PL12 24.00 dB  
 PL13 24.00 dB  
 SF02 400.1316005 MHz

F2 - Processing parameters  
 SI 32768  
 SF 100.6127585 MHz  
 WDM EM  
 SSB 0  
 LB 1.00 Hz  
 GB 0  
 PC 1.40

1D NMR plot parameters  
 CX 20.00 cm  
 F1P 180.000 ppm  
 F1 18110.29 Hz  
 F2P -10.000 ppm  
 F2 -1006.13 Hz  
 PPMCM 9.50000 ppm/cm  
 HZCM 955.82117 Hz/cm

HMGC

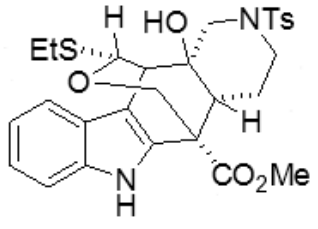

78

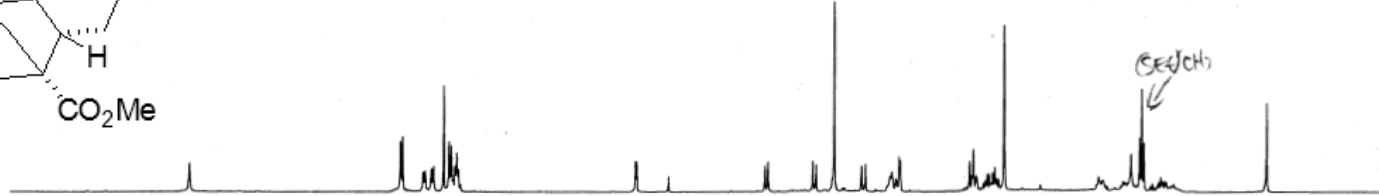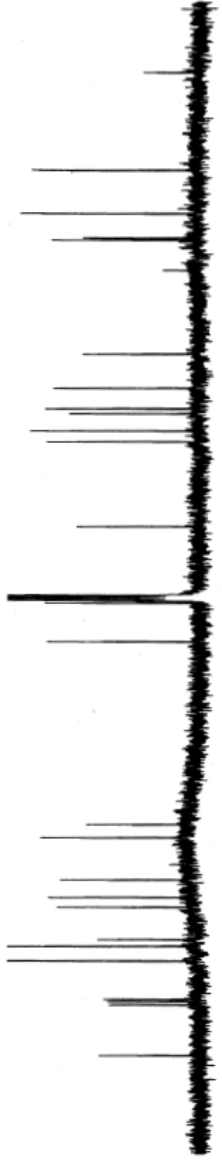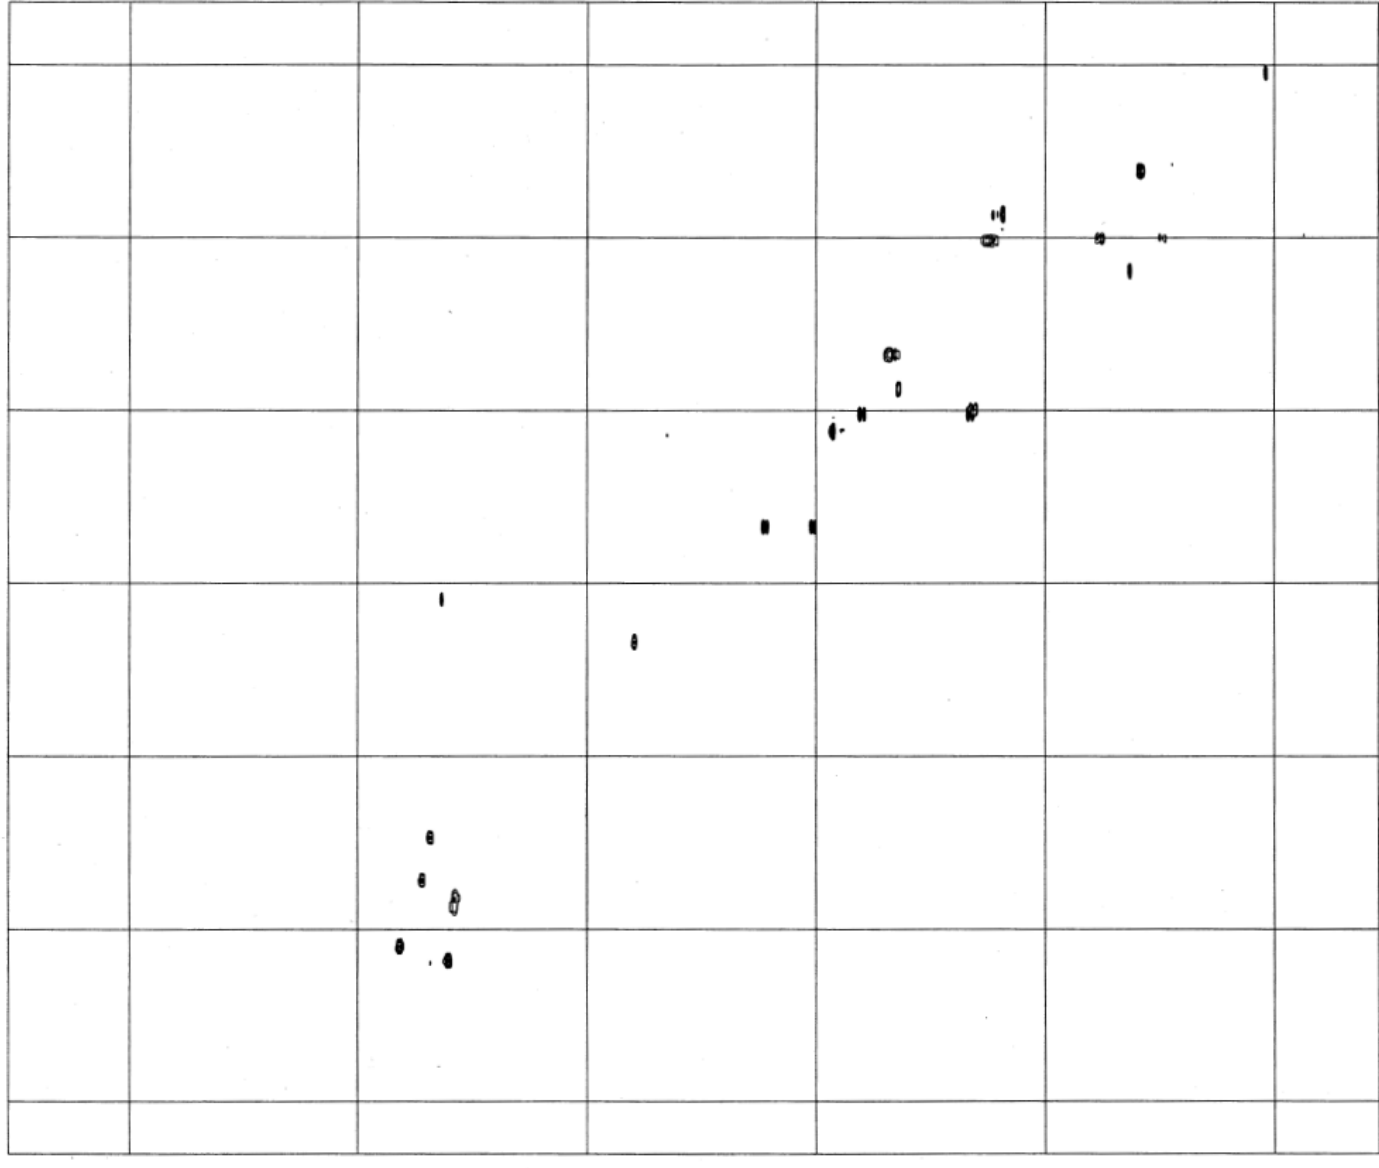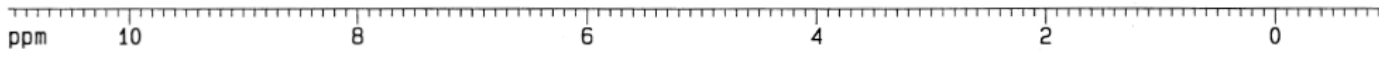

Current Data Parameters  
Date\_ 070319 JV-200P  
EXPNO 3  
PROCNO 1

F2 - Acquisition Parameters  
Date\_ 20190703  
Time 17:22  
INSTRUM spect  
PROBHD 5 mm BBI 1H-  
PULPROG InvAgg1p  
TD 2648  
SOLVENT CDCl3  
NS 4  
DS 8  
SWH 4789.272 Hz  
FIDRES 2.338612 Hz  
AQ 0.2138612 sec  
RG 14896.5  
DN 104.400 usec  
DE 5.00 usec  
TE 300.0 K  
D0 0.0000300 sec  
D1 1.89631298 sec  
D2 0.00346000 sec  
d4 0.00172500 sec  
D11 0.03000000 sec  
D13 0.00000300 sec  
D16 0.00020000 sec  
d20 0.00052500 sec  
d21 0.00224800 sec  
D30 0.00001400 sec

----- CHANNEL f1 -----  
NUC1 1H  
P1 7.50 usec  
P2 15.24 usec  
PL1 0.00 dB  
SFO1 400.1320391 MHz

----- CHANNEL f2 -----  
CPDPRG2 gprg  
NUC2 13C  
P3 17.00 usec  
P4 34.00 usec  
PCPD2 64.00 usec  
PL2 -6.00 dB  
PL12 6.30 dB  
SFO2 100.6202332 MHz

----- GRADIENT CHANNEL --  
GPMAX1 SINE.100  
GPMAX2 SINE.100  
GPMAX3 SINE.100  
GPK1 0.00 %  
GPK2 0.00 %  
GPK3 0.00 %  
GPY1 0.00 %  
GPY2 0.00 %  
GPY3 0.00 %  
GPE1 17.00 %  
GPE2 20.00 %  
GPE3 25.00 %  
P16 1000.00 usec

F1 - Acquisition parameters  
NUC 13C  
TD 128  
SFO1 100.6202 MHz  
FIDRES 131.862214 Hz  
DS 106.751 ppe

F2 - Processing parameters  
SI 2048  
SF 400.1320395 MHz  
WDW 05SINE  
SSB 2  
LB 0.00 Hz  
GB 0  
PC 1.00

F1 - Processing parameters  
SI 1024  
TRF1  
MC2  
SF 100.6127577 MHz  
WDW 05SINE  
SSB 2  
LB 0.00 Hz  
GB 0

2D NMR plot parameters  
CX2 18.00 cm  
CX3 15.00 cm  
F1P0 11.959 ppm  
F2L0 4425.15 Hz  
F2P0 -0.910 ppe  
F2H0 -364.13 Hz  
F1P10 157.581 ppm  
F1L0 15654.76 Hz  
F1P12 -9.082 ppe  
F1H1 -913.76 Hz  
F2P10CM 0.86486 ppm/cm  
F1H2CM 265.07088 Hz/cm  
F1P10CM 11.11756 ppm/cm  
F1H2CM 1118.56824 Hz/cm

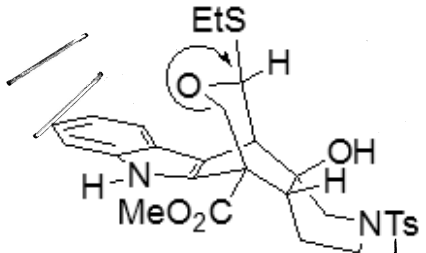

Key HMBC correlations for 78

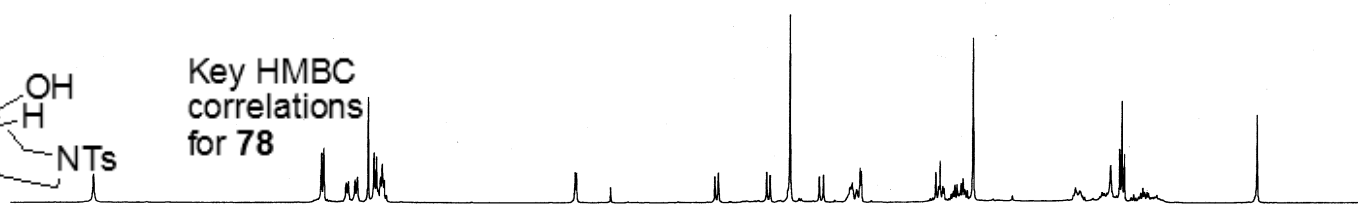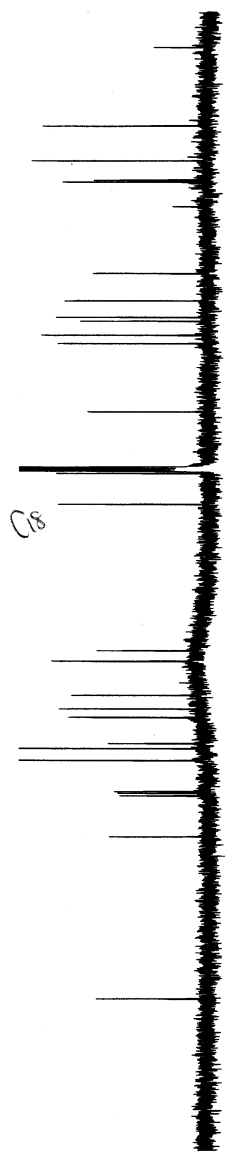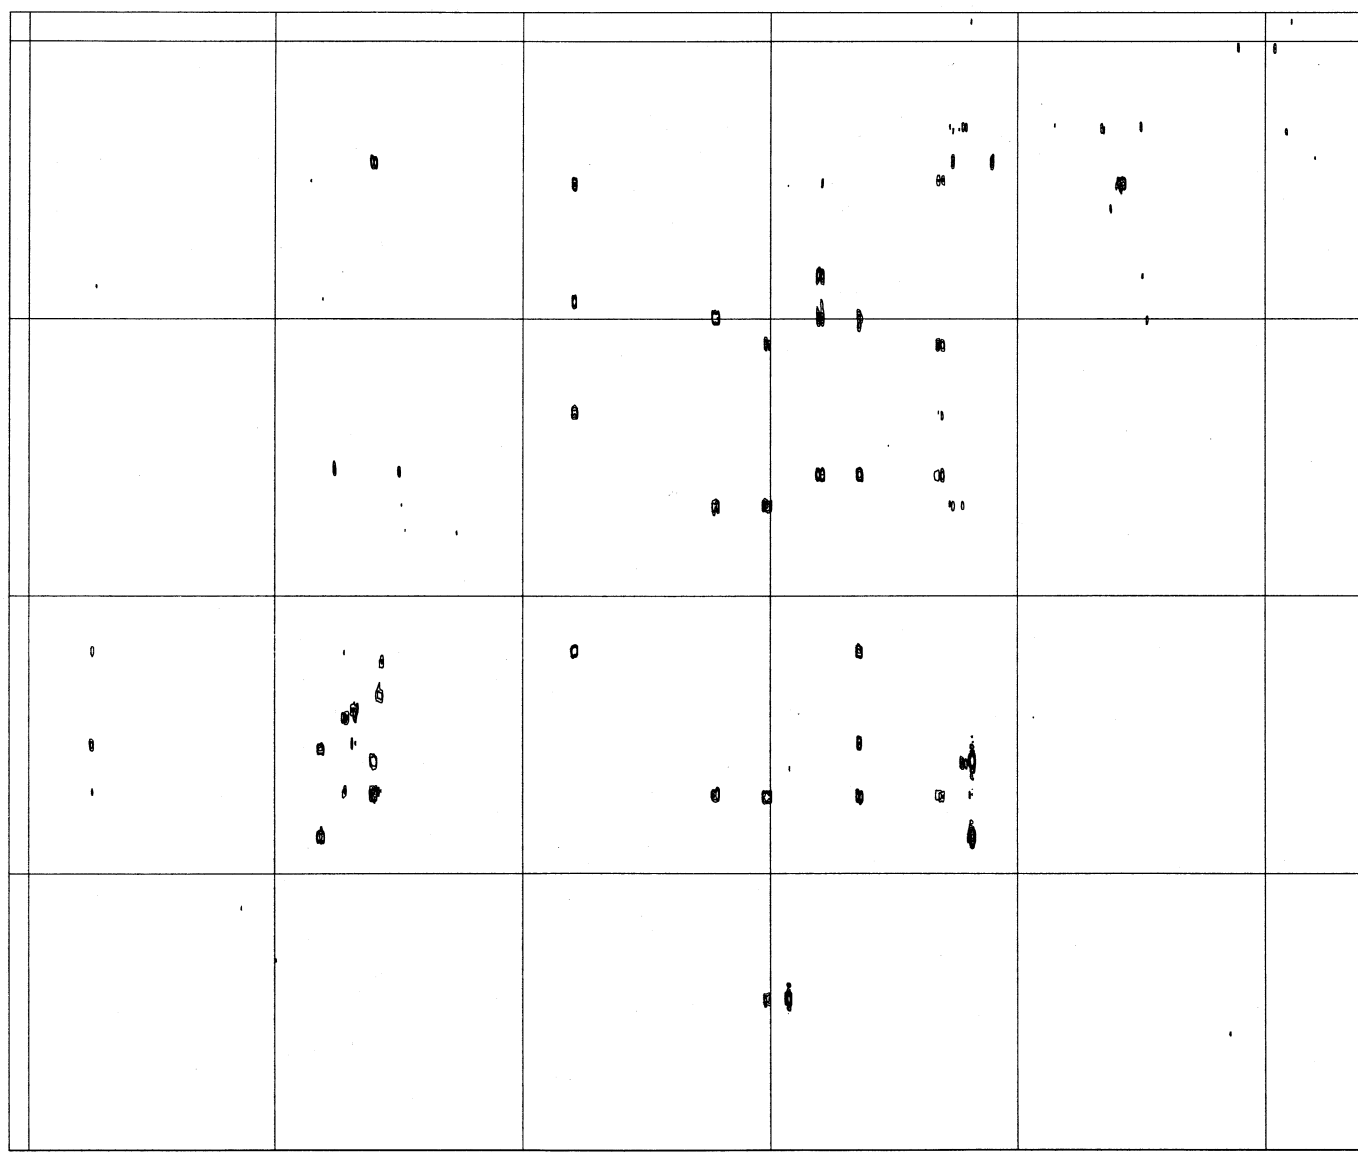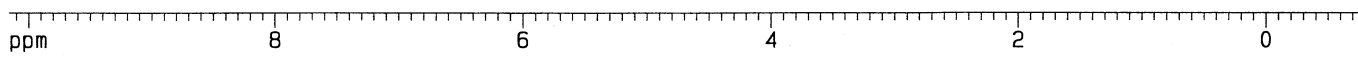

Current Data Param  
 NAME 070313FJV-200P  
 EXPNO 4  
 PROCNO 1

F2 - Acquisition Para  
 Date\_ 20130703  
 Time 17.42  
 INSTRUM spect  
 PROBHD 5 mm BBI 1H-  
 PULPROG inv4gsiplrncd  
 TD 2048  
 SOLVENT CDCl3  
 NS 8  
 DS 16  
 SMH 4789.272 Hz  
 FIDRES 2.338512 Hz  
 AQ 0.2138512 sec  
 RG 16384  
 DW 104.400 usec  
 DE 6.00 usec  
 TE 300.0 K  
 D0 0.0000300 sec  
 D1 1.5000000 sec  
 D2 0.00345000 sec  
 D6 0.06500000 sec  
 D13 0.00003000 sec  
 D16 0.00020000 sec  
 INO 0.00002240 sec

----- CHANNEL f1 ----  
 NUC1 1H  
 P1 7.62 usec  
 P2 15.24 usec  
 PL1 0.00 dB  
 SFO1 400.1320391 MHz

----- CHANNEL f2 ----  
 NUC2 13C  
 P3 17.00 usec  
 PL2 -6.00 dB  
 SFO2 100.6227351 MHz

----- GRADIENT CHAN ----  
 P16 1000.00 usec

F1 - Acquisition para  
 ND0 2  
 TD 128  
 SFO1 100.6227 MHz  
 FIDRES 174.386154 Hz  
 SW 221.633 ppb

F2 - Processing para  
 SI 2048  
 SF 400.1300090 MHz  
 WDM SINE  
 SSB 0  
 LB 0.00 Hz  
 GB 0  
 PC 1.40

F1 - Processing para  
 SI 1024  
 MC2 GF  
 SF 100.6127346 MHz  
 WDM SINE  
 SSB 0  
 LB 0.00 Hz  
 GB 0

2D NMR plot param  
 CX2 18.00 cm  
 CX1 15.00 cm  
 F2PLO 10.158 ppb  
 F2LO 4064.61 Hz  
 F2PHI -0.812 ppb  
 F2HI -324.78 Hz  
 F1PLO 200.141 ppb  
 F1LO 20136.68 Hz  
 F1PHI -5.249 ppb  
 F1HI -528.08 Hz  
 F2PPMCM 0.60944 ppb  
 F2HZCM 243.85481 Hz  
 F1PPMCM 13.69261 ppb  
 F1HZCM 1377.65076 Hz

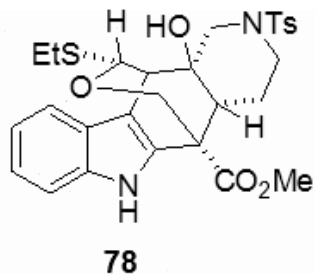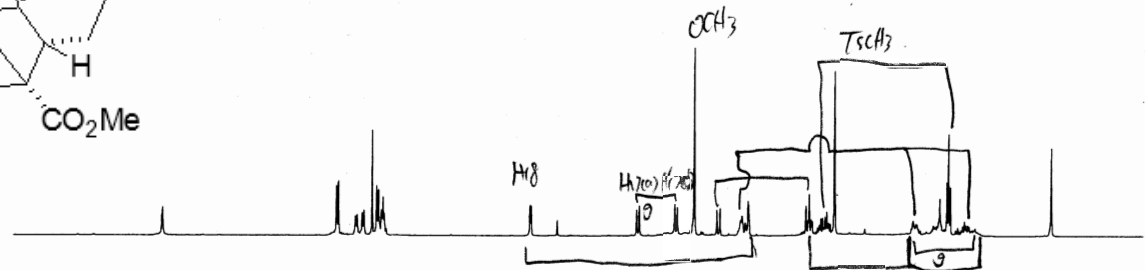

*1/4 intensity  
all*

FGY-V-200P gCOSY

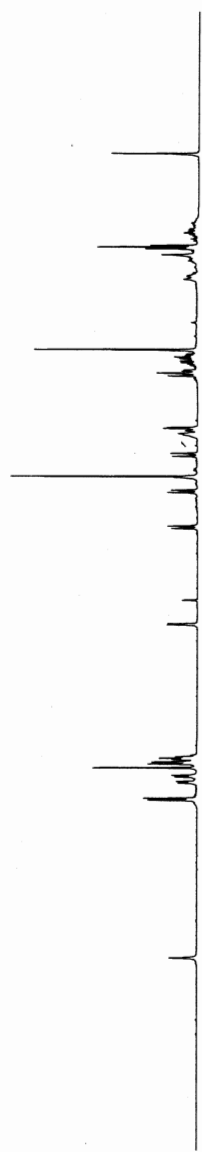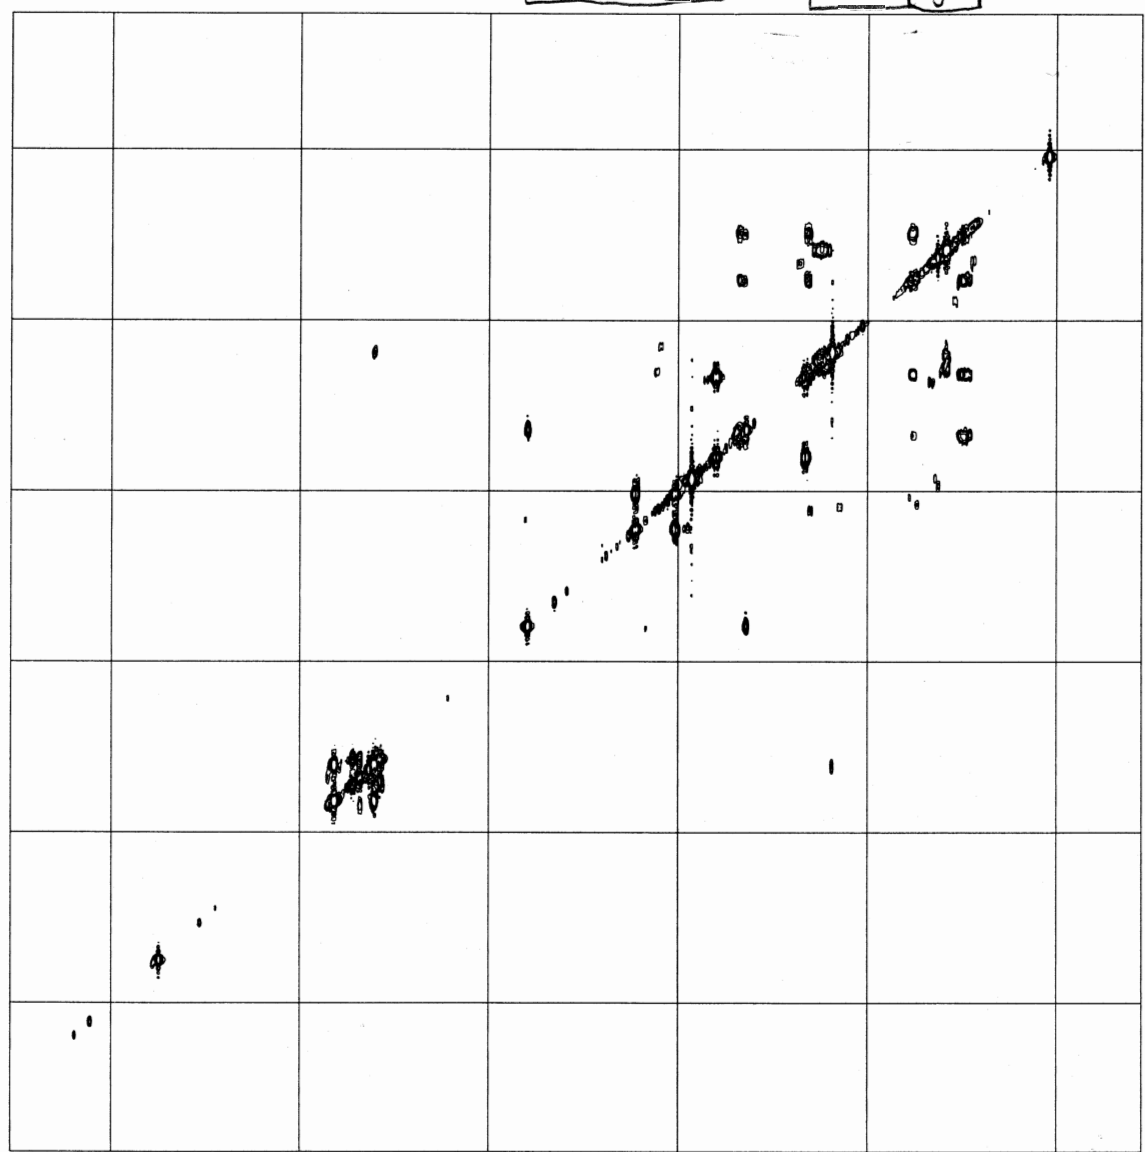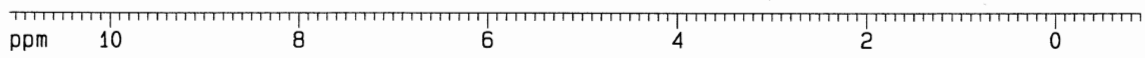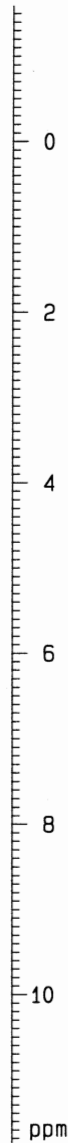

```

Current Data Parameters
NAME 070313FJV-200P
EXPNO 8
PROCNO 1

F2 - Acquisition Parameters
Date_ 20130704
Time 8.25
INSTRUM spect
PROBHD 5 mm BBI 1H-
PULPROG cosypp
TD 2048
SOLVENT CDC13
NS 4
DS 8
SMH 4789.272 Hz
FIDRES 2.338512 Hz
AQ 0.2138612 sec
RG 203.2
DW 104.400 usec
DE 6.00 usec
TE 300.0 K
DO 0.00000300 sec
D1 1.50000000 sec
D13 0.00000300 sec
D16 0.00200000 sec
IN0 0.0018720 sec

----- CHANNEL f1 -----
NUC1 1H
P0 6.45 usec
P1 7.62 usec
PL1 0.00 dB
SFO1 400.1320391 MHz

----- GRADIENT CHANNEL -----
GPNAM1 SINE.100
GPNAM2 SINE.100
GPX1 0.00 %
GPX2 0.00 %
GPY1 0.00 %
GPY2 0.00 %
GPZ1 10.00 %
GPZ2 10.00 %
P16 1000.00 usec

F1 - Acquisition parameters
ND0 1
TD 128
SFO1 400.132 MHz
FIDRES 41.733440 Hz
SW 13.350 ppm

F2 - Processing parameters
SI 1024
SF 400.1300059 MHz
WDW SINE
SSB 0
LB 0.00 Hz
GB 0
PC 1.40

F1 - Processing parameters
SI 1024
WF 0F
SF 400.1300048 MHz
WDW SINE
SSB 0
LB 0.00 Hz
GB 0

2D NMR plot parameters
CX2 15.00 cm
CX1 15.00 cm
F2PLO 11.066 ppm
F2LO 4427.76 Hz
F2PHI -0.903 ppm
F2HI -361.51 Hz
F1PLO 11.759 ppm
F1LO 4705.22 Hz
F1PHI -1.551 ppm
F1HI -536.66 Hz
F2PRMCM 0.79795 ppm/cm
F2HZCM 319.28479 Hz/cm
F1PRMCM 0.89002 ppm/cm
F1HZCM 356.12537 Hz/cm
    
```

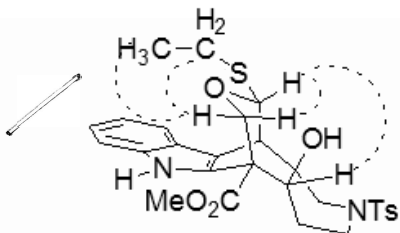

----- :Key nOe  
Correlations for 78

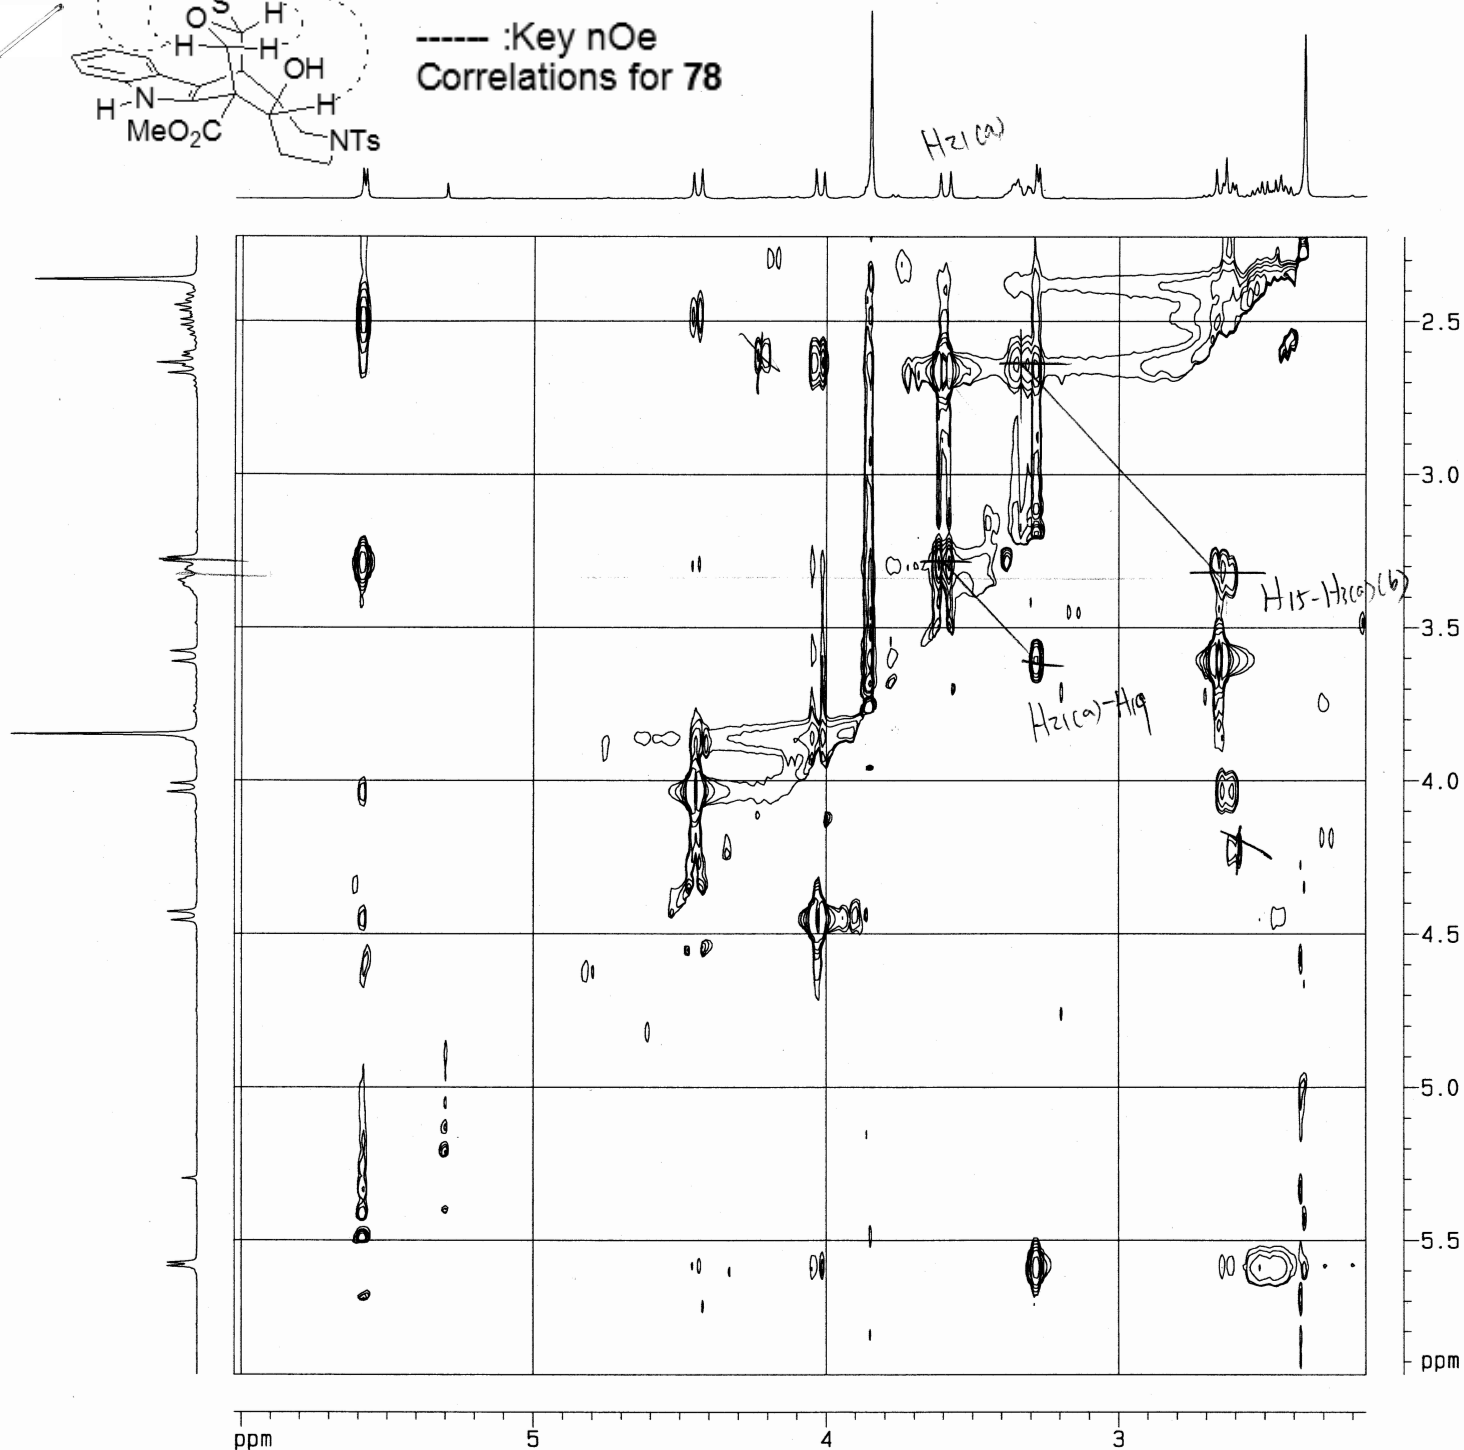

Current Data Param  
NAME 070313FJV-200P  
EXPNO 6  
PROCNO 1

F2 - Acquisition Param  
Date\_ 20130703  
Time 20.01  
INSTRUM spect  
PROBHD 5 mm BBI 1H-  
PULPROG noesygptp  
TD 2048  
SOLVENT CDC13  
NS 8  
DS 16  
SMH 4789.272 Hz  
FIDRES 2.338512 Hz  
AQ 0.2138612 sec  
RG 228.1  
DW 104.400 use  
DE 6.00 use  
TE 300.0 K  
D0 0.0000300 sec  
D1 4.0000000 sec  
D8 0.5000000 sec  
D16 0.0002000 sec  
d20 0.2487999 sec  
INO 0.00012240 sec

----- CHANNEL f1 -----  
NUC1 1H  
P1 7.62 use  
P2 15.24 use  
PL1 0.00 dB  
SF01 400.1320391 MHz

----- GRADIENT CHANN -----  
GPNAM1 SINE.100  
GPNAM2 SINE.100  
GPX1 0.00 %  
GPX2 0.00 %  
GPY1 0.00 %  
GPY2 0.00 %  
GPZ1 40.00 %  
GPZ2 -40.00 %  
P16 1000.00 use

F1 - Acquisition param  
ND0 2  
TD 256  
SF01 400.132 MHz  
FIDRES 15.956803 Hz  
SW 10.209 ppr

F2 - Processing param  
SI 1024  
SF 400.1300076 MHz  
WDW QSINE  
SSB 2  
LB 0.00 Hz  
GB 0  
PC 1.40

F1 - Processing param  
SI 1024  
MC2 TRF1  
SF 400.1300064 MHz  
WDW QSINE  
SSB 2  
LB 0.00 Hz  
GB 0

2D NMR plot param  
CX2 15.00 cm  
CX1 15.00 cm  
F2PLO 6.024 ppr  
F2L0 2410.35 Hz  
F2PHI 2.155 ppr  
F2H1 862.25 Hz  
F1PLO 5.942 ppr  
F1L0 2377.72 Hz  
F1PHI 2.224 ppr  
F1H1 889.74 Hz  
F2PPMCM 0.25793 ppr  
F2HZCM 103.20631 Hz/  
F1PPMCM 0.24792 ppr  
F1HZCM 99.19875 Hz/

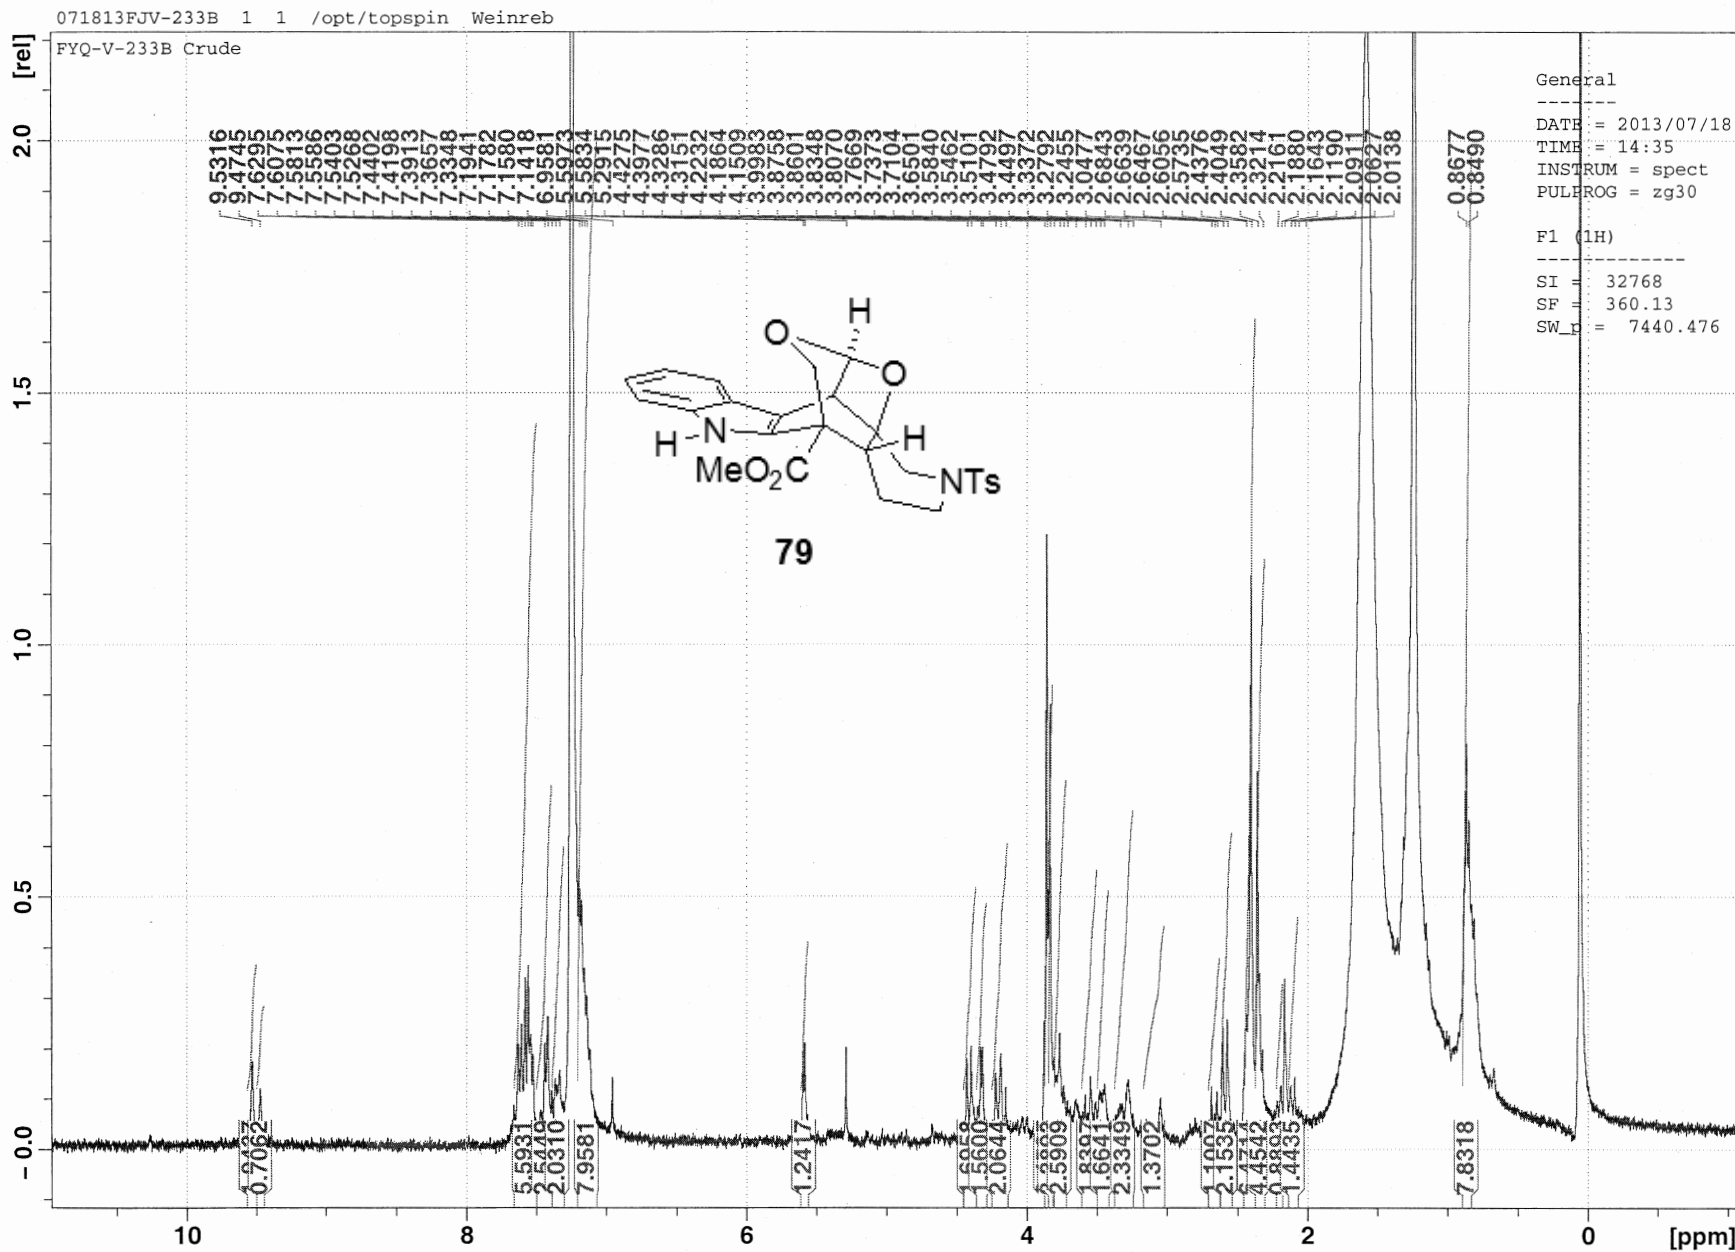

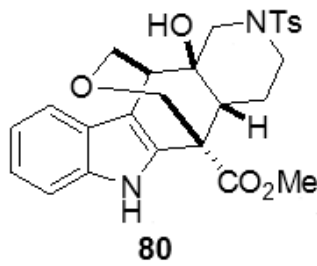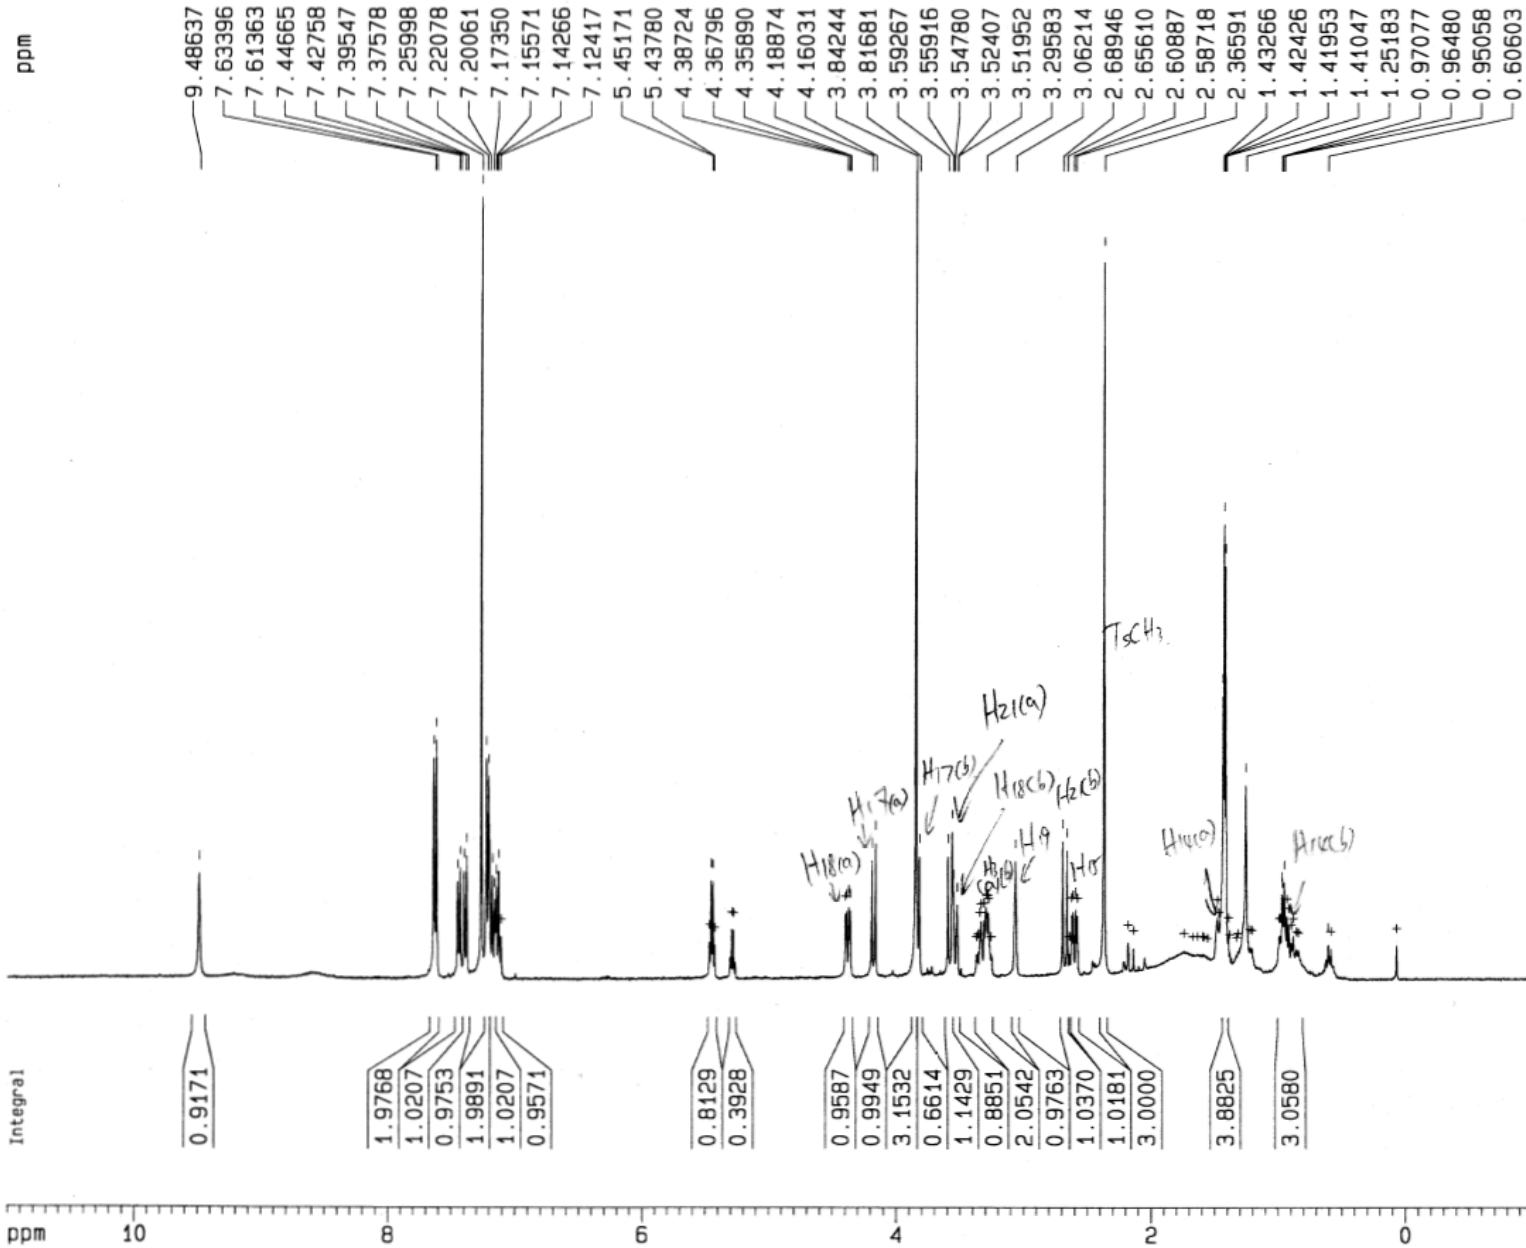

Current Data Parameters  
 NAME 080713FJV-274  
 EXPNO 1  
 PROCNO 1

F2 - Acquisition Parameters  
 Date\_ 20130807  
 Time 15.21  
 INSTRUM spect  
 PROBHD 5 mm BBI 1H-  
 PULPROG zg30  
 TD 65536  
 SOLVENT CDC13  
 NS 16  
 DS 2  
 SWH 8278.146 Hz  
 FIDRES 0.126314 Hz  
 AQ 3.9584243 sec  
 RG 1024  
 DW 60.400 usec  
 DE 6.00 usec  
 TE 300.0 K  
 D1 1.00000000 sec

===== CHANNEL f1 =====  
 NUC1 1H  
 P1 6.45 usec  
 PL1 0.00 dB  
 SF01 400.1324710 MHz

F2 - Processing parameters  
 SI 32768  
 SF 400.1300096 MHz  
 WDW EM  
 SSB 0  
 LB 0.30 Hz  
 GB 0  
 PC 1.00

1D NMR plot parameters  
 CX 20.00 cm  
 F1P 11.000 ppm  
 F1 4401.43 Hz  
 F2P -1.000 ppm  
 F2 -400.13 Hz  
 PPMCM 0.60000 ppm/cm  
 HZCM 240.07800 Hz/cm



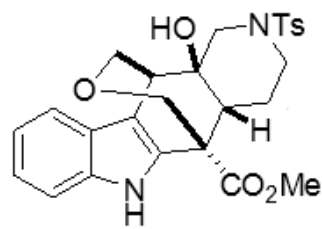

80

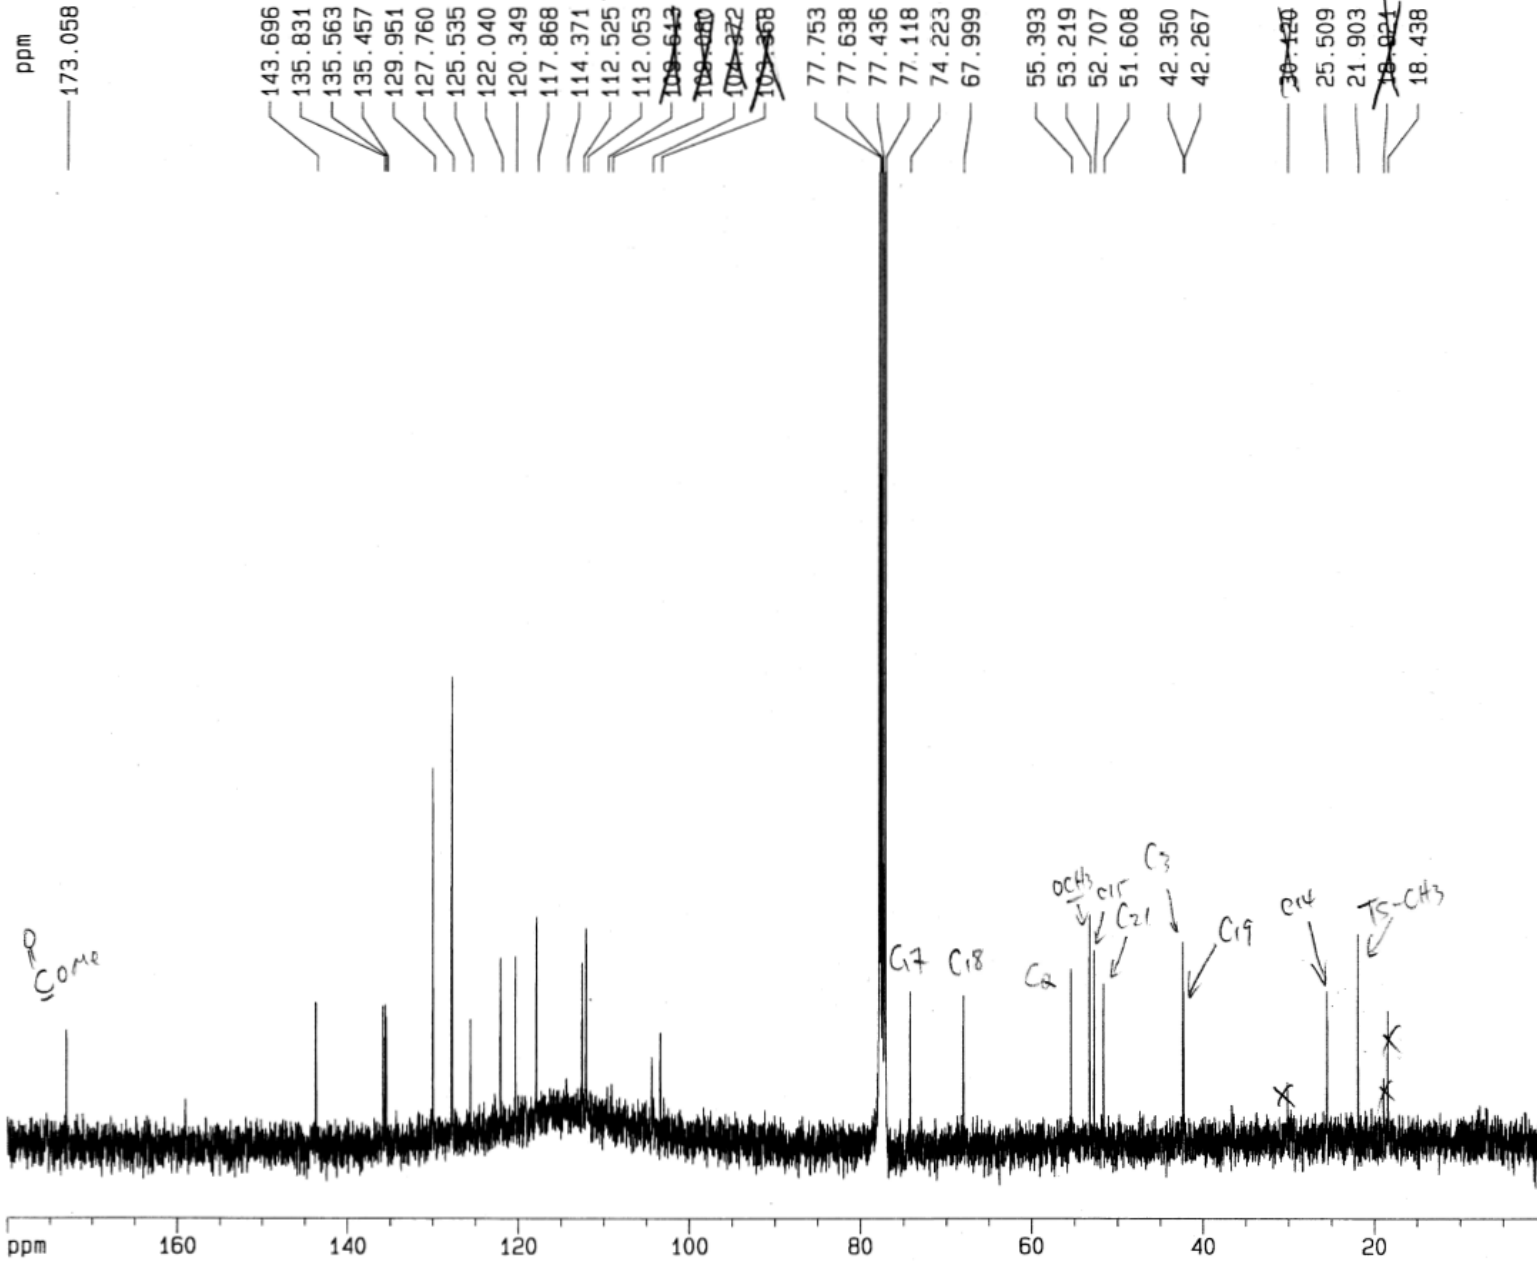

Current Data Parameters  
 NAME 080713FJV-274T  
 EXPNO 7  
 PROCNO 1

F2 - Acquisition Parameters  
 Date\_ 20130808  
 Time 7.32  
 INSTRUM spect  
 PROBHD 5 mm BBI 1H-  
 PULPROG zgpg30  
 TD 65536  
 SOLVENT CDC13  
 NS 10240  
 DS 4  
 SWH 25125.629 Hz  
 FIDRES 0.383387 Hz  
 AQ 1.3042164 sec  
 RG 16384  
 DW 19.900 usec  
 DE 6.00 usec  
 TE 300.0 K  
 D1 2.00000000 sec  
 D11 0.03000000 sec  
 D12 0.00002000 sec

===== CHANNEL f1 =====  
 NUC1 13C  
 P1 16.35 usec  
 PL1 -6.00 dB  
 SF01 100.6237959 MHz

===== CHANNEL f2 =====  
 CPDPRG2 waltz16  
 NUC2 1H  
 PCPD2 114.00 usec  
 PL2 0.00 dB  
 PL12 24.00 dB  
 PL13 24.00 dB  
 SF02 400.1316005 MHz

F2 - Processing parameters  
 SI 32768  
 SF 100.6127290 MHz  
 WDW EM  
 SSB 0  
 LB 1.00 Hz  
 GB 0  
 PC 1.40

1D NMR plot parameters  
 CX 20.00 cm  
 F1P 180.000 ppm  
 F1 18110.29 Hz  
 F2P 0.000 ppm  
 F2 0.00 Hz  
 PPMCM 9.00000 ppm/cm  
 HZCM 905.51459 Hz/cm

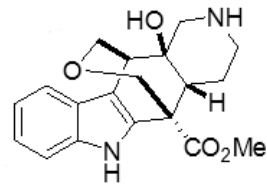

FYQ-V-294 w/ TFA

(±)-alstilobanine E (2)

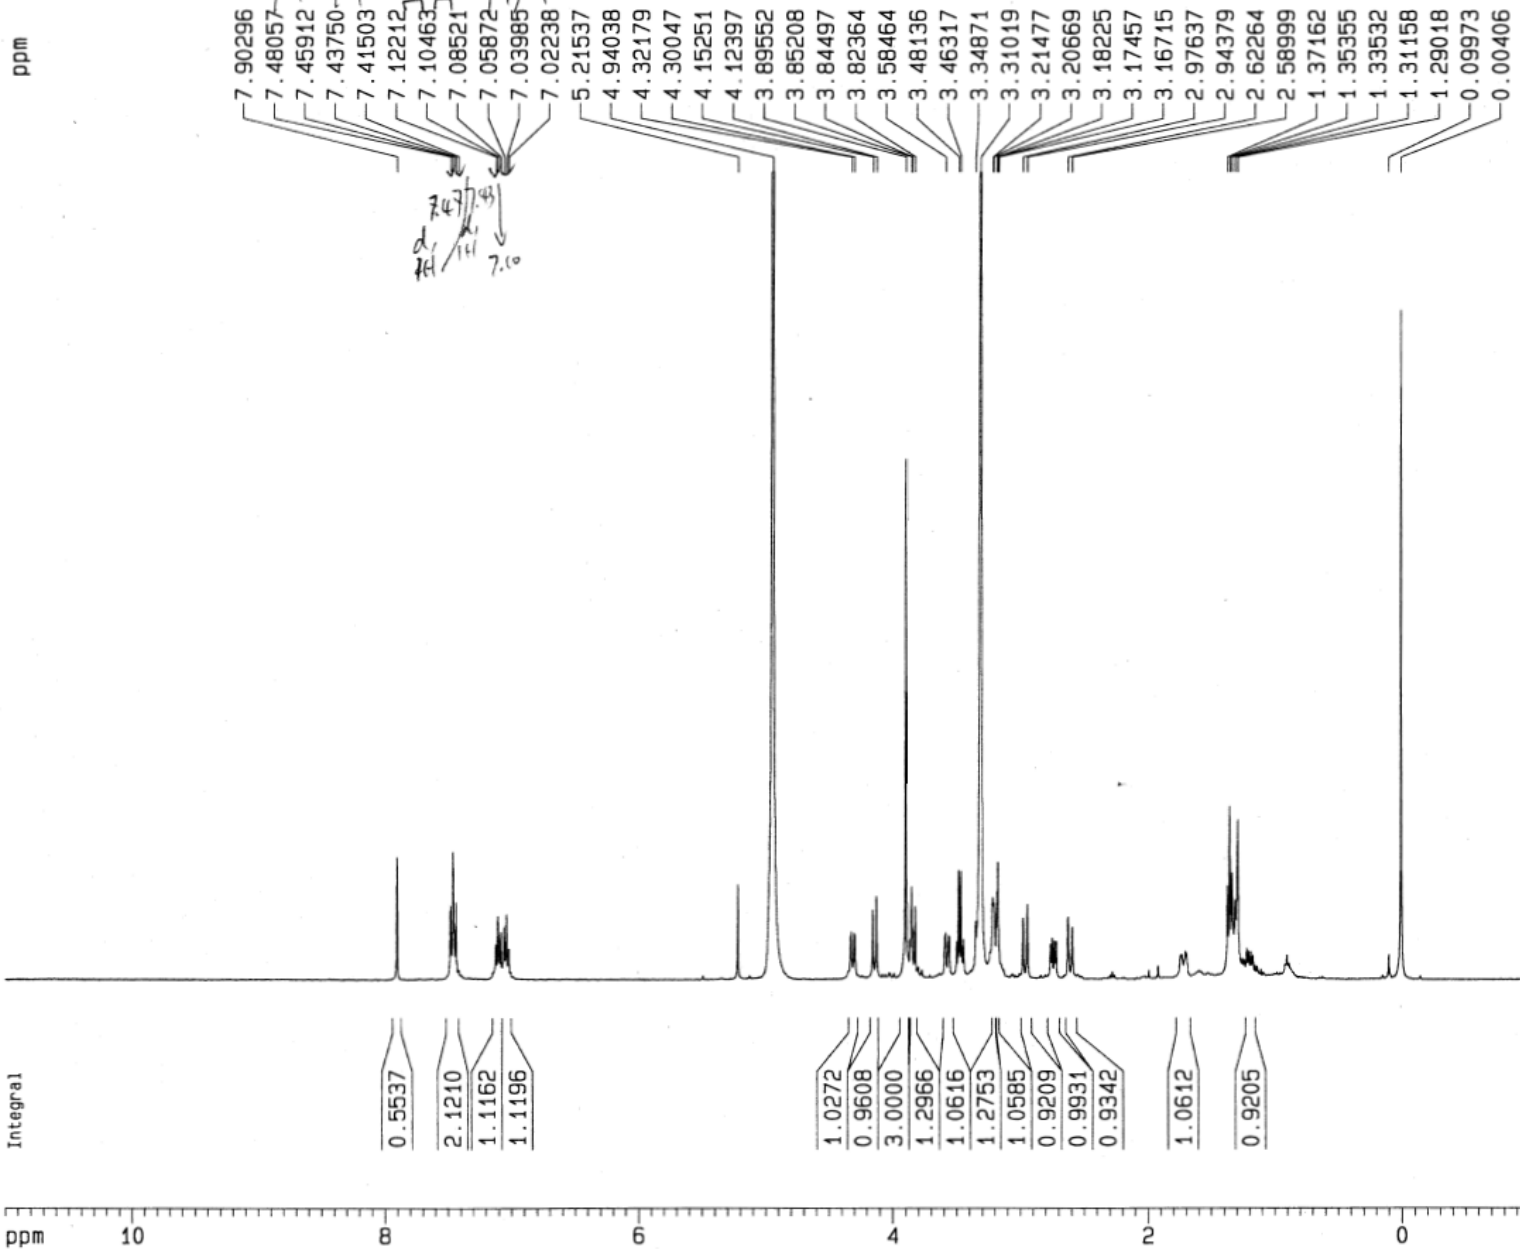

Current Data Parameters  
 NAME 090513FJV-294  
 EXPNO 1  
 PROCNO 1

F2 - Acquisition Parameters  
 Date\_ 20130905  
 Time 10.34  
 INSTRUM spect  
 PROBHD 5 mm BBI 1H-  
 PULPROG zg30  
 TD 65536  
 SOLVENT MeOH  
 NS 32  
 DS 2  
 SWH 8278.146 Hz  
 FIDRES 0.126314 Hz  
 AQ 3.9584243 sec  
 RG 456.1  
 DW 60.400 usec  
 DE 6.00 usec  
 TE 300.0 K  
 D1 1.00000000 sec

===== CHANNEL f1 =====  
 NUC1 1H  
 P1 6.45 usec  
 PL1 0.00 dB  
 SF01 400.1324710 MHz

F2 - Processing parameters  
 SI 32768  
 SF 400.1300074 MHz  
 WDW EM  
 SSB 0  
 LB 0.30 Hz  
 GB 0  
 PC 1.00

1D NMR plot parameters  
 CX 20.00 cm  
 F1P 11.000 ppm  
 F1 4401.43 Hz  
 F2P -1.000 ppm  
 F2 -400.13 Hz  
 PPMCM 0.60000 ppm/cm  
 HZCM 240.07800 Hz/cm

FYG-V-294 w/TFA C13

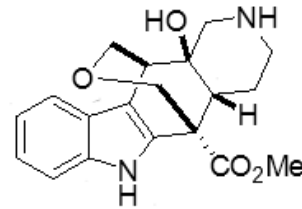

(±)-alstilobanine E (2)

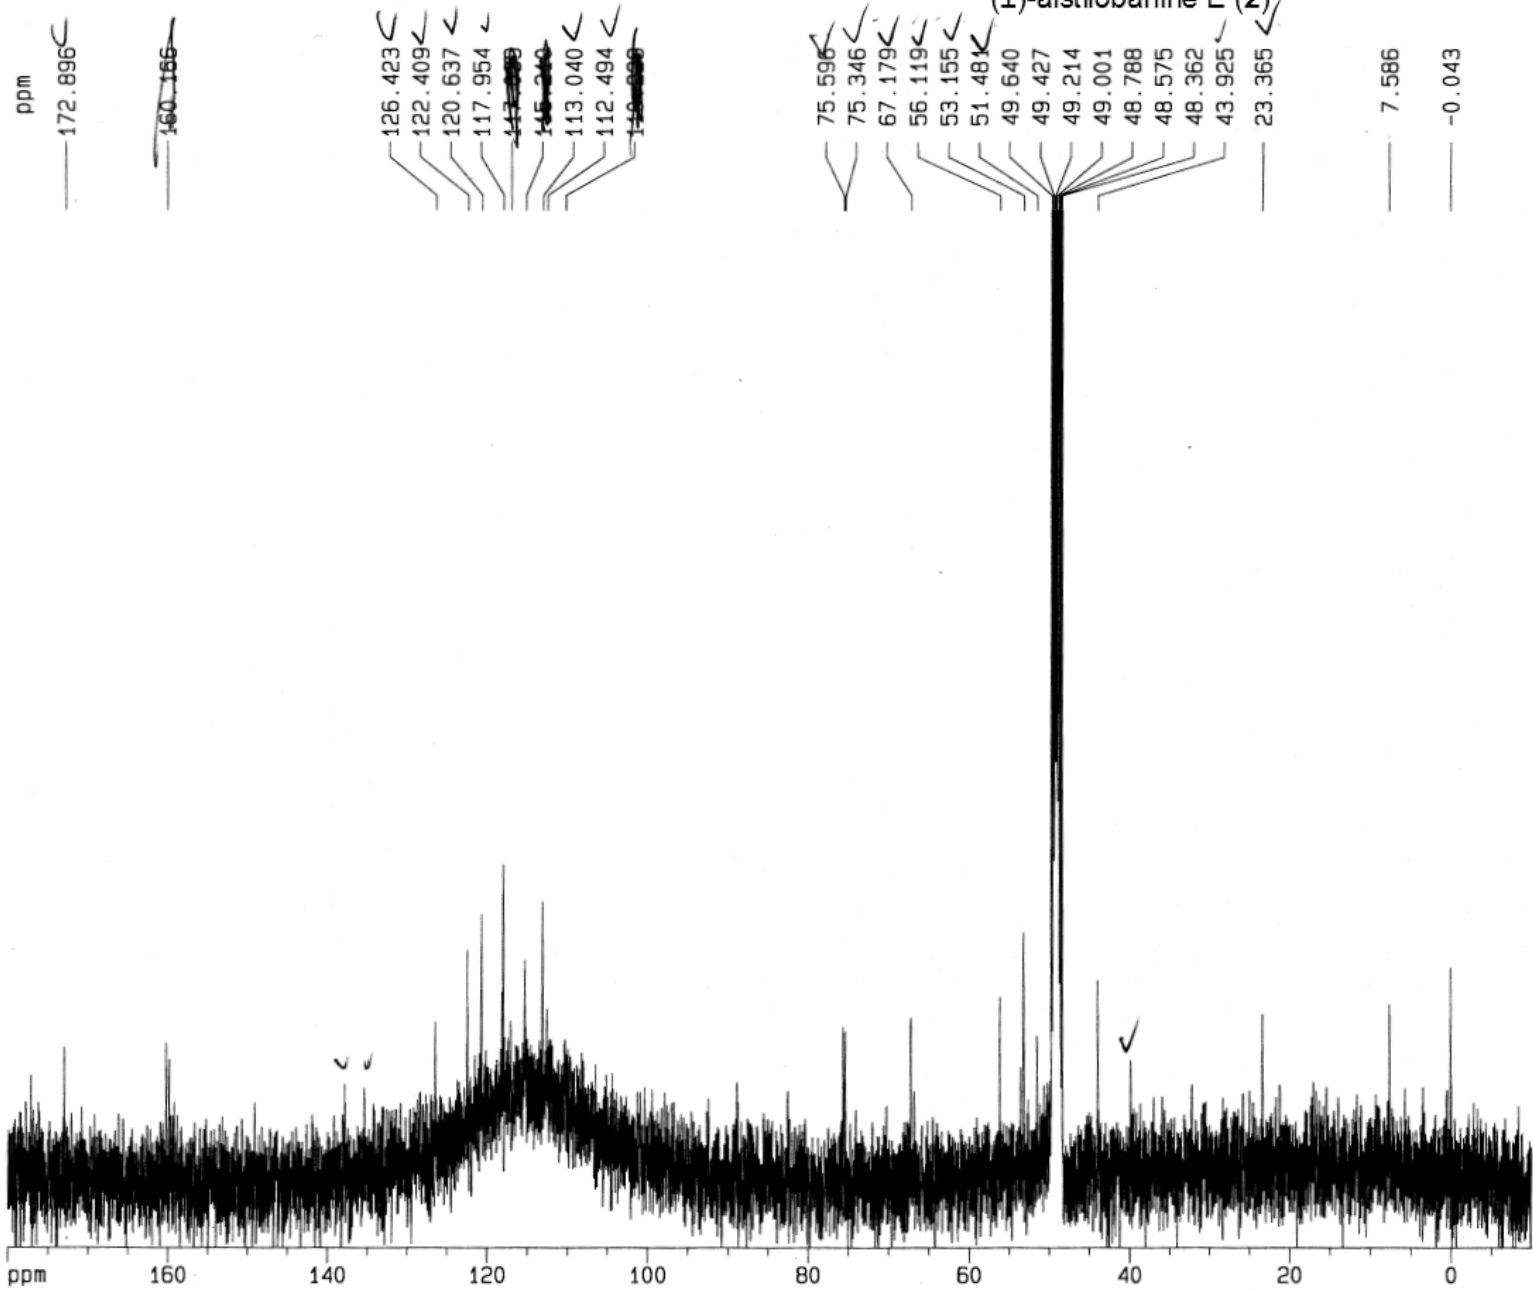

Current Data Parameters  
 NAME 090513FJV-294  
 EXPNO 4  
 PROCNO 1

F2 - Acquisition Parameters  
 Date\_ 20130906  
 Time 8.00  
 INSTRUM spect  
 PROBHD 5 mm BBI 1H-  
 PULPROG zgpg30  
 TD 65536  
 SOLVENT MeOH  
 NS 16384  
 DS 4  
 SWH 25125.629 Hz  
 FIDRES 0.383387 Hz  
 AQ 1.3042164 sec  
 RG 16384  
 DW 19.900 usec  
 DE 6.00 usec  
 TE 300.0 K  
 D1 2.00000000 sec  
 D11 0.03000000 sec  
 D12 0.00002000 sec

===== CHANNEL f1 =====  
 NUC1 13C  
 P1 16.35 usec  
 PL1 -6.00 dB  
 SF01 100.6237959 MHz

===== CHANNEL f2 =====  
 CPDPRG2 waltz16  
 NUC2 1H  
 PCPD2 114.00 usec  
 PL2 0.00 dB  
 PL12 24.00 dB  
 PL13 24.00 dB  
 SF02 400.1316005 MHz

F2 - Processing parameters  
 SI 32768  
 SF 100.6126267 MHz  
 WDW EM  
 SSB 0  
 LB 1.00 Hz  
 GB 0  
 PC 1.40

1D NMR plot parameters  
 CX 20.00 cm  
 F1P 180.000 ppm  
 F1 18110.27 Hz  
 F2P -10.000 ppm  
 F2 -1006.13 Hz  
 PPMCM 9.50000 ppm/cm  
 HZCM 955.81995 Hz/cm

FYQ-V-Angustilodine

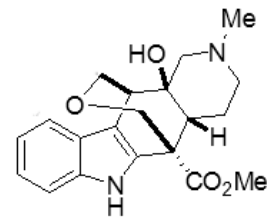

(±)-angustilodine (1)

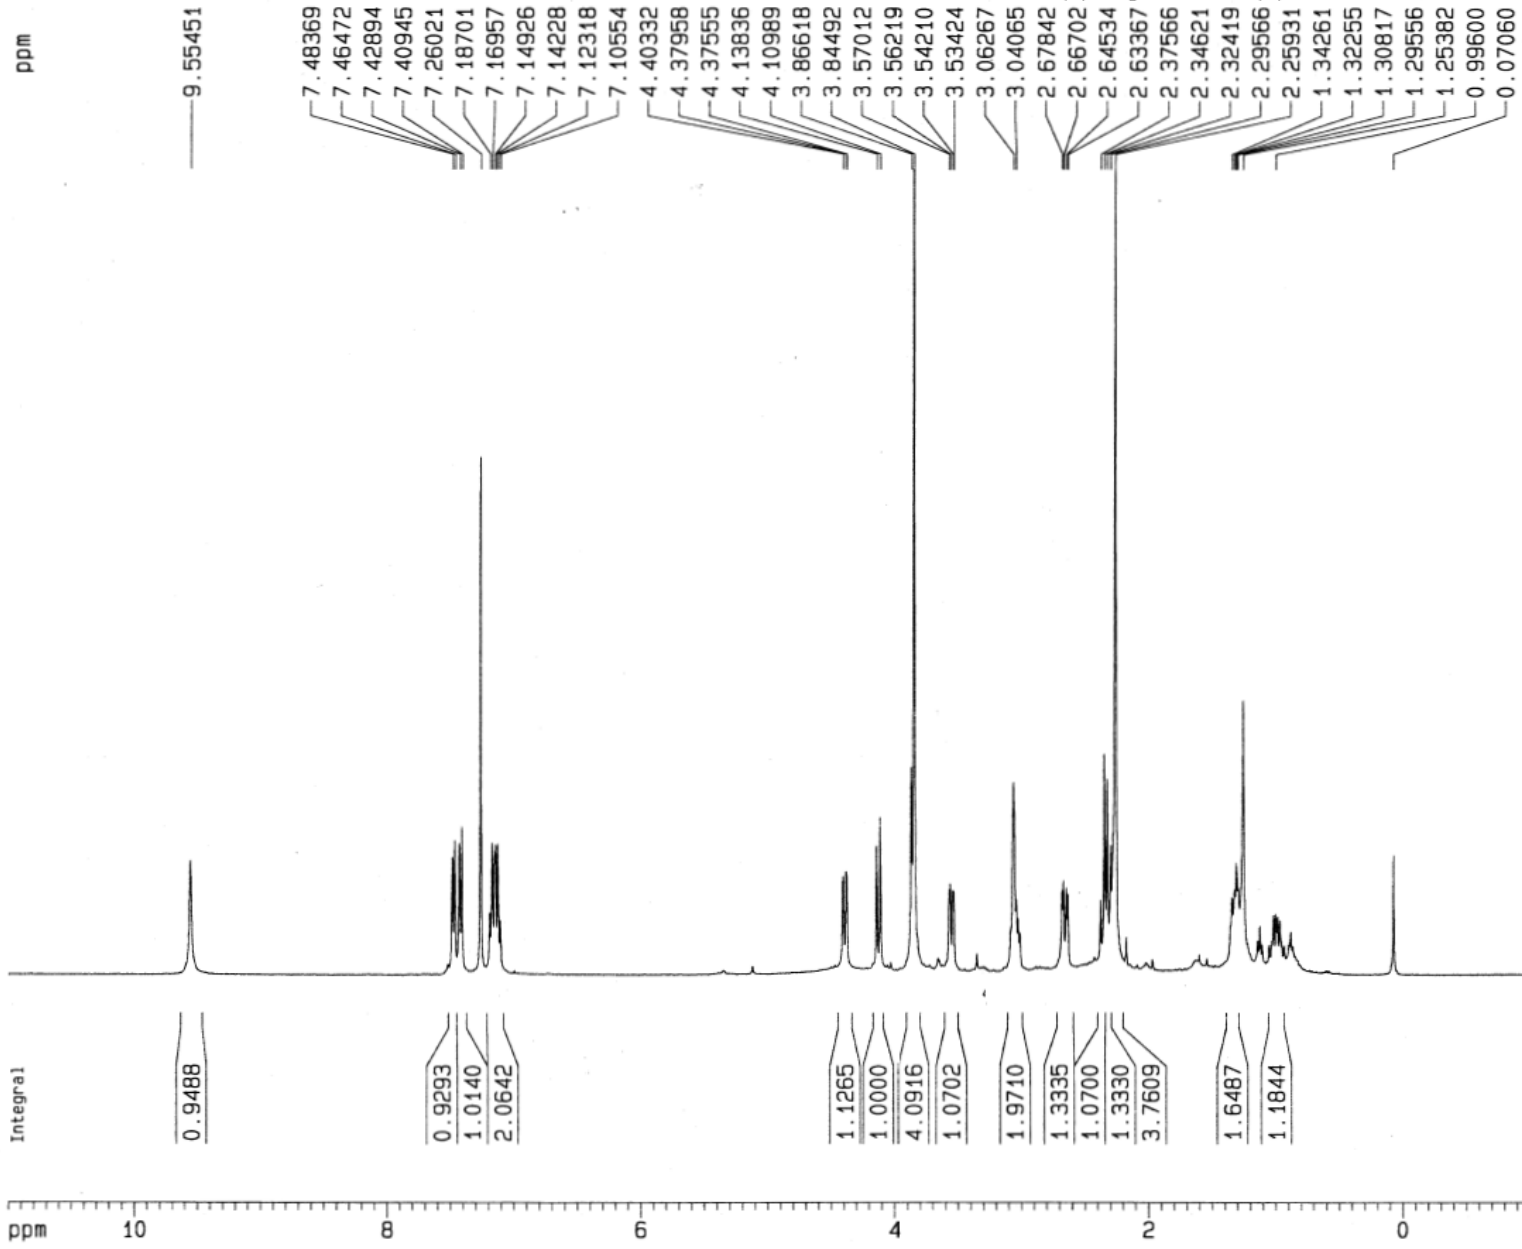

Current Data Parameters  
 NAME 091013FJV-295  
 EXPNO 1  
 PROCNO 1

F2 - Acquisition Parameters  
 Date\_ 20130910  
 Time 14.55  
 INSTRUM spect  
 PROBHD 5 mm BBI 1H-  
 PULPROG zg30  
 TD 65536  
 SOLVENT CDC13  
 NS 16  
 DS 2  
 SWH 8278.146 Hz  
 FIDRES 0.126314 Hz  
 AQ 3.9584243 sec  
 RG 362  
 DW 60.400 usec  
 DE 6.00 usec  
 TE 300.0 K  
 D1 1.00000000 sec

===== CHANNEL f1 =====  
 NUC1 1H  
 P1 6.45 usec  
 PL1 0.00 dB  
 SF01 400.1324710 MHz

F2 - Processing parameters  
 SI 32768  
 SF 400.1300094 MHz  
 WDW EM  
 SSB 0  
 LB 0.30 Hz  
 GB 0  
 PC 1.00

1D NMR plot parameters  
 CX 20.00 cm  
 F1P 11.000 ppm  
 F1 4401.43 Hz  
 F2P -1.000 ppm  
 F2 -400.13 Hz  
 PPMCM 0.60000 ppm/cm  
 HZCM 240.07800 Hz/cm

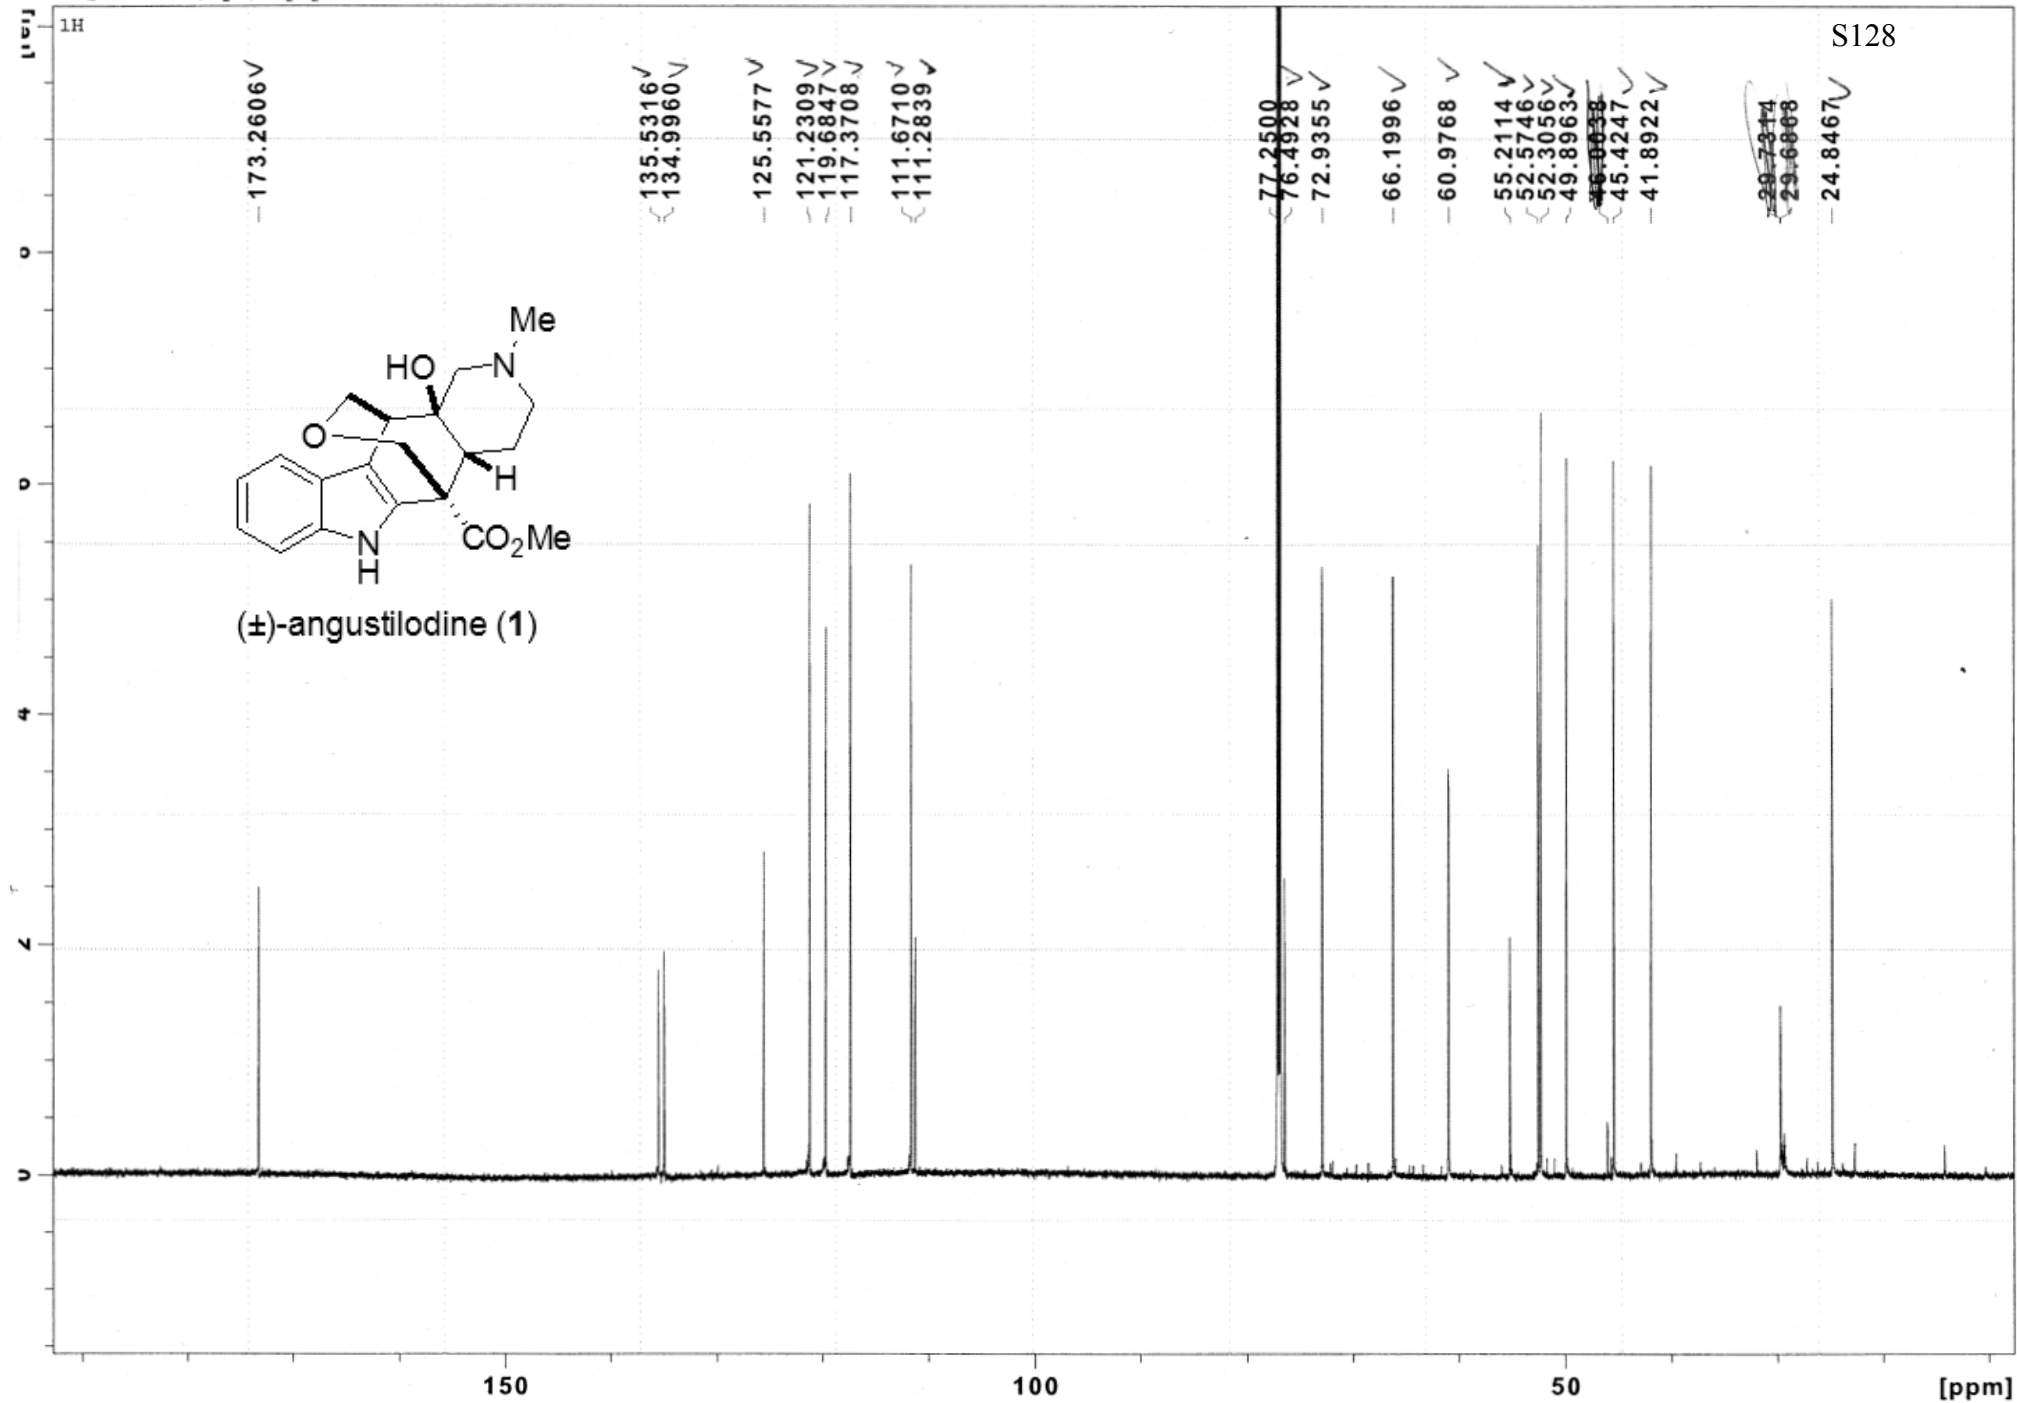

Supplement: NIHMS549093-supplement-2_si_001.pdf [file NIHMS549093-supplement-2_si_001.pdf]
